# Supplementary material for: Allyl-isothiocyanate treatment induces a complex transcriptional reprogramming including heat stress, oxidative stress and plant defence responses in Arabidopsis thaliana
Source: PubMed Central journal article supplement (PMC5027104; doi:10.1186/s12864-016-3039-x), 2016-09-17
Supplement: 12864_2016_3039_MOESM1_ESM.pdf [file 12864_2016_3039_MOESM1_ESM.pdf]

**List of genes significantly affected ( $P < 0.05$  and  $\log_2 \geq 1$  or  $\leq -1$ ) by allyl-ITC after 30min**

| <b>Locus ID</b> | <b>gene description (TAIR)</b>                                                                           | <b>log<sub>2</sub> ITC/mock 30min</b> | <b>adj.P.Val</b> |
|-----------------|----------------------------------------------------------------------------------------------------------|---------------------------------------|------------------|
| At1g01720       | ANAC002 (Arabidopsis NAC domain containing protein 2); Belongs to a large family of putative trans       | 1.23                                  | 5.01E-05         |
| At1g02450       | NIMIN1 (NIM1-interacting 1); NIMIN1 modulates PR gene expression according the following model           | -1.435                                | 0.01559          |
| At1g04000       | unknown protein                                                                                          | 1.057                                 | 0.00059          |
| At1g04770       | Tetratricopeptide repeat (TPR)-like superfamily protein                                                  | 3.01                                  | 1.05E-08         |
| At1g05135       | expressed protein, isoform contains a non-consensus TG acceptor site at intron.; pseudogene of unknow    | 1.048                                 | 0.0003           |
| At1g05575       | unknown protein                                                                                          | 1.586                                 | 1.94E-05         |
| At1g07135       | glycine-rich protein                                                                                     | 2.958                                 | 0.00022          |
| At1g07160       | Protein phosphatase 2C family protein                                                                    | 2.203                                 | 3.92E-05         |
| At1g07390       | AtRLP1 (receptor like protein 1)                                                                         | 1.12                                  | 0.00024          |
| At1g07520       | GRAS family transcription factor                                                                         | 1.042                                 | 0.0006           |
| At1g09350       | AtGolS3 (galactinol synthase 3)                                                                          | 1.376                                 | 0.00038          |
| At1g09500       | NAD(P)-binding Rossmann-fold superfamily protein; similar to Eucalyptus gunnii alcohol dehydrogen        | -1.17                                 | 0.0033           |
| At1g11050       | Protein kinase superfamily protein                                                                       | 1.432                                 | 3.44E-05         |
| At1g11185       | other RNA; Unknown gene                                                                                  | -1.352                                | 0.01263          |
| At1g12030       | Protein of unknown function (DUF506)                                                                     | 3.126                                 | 0.0001           |
| At1g12940       | ATNRT2.5 (nitrate transporter2.5); member of High affinity nitrate transporter family                    | 1.313                                 | 0.02873          |
| At1g13080       | CYP71B2 (cytochrome P450, family 71, subfamily B, polypeptide 2); cytochrome P450 monooxygena            | -1.048                                | 8.33E-05         |
| At1g13210       | ACA.1 (autoinhibited Ca <sup>2+</sup> /ATPase II)                                                        | 1.02                                  | 0.00098          |
| At1g13650       | BEST Arabidopsis thaliana protein match is: 18S pre-ribosomal assembly protein gar2-related (TAIR:.)     | -2.054                                | 0.0004           |
| At1g14200       | RING/U-box superfamily protein                                                                           | 2.159                                 | 2.66E-06         |
| At1g14370       | APK2A (protein kinase 2A); Encodes protein kinase APK2a.                                                 | 1.053                                 | 0.0004           |
| At1g16130       | WAKL2 (wall associated kinase-like 2); wall-associated kinase like                                       | 1.01                                  | 0.00299          |
| At1g16420       | ATMC8 (ARABIDOPSIS THALIANA METACASPASE 8); Encodes a metacaspase (cysteine-type en                      | 1.189                                 | 0.04924          |
| At1g18570       | AtMYB51 (myb domain protein 51); Encodes a member of the R2R3-MYB transcription family. Invol            | 1.262                                 | 0.00056          |
| At1g18710       | AtMYB47 (myb domain protein 47); Member of the R2R3 factor gene family.                                  | -1.499                                | 0.00093          |
| At1g18990       | Protein of unknown function, DUF593                                                                      | -1.096                                | 0.00042          |
| At1g19020       | unknown protein                                                                                          | 1.763                                 | 0.00026          |
| At1g19180       | JAZ1 (jasmonate-zim-domain protein 1); JAZ1 is a nuclear-localized protein involved in jasmonate sig     | 1.104                                 | 0.0061           |
| At1g19320       | Pathogenesis-related thaumatin superfamily protein                                                       | 1.157                                 | 0.00123          |
| At1g20310       | unknown protein                                                                                          | 1.26                                  | 0.0023           |
| At1g20470       | SAUR-like auxin-responsive protein family                                                                | -1.294                                | 0.0003           |
| At1g20823       | RING/U-box superfamily protein                                                                           | 1.433                                 | 0.00232          |
| At1g21240       | WAK3 (wall associated kinase 3); encodes a wall-associated kinase                                        | -1.321                                | 0.04292          |
| At1g21310       | ATEXT3 (extensin 3); Encodes extensin 3.                                                                 | 1.441                                 | 0.0025           |
| At1g21550       | Calcium-binding EF-hand family protein                                                                   | 1.314                                 | 0.00086          |
| At1g21890       | nodulin MtN21 /EamA-like transporter family protein                                                      | -1.386                                | 0.00055          |
| At1g22770       | GI (GIGANTEA); Together with CONSTANTS (CO) and FLOWERING LOCUS T (FT), GIGANTEA                         | 1.014                                 | 7.56E-05         |
| At1g22810       | Integrase-type DNA-binding superfamily protein; encodes a member of the DREB subfamily A-5 of EI         | 3.898                                 | 1.05E-08         |
| At1g23390       | Kelch repeat-containing F-box family protein                                                             | -1.248                                | 0.0004           |
| At1g23840       | unknown protein                                                                                          | -1.099                                | 0.00012          |
| At1g24140       | Matrixin family protein                                                                                  | 2.285                                 | 0.0007           |
| At1g26390       | FAD-binding Berberine family protein                                                                     | -2.155                                | 0.0061           |
| At1g27020       | unknown protein                                                                                          | 1.376                                 | 0.0046           |
| At1g27730       | STZ (salt tolerance zinc finger); Related to Cys2/His2-type zinc-finger proteins found in higher plants. | 4.103                                 | 5.86E-08         |
| At1g27820       | Polynucleotidyl transferase, ribonuclease H-like superfamily protein                                     | 1.483                                 | 4.75E-05         |
| At1g27890       | Polynucleotidyl transferase, ribonuclease H-like superfamily protein                                     | 1.666                                 | 1.52E-05         |
| At1g30135       | JAZ8 (jasmonate-zim-domain protein 8)                                                                    | -1.535                                | 0.00375          |
| At1g30220       | ATINT2 (ARABIDOPSIS THALIANA INOSITOL TRANSPORTER 2); Inositol transporter presentin                     | -1.143                                | 0.00081          |
| At1g30320       | Remorin family protein                                                                                   | -1.004                                | 9.32E-06         |
| At1g30370       | alpha/beta-Hydrolases superfamily protein                                                                | 2.901                                 | 0.00161          |
| At1g30650       | ATWRKY14 (WRKY DNA-BINDING PROTEIN 14); member of WRKY Transcription Factor; Group                       | 1.116                                 | 0.00473          |
| At1g30900       | BP80-3.3 (binding protein of 80 kDa 3.3)                                                                 | -1.157                                | 0.00109          |
| At1g31040       | PLATZ transcription factor family protein                                                                | -1.096                                | 0.00055          |
| At1g32780       | GroES-like zinc-binding dehydrogenase family protein                                                     | -1.021                                | 0.00104          |
| At1g33760       | Integrase-type DNA-binding superfamily protein; encodes a member of the DREB subfamily A-4 of EI         | 2.552                                 | 0.00047          |
| At1g33950       | Avirulence induced gene (AIG1) family protein                                                            | -2.109                                | 0.03777          |
| At1g35210       | unknown protein                                                                                          | 3.062                                 | 1.10E-06         |
| At1g36370       | SHM7 (serine hydroxymethyltransferase 7); Encodes a putative serine hydroxymethyltransferase.            | 1.653                                 | 3.37E-05         |
| At1g43000       | PLATZ transcription factor family protein                                                                | 1.027                                 | 0.00042          |
| At1g45145       | ATH5 (THIOREDOXIN H-TYPE 5); encodes a cytosolic thioredoxin that reduces disulfide bridges of           | -1.141                                | 0.02523          |
| At1g49530       | GGPS6 (geranylgeranyl pyrophosphate synthase 6); encodes a mitochondria-targeted geranylgeranyl p        | -1.222                                | 0.00018          |
| At1g49640       | alpha/beta-Hydrolases superfamily protein                                                                | 1.271                                 | 0.01155          |
| At1g49980       | DNA/RNA polymerases superfamily protein                                                                  | -1.02                                 | 0.00056          |
| At1g50040       | Protein of unknown function (DUF1005)                                                                    | -1.175                                | 0.00639          |
| At1g51140       | basic helix-loop-helix (bHLH) DNA-binding superfamily protein                                            | -1.087                                | 1.80E-05         |

|           |                                                                                                                    |        |          |
|-----------|--------------------------------------------------------------------------------------------------------------------|--------|----------|
| At1g51790 | Leucine-rich repeat protein kinase family protein                                                                  | 1.04   | 0.01234  |
| At1g52250 | NA                                                                                                                 | -1.136 | 0.00228  |
| At1g52342 | unknown protein                                                                                                    | -1.542 | 0.00392  |
| At1g53100 | Core-2/I-branching beta-1,6-N-acetylglucosaminyltransferase family protein                                         | -1.236 | 0.00874  |
| At1g53885 | Protein of unknown function (DUF581)                                                                               | -2.452 | 0.00021  |
| At1g55920 | ATSERAT2.1 (serine acetyltransferase 2.1); Encodes a chloroplast/cytosol localized serine O-acetyltra              | 1.278  | 3.22E-06 |
| At1g56240 | AtPP2-B13 (phloem protein 2-B13)                                                                                   | 1.596  | 0.0131   |
| At1g56300 | Chaperone DnaJ-domain superfamily protein                                                                          | 1.451  | 3.18E-05 |
| At1g56650 | ATMYB75 (MYB DOMAIN PROTEIN 75); Encodes a putative MYB domain containing transcrip                                | -1.445 | 0.00638  |
| At1g58225 | unknown protein                                                                                                    | -1.267 | 0.0017   |
| At1g59860 | HSP20-like chaperones superfamily protein                                                                          | 1.924  | 2.44E-05 |
| At1g59870 | ABCG36 (ATP-BINDING CASSETTE G36); ATP binding cassette transporter. Localized to the plas                         | 1.206  | 9.22E-05 |
| At1g61120 | GES (GERANYLLINALOOL SYNTHASE); Encodes a geranyllinalool synthase that produces a precu                           | -1.352 | 0.03132  |
| At1g61290 | SYPI24 (syntaxin of plants 124); member of SYP12 Gene Family                                                       | 1.174  | 0.00083  |
| At1g61380 | SD1-29 (S-domain-1 29)                                                                                             | 1.144  | 4.81E-05 |
| At1g61470 | Polynucleotidyl transferase, ribonuclease H-like superfamily protein                                               | 1.598  | 1.38E-05 |
| At1g61610 | S-locus lectin protein kinase family protein                                                                       | -1.415 | 0.00038  |
| At1g62180 | APR2 (5'adenylphosphosulfate reductase 2); encodes a adenosine 5'-phosphosulfate reductase, involv                 | 1.304  | 1.79E-05 |
| At1g63750 | Disease resistance protein (TIR-NBS-LRR class) family                                                              | 1.03   | 0.0008   |
| At1g63857 | NA                                                                                                                 | 1.035  | 0.00033  |
| At1g64170 | ATCHX16 (cation/H <sup>+</sup> exchanger 16); member of Putative Na <sup>+</sup> /H <sup>+</sup> antiporter family | 1.436  | 0.00047  |
| At1g65890 | AAE12 (acyl activating enzyme 12)                                                                                  | -1.118 | 0.00232  |
| At1g66090 | Disease resistance protein (TIR-NBS class)                                                                         | 2.178  | 0.00443  |
| At1g66230 | AtMYB20 (myb domain protein 20); Encodes a putative transcription factor (MYB20).                                  | -1.192 | 5.11E-05 |
| At1g66370 | AtMYB113 (myb domain protein 113); Encodes a member of the MYB family of transcription factors.                    | -2.235 | 0.00249  |
| At1g66860 | Class I glutamine amidotransferase-like superfamily protein                                                        | -2.61  | 4.34E-05 |
| At1g66870 | Carbohydrate-binding X8 domain superfamily protein                                                                 | -1.332 | 0.01752  |
| At1g68190 | B-box zinc finger family protein                                                                                   | -1.246 | 4.02E-05 |
| At1g68870 | ATSOFL2 (SOB FIVE-LIKE 2); AtSOFL1 acts redundantly with AtSOFL2 as positive regulator of cyt                      | -1.294 | 3.22E-05 |
| At1g70290 | TPS8 (trehalose-6-phosphatase synthase S8); Encodes an enzyme putatively involved in trehalose bios                | -1.181 | 0.00088  |
| At1g70700 | JAZ9 (JASMONATE-ZIM-DOMAIN PROTEIN 9); JAZ9 is a protein presumed to be involved in jasn                           | -1.269 | 1.14E-05 |
| At1g71400 | AtRLP12 (receptor like protein 12); Encodes a CLAVATA2 (CLV2)-related gene. Complements the cl                     | 1.286  | 8.91E-05 |
| At1g71520 | Integrase-type DNA-binding superfamily protein; encodes a member of the DREB subfamily A-5 of EI                   | 1.939  | 3.37E-05 |
| At1g72910 | Toll-Interleukin-Resistance (TIR) domain-containing protein                                                        | 2.056  | 0.01274  |
| At1g72920 | Toll-Interleukin-Resistance (TIR) domain family protein                                                            | 2.155  | 0.0005   |
| At1g72940 | Toll-Interleukin-Resistance (TIR) domain-containing protein                                                        | 1.084  | 0.00143  |
| At1g73500 | MKK9 (MAP kinase kinase 9); member of MAP Kinase Kinase family. Autophosphorylates and also p                      | 1.168  | 5.16E-05 |
| At1g75770 | unknown protein                                                                                                    | -1.151 | 1.31E-05 |
| At1g76110 | HMG (high mobility group) box protein with ARID/BRIGHT DNA-binding domain                                          | -1.537 | 9.25E-05 |
| At1g76600 | unknown protein                                                                                                    | 1.537  | 0.00011  |
| At1g76640 | Calcium-binding EF-hand family protein                                                                             | -1.995 | 0.0069   |
| At1g76680 | ATOPR1 (ARABIDOPSIS 12-OXOPHYTODIENOATE REDUCTASE 1); Encodes a member of an a                                     | 1.578  | 0.0006   |
| At1g76930 | ATEXT1 (EXTENSIN 1); Encodes an Arabidopsis extensin gene that belongs to cell-wall hydroxyprol                    | 1.374  | 0.0033   |
| At1g77120 | ADH (ALCOHOL DEHYDROGENASE); Catalyzes the reduction of acetaldehyde using NADH as rec                             | 1.288  | 0.0276   |
| At1g77450 | anac032 (NAC domain containing protein 32)                                                                         | 1.011  | 0.00079  |
| At1g77640 | Integrase-type DNA-binding superfamily protein; encodes a member of the DREB subfamily A-5 of EI                   | 1.143  | 0.00093  |
| At1g78410 | VQ motif-containing protein                                                                                        | 1.598  | 0.0018   |
| At1g79310 | AtMC7 (metacaspase 7)                                                                                              | -1.371 | 0.00012  |
| At1g79410 | 5-Oct (organic cation/carnitine transporter5)                                                                      | 1.322  | 6.48E-06 |
| At1g80840 | WRKY40 (WRKY DNA-binding protein 40); Pathogen-induced transcription factor. Binds W-box seq                       | 3.049  | 0.0004   |
| At2g01170 | BAT1 (bidirectional amino acid transporter 1); Encodes a bidirectional amino acid transporter that can             | 1.007  | 3.26E-05 |
| At2g01180 | ATPAP1 (phosphatidic acid phosphatase 1); Encodes phosphatidate phosphatase. Up-regulated by gen                   | 1.052  | 0.0014   |
| At2g01890 | ATPAP8 (PURPLE ACID PHOSPHATASE 8); Encodes a purple acid phosphatase (PAP) belonging to                           | -1.548 | 7.19E-05 |
| At2g02810 | ATUTR1 (UDP-GALACTOSE TRANSPORTER 1); Encodes a multitransmembrane hydrophobic pro                                 | -1.175 | 6.48E-06 |
| At2g02950 | PKS1 (phytochrome kinase substrate 1); Encodes a basic soluble protein which can independently binc                | -1.107 | 0.0002   |
| At2g03230 | GCK domain-containing protein                                                                                      | 1.321  | 0.00152  |
| At2g04450 | ATNUDT6 (nudix hydrolase homolog 6); Encodes a protein with NADH pyrophosphatase activity. Alt                     | -1.544 | 0.00797  |
| At2g13810 | ALD1 (AGD2-like defense response protein 1)                                                                        | -1.78  | 0.03855  |
| At2g14610 | ATPR1 (PATHOGENESIS-RELATED GENE 1); PR1 gene expression is induced in response to a var                           | -2.733 | 0.00908  |
| At2g15390 | FUT4 (fucosyltransferase 4); Predicted fucosyltransferase, based on similarity to FUT1, but not functio            | 1.072  | 0.00122  |
| At2g15480 | UGT73B5 (UDP-glucosyl transferase 73B5)                                                                            | 1.091  | 0.0003   |
| At2g15490 | UGT73B4 (UDP-glycosyltransferase 73B4)                                                                             | 1.116  | 0.0017   |
| At2g17740 | Cysteine/Histidine-rich C1 domain family protein                                                                   | 1.496  | 0.01656  |
| At2g18210 | unknown protein                                                                                                    | 1.141  | 0.0026   |
| At2g18560 | UDP-Glycosyltransferase superfamily protein                                                                        | -1.055 | 0.00076  |
| At2g18700 | ATTPS11 (trehalose phosphatase/synthase 11); Encodes an enzyme putatively involved in trehalose bi                 | -1.375 | 0.0004   |
| At2g19190 | FRK1 (FLG22-induced receptor-like kinase 1); Receptor-like protein kinase. Involved in early defense               | 1.899  | 0.00541  |

|           |                                                                                                       |        |          |
|-----------|-------------------------------------------------------------------------------------------------------|--------|----------|
| At2g20142 | Toll-Interleukin-Resistance (TIR) domain family protein                                               | 1.23   | 0.0309   |
| At2g20670 | Protein of unknown function (DUF506)                                                                  | -1.254 | 0.00385  |
| At2g21660 | ATGRP7 (GLYCINE RICH PROTEIN 7); Encodes a small glycine-rich RNA binding protein that is p           | 1.248  | 0.0029   |
| At2g22496 | MIR779A (microRNA779A); Encodes a microRNA of unknown function. MicroRNAs are regulatory l            | 1.97   | 2.56E-05 |
| At2g22770 | NAI1 (basic helix-loop-helix (bHLH) DNA-binding superfamily protein); regulates the development of    | -2.103 | 2.70E-06 |
| At2g22880 | VQ motif-containing protein                                                                           | 2.045  | 0.0002   |
| At2g25200 | Plant protein of unknown function (DUF868)                                                            | -1.122 | 0.00059  |
| At2g25735 | unknown protein                                                                                       | 1.141  | 0.00048  |
| At2g26150 | ATHSFA2 (heat shock transcription factor A2); member of Heat Stress Transcription Factor (Hsf) fam    | 2.274  | 2.44E-05 |
| At2g26530 | AR781 (Protein of unknown function (DUF1645)); unknown function                                       | 1.861  | 1.34E-05 |
| At2g26560 | PLA IIA (PHOSPHOLIPASE A 2A); Encodes a lipid acyl hydrolase with wide substrate specificity th       | 1.372  | 0.0285   |
| At2g28056 | MIR172 (MICRORNA 172); Encodes a microRNA that targets several genes containing AP2 domains           | 1.037  | 3.90E-05 |
| At2g28305 | LOG1 (LONELY GUY 1)                                                                                   | -1.262 | 0.0004   |
| At2g29300 | NAD(P)-binding Rossmann-fold superfamily protein                                                      | -1.374 | 0.00046  |
| At2g29310 | NAD(P)-binding Rossmann-fold superfamily protein                                                      | -1.004 | 8.26E-05 |
| At2g29350 | SAG13 (senescence-associated gene 13); senescence-associated gene SAG13 encoding a short-chain a      | -1.775 | 0.0218   |
| At2g29440 | ATGSTU6 (glutathione S-transferase tau 6); Encodes glutathione transferase belonging to the tau class | -1.353 | 7.14E-06 |
| At2g29450 | ATGSTU1 (ARABIDOPSIS THALIANA GLUTATHIONE S-TRANSFERASE TAU 1); Encodes a n                           | -1.275 | 0.00011  |
| At2g29720 | CTF2B (FAD/NAD(P)-binding oxidoreductase family protein); Encodes CTF2B.                              | 1.159  | 6.48E-06 |
| At2g30550 | alpha/beta-Hydrolases superfamily protein; Encodes a lipase that hydrolyzes phosphatidylcholine, glyc | -1.042 | 5.25E-05 |
| At2g31180 | ATMYB14 (ARABIDOPSIS THALIANA MYB DOMAIN PROTEIN 14); Member of the R2R3 facto                        | -1.255 | 0.00135  |
| At2g31945 | unknown protein                                                                                       | 1.522  | 0.00047  |
| At2g32030 | Acyl-CoA N-acyltransferases (NAT) superfamily protein                                                 | 2.588  | 8.33E-07 |
| At2g32150 | Haloacid dehalogenase-like hydrolase (HAD) superfamily protein                                        | -1.419 | 0.0037   |
| At2g32200 | unknown protein                                                                                       | 1.185  | 0.00945  |
| At2g34600 | JAZ7 (jasmonate-zim-domain protein 7)                                                                 | -2.481 | 0.00069  |
| At2g34940 | BP80-3.2 (binding protein of 80 kDa 3.2)                                                              | -1.052 | 0.00581  |
| At2g35658 | unknown protein                                                                                       | 1.28   | 0.0007   |
| At2g35710 | Nucleotide-diphospho-sugar transferases superfamily protein                                           | 1.158  | 0.0014   |
| At2g35930 | PUB23 (plant U-box 23); Encodes a cytoplasmically localized U-box domain containing E3 ubiquitin l    | 1.296  | 6.26E-06 |
| At2g36650 | unknown protein                                                                                       | -1.007 | 0.00604  |
| At2g36690 | 2-oxoglutarate (2OG) and Fe(II)-dependent oxygenase superfamily protein                               | 1.095  | 0.01719  |
| At2g37430 | C2H2 and C2HC zinc fingers superfamily protein                                                        | 3.183  | 3.75E-07 |
| At2g37870 | Bifunctional inhibitor/lipid-transfer protein/seed storage 2S albumin superfamily protein             | -1.219 | 0.0053   |
| At2g37900 | Major facilitator superfamily protein                                                                 | -1.103 | 0.00287  |
| At2g38470 | ATWRKY33 (WRKY DNA-BINDING PROTEIN 33); Member of the plant WRKY transcription fact                   | 2.732  | 2.90E-06 |
| At2g38600 | HAD superfamily, subfamily IIIB acid phosphatase                                                      | -1.623 | 0.0001   |
| At2g38820 | Protein of unknown function (DUF506)                                                                  | -1.03  | 5.22E-05 |
| At2g39200 | ATMLO12 (MILDEW RESISTANCE LOCUS O 12); A member of a large family of seven-transmemt                 | 1.05   | 0.0409   |
| At2g39380 | ATEXO70H2 (exocyst subunit exo70 family protein H2); A member of EXO70 gene family, putative e        | 1.472  | 0.00554  |
| At2g39518 | Uncharacterised protein family (UPF0497)                                                              | 1.32   | 0.0073   |
| At2g39650 | Protein of unknown function (DUF506)                                                                  | 2.17   | 1.14E-05 |
| At2g40095 | Alpha/beta hydrolase related protein                                                                  | 1.184  | 0.00014  |
| At2g40140 | SZF2 ((SALT-INDUCIBLE ZINC FINGER 2)                                                                  | 1.912  | 4.51E-05 |
| At2g41010 | ATCAMBP25 (calmodulin (CAM)-binding protein of 25 kDa); Encodes a novel calmodulin binding p          | 1.34   | 7.92E-05 |
| At2g41230 | unknown protein                                                                                       | 1.59   | 0.00143  |
| At2g41250 | Haloacid dehalogenase-like hydrolase (HAD) superfamily protein                                        | -1.001 | 0.0011   |
| At2g41510 | ATCKX1 (CYTOKININ OXIDASE/DEHYDROGENASE 1); It encodes a protein whose sequence is s                  | 1.213  | 0.0019   |
| At2g41640 | Glycosyltransferase family 61 protein                                                                 | 1.054  | 0.00814  |
| At2g42900 | Plant basic secretory protein (BSP) family protein                                                    | -1.469 | 3.90E-05 |
| At2g43570 | CHI (chitinase, putative)                                                                             | -1.69  | 0.02436  |
| At2g43620 | Chitinase family protein                                                                              | 1.694  | 0.00629  |
| At2g44080 | ARL (ARGOS-like); Encodes ARL, a gene similar to ARGOS involved in cell expansion-dependent o         | 1.37   | 2.14E-05 |
| At2g44130 | Galactose oxidase/kelch repeat superfamily protein                                                    | -1.04  | 0.00037  |
| At2g44230 | Plant protein of unknown function (DUF946)                                                            | -1.653 | 1.59E-05 |
| At2g44240 | Protein of Unknown Function (DUF239)                                                                  | -3.535 | 0.00301  |
| At2g44578 | RING/U-box superfamily protein                                                                        | -1.099 | 0.00032  |
| At2g44840 | ATERF13 (ETHYLENE-RESPONSIVE ELEMENT BINDING FACTOR 13); encodes a member of th                       | 2.111  | 0.0024   |
| At2g45350 | CRR4 (CHLORORESPIRATORY REDUCTION 4); Encodes a member of a PCMP (plant combinator                    | -1.03  | 1.78E-05 |
| At2g46240 | ATBAG6 (ARABIDOPSIS THALIANA BCL-2-ASSOCIATED ATHANOGENE 6); A member of Ar                           | 1.282  | 0.0005   |
| At2g46510 | AIB (ABA-inducible BHLH-type transcription factor); Encodes a nuclear localized BLH domain conta      | -1.059 | 0.00013  |
| At2g46970 | PIL1 (phytochrome interacting factor 3-like 1); encodes a novel Myc-related bHLH transcription factor | 1.121  | 0.0006   |
| At3g02840 | ARM repeat superfamily protein                                                                        | 1.87   | 0.00024  |
| At3g04717 | pseudogene, similar to pathogen- and wound-inducible antifungal protein CBP20 precursor, similar to   | -1.514 | 0.00326  |
| At3g05370 | AtRLP31 (receptor like protein 31)                                                                    | 1.295  | 0.00032  |
| At3g05936 | unknown protein                                                                                       | -1.552 | 6.34E-05 |
| At3g09520 | ATEXO70H4 (exocyst subunit exo70 family protein H4); A member of EXO70 gene family, putative e        | 1.086  | 0.00047  |

|           |                                                                                                         |        |          |
|-----------|---------------------------------------------------------------------------------------------------------|--------|----------|
| At3g09870 | SAUR-like auxin-responsive protein family                                                               | 2.539  | 4.15E-05 |
| At3g10930 | unknown protein                                                                                         | 1.554  | 4.83E-07 |
| At3g11820 | ATSYR1 (SYNTAXIN RELATED PROTEIN 1); Encodes a syntaxin localized at the plasma membran                 | 1.025  | 0.0005   |
| At3g11840 | PUB24 (plant U-box 24); Encodes a U-box-domain-containing E3 ubiquitin ligase that acts as a negati     | 1.04   | 0.0016   |
| At3g12890 | ASML2 (activator of spomin::LUC2); Encodes a protein belonging to a class of CCT (CONSTANS, C           | 1.07   | 0.0069   |
| At3g14200 | Chaperone DnaJ-domain superfamily protein                                                               | 1.565  | 2.90E-06 |
| At3g14760 | unknown protein                                                                                         | -1.029 | 0.00292  |
| At3g15270 | SPL5 (squamosa promoter binding protein-like 5); Encodes a member of the SPL (squamosa-promoter         | -1.101 | 0.00222  |
| At3g15450 | Aluminium induced protein with YGL and LRDR motifs                                                      | -1.658 | 8.60E-05 |
| At3g15518 | unknown protein                                                                                         | 1.497  | 8.91E-05 |
| At3g15536 | Unknown gene; Unknown gene                                                                              | -2.64  | 0.00665  |
| At3g15770 | unknown protein                                                                                         | -1.02  | 1.20E-05 |
| At3g16120 | Dynein light chain type 1 family protein                                                                | -1.233 | 0.00033  |
| At3g16720 | ATL2 (TOXICOS EN LEVADURA 2); RING-H2 protein induced after exposure to chitin or inactivate            | 1.987  | 2.42E-05 |
| At3g19200 | unknown protein                                                                                         | -1.183 | 0.00084  |
| At3g21150 | BBX32 (B-box 32); Encodes a protein with a B-box domain predicted to act as a transcription factor. F   | 1.333  | 0.01484  |
| At3g21870 | CYCP2.1 (cyclin p2.1)                                                                                   | -1.22  | 0.0028   |
| At3g22120 | CWLP (cell wall-plasma membrane linker protein); cell wall-plasma membrane linker protein homolog       | 1.107  | 0.008    |
| At3g22121 | other RNA; Potential natural antisense gene, locus overlaps with AT3G22120                              | 1.309  | 0.00417  |
| At3g22142 | Bifunctional inhibitor/lipid-transfer protein/seed storage 2S albumin superfamily protein; Encodes a Pr | 1.189  | 0.0011   |
| At3g22275 | unknown protein                                                                                         | -2.751 | 6.61E-06 |
| At3g22886 | MIR167A (microRNA167A); Encodes a microRNA that targets ARF family members ARF6 and ARF                 | 1.428  | 3.22E-05 |
| At3g23230 | Integrase-type DNA-binding superfamily protein; encodes a member of the ERF (ethylene response fac      | 3.023  | 1.72E-05 |
| At3g23240 | ATERF1 (ETHYLENE RESPONSE FACTOR 1); encodes a member of the ERF (ethylene response fa                  | 1.579  | 0.00043  |
| At3g23250 | ATMYB15 (MYB DOMAIN PROTEIN 15); Member of the R2R3 factor gene family.                                 | 1.501  | 0.0002   |
| At3g23880 | F-box and associated interaction domains-containing protein                                             | -1.485 | 0.00024  |
| At3g25010 | AtRLP41 (receptor like protein 41)                                                                      | -1.625 | 0.03261  |
| At3g25180 | CYP82G1 (cytochrome P450, family 82, subfamily G, polypeptide 1); member of CYP82G                      | -1.878 | 0.00843  |
| At3g25250 | OXI1 (oxidative signal-inducible1); Arabidopsis protein kinase                                          | 2.405  | 2.90E-06 |
| At3g25600 | Calcium-binding EF-hand family protein                                                                  | 1.115  | 0.00041  |
| At3g25882 | NIMIN-2 (NIM1-interacting 2); encodes a kinase that physically interacts with NPR1/NIM1                 | -1.427 | 0.00276  |
| At3g28270 | Protein of unknown function (DUF677)                                                                    | -1.413 | 0.0014   |
| At3g28340 | GATL10 (galacturonosyltransferase-like 10); Encodes a protein with putative galacturonosyltransferas    | 1.545  | 0.0004   |
| At3g28510 | P-loop containing nucleoside triphosphate hydrolases superfamily protein                                | -2.64  | 0.009    |
| At3g28540 | P-loop containing nucleoside triphosphate hydrolases superfamily protein                                | -1.14  | 0.0477   |
| At3g29000 | Calcium-binding EF-hand family protein                                                                  | 2.679  | 3.07E-07 |
| At3g29240 | Protein of unknown function (DUF179)                                                                    | -1.005 | 0.0008   |
| At3g29370 | unknown protein                                                                                         | -1.265 | 0.0021   |
| At3g44350 | anac061 (NAC domain containing protein 61)                                                              | -1.382 | 0.00474  |
| At3g45640 | ATMPK3 (mitogen-activated protein kinase 3); Encodes a mitogen-activated kinase whose mRNA lev          | 1.225  | 0.00116  |
| At3g46300 | unknown protein                                                                                         | -1.484 | 0.00142  |
| At3g46490 | 2-oxoglutarate (2OG) and Fe(II)-dependent oxygenase superfamily protein                                 | -1.005 | 0.00446  |
| At3g46620 | zinc finger (C3HC4-type RING finger) family protein                                                     | 1.548  | 1.09E-05 |
| At3g48080 | alpha/beta-Hydrolases superfamily protein                                                               | -1.288 | 0.03102  |
| At3g48360 | BT2 (BTB and TAZ domain protein 2); encodes a protein (BT2) that is an essential component of the r     | -2.059 | 9.05E-05 |
| At3g48520 | CYP94B3 (cytochrome P450, family 94, subfamily B, polypeptide 3); member of CYP94B                      | -1.031 | 0.01702  |
| At3g49530 | ANAC062 (NAC domain containing protein 62); Transcription factor that serves as a molecular link b      | 1.02   | 4.82E-05 |
| At3g49570 | LSU3 (RESPONSE TO LOW SULFUR 3)                                                                         | 4.706  | 3.97E-08 |
| At3g49580 | LSU1 (RESPONSE TO LOW SULFUR 1)                                                                         | 2.955  | 1.36E-05 |
| At3g49790 | Carbohydrate-binding protein                                                                            | -1.234 | 5.38E-05 |
| At3g50060 | MYB77 (myb domain protein 77); Encodes a member of the R2R3 transcription factor gene family. Ex        | 1.654  | 0.00049  |
| At3g50280 | HXXXD-type acyl-transferase family protein                                                              | -1.902 | 0.00017  |
| At3g50560 | NAD(P)-binding Rossmann-fold superfamily protein                                                        | -1.186 | 0.00131  |
| At3g50930 | BCS1 (cytochrome BC1 synthesis)                                                                         | 1.121  | 0.0081   |
| At3g51180 | Zinc finger C-x8-C-x5-C-x3-H type family protein                                                        | 1.143  | 0.00033  |
| At3g52400 | SYPI22 (syntaxin of plants 122); syntaxin protein, involved in the negative regulation of defense path  | 1.285  | 0.0005   |
| At3g53232 | DVL20 (DEVIL 20)                                                                                        | -1.141 | 0.00109  |
| At3g54880 | unknown protein                                                                                         | -1.156 | 0.00032  |
| At3g55150 | ATEXO70H1 (exocyst subunit exo70 family protein H1); A member of EXO70 gene family, putative e          | 1.047  | 0.00308  |
| At3g55630 | ATDFD (DHFS-FPGS homolog D)                                                                             | -1.1   | 4.94E-05 |
| At3g55840 | Hs1pro-1 protein                                                                                        | 1.023  | 0.0034   |
| At3g56275 | expressed protein; pseudogene of unknown protein                                                        | -1.343 | 0.0074   |
| At3g56710 | SIB1 (sigma factor binding protein 1); Sig1 binding protein; interacts with Sig1R4. As well as Sig1, Si | 1.52   | 0.00021  |
| At3g56880 | VQ motif-containing protein                                                                             | 1.176  | 0.0002   |
| At3g57530 | CPK32 (calcium-dependent protein kinase 32); Calcium-dependent Protein Kinase. ABA signaling cor        | 1.104  | 0.00013  |
| At3g59900 | ARGOS (AUXIN-REGULATED GENE INVOLVED IN ORGAN SIZE); Encodes ARGOS (Auxin-Reg                           | 1.404  | 7.79E-06 |
| At3g61060 | AtPP2-A13 (phloem protein 2-A13)                                                                        | -1.025 | 0.0031   |

|           |                                                                                                         |        |          |
|-----------|---------------------------------------------------------------------------------------------------------|--------|----------|
| At3g61190 | BAP1 (BON association protein 1); Encodes a protein with a C2 domain that binds to BON1 in yeast t      | 1.662  | 0.0059   |
| At3g61198 | other RNA; Unknown gene                                                                                 | -1.08  | 1.91E-05 |
| At3g62090 | PIF6 (PHYTOCHROME-INTERACTING FACTOR 6); encodes a novel Myc-related bHLH transcript                    | 1.089  | 4.94E-05 |
| At3g62950 | Thioredoxin superfamily protein                                                                         | -1.01  | 0.03274  |
| At4g00700 | C2 calcium/lipid-binding plant phosphoribosyltransferase family protein                                 | -1.122 | 0.03516  |
| At4g01026 | PYL7 (PYR1-like 7); Encodes a member of the PYR (pyrabactin resistance )/PYL(PYR1-like)/RCAR            | -1.112 | 5.02E-05 |
| At4g01460 | basic helix-loop-helix (bHLH) DNA-binding superfamily protein                                           | -1.155 | 8.45E-05 |
| At4g01680 | AtMYB55 (myb domain protein 55); Encodes a putative transcription factor (MYB55).                       | -1.085 | 0.00138  |
| At4g01870 | tolB protein-related                                                                                    | 1.037  | 0.0047   |
| At4g02410 | Concanavalin A-like lectin protein kinase family protein                                                | 1.455  | 4.12E-05 |
| At4g03400 | DFL2 (DWARF IN LIGHT 2); Encodes a GH3-related gene involved in red light-specific hypocotyl el         | 1.013  | 3.26E-05 |
| At4g04490 | CRK36 (cysteine-rich RLK (RECEPTOR-like protein kinase) 36); Encodes a cysteine-rich receptor-lik       | -1.232 | 0.03545  |
| At4g04500 | CRK37 (cysteine-rich RLK (RECEPTOR-like protein kinase) 37); Encodes a cysteine-rich receptor-lik       | -2.1   | 0.00633  |
| At4g04610 | APR1 (APS reductase 1); Encodes a protein disulfide isomerase-like (PDIL) protein, a member of a m      | 1.744  | 1.29E-05 |
| At4g08555 | unknown protein                                                                                         | 1.056  | 0.01739  |
| At4g08910 | unknown protein                                                                                         | -1.185 | 0.0022   |
| At4g10500 | 2-oxoglutarate (2OG) and Fe(II)-dependent oxygenase superfamily protein                                 | -2.496 | 0.02758  |
| At4g10910 | unknown protein                                                                                         | -1.543 | 0.00047  |
| At4g11655 | Uncharacterised protein family (UPF0497)                                                                | -1.492 | 0.01683  |
| At4g12470 | AZI1 (azelaic acid induced 1); Encodes AZI1 (AZELAIC ACID INDUCED 1). Involved in the primin            | 2.024  | 0.00857  |
| At4g12480 | pEARLI 1 (Bifunctional inhibitor/lipid-transfer protein/seed storage 2S albumin superfamily protein);   | 2.432  | 0.01651  |
| At4g12500 | Bifunctional inhibitor/lipid-transfer protein/seed storage 2S albumin superfamily protein               | 2.425  | 0.02181  |
| At4g12970 | STOMAGEN (STOMAGEN); Encodes a cysteine-rich peptide, a secretory factor that is produced in tf         | -1.14  | 0.00047  |
| At4g14390 | Ankyrin repeat family protein                                                                           | -1.5   | 0.00099  |
| At4g14450 | unknown protein                                                                                         | 2.274  | 4.42E-06 |
| At4g15248 | B-box type zinc finger family protein                                                                   | 1.273  | 0.02128  |
| At4g15550 | IAGLU (indole-3-acetate beta-D-glucosyltransferase); UDP-glucose:indole-3-acetate beta-D-glucosyltr     | 1.51   | 5.65E-06 |
| At4g15630 | Uncharacterised protein family (UPF0497)                                                                | -1.184 | 0.00017  |
| At4g15975 | RING/U-box superfamily protein                                                                          | 1.627  | 5.28E-05 |
| At4g17030 | ATEXLB1 (expansin-like B1); Encodes EXLB1 (expansin-like B1), a member of the expansin family.          | -1.054 | 0.002    |
| At4g17490 | ATERF6 (ethylene responsive element binding factor 6); Encodes a member of the ERF (ethylene resp       | 1.585  | 0.0003   |
| At4g18200 | NA                                                                                                      | 1.146  | 0.0008   |
| At4g19520 | disease resistance protein (TIR-NBS-LRR class) family                                                   | 1.709  | 0.0004   |
| At4g20000 | VQ motif-containing protein                                                                             | 1.044  | 0.02058  |
| At4g21990 | APR3 (APS reductase 3); Encodes a protein disulfide isomerase-like (PDIL) protein, a member of a m      | 2.687  | 1.66E-07 |
| At4g22470 | protease inhibitor/seed storage/lipid transfer protein (LTP) family protein                             | 2.236  | 0.00308  |
| At4g22485 | Bifunctional inhibitor/lipid-transfer protein/seed storage 2S albumin superfamily protein; Encodes a Pr | 1.09   | 0.01953  |
| At4g22505 | Bifunctional inhibitor/lipid-transfer protein/seed storage 2S albumin superfamily protein               | 1.066  | 0.01274  |
| At4g23600 | COR13 (CORONATINE INDUCED 1); Encodes cystine lyase which is expected to be involved in ami             | 1.042  | 0.0363   |
| At4g23810 | WRKY53 (WRKY family transcription factor); member of WRKY Transcription Factor; Group III               | 1.531  | 0.0001   |
| At4g24160 | alpha/beta-Hydrolases superfamily protein; Encodes a soluble lysophosphatidic acid acyltransferase wi   | 1.251  | 0.0005   |
| At4g24380 | INVOLVED IN: 10-formyltetrahydrofolate biosynthetic process, folic acid and derivative biosynthetic     | 1.273  | 0.00069  |
| At4g24570 | DIC2 (dicarboxylate carrier 2); Encodes one of the mitochondrial dicarboxylate carriers (DIC): DIC1 (   | 3.146  | 1.31E-05 |
| At4g25000 | AMY1 (alpha-amylase-like); Predicted to be secreted protein based on signalP prediction. Involved in    | -1.826 | 0.00176  |
| At4g25480 | CBF3 (C-REPEAT BINDING FACTOR 3); encodes a member of the DREB subfamily A-1 of ERF/A                   | 1.007  | 0.0002   |
| At4g25750 | ABC-2 type transporter family protein                                                                   | 1.14   | 0.00441  |
| At4g25780 | CAP (Cysteine-rich secretory proteins, Antigen 5, and Pathogenesis-related 1 protein) superfamily pro   | -1.005 | 0.00107  |
| At4g26200 | ACS7 (1-amino-cyclopropane-1-carboxylate synthase 7); Member of a family of proteins in Arabidops       | 1.589  | 0.00974  |
| At4g27280 | Calcium-binding EF-hand family protein                                                                  | 2.118  | 0.00048  |
| At4g27410 | ANAC072 (Arabidopsis NAC domain containing protein 72); Encodes a NAC transcription factor indu         | -1.064 | 0.00566  |
| At4g27652 | unknown protein                                                                                         | 1.133  | 6.54E-05 |
| At4g27657 | unknown protein                                                                                         | 1.598  | 0.00034  |
| At4g28350 | Concanavalin A-like lectin protein kinase family protein                                                | 1.126  | 0.0002   |
| At4g29520 | LOCATED IN: endoplasmic reticulum, plasma membrane                                                      | -1.035 | 0.00012  |
| At4g29610 | Cytidine/deoxycytidylate deaminase family protein                                                       | 1.57   | 0.00013  |
| At4g29780 | unknown protein                                                                                         | 2.489  | 0.00012  |
| At4g30180 | sequence-specific DNA binding transcription factors                                                     | -1.498 | 0.00112  |
| At4g31550 | WRKY11 (WRKY DNA-binding protein 11); member of WRKY Transcription Factor; Group II-d; ne               | 1.081  | 0.0002   |
| At4g33070 | Thiamine pyrophosphate dependent pyruvate decarboxylase family protein                                  | 1.695  | 0.04413  |
| At4g33550 | Bifunctional inhibitor/lipid-transfer protein/seed storage 2S albumin superfamily protein               | -1.24  | 0.00345  |
| At4g33666 | unknown protein                                                                                         | -1.032 | 0.03245  |
| At4g34131 | UGT73B3 (UDP-glucosyl transferase 73B3)                                                                 | 1.489  | 0.00021  |
| At4g34135 | UGT73B2 (UDP-glucosyltransferase 73B2); The At4g34135 gene encodes a flavonol 7-O-glucosyltran          | 1.352  | 0.00127  |
| At4g34950 | Major facilitator superfamily protein                                                                   | 1.376  | 0.00013  |
| At4g36850 | PQ-loop repeat family protein / transmembrane family protein                                            | -1.182 | 0.00349  |
| At4g36950 | MAPKKK21 (mitogen-activated protein kinase kinase kinase 21); member of MEKK subfamily                  | -1.276 | 0.01922  |
| At4g37150 | ATMES9 (ARABIDOPSIS THALIANA METHYL ESTERASE 9); Encodes a protein shown to have c                      | -1.494 | 4.39E-05 |

|           |                                                                                                    |        |          |
|-----------|----------------------------------------------------------------------------------------------------|--------|----------|
| At4g37290 | unknown protein                                                                                    | 1.847  | 0.00051  |
| At5g01180 | ATPTR5 (ARABIDOPSIS THALIANA PEPTIDE TRANSPORTER 5); Encodes a dipeptide transport                 | 1.174  | 0.00011  |
| At5g01540 | LECRKA4.1 (lectin receptor kinase a4.1); Encodes LecRKA4.1, a member of the lectin receptor kinase | 1.191  | 0.00148  |
| At5g02190 | ATASP38 (ARABIDOPSIS THALIANA ASPARTIC PROTEASE 38); encodes an aspartic protease, l               | 1.391  | 1.31E-05 |
| At5g04340 | CZF2 (COLD INDUCED ZINC FINGER PROTEIN 2); putative c2h2 zinc finger transcription factor r        | 3.533  | 3.97E-08 |
| At5g04370 | NAMT1 (S-adenosyl-L-methionine-dependent methyltransferases superfamily protein); A member of t    | -1.336 | 6.23E-05 |
| At5g05250 | unknown protein                                                                                    | 1.093  | 0.0054   |
| At5g05290 | ATEXPA2 (expansin A2); Encodes an expansin. Naming convention from the Expansin Working Gro        | 1.253  | 0.00406  |
| At5g05410 | DREB2 (DEHYDRATION-RESPONSIVE ELEMENT BINDING PROTEIN 2); Encodes a transcriptic                   | 1.799  | 8.73E-05 |
| At5g06865 | other RNA; Potential natural antisense gene, locus overlaps with AT5G06860                         | -1.074 | 0.00172  |
| At5g08790 | anac081 (Arabidopsis NAC domain containing protein 81); induced by wounding, belongs to a large fi | 1.873  | 5.71E-06 |
| At5g09290 | Inositol monophosphatase family protein                                                            | -1.407 | 0.0147   |
| At5g10150 | Domain of unknown function (DUF966)                                                                | -1.144 | 0.0008   |
| At5g11670 | ATNADP-ME2 (Arabidopsis thaliana NADP-malic enzyme 2); The malic enzyme (EC 1.1.1.40) encoc        | 1.056  | 0.00021  |
| At5g12110 | Glutathione S-transferase, C-terminal-like                                                         | -1.029 | 0.00021  |
| At5g13220 | JAS1 (JASMONATE-ASSOCIATED 1); Plants overexpressing At5g13220.3, but not At5g13220.1 sh           | -1.948 | 0.0006   |
| At5g14730 | unknown protein                                                                                    | 1.294  | 1.14E-05 |
| At5g15310 | ATMYB16 (myb domain protein 16); Member of the R2R3 factor gene family.                            | -1.301 | 4.43E-05 |
| At5g15950 | Adenosylmethionine decarboxylase family protein                                                    | 1.441  | 3.84E-05 |
| At5g16960 | Zinc-binding dehydrogenase family protein                                                          | 1.208  | 4.41E-05 |
| At5g17350 | unknown protein                                                                                    | 1.426  | 0.0004   |
| At5g17490 | RGL3 (RGA-like protein 3); DELLA subfamily member involved in GA signal transduction               | -1.096 | 0.00013  |
| At5g19190 | unknown protein                                                                                    | -1.413 | 2.34E-05 |
| At5g20670 | Protein of unknown function (DUF1677)                                                              | -1.083 | 0.0005   |
| At5g21940 | unknown protein                                                                                    | -1.385 | 2.60E-05 |
| At5g22545 | unknown protein                                                                                    | -1.215 | 0.02022  |
| At5g22570 | ATWRKY38 (ARABIDOPSIS THALIANA WRKY DNA-BINDING PROTEIN 38); member of WRK                         | -2.357 | 0.0034   |
| At5g22920 | CHY-type/CTCHY-type/RING-type Zinc finger protein                                                  | -1.478 | 2.72E-05 |
| At5g23425 | NA                                                                                                 | -1.225 | 0.01489  |
| At5g24110 | ATWRKY30 (ARABIDOPSIS THALIANA WRKY DNA-BINDING PROTEIN 30); member of WRK                         | 1.288  | 0.0009   |
| At5g24150 | SQE5 (SQUALENE MONOOXYGENASE 5); squalene monooxygenase gene homolog                               | -1.173 | 0.00301  |
| At5g24155 | FAD/NAD(P)-binding oxidoreductase family protein                                                   | -1.236 | 0.00068  |
| At5g24470 | APRR5 (pseudo-response regulator 5); Encodes a pseudo-response regulator whose mutation affects va | 1.031  | 0.00603  |
| At5g24655 | LSU4 (RESPONSE TO LOW SULFUR 4)                                                                    | 1.164  | 0.00273  |
| At5g24660 | LSU2 (RESPONSE TO LOW SULFUR 2)                                                                    | 3.357  | 3.97E-08 |
| At5g25130 | CYP71B12 (cytochrome P450, family 71, subfamily B, polypeptide 12); putative cytochrome P450       | -1.265 | 0.00183  |
| At5g25930 | Protein kinase family protein with leucine-rich repeat domain                                      | 1.286  | 0.00011  |
| At5g26220 | ChaC-like family protein                                                                           | 3.225  | 1.19E-07 |
| At5g26690 | Heavy metal transport/detoxification superfamily protein                                           | -2.186 | 0.01655  |
| At5g27420 | CNI1 (carbon/nitrogen insensitive 1); Encodes CNI1 (Carbon/Nitrogen Insensitive1) (also named as A | 2.786  | 2.90E-06 |
| At5g28237 | Pyridoxal-5'-phosphate-dependent enzyme family protein                                             | -1.74  | 0.0002   |
| At5g28490 | LSH1 (LIGHT-DEPENDENT SHORT HYPOCOTYLS 1); Encodes a nuclear protein that mediates lig             | 1.091  | 0.00239  |
| At5g35735 | Auxin-responsive family protein                                                                    | 1.599  | 0.00039  |
| At5g39760 | AtHB23 (homeobox protein 23)                                                                       | 1.02   | 0.0002   |
| At5g41740 | Disease resistance protein (TIR-NBS-LRR class) family                                              | 1.492  | 0.0005   |
| At5g41750 | Disease resistance protein (TIR-NBS-LRR class) family                                              | 1.562  | 0.0041   |
| At5g42380 | CML37 (calmodulin like 37)                                                                         | 2.364  | 0.0046   |
| At5g42830 | HXXXD-type acyl-transferase family protein                                                         | -1.232 | 0.00102  |
| At5g44060 | unknown protein                                                                                    | 1.663  | 4.18E-05 |
| At5g44380 | FAD-binding Berberine family protein                                                               | 1.13   | 0.005    |
| At5g44680 | DNA glycosylase superfamily protein                                                                | -1.197 | 0.00054  |
| At5g44910 | Toll-Interleukin-Resistance (TIR) domain family protein                                            | 1.147  | 0.00779  |
| At5g45000 | Disease resistance protein (TIR-NBS-LRR class) family                                              | -1.134 | 0.01495  |
| At5g45340 | CYP707A3 (cytochrome P450, family 707, subfamily A, polypeptide 3); Encodes a protein with ABA     | 2.344  | 2.67E-05 |
| At5g46295 | unknown protein                                                                                    | 2.576  | 2.90E-06 |
| At5g46780 | VQ motif-containing protein                                                                        | 1.059  | 0.0004   |
| At5g47230 | ATERF-5 (ETHYLENE RESPONSIVE ELEMENT BINDING FACTOR- 5); encodes a member of the                   | 3.01   | 1.29E-05 |
| At5g47960 | ATRABA4C (RAB GTPase homolog A4C); Encodes a small molecular weight g-protein.                     | 1.295  | 0.00074  |
| At5g48430 | Eukaryotic aspartyl protease family protein                                                        | 1.177  | 0.01667  |
| At5g48490 | Bifunctional inhibitor/lipid-transfer protein/seed storage 2S albumin superfamily protein          | -1.276 | 0.00041  |
| At5g48540 | receptor-like protein kinase-related family protein                                                | 1.623  | 0.00021  |
| At5g48850 | ATSDI1 (SULPHUR DEFICIENCY-INDUCED 1); homologous to the wheat sulphate deficiency-indu            | 3.632  | 1.31E-05 |
| At5g49360 | ATBXL1 (BETA-XYLOSIDASE 1); Encodes a bifunctional {beta}-D-xylosidase/{alpha}-L-arabinofu         | -1.539 | 0.0049   |
| At5g49480 | ATCP1 (Ca2+-binding protein 1); AtCP1 encodes a novel Ca2+-binding protein, which shares sequenc   | 1.032  | 0.00084  |
| At5g50915 | basic helix-loop-helix (bHLH) DNA-binding superfamily protein                                      | -1.351 | 0.0008   |
| At5g51190 | Integrase-type DNA-binding superfamily protein; encodes a member of the ERF (ethylene response fac | 2.603  | 0.0004   |
| At5g52120 | AtPP2-A14 (phloem protein 2-A14)                                                                   | -1.045 | 0.00012  |

|           |                                                                                                      |        |          |
|-----------|------------------------------------------------------------------------------------------------------|--------|----------|
| At5g52390 | PAR1 protein                                                                                         | -1.379 | 0.02084  |
| At5g52415 | pseudogene, hypothetical protein                                                                     | 1.024  | 0.00492  |
| At5g52860 | ABC-2 type transporter family protein                                                                | 1.256  | 0.00188  |
| At5g54165 | unknown protein                                                                                      | 2.365  | 1.72E-05 |
| At5g54470 | B-box type zinc finger family protein                                                                | 1.048  | 0.00372  |
| At5g54490 | PBP1 (pinoid-binding protein 1); Encodes a PINOID (PID)-binding protein containing putative EF-har   | 2.525  | 2.90E-06 |
| At5g54585 | unknown protein                                                                                      | -1.264 | 0.00075  |
| At5g54610 | ANK (ankyrin); Induced in response to Salicylic acid. Belongs to the ankyrin repeat protein family.  | -2.172 | 0.00927  |
| At5g54720 | Ankyrin repeat family protein                                                                        | 2.182  | 5.38E-05 |
| At5g56100 | glycine-rich protein / oleosin                                                                       | -1.507 | 0.00027  |
| At5g56550 | ATOXS3 (OXIDATIVE STRESS 3); Encodes OXIDATIVE STRESS 3 (OXS3)&#65292; involved in                   | -1.512 | 6.48E-06 |
| At5g56880 | unknown protein                                                                                      | -1.08  | 0.0017   |
| At5g57785 | unknown protein                                                                                      | -1.213 | 0.00024  |
| At5g58770 | Undecaprenyl pyrophosphate synthetase family protein                                                 | -1.487 | 0.00031  |
| At5g59220 | HAI1 (highly ABA-induced PP2C gene 1)                                                                | -1.235 | 9.25E-05 |
| At5g59580 | UGT76E1 (UDP-glucosyl transferase 76E1)                                                              | -1.298 | 0.00267  |
| At5g59820 | RHL41 (RESPONSIVE TO HIGH LIGHT 41); Encodes a zinc finger protein involved in high light an         | 1.933  | 0.00122  |
| At5g60900 | RLK1 (receptor-like protein kinase 1); Encodes a receptor-like protein kinase.                       | -1.166 | 0.03562  |
| At5g61160 | AACT1 (anthocyanin 5-aromatic acyltransferase 1)                                                     | 1.641  | 0.00126  |
| At5g61440 | ACHT5 (atypical CYS HIS rich thioredoxin 5); Encodes a member of the thioredoxin family protein.     | -1.249 | 0.0127   |
| At5g61600 | ERF104 (ethylene response factor 104); encodes a member of the ERF (ethylene response factor) subfa  | 2.608  | 2.90E-06 |
| At5g63130 | Octicosapeptide/Phox/Bem1p family protein                                                            | 1.677  | 3.34E-05 |
| At5g63135 | unknown protein                                                                                      | -2.589 | 0.0465   |
| At5g63450 | CYP94B1 (cytochrome P450, family 94, subfamily B, polypeptide 1); member of CYP94B                   | -1.687 | 0.00109  |
| At5g63790 | ANAC102 (NAC domain containing protein 102); Encodes a member of the NAC family of transcripti       | 2.013  | 5.06E-08 |
| At5g64120 | Peroxidase superfamily protein; encodes a cell wall bound peroxidase that is induced by hypo-osmolar | 1.465  | 0.04121  |
| At5g64190 | unknown protein                                                                                      | -1.205 | 0.0039   |
| At5g65207 | unknown protein                                                                                      | -1.214 | 0.00037  |
| At5g66650 | Protein of unknown function (DUF607)                                                                 | 1.07   | 0.0178   |
| At5g67060 | HEC1 (HECATE 1)                                                                                      | 1.079  | 0.00385  |
| At5g67190 | DEAR2 (DREB and EAR motif protein 2); encodes a member of the DREB subfamily A-5 of ERF/AP           | -1.2   | 3.90E-05 |



**List of genes significantly affected (P<0.05 and log2≥1 or ≤-1) by allyl-ITC after 1h**

| <b>Locus ID</b> | <b>gene description (TAIR)</b>                                                                                                                   | <b>log2 ITC/mock 1h</b> | <b>adj.P.Val</b> |
|-----------------|--------------------------------------------------------------------------------------------------------------------------------------------------|-------------------------|------------------|
| At1g01340       | ATCNGC10 (cyclic nucleotide gated channel 10); member of Cyclic nucleotide gated channel family                                                  | 1.287                   | 6.67E-05         |
| At1g01420       | UGT72B3 (UDP-glucosyl transferase 72B3)                                                                                                          | -1.328                  | 7.00E-07         |
| At1g01480       | ACS2 (1-amino-cyclopropane-1-carboxylate synthase 2); a member of the 1-aminocyclopropane-1-carboxylate synthase family                          | 1.061                   | 0.02915          |
| At1g01560       | ATMPK11 (MAP kinase 11); member of MAP Kinase                                                                                                    | 3.246                   | 1.04E-05         |
| At1g01720       | ANAC002 (Arabidopsis NAC domain containing protein 2); Belongs to a large family of putative transcription factors                               | 1.703                   | 2.43E-07         |
| At1g01940       | Cyclophilin-like peptidyl-prolyl cis-trans isomerase family protein                                                                              | 1.065                   | 0.00078          |
| At1g02090       | ATCSN7 (ARABIDOPSIS THALIANA COP9 SIGNALOSOME SUBUNIT 7); encodes a phosphoprotein                                                               | 1.487                   | 1.01E-05         |
| At1g02230       | ANAC004 (NAC domain containing protein 4)                                                                                                        | 1.643                   | 0.00083          |
| At1g02360       | Chitinase family protein                                                                                                                         | 1.226                   | 1.12E-05         |
| At1g02400       | ATGA2OX4 (Arabidopsis thaliana gibberellin 2-oxidase 4); Encodes a gibberellin 2-oxidase that acts on gibberellin                                | 3.562                   | 5.54E-10         |
| At1g02450       | NIMIN1 (NIM1-interacting 1); NIMIN1 modulates PR gene expression according the following model: PR1<sup>+</sup>NIMIN1<sup>-</sup>PR1<sup>-</sup> | 1.26                    | 0.02078          |
| At1g02700       | unknown protein                                                                                                                                  | 2.182                   | 1.96E-09         |
| At1g03070       | Bax inhibitor-1 family protein                                                                                                                   | 6.239                   | 7.97E-12         |
| At1g03220       | Eukaryotic aspartyl protease family protein                                                                                                      | 2.386                   | 8.17E-09         |
| At1g03230       | Eukaryotic aspartyl protease family protein                                                                                                      | 2.049                   | 3.15E-09         |
| At1g03300       | ATDUF1 (DOMAIN OF UNKNOWN FUNCTION 724 1); Member of the plant-specific DUF724 protein family                                                    | -1.166                  | 4.91E-06         |
| At1g03730       | unknown protein                                                                                                                                  | 1.074                   | 0.0078           |
| At1g03740       | Protein kinase superfamily protein                                                                                                               | 1.94                    | 3.19E-09         |
| At1g03905       | P-loop containing nucleoside triphosphate hydrolases superfamily protein                                                                         | 1.226                   | 1.28E-06         |
| At1g04000       | unknown protein                                                                                                                                  | 1.633                   | 1.97E-06         |
| At1g04490       | Protein of unknown function (DUF3527)                                                                                                            | 1.179                   | 0.00017          |
| At1g04570       | Major facilitator superfamily protein                                                                                                            | 4.242                   | 2.29E-10         |
| At1g04770       | Tetratricopeptide repeat (TPR)-like superfamily protein                                                                                          | 3.377                   | 4.91E-11         |
| At1g05100       | MAPKKK18 (mitogen-activated protein kinase kinase kinase 18); member of MEKK subfamily                                                           | 1.442                   | 5.15E-07         |
| At1g05170       | Galactosyltransferase family protein                                                                                                             | 1.231                   | 9.60E-07         |
| At1g05250       | Peroxidase superfamily protein                                                                                                                   | 1.63                    | 0.0059           |
| At1g05420       | ATOPF12 (ARABIDOPSIS THALIANA OVATE FAMILY PROTEIN 12)                                                                                           | -1.121                  | 3.38E-05         |
| At1g05575       | unknown protein                                                                                                                                  | 4.157                   | 8.71E-11         |
| At1g05670       | Pentatricopeptide repeat (PPR-like) superfamily protein                                                                                          | 1.552                   | 2.08E-07         |
| At1g05680       | UGT74E2 (Uridine diphosphate glycosyltransferase 74E2); Encodes a UDP-glucosyltransferase, UGT74E2                                               | 2.139                   | 0.00021          |
| At1g05700       | Leucine-rich repeat transmembrane protein kinase protein                                                                                         | 2.112                   | 3.31E-06         |
| At1g06540       | unknown protein                                                                                                                                  | -1.046                  | 2.98E-06         |
| At1g06870       | Peptidase S24/S26A/S26B/S26C family protein                                                                                                      | 1.274                   | 1.49E-07         |
| At1g06980       | unknown protein                                                                                                                                  | -1.222                  | 2.19E-05         |
| At1g07000       | ATEXO70B2 (exocyst subunit exo70 family protein B2); A member of EXO70 gene family, putative exocyst subunit                                     | 2.161                   | 1.16E-06         |
| At1g07135       | glycine-rich protein                                                                                                                             | 5.307                   | 9.29E-08         |
| At1g07160       | Protein phosphatase 2C family protein                                                                                                            | 5.156                   | 5.61E-10         |
| At1g07190       | BEST Arabidopsis thaliana protein match is: lon protease 1 (TAIR:AT5G26860.1)                                                                    | 1.026                   | 1.83E-07         |
| At1g07330       | unknown protein                                                                                                                                  | 3.5                     | 3.94E-10         |
| At1g07350       | RNA-binding (RRM/RBD/RNP motifs) family protein                                                                                                  | 2.646                   | 4.21E-10         |
| At1g07400       | HSP20-like chaperones superfamily protein                                                                                                        | 4.644                   | 8.76E-09         |
| At1g07410       | ATRAB-A2B (ARABIDOPSIS RAB GTPASE HOMOLOG A2B)                                                                                                   | 1.063                   | 5.68E-06         |
| At1g07500       | unknown protein                                                                                                                                  | 4.334                   | 1.00E-10         |
| At1g07520       | GRAS family transcription factor                                                                                                                 | 2.456                   | 2.30E-08         |
| At1g07720       | KCS3 (3-ketoacyl-CoA synthase 3); Encodes KCS3, a member of the 3-ketoacyl-CoA synthase family in Arabidopsis                                    | -1.068                  | 1.18E-05         |
| At1g07900       | LBD1 (LOB domain-containing protein 1)                                                                                                           | 2.846                   | 1.17E-06         |
| At1g08105       | hAT-like transposase family (hobo/Ac/Tam3), has a 1.0e-298 P-value blast match to GB:AAD24567 transposon                                         | 1.713                   | 9.07E-08         |
| At1g08860       | BON3 (BONZAI 3); Encodes a copine-like protein, which is a member of a newly identified class of calcium-binding proteins                        | 1.637                   | 0.00017          |
| At1g08930       | ERD6 (EARLY RESPONSE TO DEHYDRATION 6); encodes a putative sucrose transporter whose gene expression is induced by dehydration                   | 2.172                   | 2.34E-09         |
| At1g08940       | Phosphoglycerate mutase family protein                                                                                                           | 2.123                   | 5.34E-09         |
| At1g09070       | (AT)SRC2 (SOYBEAN GENE REGULATED BY COLD-2); SRC2 specifically binds the peptide PIEP                                                            | 1.622                   | 9.17E-07         |
| At1g09140       | ATSRP30 (SERINE-ARGININE PROTEIN 30); Encodes a serine-arginine rich RNA binding protein involved in stress response                             | 1.189                   | 6.07E-06         |
| At1g09240       | ATNAS3 (ARABIDOPSIS THALIANA NICOTIANAMINE SYNTHASE 3); Encodes a nicotianamine synthase                                                         | -1.349                  | 0.01974          |
| At1g09932       | Phosphoglycerate mutase family protein                                                                                                           | 2.235                   | 0.0002           |
| At1g09940       | HEMA2 (Glutamyl-tRNA reductase family protein); Encodes glutamyl-tRNA reductase. Involved in hemoglobin synthesis                                | 2.276                   | 2.38E-09         |
| At1g09970       | RLK7 (receptor-like kinase 7); RLK7 belongs to a leucine-rich repeat class of receptor-like kinase (LRR-RLK)                                     | 1.303                   | 4.94E-07         |
| At1g10040       | alpha/beta-Hydrolases superfamily protein                                                                                                        | 3.485                   | 5.55E-11         |
| At1g10050       | glycosyl hydrolase family 10 protein / carbohydrate-binding domain-containing protein; Encodes a putative alpha-D-glucosylase                    | 2.758                   | 4.63E-10         |
| At1g10990       | unknown protein                                                                                                                                  | 1.074                   | 0.00013          |
| At1g11050       | Protein kinase superfamily protein                                                                                                               | 3.144                   | 8.51E-10         |
| At1g11055       | Encodes a defensin-like (DEFL) family protein.; Encodes a defensin-like (DEFL) family protein.                                                   | 1.04                    | 4.88E-07         |
| At1g11100       | SNF2 domain-containing protein / helicase domain-containing protein / zinc finger protein-related                                                | 2.361                   | 2.20E-09         |
| At1g11540       | Sulfite exporter TauE/SafE family protein                                                                                                        | -1.905                  | 7.86E-10         |
| At1g11660       | heat shock protein 70 (Hsp 70) family protein                                                                                                    | 1.244                   | 3.25E-07         |
| At1g11803       | pseudogene, auxin responsive protein, blastp match of 74% identity and 1.2e-15 P-value to GP 3043536                                             | -2.764                  | 1.66E-08         |



|           |                                                                                                         |        |          |
|-----------|---------------------------------------------------------------------------------------------------------|--------|----------|
| At1g12030 | Protein of unknown function (DUF506)                                                                    | 4.593  | 3.87E-07 |
| At1g12060 | ATBAG5 (BCL-2-associated athanogene 5); A member of Arabidopsis BAG (Bcl-2-associated athanog           | 1.794  | 3.95E-08 |
| At1g12064 | unknown protein                                                                                         | 1.086  | 0.0018   |
| At1g12294 | MIR472A (microRNA472A); Encodes a microRNA that targets several CC-NBS-LRR family members               | 1.265  | 8.30E-08 |
| At1g12740 | CYP87A2 (cytochrome P450, family 87, subfamily A, polypeptide 2); encodes a protein with cytochron      | 1.716  | 5.10E-08 |
| At1g13210 | ACA.I (autoinhibited Ca <sup>2+</sup> /ATPase II)                                                       | 2.903  | 7.96E-09 |
| At1g13245 | DVL4 (DEVIL 4)                                                                                          | -1.358 | 3.34E-07 |
| At1g13300 | HRS1 (HYPERSENSITIVITY TO LOW PI-ELICITED PRIMARY ROOT SHORTENING 1); Overexp                           | -1.244 | 0.02539  |
| At1g13340 | Regulator of Vps4 activity in the MVB pathway protein                                                   | 1.496  | 0.0257   |
| At1g13600 | AtbZIP58 (basic leucine-zipper 58)                                                                      | -1.889 | 0.0082   |
| At1g13620 | RGF2 (root meristem growth factor 2); Encodes a root meristem growth factor (RGF). Belongs to a fan     | 1.556  | 1.54E-07 |
| At1g14040 | EXS (ERD1/XPR1/SYG1) family protein                                                                     | 1.222  | 4.91E-06 |
| At1g14070 | FUT7 (fucosyltransferase 7); member of Xyloglucan fucosyltransferase family                             | 1.523  | 3.56E-06 |
| At1g14200 | RING/U-box superfamily protein                                                                          | 4.038  | 1.54E-10 |
| At1g14205 | Ribosomal L18p/L5e family protein                                                                       | 2.072  | 6.63E-06 |
| At1g14260 | RING/FYVE/PHD zinc finger superfamily protein                                                           | 1.076  | 1.86E-06 |
| At1g14370 | APK2A (protein kinase 2A); Encodes protein kinase APK2a.                                                | 3.115  | 1.36E-09 |
| At1g14420 | AT59 (Pectate lyase family protein)                                                                     | 1.205  | 2.23E-07 |
| At1g14480 | Ankyrin repeat family protein                                                                           | 2.723  | 2.52E-09 |
| At1g14540 | Peroxidase superfamily protein                                                                          | 4.865  | 3.30E-09 |
| At1g14600 | Homeodomain-like superfamily protein                                                                    | -1.112 | 2.31E-06 |
| At1g14640 | SWAP (Suppressor-of-White-APricot)/surp domain-containing protein                                       | 1.423  | 5.91E-07 |
| At1g14870 | PCR2 (PLANT CADMIUM RESISTANCE 2)                                                                       | 1.489  | 0.0065   |
| At1g15190 | Fasciclin-like arabinogalactan family protein                                                           | 2      | 1.64E-07 |
| At1g15240 | Phox-associated domain                                                                                  | 1.058  | 1.68E-06 |
| At1g15430 | Protein of unknown function (DUF1644)                                                                   | 2.461  | 1.40E-09 |
| At1g15520 | ABCG40 (ATP-BINDING CASSETTE FAMILY G40); ABC transporter family involved in ABA trans                  | 3.189  | 0.00933  |
| At1g15530 | Concanavalin A-like lectin protein kinase family protein                                                | 1.505  | 3.84E-08 |
| At1g15540 | 2-oxoglutarate (2OG) and Fe(II)-dependent oxygenase superfamily protein                                 | 1.637  | 5.17E-05 |
| At1g15550 | ATGA3OX1 (ARABIDOPSIS THALIANA GIBBERELLIN 3 BETA-HYDROXYLASE 1); Involved ir                           | -1.618 | 6.78E-07 |
| At1g15890 | Disease resistance protein (CC-NBS-LRR class) family                                                    | 1.621  | 2.71E-08 |
| At1g16000 | unknown protein                                                                                         | -1.027 | 0.00832  |
| At1g16030 | Hsp70b (heat shock protein 70B)                                                                         | 5.459  | 1.56E-11 |
| At1g16040 | FUNCTIONS IN: molecular_function unknown; INVOLVED IN: GPI anchor biosynthetic process; LOC             | 1.183  | 1.75E-06 |
| At1g16090 | WAKL7 (wall associated kinase-like 7); WAK-like kinase                                                  | 1.155  | 0.00054  |
| At1g16110 | WAKL6 (wall associated kinase-like 6); WAK-like kinase                                                  | 1.867  | 4.88E-07 |
| At1g16130 | WAKL2 (wall associated kinase-like 2); wall-associated kinase like                                      | 3.505  | 6.88E-09 |
| At1g16150 | WAKL4 (wall associated kinase-like 4); Encodes a cell-wall associated kinase like protein of the recept | 1.152  | 0.00021  |
| At1g16420 | ATMC8 (ARABIDOPSIS THALIANA METACASPASE 8); Encodes a metacaspase (cysteine-type end                    | 5.092  | 2.41E-07 |
| At1g16640 | AP2/B3-like transcriptional factor family protein                                                       | 1.179  | 2.39E-06 |
| At1g16670 | Protein kinase superfamily protein                                                                      | 1.269  | 6.29E-07 |
| At1g16930 | F-box/RNI-like/FBD-like domains-containing protein                                                      | 1.17   | 1.03E-05 |
| At1g17147 | VQ motif-containing protein                                                                             | 2.241  | 4.12E-06 |
| At1g17380 | JAZ5 (jasmonate-zim-domain protein 5)                                                                   | 1.076  | 0.0383   |
| At1g17420 | LOX3 (lipoxygenase 3); Lipoxygenase                                                                     | 1.691  | 6.38E-05 |
| At1g17600 | Disease resistance protein (TIR-NBS-LRR class) family                                                   | 1.838  | 2.44E-09 |
| At1g17610 | Disease resistance protein (TIR-NBS class)                                                              | 1.025  | 6.05E-05 |
| At1g17750 | AtPEPR2 (PEP1 RECEPTOR 2); Encodes PEPR2, a plasma membrane leucine-rich repeat receptor kin            | 1.524  | 2.83E-08 |
| At1g17860 | Kunitz family trypsin and protease inhibitor protein                                                    | 1.209  | 0.0002   |
| At1g17870 | ATEGY3 (ETHYLENE-DEPENDENT GRAVITROPISM-DEFICIENT AND YELLOW-GREEN-LIKE                                 | 3.497  | 1.21E-09 |
| At1g18075 | MIR159 (MICRORNA 159); Encodes a microRNA that targets several MYB family members. MicroRl              | 1.055  | 1.98E-06 |
| At1g18300 | atnudt4 (nudix hydrolase homolog 4)                                                                     | 2.506  | 7.86E-10 |
| At1g18330 | EPR1 (EARLY-PHYTOCHROME-RESPONSIVE1); EARLY-PHYTOCHROME-RESPONSIVE1                                     | 1.8    | 1.07E-08 |
| At1g18380 | NA                                                                                                      | 3.344  | 5.55E-11 |
| At1g18382 | other RNA; Potential natural antisense gene, locus overlaps with AT1G18380                              | 1.285  | 9.68E-09 |
| At1g18390 | Protein kinase superfamily protein                                                                      | 2.903  | 1.53E-10 |
| At1g18570 | AtMYB51 (myb domain protein 51); Encodes a member of the R2R3-MYB transcription family. Involv          | 2.502  | 1.42E-07 |
| At1g18740 | Protein of unknown function (DUF793)                                                                    | 1.513  | 8.08E-07 |
| At1g18810 | phytochrome kinase substrate-related                                                                    | -1.264 | 4.01E-05 |
| At1g18890 | ATCDPK1 (calcium-dependent protein kinase 1); encodes a calcium-dependent protein kinase whose g        | 1.472  | 1.95E-07 |
| At1g19020 | unknown protein                                                                                         | 4.662  | 2.31E-09 |
| At1g19180 | JAZ1 (jasmonate-zim-domain protein 1); JAZ1 is a nuclear-localized protein involved in jasmonate sig    | 2.623  | 1.28E-06 |
| At1g19210 | Integrase-type DNA-binding superfamily protein; encodes a member of the DREB subfamily A-5 of ER        | 2.857  | 9.68E-09 |
| At1g19320 | Pathogenesis-related thaumatin superfamily protein                                                      | 1.947  | 2.63E-06 |
| At1g19380 | Protein of unknown function (DUF1195)                                                                   | 1.207  | 0.00147  |
| At1g19620 | unknown protein                                                                                         | -1.633 | 1.32E-05 |
| At1g19770 | ATPUP14 (purine permease 14); Member of a family of proteins related to PUP1, a purine transporter. I   | 2.038  | 1.97E-07 |

|           |                                                                                                            |        |          |
|-----------|------------------------------------------------------------------------------------------------------------|--------|----------|
| At1g20070 | unknown protein                                                                                            | -2.164 | 7.71E-08 |
| At1g20310 | unknown protein                                                                                            | 4.955  | 8.27E-10 |
| At1g20350 | ATTIM17-1 (translocase inner membrane subunit 17-1); mitochondrial inner membrane translocase              | 1.486  | 8.75E-06 |
| At1g20470 | SAUR-like auxin-responsive protein family                                                                  | -1.689 | 3.72E-06 |
| At1g20510 | OPCL1 (OPC-8:0 CoA ligase1)                                                                                | 1.722  | 1.27E-06 |
| At1g20520 | Arabidopsis protein of unknown function (DUF241)                                                           | 1.434  | 3.08E-07 |
| At1g20640 | Plant regulator RWP-RK family protein                                                                      | 2.487  | 1.06E-09 |
| At1g20823 | RING/U-box superfamily protein                                                                             | 3.033  | 7.26E-07 |
| At1g21010 | unknown protein                                                                                            | 2.869  | 1.51E-09 |
| At1g21110 | O-methyltransferase family protein                                                                         | 3.12   | 4.23E-07 |
| At1g21120 | O-methyltransferase family protein                                                                         | 3.088  | 7.12E-09 |
| At1g21130 | O-methyltransferase family protein                                                                         | 2.492  | 1.41E-08 |
| At1g21326 | VQ motif-containing protein                                                                                | 2.352  | 5.89E-08 |
| At1g21460 | Nodulin MtN3 family protein                                                                                | -1.002 | 2.04E-06 |
| At1g21550 | Calcium-binding EF-hand family protein                                                                     | 6.469  | 4.01E-11 |
| At1g22280 | PAPP2C (phytochrome-associated protein phosphatase type 2C); Encodes a phytochrome-associated pr           | 1.425  | 2.39E-07 |
| At1g22340 | AtUGT85A7 (UDP-glucosyl transferase 85A7)                                                                  | -1.009 | 3.99E-05 |
| At1g22470 | unknown protein                                                                                            | 2.736  | 1.59E-06 |
| At1g22500 | RING/U-box superfamily protein                                                                             | -1.393 | 0.00086  |
| At1g22640 | ATMYB3 (ARABIDOPSIS THALIANA MYB DOMAIN PROTEIN 3); MYB-type transcription factor                          | -1.25  | 4.68E-07 |
| At1g22810 | Integrase-type DNA-binding superfamily protein; encodes a member of the DREB subfamily A-5 of ER           | 6.88   | 2.24E-12 |
| At1g23180 | ARM repeat superfamily protein                                                                             | 1.239  | 1.21E-07 |
| At1g23340 | Protein of Unknown Function (DUF239)                                                                       | -1.423 | 0.00041  |
| At1g23390 | Kelch repeat-containing F-box family protein                                                               | -1.137 | 0.0001   |
| At1g23550 | similar to RCD one 2 (SRO2); FUNCTIONS IN: NAD+ ADP-ribosyltransferase activity; INVOLVED I                | 2.01   | 5.78E-08 |
| At1g23710 | Protein of unknown function (DUF1645)                                                                      | 2.908  | 2.65E-08 |
| At1g23830 | unknown protein                                                                                            | 2.065  | 3.05E-09 |
| At1g24130 | Transducin/WD40 repeat-like superfamily protein                                                            | 1.753  | 2.05E-07 |
| At1g24140 | Matrixin family protein                                                                                    | 5.081  | 5.84E-08 |
| At1g24145 | unknown protein                                                                                            | 2.455  | 1.86E-05 |
| At1g24150 | ATFH4 (FORMIN HOMOLOGUE 4); Encodes a group I formin. Localized to cell junctions. Polymeriz               | 2.762  | 2.83E-08 |
| At1g24260 | AGL9 (AGAMOUS-like 9); Member of the MADs box transcription factor family. SEP3 is redundant w             | -1.313 | 0.0098   |
| At1g24577 | unknown protein                                                                                            | -1.737 | 1.75E-06 |
| At1g24580 | RING/U-box superfamily protein                                                                             | -3.354 | 0.02009  |
| At1g24909 | Glutamine amidotransferase type 1 family protein                                                           | 1.303  | 2.01E-05 |
| At1g25390 | Protein kinase superfamily protein                                                                         | 1.407  | 4.55E-08 |
| At1g25400 | unknown protein                                                                                            | 2.172  | 1.21E-06 |
| At1g25440 | B-box type zinc finger protein with CCT domain                                                             | -1.822 | 3.40E-06 |
| At1g26420 | FAD-binding Berberine family protein                                                                       | 1.161  | 0.00071  |
| At1g26600 | CLE9 (CLAVATA3/ESR-RELATED 9); Member of a large family of putative ligands homologous to th               | -1.572 | 2.82E-08 |
| At1g26762 | unknown protein                                                                                            | -1.043 | 2.90E-05 |
| At1g26770 | AT-EXP10 (ARABIDOPSIS THALIANA EXPANSIN 10); Encodes an expansin. Naming convention f                      | -1.025 | 4.61E-05 |
| At1g26800 | RING/U-box superfamily protein                                                                             | 3.885  | 2.05E-10 |
| At1g26920 | unknown protein                                                                                            | -1.418 | 5.73E-06 |
| At1g27100 | Actin cross-linking protein                                                                                | 1.844  | 7.65E-08 |
| At1g27170 | transmembrane receptors                                                                                    | 1.51   | 3.13E-08 |
| At1g27720 | TAF4 (TBP-associated factor 4)                                                                             | 1.89   | 1.18E-08 |
| At1g27730 | STZ (salt tolerance zinc finger); Related to Cys2/His2-type zinc-finger proteins found in higher plants. C | 5.915  | 5.49E-11 |
| At1g27770 | ACA1 (autoinhibited Ca2+-ATPase 1); Encodes a chloroplast envelope Ca2+-ATPase with an N-termin            | 2.289  | 1.74E-08 |
| At1g27820 | Polynucleotidyl transferase, ribonuclease H-like superfamily protein                                       | 4.265  | 1.09E-10 |
| At1g27890 | Polynucleotidyl transferase, ribonuclease H-like superfamily protein                                       | 4.531  | 4.89E-11 |
| At1g28160 | Integrase-type DNA-binding superfamily protein; encodes a member of the ERF (ethylene response fact        | -1.252 | 0.0034   |
| At1g28190 | unknown protein                                                                                            | 3.104  | 1.14E-10 |
| At1g28280 | VQ motif-containing protein                                                                                | 1.114  | 2.39E-05 |
| At1g28310 | Dof-type zinc finger DNA-binding family protein                                                            | -1.148 | 2.67E-07 |
| At1g28370 | ATERF11 (ERF DOMAIN PROTEIN 11); encodes a member of the ERF (ethylene response factor) sub                | 3.184  | 2.95E-09 |
| At1g28380 | NSL1 (necrotic spotted lesions 1); This gene is predicted to encode a protein involved in negatively reg   | 1.946  | 8.53E-08 |
| At1g28480 | GRX480 (Thioredoxin superfamily protein); Encodes GRX480, a member of the glutaredoxin family th           | 2.576  | 0.0058   |
| At1g29290 | unknown protein                                                                                            | 1.173  | 1.95E-05 |
| At1g29340 | ATPUB17 (ARABIDOPSIS THALIANA PLANT U-BOX 17); Encodes a protein containing a UND, a                       | 1.808  | 1.04E-07 |
| At1g29420 | SAUR-like auxin-responsive protein family                                                                  | -1.9   | 1.25E-08 |
| At1g29430 | SAUR-like auxin-responsive protein family                                                                  | -2.864 | 3.08E-09 |
| At1g29440 | SAUR-like auxin-responsive protein family                                                                  | -3.517 | 8.96E-09 |
| At1g29450 | SAUR-like auxin-responsive protein family                                                                  | -3.261 | 3.61E-08 |
| At1g29460 | SAUR-like auxin-responsive protein family                                                                  | -3.772 | 1.45E-10 |
| At1g29500 | SAUR-like auxin-responsive protein family                                                                  | -3.296 | 2.07E-09 |
| At1g29510 | SAUR68 (SMALL AUXIN UPREGULATED 68)                                                                        | -2.957 | 3.77E-09 |

|           |                                                                                                         |        |          |
|-----------|---------------------------------------------------------------------------------------------------------|--------|----------|
| At1g29680 | Protein of unknown function (DUF1264)                                                                   | 1.117  | 9.03E-06 |
| At1g29690 | CAD1 (constitutively activated cell death 1); Encodes a protein containing a domain with significant ho | 3.235  | 3.14E-10 |
| At1g30040 | ATGA2OX2 (gibberellin 2-oxidase); Encodes a gibberellin 2-oxidase that acts on C-19 gibberellins. At    | 1.225  | 0.0131   |
| At1g30070 | SGS domain-containing protein                                                                           | 3.048  | 2.27E-09 |
| At1g30190 | unknown protein                                                                                         | 2.712  | 1.92E-10 |
| At1g30370 | alpha/beta-Hydrolases superfamily protein                                                               | 6.077  | 4.28E-07 |
| At1g30700 | FAD-binding Berberine family protein                                                                    | 2.686  | 6.73E-05 |
| At1g30730 | FAD-binding Berberine family protein                                                                    | 1.958  | 6.57E-08 |
| At1g30755 | Protein of unknown function (DUF668)                                                                    | 2.7    | 1.49E-10 |
| At1g30810 | Transcription factor jumonji (jmj) family protein / zinc finger (C5HC2 type) family protein             | 1.254  | 5.09E-06 |
| At1g30870 | Peroxidase superfamily protein                                                                          | 1.725  | 0.01081  |
| At1g31130 | unknown protein                                                                                         | 1.792  | 5.33E-07 |
| At1g31280 | AGO2 (argonaute 2); An Argonaute gene                                                                   | 2.056  | 1.45E-08 |
| At1g31290 | AGO3 (ARGONAUTE 3)                                                                                      | 2.28   | 2.74E-07 |
| At1g31370 | Ubiquitin-specific protease family C19-related protein                                                  | 1.434  | 1.36E-07 |
| At1g31490 | HXXXD-type acyl-transferase family protein                                                              | -1.019 | 0.00119  |
| At1g31540 | Disease resistance protein (TIR-NBS-LRR class) family                                                   | 1.345  | 1.40E-05 |
| At1g32330 | ATHSFA1D (heat shock transcription factor A1D); Member of Heat Stress Transcription Factor (Hsf) f      | 1.303  | 7.29E-07 |
| At1g32640 | JAI1 (JASMONATE INSENSITIVE 1); Encodes a MYC-related transcriptional activator with a typical          | 1.703  | 4.53E-05 |
| At1g32740 | SBP (S-ribonuclease binding protein) family protein                                                     | -1.059 | 1.78E-06 |
| At1g32920 | unknown protein                                                                                         | 3.061  | 9.83E-09 |
| At1g32928 | unknown protein                                                                                         | 2.909  | 3.77E-09 |
| At1g32960 | SBT3.3 (Subtilase family protein)                                                                       | 2.866  | 4.90E-07 |
| At1g32970 | Subtilisin-like serine endopeptidase family protein                                                     | 2.103  | 1.28E-06 |
| At1g33030 | O-methyltransferase family protein                                                                      | 1.049  | 0.00351  |
| At1g33055 | unknown protein                                                                                         | -1.446 | 0.02273  |
| At1g33430 | Galactosyltransferase family protein                                                                    | 1.019  | 3.80E-05 |
| At1g33500 | unknown protein                                                                                         | 1.019  | 1.71E-05 |
| At1g33560 | ADR1 (ACTIVATED DISEASE RESISTANCE 1); Encodes a NBS-LRR disease resistance protein tha                 | 1.137  | 0.00017  |
| At1g33610 | Leucine-rich repeat (LRR) family protein                                                                | 1.633  | 5.56E-06 |
| At1g33670 | Leucine-rich repeat (LRR) family protein                                                                | 1.133  | 1.60E-05 |
| At1g33760 | Integrase-type DNA-binding superfamily protein; encodes a member of the DREB subfamily A-4 of ER        | 3.003  | 2.09E-05 |
| At1g33770 | Protein kinase superfamily protein                                                                      | 1.4    | 2.90E-05 |
| At1g33855 | MuDr-element domain (Mutator-like transposase family, has a 1.7e-18 P-value blast match to Q9SKL7       | 2.307  | 1.64E-06 |
| At1g34042 | unknown protein                                                                                         | 1.352  | 4.50E-06 |
| At1g34420 | leucine-rich repeat transmembrane protein kinase family protein                                         | 1.238  | 0.00023  |
| At1g35140 | EXL7 (EXORDIUM LIKE 7); At1g35140 (At1g35140/T32G9_32) mRNA, complete cds                               | 1.286  | 0.0445   |
| At1g35210 | unknown protein                                                                                         | 5.799  | 6.97E-11 |
| At1g35230 | AGP5 (arabinogalactan protein 5); Encodes arabinogalactan-protein (AGP5).                               | 2.032  | 0.01229  |
| At1g35350 | EXS (ERD1/XPR1/SYG1) family protein                                                                     | 1.36   | 2.69E-06 |
| At1g35660 | unknown protein                                                                                         | 1.73   | 7.93E-08 |
| At1g36370 | SHM7 (serine hydroxymethyltransferase 7); Encodes a putative serine hydroxymethyltransferase.           | 3.892  | 4.77E-10 |
| At1g42990 | ATBZIP60 (basic region/leucine zipper motif 60); AtbZIP60 consists of a bZIP DNA binding domain fc      | 2.361  | 2.37E-10 |
| At1g43000 | PLATZ transcription factor family protein                                                               | 5.001  | 1.97E-11 |
| At1g43610 | Haloacid dehalogenase-like hydrolase (HAD) superfamily protein                                          | 1.048  | 0.00013  |
| At1g43675 | expressed protein (transposable element gene); similarity to non-LTR retroelement protein               | -1.349 | 0.00014  |
| At1g44224 | ECA1 gametogenesis related family protein; Encodes a ECA1 gametogenesis related family protein          | -1.026 | 3.84E-06 |
| At1g44414 | unknown protein                                                                                         | 5.531  | 4.01E-11 |
| At1g45616 | AtRLP6 (receptor like protein 6)                                                                        | -1.182 | 0.01334  |
| At1g47510 | 5PTASE11 (inositol polyphosphate 5-phosphatase 11); Encodes a phosphatidylinositol polyphosphate :      | 2.351  | 4.33E-07 |
| At1g47890 | AtRLP7 (receptor like protein 7)                                                                        | 4.057  | 4.40E-06 |
| At1g48780 | unknown protein                                                                                         | -1.025 | 3.71E-05 |
| At1g48930 | AtGH9C1 (glycosyl hydrolase 9C1)                                                                        | 1.041  | 0.01097  |
| At1g49050 | Eukaryotic aspartyl protease family protein                                                             | 1.217  | 1.33E-05 |
| At1g49200 | RING/U-box superfamily protein                                                                          | -2.077 | 1.15E-07 |
| At1g49210 | RING/U-box superfamily protein                                                                          | -2.078 | 3.44E-07 |
| At1g49230 | RING/U-box superfamily protein                                                                          | -1.727 | 1.23E-08 |
| At1g49370 | pseudogene, similar to OSJNBa0072F16.8, blastp match of 42% identity and 6.6e-73 P-value to GP 217      | -1.162 | 5.85E-06 |
| At1g49470 | Family of unknown function (DUF716)                                                                     | -1.024 | 5.22E-05 |
| At1g49780 | PUB26 (plant U-box 26)                                                                                  | 1.791  | 1.54E-06 |
| At1g49790 | F-box associated ubiquitination effector family protein                                                 | 1.407  | 2.67E-07 |
| At1g50040 | Protein of unknown function (DUF1005)                                                                   | -1.473 | 0.00059  |
| At1g50420 | SCL-3 (SCARECROW-LIKE 3); Encodes a scarecrow-like protein (SCL3) Putative transcription factor.        | -1.201 | 3.39E-06 |
| At1g50590 | RmlC-like cupins superfamily protein                                                                    | 1.396  | 6.64E-06 |
| At1g50740 | Transmembrane proteins 14C                                                                              | 3.551  | 1.71E-09 |
| At1g51170 | Protein kinase superfamily protein                                                                      | -1.098 | 6.00E-06 |
| At1g51270 | structural molecules                                                                                    | 2.729  | 1.22E-08 |

|           |                                                                                                        |        |          |
|-----------|--------------------------------------------------------------------------------------------------------|--------|----------|
| At1g51330 | Serine protease inhibitor (SERPIN) family protein                                                      | 1.3    | 0.00049  |
| At1g51470 | BGLU35 (beta glucosidase 35); Encodes a myrosinase.                                                    | 1.888  | 0.00195  |
| At1g51620 | Protein kinase superfamily protein                                                                     | 1.788  | 4.49E-06 |
| At1g51660 | ATMEK4 (ARABIDOPSIS THALIANA MITOGEN-ACTIVATED PROTEIN KINASE KINASE 4); E                             | 2.592  | 3.30E-08 |
| At1g51700 | ADOF1 (DOF zinc finger protein 1); Encodes dof zinc finger protein (adof1).                            | 2.062  | 8.48E-07 |
| At1g51790 | Leucine-rich repeat protein kinase family protein                                                      | -1.11  | 0.00487  |
| At1g51820 | Leucine-rich repeat protein kinase family protein                                                      | 1.173  | 0.00159  |
| At1g51850 | Leucine-rich repeat protein kinase family protein                                                      | -1.564 | 0.02395  |
| At1g52560 | HSP20-like chaperones superfamily protein                                                              | 8.048  | 8.07E-12 |
| At1g52790 | 2-oxoglutarate (2OG) and Fe(II)-dependent oxygenase superfamily protein; encodes a putative oxidored   | 2.441  | 0.00033  |
| At1g52820 | 2-oxoglutarate (2OG) and Fe(II)-dependent oxygenase superfamily protein                                | 1.445  | 2.50E-05 |
| At1g52870 | Peroxisomal membrane 22 kDa (Mpv17/PMP22) family protein                                               | 1.009  | 0.00051  |
| At1g53060 | Legume lectin family protein                                                                           | 1.171  | 8.71E-06 |
| At1g53080 | Legume lectin family protein                                                                           | 2.844  | 2.31E-09 |
| At1g53350 | Disease resistance protein (CC-NBS-LRR class) family                                                   | 1.008  | 7.27E-07 |
| At1g53430 | Leucine-rich repeat transmembrane protein kinase                                                       | 2.311  | 1.69E-09 |
| At1g53540 | HSP20-like chaperones superfamily protein                                                              | 7.776  | 3.14E-10 |
| At1g53625 | unknown protein                                                                                        | 1.802  | 0.00047  |
| At1g53870 | Protein of unknown function (DUF567)                                                                   | -1.292 | 1.88E-05 |
| At1g54050 | HSP20-like chaperones superfamily protein                                                              | 4.906  | 5.39E-11 |
| At1g54120 | unknown protein                                                                                        | -1.12  | 4.60E-06 |
| At1g54200 | unknown protein                                                                                        | -1.266 | 2.11E-07 |
| At1g55230 | Family of unknown function (DUF716)                                                                    | 1.393  | 7.16E-05 |
| At1g55300 | TAF7 (TBP-associated factor 7)                                                                         | 1.411  | 6.13E-09 |
| At1g55450 | S-adenosyl-L-methionine-dependent methyltransferases superfamily protein                               | 2.537  | 6.93E-07 |
| At1g55460 | DNA/RNA-binding protein Kin17, conserved region                                                        | 1.267  | 1.03E-06 |
| At1g55530 | RING/U-box superfamily protein                                                                         | 2.643  | 3.89E-10 |
| At1g55920 | ATSERAT2.1 (serine acetyltransferase 2.1); Encodes a chloroplast/cytosol localized serine O-acetyltran | 1.514  | 1.81E-08 |
| At1g56010 | anac021 (Arabidopsis NAC domain containing protein 21); Encodes a transcription factor involved in s   | -1.749 | 1.66E-05 |
| At1g56060 | unknown protein                                                                                        | 4.599  | 0.00014  |
| At1g56140 | Leucine-rich repeat transmembrane protein kinase                                                       | 1.843  | 8.21E-10 |
| At1g56240 | AtPP2-B13 (phloem protein 2-B13)                                                                       | 4.149  | 1.95E-06 |
| At1g56250 | AtPP2-B14 (phloem protein 2-B14)                                                                       | 3.869  | 2.19E-07 |
| At1g56300 | Chaperone DnaJ-domain superfamily protein                                                              | 3.173  | 1.11E-09 |
| At1g56440 | Tetratricopeptide repeat (TPR)-like superfamily protein                                                | 1.038  | 6.15E-06 |
| At1g56510 | ADR2 (ACTIVATED DISEASE RESISTANCE 2); TIR-NB-LRR protein that confers resistance to four              | 1.139  | 0.0005   |
| At1g56520 | Disease resistance protein (TIR-NBS-LRR class) family                                                  | 1.288  | 1.85E-05 |
| At1g56540 | Disease resistance protein (TIR-NBS-LRR class) family                                                  | 2.675  | 4.58E-10 |
| At1g56600 | AtGols2 (galactinol synthase 2)                                                                        | 1.062  | 0.00053  |
| At1g56710 | Pectin lyase-like superfamily protein                                                                  | -1.196 | 8.83E-05 |
| At1g57630 | Toll-Interleukin-Resistance (TIR) domain family protein                                                | 3.067  | 0.00882  |
| At1g57980 | Nucleotide-sugar transporter family protein                                                            | 1.284  | 1.93E-05 |
| At1g57990 | ATPUP18 (purine permease 18); Member of a family of proteins related to PUP1, a purine transporter. I  | 3.228  | 1.18E-08 |
| At1g58170 | Disease resistance-responsive (dirigent-like protein) family protein                                   | 2.564  | 1.74E-10 |
| At1g58420 | Uncharacterised conserved protein UCP031279                                                            | 2.904  | 2.16E-07 |
| At1g58807 | Disease resistance protein (CC-NBS-LRR class) family                                                   | 1.082  | 7.29E-07 |
| At1g59590 | ZCF37; ZCF37 mRNA, complete cds                                                                        | 3.275  | 2.66E-09 |
| At1g59730 | ATH7 (thioredoxin H-type 7)                                                                            | -1.19  | 0.01368  |
| At1g59860 | HSP20-like chaperones superfamily protein                                                              | 6.173  | 2.26E-11 |
| At1g59865 | unknown protein                                                                                        | 1.283  | 0.001    |
| At1g59870 | ABCG36 (ATP-BINDING CASSETTE G36); ATP binding cassette transporter. Localized to the plasm            | 1.168  | 1.49E-05 |
| At1g59910 | Actin-binding FH2 (formin homology 2) family protein                                                   | 2.445  | 2.85E-09 |
| At1g59980 | ARL2 (ARG1-like 2)                                                                                     | 1.164  | 9.43E-07 |
| At1g61140 | EDA16 (embryo sac development arrest 16)                                                               | 1.588  | 7.74E-06 |
| At1g61230 | Mannose-binding lectin superfamily protein                                                             | 1.098  | 1.47E-06 |
| At1g61255 | BEST Arabidopsis thaliana protein match is: glycine-rich protein (TAIR:AT4G21620.2)                    | -1.001 | 0.00056  |
| At1g61260 | Protein of unknown function (DUF761)                                                                   | 1.091  | 2.14E-06 |
| At1g61280 | Phosphatidylinositol N-acetylglucosaminyltransferase, GPI19/PIG-P subunit                              | 1.329  | 7.75E-05 |
| At1g61290 | SYP124 (syntaxin of plants 124); member of SYP12 Gene Family                                           | 3.092  | 1.36E-08 |
| At1g61360 | S-locus lectin protein kinase family protein                                                           | 1.08   | 0.0003   |
| At1g61460 | S-locus protein kinase, putative                                                                       | 2.267  | 2.43E-09 |
| At1g61470 | Polynucleotidyl transferase, ribonuclease H-like superfamily protein                                   | 4.415  | 3.68E-11 |
| At1g61475 | ATP binding                                                                                            | 1.674  | 1.35E-08 |
| At1g61560 | ATMLO6 (MILDEW RESISTANCE LOCUS O 6); A member of a large family of seven-transmembran                 | 2.239  | 1.61E-09 |
| At1g61665 | pseudogene, similar to serine/threonine kinase, blastp match of 55% identity and 3.4e-14 P-value to GP | 1.237  | 1.69E-06 |
| At1g61740 | Sulfite exporter TauE/SafE family protein                                                              | -1.861 | 2.05E-10 |
| At1g62030 | Cysteine/Histidine-rich C1 domain family protein                                                       | -1.406 | 1.53E-07 |

|           |                                                                                                          |        |          |
|-----------|----------------------------------------------------------------------------------------------------------|--------|----------|
| At1g62180 | APR2 (5'adenylylphosphosulfate reductase 2); encodes a adenosine 5'-phosphosulfate reductase, involve    | 1.402  | 5.26E-07 |
| At1g62300 | WRKY6 (WRKY family transcription factor); Encodes a transcription factor WRKY6. Regulates Phosj          | 1.587  | 2.24E-06 |
| At1g62420 | Protein of unknown function (DUF506)                                                                     | 1.562  | 6.82E-08 |
| At1g62580 | Flavin-binding monooxygenase family protein                                                              | -1.597 | 0.00066  |
| At1g62740 | stress-inducible protein, putative                                                                       | 1.22   | 1.47E-06 |
| At1g63245 | CLE14 (CLAVATA3/ESR-RELATED 14); Member of a large family of putative ligands homologous to              | 1.079  | 0.00081  |
| At1g63350 | Disease resistance protein (CC-NBS-LRR class) family                                                     | 1.825  | 1.83E-08 |
| At1g63360 | Disease resistance protein (CC-NBS-LRR class) family                                                     | 1.225  | 8.03E-06 |
| At1g63720 | BEST Arabidopsis thaliana protein match is: hydroxyproline-rich glycoprotein family protein (TAIR:A1     | 3.088  | 2.00E-09 |
| At1g63740 | Disease resistance protein (TIR-NBS-LRR class) family                                                    | 1.245  | 1.69E-07 |
| At1g63750 | Disease resistance protein (TIR-NBS-LRR class) family                                                    | 2.788  | 1.69E-08 |
| At1g63820 | CCT motif family protein                                                                                 | 3.132  | 4.22E-09 |
| At1g63830 | PLAC8 family protein                                                                                     | 1.761  | 2.14E-09 |
| At1g63840 | RING/U-box superfamily protein                                                                           | 1.595  | 1.63E-08 |
| At1g63857 | NA                                                                                                       | 1.715  | 3.85E-07 |
| At1g63860 | Disease resistance protein (TIR-NBS-LRR class) family                                                    | 1.497  | 8.29E-06 |
| At1g64065 | Late embryogenesis abundant (LEA) hydroxyproline-rich glycoprotein family                                | 2.724  | 8.22E-07 |
| At1g64405 | unknown protein                                                                                          | -1.072 | 6.09E-05 |
| At1g64610 | Transducin/WD40 repeat-like superfamily protein                                                          | 1.721  | 8.85E-07 |
| At1g64625 | Serine/threonine-protein kinase WNK (With No Lysine)-related                                             | -1.034 | 8.18E-05 |
| At1g65240 | Eukaryotic aspartyl protease family protein                                                              | 1.358  | 0.002    |
| At1g65310 | ATXTH17 (XYLOGLUCAN ENDOTRANSGLUCOSYLASE/HYDROLASE 17); Encodes a xyloglucan                             | 1.154  | 0.00242  |
| At1g65390 | ATPP2-A5 (phloem protein 2 A5)                                                                           | 2.217  | 4.91E-06 |
| At1g65481 | unknown protein                                                                                          | -1.368 | 0.0169   |
| At1g66080 | unknown protein                                                                                          | 4.443  | 5.39E-11 |
| At1g66090 | Disease resistance protein (TIR-NBS class)                                                               | 5.923  | 1.74E-07 |
| At1g66160 | CMPG1 (CYS, MET, PRO, and GLY protein 1)                                                                 | 3.274  | 1.96E-09 |
| At1g66280 | BGLU22 (Glycosyl hydrolase superfamily protein)                                                          | 1.896  | 0.01622  |
| At1g66400 | CML23 (calmodulin like 23); Encodes a calmodulin-like protein. Regulates nitric oxide levels and tran    | 1.884  | 1.65E-06 |
| At1g66480 | PMI2 (plastid movement impaired 2); Involved in chloroplast avoidance movement under intermediate        | 1.159  | 2.62E-05 |
| At1g66500 | Pre-mRNA cleavage complex II                                                                             | 3.129  | 1.72E-08 |
| At1g66510 | AAR2 protein family                                                                                      | 2.121  | 8.10E-09 |
| At1g66920 | Protein kinase superfamily protein                                                                       | 1.218  | 0.00017  |
| At1g67060 | unknown protein                                                                                          | 1.44   | 4.26E-07 |
| At1g67100 | LBD40 (LOB domain-containing protein 40)                                                                 | -1.336 | 0.0043   |
| At1g67265 | DVL3 (DEVIL 3)                                                                                           | -1.526 | 1.04E-05 |
| At1g67310 | Calmodulin-binding transcription activator protein with CG-1 and Ankyrin domains                         | 1.048  | 2.58E-06 |
| At1g67360 | Rubber elongation factor protein (REF)                                                                   | 2.549  | 1.37E-08 |
| At1g67365 | other RNA; Potential natural antisense gene, locus overlaps with AT1G67370                               | 3.323  | 8.05E-11 |
| At1g67460 | Minichromosome maintenance (MCM2/3/5) family protein                                                     | 1.784  | 1.13E-06 |
| At1g67470 | Protein kinase superfamily protein                                                                       | 2.202  | 6.73E-09 |
| At1g67530 | ARM repeat superfamily protein                                                                           | 1.121  | 1.39E-06 |
| At1g67810 | SUFE2 (sulfur E2); Encodes a protein capable of stimulating the cysteine desulfurase activity of CpNifS  | 2.073  | 3.75E-06 |
| At1g67856 | RING/U-box superfamily protein                                                                           | 2.252  | 1.34E-08 |
| At1g67920 | unknown protein                                                                                          | 3.983  | 6.31E-10 |
| At1g67970 | HSFA8 (heat shock transcription factor A8); member of Heat Stress Transcription Factor (Hsf) family      | 2.374  | 2.32E-08 |
| At1g68300 | Adenine nucleotide alpha hydrolases-like superfamily protein                                             | 1.013  | 1.33E-05 |
| At1g68320 | AtMYB62 (myb domain protein 62); putative transcription factor: R2R3-MYB transcription family. In        | 1.652  | 3.21E-07 |
| At1g68330 | unknown protein                                                                                          | 1.882  | 8.95E-08 |
| At1g68390 | Core-2/I-branching beta-1,6-N-acetylglucosaminyltransferase family protein                               | 1.093  | 2.83E-05 |
| At1g68450 | VQ motif-containing protein                                                                              | 2.244  | 1.59E-08 |
| At1g68500 | unknown protein                                                                                          | -1.09  | 7.64E-05 |
| At1g68520 | B-box type zinc finger protein with CCT domain                                                           | -1.402 | 0.0003   |
| At1g68620 | alpha/beta-Hydrolases superfamily protein                                                                | 2.924  | 4.49E-05 |
| At1g68690 | Protein kinase superfamily protein                                                                       | 1.975  | 1.15E-07 |
| At1g68930 | pentatricopeptide (PPR) repeat-containing protein                                                        | 1.805  | 2.48E-08 |
| At1g69040 | ACR4 (ACT domain repeat 4); ACT-domain containing protein involved in feedback regulation of amir        | -1.135 | 1.86E-05 |
| At1g69160 | unknown protein                                                                                          | -1.377 | 3.92E-07 |
| At1g69270 | RPK1 (receptor-like protein kinase 1); RPK1 is a leucine-rich receptor-like kinase located in the plasma | 1.026  | 2.32E-06 |
| At1g69430 | unknown protein                                                                                          | 1.295  | 4.50E-05 |
| At1g69490 | ANAC029 (Arabidopsis NAC domain containing protein 29); Encodes a member of the NAC transcript           | 1.055  | 0.0175   |
| At1g69530 | ATEXPA1 (expansin A1); Member of Alpha-Expansin Gene Family. Naming convention from the Exp              | -1.182 | 4.42E-06 |
| At1g69570 | Dof-type zinc finger DNA-binding family protein                                                          | -1.608 | 7.59E-08 |
| At1g69760 | unknown protein                                                                                          | -1.115 | 1.45E-05 |
| At1g69820 | GGT3 (gamma-glutamyl transpeptidase 3); Note that conflicting nomenclature exists in the literature: A   | 1.794  | 4.70E-07 |
| At1g69840 | SPFH/Band 7/PHB domain-containing membrane-associated protein family                                     | 1.577  | 0.0159   |
| At1g69880 | ATH8 (thioredoxin H-type 8)                                                                              | -1.725 | 0.0039   |

|           |                                                                                                             |        |          |
|-----------|-------------------------------------------------------------------------------------------------------------|--------|----------|
| At1g69890 | Protein of unknown function (DUF569)                                                                        | 3.295  | 2.49E-08 |
| At1g69900 | Actin cross-linking protein                                                                                 | 2.462  | 3.91E-08 |
| At1g69920 | ATGSTU12 (ARABIDOPSIS THALIANA GLUTATHIONE S-TRANSFERASE TAU 12); Encodes glutathione transferase           | 1.939  | 0.00016  |
| At1g70140 | ATFH8 (formin 8); Encodes a group I formin. Binds to F-actin barbed ends. Has severing actin filament       | 1.255  | 5.97E-05 |
| At1g70170 | MMP (matrix metalloproteinase); mutant has Late flowering; Early senescence; Matrix Metalloproteinase       | 1.171  | 0.00028  |
| At1g70290 | TPS8 (trehalose-6-phosphatase synthase S8); Encodes an enzyme putatively involved in trehalose biosynthesis | -1.193 | 0.00022  |
| At1g70300 | KUP6 (K <sup>+</sup> uptake permease 6); potassium transporter                                              | 1.722  | 1.32E-07 |
| At1g70420 | Protein of unknown function (DUF1645)                                                                       | 1.72   | 4.94E-07 |
| At1g70530 | CRK3 (cysteine-rich RLK (RECEPTOR-like protein kinase) 3); Encodes a cysteine-rich receptor-like protein    | 1.978  | 2.86E-09 |
| At1g70581 | other RNA                                                                                                   | 1.321  | 0.00098  |
| At1g70740 | Protein kinase superfamily protein                                                                          | 1.733  | 3.64E-07 |
| At1g70800 | Calcium-dependent lipid-binding (CaLB domain) family protein                                                | -1.005 | 0.0158   |
| At1g70990 | proline-rich family protein                                                                                 | 2.274  | 1.54E-08 |
| At1g71000 | Chaperone DnaJ-domain superfamily protein                                                                   | 5.757  | 8.88E-07 |
| At1g71030 | ATMYBL2 (ARABIDOPSIS MYB-LIKE 2); Encodes a putative myb family transcription factor. In control of         | -1.011 | 0.00225  |
| At1g71230 | CSN5B (COP9-signalosome 5B); Encodes a subunit of the COP9 complex, similar to JAB1, a specific             | 1.521  | 1.08E-07 |
| At1g71400 | AtRLP12 (receptor like protein 12); Encodes a CLAVATA2 (CLV2)-related gene. Complements the clavata         | 2.072  | 7.63E-08 |
| At1g71520 | Integrase-type DNA-binding superfamily protein; encodes a member of the DREB subfamily A-5 of ER            | 5.135  | 1.41E-10 |
| At1g71530 | Protein kinase superfamily protein                                                                          | 1.254  | 7.44E-05 |
| At1g71970 | unknown protein                                                                                             | -1.004 | 4.53E-06 |
| At1g72100 | late embryogenesis abundant domain-containing protein / LEA domain-containing protein                       | 1.767  | 6.57E-09 |
| At1g72240 | unknown protein                                                                                             | 1.631  | 1.62E-06 |
| At1g72280 | AERO1 (endoplasmic reticulum oxidoreductins 1); endoplasmic reticulum oxidoreductin                         | 1.832  | 1.67E-07 |
| At1g72416 | Chaperone DnaJ-domain superfamily protein                                                                   | 2.582  | 2.30E-09 |
| At1g72660 | P-loop containing nucleoside triphosphate hydrolases superfamily protein                                    | 6.443  | 3.22E-13 |
| At1g72830 | NF-YA3 (nuclear factor Y, subunit A3); Encodes a subunit of CCAAT-binding complex, binds to CCAAT           | -1.019 | 3.22E-05 |
| At1g72900 | Toll-Interleukin-Resistance (TIR) domain-containing protein                                                 | 2.495  | 0.0001   |
| At1g72910 | Toll-Interleukin-Resistance (TIR) domain-containing protein                                                 | 3.911  | 4.58E-05 |
| At1g72920 | Toll-Interleukin-Resistance (TIR) domain family protein                                                     | 3.515  | 1.17E-06 |
| At1g72940 | Toll-Interleukin-Resistance (TIR) domain-containing protein                                                 | 2.401  | 1.97E-07 |
| At1g72950 | Disease resistance protein (TIR-NBS class)                                                                  | 2.455  | 1.72E-08 |
| At1g73080 | ATPEPR1 (PEP1 RECEPTOR 1); Encodes a leucine-rich repeat receptor kinase. Functions as a receptor           | 1.574  | 1.23E-08 |
| At1g73480 | alpha/beta-Hydrolases superfamily protein                                                                   | 1.703  | 5.24E-06 |
| At1g73500 | MKK9 (MAP kinase kinase 9); member of MAP Kinase Kinase family. Autophosphorylates and also phosphorylates  | 1.886  | 3.24E-08 |
| At1g73540 | atnudt21 (nudix hydrolase homolog 21)                                                                       | 1.693  | 5.10E-08 |
| At1g73740 | UDP-Glycosyltransferase superfamily protein                                                                 | 2.81   | 9.63E-10 |
| At1g73805 | Calmodulin binding protein-like                                                                             | 1.962  | 0.0001   |
| At1g73810 | Core-2/I-branching beta-1,6-N-acetylglucosaminyltransferase family protein                                  | 4.186  | 3.87E-05 |
| At1g74310 | ATHSP101 (heat shock protein 101); Encodes ClpB1, which belongs to the Casein lytic proteinase/heat shock   | 4.459  | 7.60E-10 |
| At1g74320 | Protein kinase superfamily protein; encodes a choline kinase, whose expression is induced by high salt ;    | 1.502  | 2.22E-07 |
| At1g74330 | Protein kinase superfamily protein                                                                          | 1.705  | 2.55E-08 |
| At1g74360 | Leucine-rich repeat protein kinase family protein                                                           | 2.434  | 8.56E-06 |
| At1g74440 | Protein of unknown function (DUF962)                                                                        | 1.981  | 2.69E-05 |
| At1g74450 | Protein of unknown function (DUF793)                                                                        | 1.974  | 3.76E-08 |
| At1g74590 | ATGSTU10 (GLUTATHIONE S-TRANSFERASE TAU 10); Encodes glutathione transferase belonging to the gamma         | 1.06   | 0.03516  |
| At1g74870 | RING/U-box superfamily protein                                                                              | 1.147  | 0.00015  |
| At1g74940 | Protein of unknown function (DUF581)                                                                        | -1.86  | 4.67E-08 |
| At1g75000 | GNS1/SUR4 membrane protein family                                                                           | 2.109  | 5.88E-06 |
| At1g75020 | LPAT4 (lysophosphatidyl acyltransferase 4)                                                                  | 2      | 2.97E-07 |
| At1g75270 | DHAR2 (dehydroascorbate reductase 2)                                                                        | 1.838  | 1.35E-06 |
| At1g75580 | SAUR-like auxin-responsive protein family                                                                   | -1.139 | 0.00282  |
| At1g76040 | CPK29 (calcium-dependent protein kinase 29); member of Calcium Dependent Protein Kinase                     | 1.163  | 0.0002   |
| At1g76070 | unknown protein                                                                                             | 3.303  | 1.45E-10 |
| At1g76360 | Protein kinase superfamily protein                                                                          | 1.048  | 6.48E-05 |
| At1g76410 | ATL8 (RING/U-box superfamily protein)                                                                       | -1.108 | 1.87E-05 |
| At1g76440 | HSP20-like chaperones superfamily protein                                                                   | 1.328  | 6.70E-07 |
| At1g76600 | unknown protein                                                                                             | 2.816  | 2.84E-08 |
| At1g76650 | CML38 (calmodulin-like 38)                                                                                  | 1.22   | 0.01864  |
| At1g76680 | ATOPR1 (ARABIDOPSIS 12-OXOPHYTODIENOATE REDUCTASE 1); Encodes a member of an aldehyde                       | 2.78   | 3.83E-07 |
| At1g76700 | DNAJ heat shock N-terminal domain-containing protein                                                        | 1.199  | 1.54E-08 |
| At1g76878 | other RNA; Potential natural antisense gene, locus overlaps with AT1G76880                                  | 1.5    | 1.10E-06 |
| At1g76890 | GT2 (Duplicated homeodomain-like superfamily protein); encodes a plant trihelix DNA-binding protein         | -1.04  | 4.15E-06 |
| At1g76965 | FUNCTIONS IN: molecular_function unknown; INVOLVED IN: biological_process unknown; LOCALIZATION: cytoplasm  | 1.421  | 1.74E-06 |
| At1g76970 | Target of Myb protein 1                                                                                     | 1.397  | 1.08E-07 |
| At1g76980 | BEST Arabidopsis thaliana protein match is: embryo defective 2170 (TAIR:AT1G21390.1)                        | 2.941  | 7.73E-09 |
| At1g77120 | ADH (ALCOHOL DEHYDROGENASE); Catalyzes the reduction of acetaldehyde using NADH as reductant                | -1.456 | 0.0092   |
| At1g77410 | BGAL16 (beta-galactosidase 16)                                                                              | 1.116  | 4.17E-06 |

|           |                                                                                                                  |        |          |
|-----------|------------------------------------------------------------------------------------------------------------------|--------|----------|
| At1g77450 | anac032 (NAC domain containing protein 32)                                                                       | 2.54   | 2.00E-08 |
| At1g77460 | Armadillo/beta-catenin-like repeat                                                                               | 1.009  | 6.55E-05 |
| At1g77530 | O-methyltransferase family protein                                                                               | 1.393  | 7.54E-06 |
| At1g77570 | Winged helix-turn-helix transcription repressor DNA-binding                                                      | 1.461  | 1.78E-05 |
| At1g77640 | Integrase-type DNA-binding superfamily protein; encodes a member of the DREB subfamily A-5 of ER                 | 1.424  | 3.44E-05 |
| At1g77890 | DNA-directed RNA polymerase II protein                                                                           | 1.323  | 1.15E-06 |
| At1g78170 | unknown protein                                                                                                  | -1.695 | 1.57E-08 |
| At1g78270 | AtUGT85A4 (UDP-glucosyl transferase 85A4)                                                                        | -1.212 | 3.27E-06 |
| At1g78310 | VQ motif-containing protein                                                                                      | 2.228  | 4.92E-09 |
| At1g78390 | ATNCED9 (NINE-CIS-EPOXYCAROTENOID DIOXYGENASE 9); Encodes 9-cis-epoxycarotenoid d                                | 1.688  | 3.85E-08 |
| At1g78410 | VQ motif-containing protein                                                                                      | 4.524  | 6.56E-09 |
| At1g78450 | SOUL heme-binding family protein                                                                                 | -1.02  | 0.001    |
| At1g78600 | DBB3 (DOUBLE B-BOX 3)                                                                                            | 1.087  | 4.64E-06 |
| At1g79110 | zinc ion binding                                                                                                 | -1.512 | 1.56E-06 |
| At1g79160 | unknown protein                                                                                                  | -1.695 | 1.73E-08 |
| At1g79400 | ATCHX2 (cation/H <sup>+</sup> exchanger 2); member of Putative Na <sup>+</sup> /H <sup>+</sup> antiporter family | -1.067 | 0.02908  |
| At1g79410 | 5-Oct (organic cation/carnitine transporter5)                                                                    | 1.023  | 3.70E-06 |
| At1g79670 | RFO1 (RESISTANCE TO FUSARIUM OXYSPORUM 1); Encodes a receptor-like kinase that does not                          | 1.163  | 5.25E-08 |
| At1g79680 | WAKL10 (WALL ASSOCIATED KINASE (WAK)-LIKE 10)                                                                    | 4.395  | 3.97E-08 |
| At1g79770 | Protein of unknown function (DUF1677)                                                                            | -1.062 | 0.0002   |
| At1g79920 | Heat shock protein 70 (Hsp 70) family protein                                                                    | 1.004  | 7.97E-06 |
| At1g80080 | AtRLP17 (Receptor Like Protein 17); Encodes a transmembrane leucine-repeat containing receptor-like              | -1.214 | 8.85E-05 |
| At1g80130 | Tetratricopeptide repeat (TPR)-like superfamily protein                                                          | -1.329 | 0.0079   |
| At1g80440 | Galactose oxidase/kelch repeat superfamily protein                                                               | -1.291 | 6.08E-05 |
| At1g80820 | CCR2 (cinnamoyl coa reductase); Encodes an cinnamoyl CoA reductase isoform. Involved in lignin bic               | 2.464  | 3.34E-06 |
| At1g80840 | WRKY40 (WRKY DNA-binding protein 40); Pathogen-induced transcription factor. Binds W-box sequ                    | 5.571  | 1.60E-07 |
| At2g01020 | 5SrRNA (rRNA)                                                                                                    | -1.347 | 0.02794  |
| At2g01180 | ATPAP1 (phosphatidic acid phosphatase 1); Encodes phosphatidate phosphatase. Up-regulated by genc                | 3.208  | 1.01E-08 |
| At2g01505 | CLE16 (CLAVATA3/ESR-RELATED 16); Member of a large family of putative ligands homologous to                      | -1.15  | 5.61E-06 |
| At2g01530 | MLP329 (MLP-like protein 329)                                                                                    | 1.538  | 0.01625  |
| At2g02220 | ATPSKR1 (PHYTOSULFOKIN RECEPTOR 1); Encodes a protein interacting with phytosulfokine, a f                       | 1.658  | 6.66E-08 |
| At2g02580 | CYP71B9 (cytochrome P450, family 71, subfamily B, polypeptide 9); member of CYP71B                               | -1.107 | 1.72E-05 |
| At2g02750 | Pentatricopeptide repeat (PPR) superfamily protein                                                               | 1.182  | 0.0213   |
| At2g02850 | ARPN (plantacyanin); Encodes plantacyanin one of blue copper proteins. Involved in anther developme              | -1.013 | 0.00051  |
| At2g02860 | ATSUC3 (ARABIDOPSIS THALIANA SUCROSE TRANSPORTER 3); encodes a sucrose transporter                               | 1.551  | 1.68E-06 |
| At2g02950 | PKS1 (phytochrome kinase substrate 1); Encodes a basic soluble protein which can independently bind              | -1.456 | 3.16E-06 |
| At2g03890 | ATPI4K GAMMA 7 (phosphoinositide 4-kinase gamma 7); Phosphoinositide kinase which undergo au                     | -1.134 | 7.29E-07 |
| At2g04240 | XERICO (RING/U-box superfamily protein); Encodes a small protein with an N-terminal trans-membra                 | -1.126 | 5.87E-08 |
| At2g04600 | similar to unknown protein [Arabidopsis thaliana] (TAIR:AT2G13865.1)                                             | 1.716  | 0.00133  |
| At2g05050 | Protein phosphatase 2C family protein                                                                            | 2.483  | 1.14E-10 |
| At2g05940 | Protein kinase superfamily protein                                                                               | 1.519  | 4.57E-05 |
| At2g06530 | VPS2.1 (SNF7 family protein)                                                                                     | 1.255  | 2.77E-06 |
| At2g09994 | pseudogene of U-box domain-containing protein / armadillo/beta-catenin repeat family protein; pseudog            | 1.259  | 3.70E-05 |
| At2g13790 | ATSERK4 (SOMATIC EMBRYOGENESIS RECEPTOR-LIKE KINASE 4)                                                           | 2.098  | 1.46E-06 |
| At2g13800 | ATSERK5 (SOMATIC EMBRYOGENESIS RECEPTOR LIKE KINASE 5)                                                           | 1.047  | 0.0009   |
| At2g14247 | Expressed protein                                                                                                | -1.166 | 0.00564  |
| At2g15040 | AtRLP18 (receptor like protein 18)                                                                               | 2.346  | 5.80E-07 |
| At2g15390 | FUT4 (fucosyltransferase 4); Predicted fucosyltransferase, based on similarity to FUT1, but not functio          | 3.931  | 9.28E-10 |
| At2g15480 | UGT73B5 (UDP-glucosyl transferase 73B5)                                                                          | 2.689  | 5.60E-09 |
| At2g15490 | UGT73B4 (UDP-glycosyltransferase 73B4)                                                                           | 2.99   | 5.69E-08 |
| At2g15760 | Protein of unknown function (DUF1645)                                                                            | 1.412  | 5.45E-07 |
| At2g16060 | AHB1 (hemoglobin 1); Encodes a class 1 nonsymbiotic hemoglobin induced by low oxygen levels with                 | -1.505 | 0.0032   |
| At2g16720 | ATMYB7 (ARABIDOPSIS THALIANA MYB DOMAIN PROTEIN 7); Encodes a member of MYB3R                                    | 1.077  | 6.45E-06 |
| At2g16870 | Disease resistance protein (TIR-NBS-LRR class) family                                                            | 1.125  | 1.24E-05 |
| At2g16900 | Arabidopsis phospholipase-like protein (PEARLI 4) family                                                         | 1.114  | 4.57E-07 |
| At2g17040 | anac036 (NAC domain containing protein 36); Member of the NAC transcription factor family and mor                | 2.084  | 0.00014  |
| At2g17220 | Protein kinase superfamily protein                                                                               | 1.108  | 3.81E-07 |
| At2g17705 | unknown protein                                                                                                  | 1.8    | 1.55E-08 |
| At2g17850 | Rhodanese/Cell cycle control phosphatase superfamily protein                                                     | -1.676 | 0.0117   |
| At2g17900 | SDG37 (SET domain group 37); Homology Subgroup S-ET - Protein containing an interrupted SET do                   | 1.319  | 9.82E-07 |
| At2g18010 | SAUR-like auxin-responsive protein family                                                                        | -1.495 | 1.10E-05 |
| At2g18210 | unknown protein                                                                                                  | 3.733  | 1.36E-08 |
| At2g18300 | basic helix-loop-helix (bHLH) DNA-binding superfamily protein                                                    | -1.46  | 5.18E-07 |
| At2g18560 | UDP-Glycosyltransferase superfamily protein                                                                      | -1.636 | 2.84E-06 |
| At2g18680 | unknown protein                                                                                                  | 1.752  | 9.77E-06 |
| At2g19190 | FRK1 (FLG22-induced receptor-like kinase 1); Receptor-like protein kinase. Involved in early defense             | -1.285 | 0.0286   |
| At2g19310 | HSP20-like chaperones superfamily protein                                                                        | 1.895  | 6.21E-09 |



|           |                                                                                                         |        |          |
|-----------|---------------------------------------------------------------------------------------------------------|--------|----------|
| At2g19630 | F-box and associated interaction domains-containing protein                                             | 1.696  | 5.31E-10 |
| At2g19710 | Regulator of Vps4 activity in the MVB pathway protein                                                   | 1.993  | 1.56E-08 |
| At2g19980 | CAP (Cysteine-rich secretory proteins, Antigen 5, and Pathogenesis-related 1 protein) superfamily prote | -1.61  | 1.83E-06 |
| At2g19990 | PR-1-LIKE (pathogenesis-related protein-1-like); Encodes a PR-1-like protein homolog that is differenti | -1.011 | 7.05E-05 |
| At2g20110 | Tesmin/TSO1-like CXC domain-containing protein                                                          | 1.21   | 5.50E-05 |
| At2g20142 | Toll-Interleukin-Resistance (TIR) domain family protein                                                 | 3.181  | 1.05E-06 |
| At2g20560 | DNAJ heat shock family protein                                                                          | 4.435  | 1.18E-11 |
| At2g20562 | unknown protein                                                                                         | 2.582  | 7.97E-08 |
| At2g20670 | Protein of unknown function (DUF506)                                                                    | -1.076 | 0.00504  |
| At2g20720 | Pentatricopeptide repeat (PPR) superfamily protein                                                      | 1.976  | 1.41E-09 |
| At2g20880 | Integrase-type DNA-binding superfamily protein                                                          | -1.15  | 0.01253  |
| At2g20960 | pEARLI4 (Arabidopsis phospholipase-like protein (PEARLI 4) family)                                      | 1.353  | 5.75E-07 |
| At2g21080 | unknown protein                                                                                         | -1.053 | 3.39E-06 |
| At2g21120 | Protein of unknown function (DUF803)                                                                    | 1.098  | 1.19E-07 |
| At2g21185 | unknown protein                                                                                         | -1.13  | 4.13E-05 |
| At2g21200 | SAUR-like auxin-responsive protein family                                                               | -1.488 | 1.74E-07 |
| At2g21210 | SAUR-like auxin-responsive protein family ; Putative auxin-regulated protein whose expression is down   | -2.853 | 1.86E-10 |
| At2g21560 | unknown protein                                                                                         | -1.058 | 1.43E-06 |
| At2g21940 | SK1 (shikimate kinase 1)                                                                                | 1.476  | 8.72E-07 |
| At2g22200 | Integrase-type DNA-binding superfamily protein; encodes a member of the DREB subfamily A-6 of ER        | -2.164 | 4.70E-07 |
| At2g22300 | CAMTA3 (CALMODULIN-BINDING TRANSCRIPTION ACTIVATOR 3); Encodes a putative CAM                           | 1.727  | 9.23E-09 |
| At2g22496 | MIR779A (microRNA779A); Encodes a microRNA of unknown function. MicroRNAs are regulatory R              | 3.656  | 3.11E-09 |
| At2g22500 | ATPUMP5 (PLANT UNCOUPLING MITOCHONDRIAL PROTEIN 5); Encodes one of the mitochond                        | 2.536  | 1.43E-07 |
| At2g22770 | NAI1 (basic helix-loop-helix (bHLH) DNA-binding superfamily protein); regulates the development of      | -1.157 | 3.01E-05 |
| At2g22800 | HAT9 (Homeobox-leucine zipper protein family); Encodes homeobox protein HAT9.                           | -1.418 | 1.11E-07 |
| At2g22810 | ACC4 (1-AMINOCYCLOPROPANE-1-CARBOXYLIC ACID SYNTHASE POLYPEPTIDE); key reg                              | -1.444 | 2.42E-05 |
| At2g22880 | VQ motif-containing protein                                                                             | 3.555  | 1.09E-07 |
| At2g23110 | Late embryogenesis abundant protein, group 6                                                            | 1.336  | 0.00024  |
| At2g23270 | unknown protein                                                                                         | 2.328  | 4.50E-08 |
| At2g23320 | WRKY15 (WRKY DNA-binding protein 15); Encodes WRKY DNA-binding protein 15 (WRKY15).                     | 1.829  | 2.43E-08 |
| At2g23430 | KRP1 (KIP-RELATED PROTEIN 1); Encodes a cyclin-dependent kinase inhibitor protein that function         | -1.407 | 4.25E-06 |
| At2g23680 | Cold acclimation protein WCOR413 family                                                                 | 1.911  | 2.43E-07 |
| At2g23755 | unknown protein                                                                                         | -1.412 | 2.21E-08 |
| At2g23770 | protein kinase family protein / peptidoglycan-binding LysM domain-containing protein                    | 2.68   | 8.34E-07 |
| At2g23810 | TET8 (tetraspanin8); Member of TETRASPANIN family                                                       | 3.145  | 1.14E-07 |
| At2g24100 | unknown protein                                                                                         | 1.352  | 6.82E-08 |
| At2g24165 | pseudogene, similar to HcrVf3 protein, blastp match of 37% identity and 5.1e-32 P-value to GP 143307    | 1.929  | 2.16E-07 |
| At2g24600 | Ankyrin repeat family protein                                                                           | 3.259  | 2.41E-08 |
| At2g24610 | ATCNGC14 (cyclic nucleotide-gated channel 14); member of Cyclic nucleotide gated channel family         | 1.691  | 6.58E-08 |
| At2g25140 | CLPB-M (CASEIN LYTIC PROTEINASE B-M); Encodes ClpB4, which belongs to the Casein lytic pr               | 3.435  | 7.49E-10 |
| At2g25200 | Plant protein of unknown function (DUF868)                                                              | -1.176 | 9.02E-05 |
| At2g25460 | CONTAINS InterPro DOMAIN/s: C2 calcium-dependent membrane targeting (InterPro:IPR000008); B             | 2.22   | 1.43E-06 |
| At2g25680 | MOT1 (molybdate transporter 1); Encodes a high-affinity molybdate transporter. Mutant has reduced cc    | -1.014 | 2.98E-05 |
| At2g25735 | unknown protein                                                                                         | 3.254  | 2.59E-09 |
| At2g25780 | Protein of unknown function (DUF1677)                                                                   | -1.242 | 0.00018  |
| At2g26130 | RING/U-box protein with C6HC-type zinc finger                                                           | -1.126 | 0.00555  |
| At2g26140 | ftsh4 (FTSH protease 4); encodes an FtsH protease that is localized to the mitochondrion                | 1.032  | 3.47E-06 |
| At2g26150 | ATHSFA2 (heat shock transcription factor A2); member of Heat Stress Transcription Factor (Hsf) famil    | 6.525  | 5.40E-11 |
| At2g26190 | calmodulin-binding family protein                                                                       | 2.949  | 6.49E-09 |
| At2g26520 | unknown protein                                                                                         | 1.005  | 9.89E-05 |
| At2g26530 | AR781 (Protein of unknown function (DUF1645)); unknown function                                         | 3.747  | 6.19E-10 |
| At2g26560 | PLA IIA (PHOSPHOLIPASE A 2A); Encodes a lipid acyl hydrolase with wide substrate specificity tha        | 1.957  | 0.0021   |
| At2g26710 | BAS1 (PHYB ACTIVATION TAGGED SUPPRESSOR 1); Encodes a member of the cytochrome p450                     | -1.054 | 1.76E-05 |
| At2g26975 | Ctr copper transporter family                                                                           | 1.093  | 9.06E-07 |
| At2g27080 | Late embryogenesis abundant (LEA) hydroxyproline-rich glycoprotein family                               | 1.599  | 7.72E-05 |
| At2g27260 | Late embryogenesis abundant (LEA) hydroxyproline-rich glycoprotein family                               | 1.309  | 1.43E-05 |
| At2g27310 | F-box family protein                                                                                    | 2.021  | 1.42E-07 |
| At2g27570 | P-loop containing nucleoside triphosphate hydrolases superfamily protein                                | 1.099  | 5.15E-05 |
| At2g27580 | A20/AN1-like zinc finger family protein                                                                 | 2.331  | 2.35E-09 |
| At2g27830 | unknown protein                                                                                         | 1.226  | 0.0032   |
| At2g28040 | Eukaryotic aspartyl protease family protein                                                             | 1.561  | 1.22E-06 |
| At2g28056 | MIR172 (MICRORNA 172); Encodes a microRNA that targets several genes containing AP2 domains i           | 4.105  | 8.07E-12 |
| At2g28180 | CHX8 (CATION/H+ EXCHANGER 8); member of Putative Na+/H+ antiporter family                               | 1.328  | 0.00057  |
| At2g28210 | ACA2 (alpha carbonic anhydrase 2)                                                                       | 1.065  | 0.0308   |
| At2g28400 | Protein of unknown function, DUF584                                                                     | 1.838  | 7.37E-06 |
| At2g28410 | unknown protein                                                                                         | -1.13  | 2.81E-05 |
| At2g28500 | LBD11 (LOB domain-containing protein 11)                                                                | 1.326  | 1.84E-06 |

|           |                                                                                                        |        |          |
|-----------|--------------------------------------------------------------------------------------------------------|--------|----------|
| At2g28550 | RAP2.7 (related to AP2.7)                                                                              | -1.381 | 3.03E-08 |
| At2g28650 | ATEXO70H8 (exocyst subunit exo70 family protein H8); A member of EXO70 gene family, putative e         | 1.761  | 4.65E-05 |
| At2g28830 | PUB12 (PLANT U-BOX 12)                                                                                 | 1.621  | 3.09E-09 |
| At2g28870 | unknown protein                                                                                        | -1.61  | 1.08E-07 |
| At2g29060 | GRAS family transcription factor                                                                       | 1.565  | 1.46E-07 |
| At2g29300 | NAD(P)-binding Rossmann-fold superfamily protein                                                       | -1.041 | 0.00098  |
| At2g29370 | NAD(P)-binding Rossmann-fold superfamily protein                                                       | -1.098 | 0.00147  |
| At2g29420 | ATGSTU7 (glutathione S-transferase tau 7); Encodes glutathione transferase belonging to the tau class  | 1.373  | 1.75E-07 |
| At2g29450 | ATGSTU1 (ARABIDOPSIS THALIANA GLUTATHIONE S-TRANSFERASE TAU 1); Encodes a me                           | 1.669  | 9.34E-07 |
| At2g29480 | ATGSTU2 (glutathione S-transferase tau 2); Encodes glutathione transferase belonging to the tau class  | 1.726  | 8.10E-06 |
| At2g29490 | ATGSTU1 (glutathione S-transferase TAU 1); Encodes glutathione transferase belonging to the tau clas   | 1.34   | 6.35E-05 |
| At2g29500 | HSP20-like chaperones superfamily protein                                                              | 5.567  | 6.47E-10 |
| At2g29720 | CTF2B (FAD/NAD(P)-binding oxidoreductase family protein); Encodes CTF2B.                               | 3.171  | 1.95E-11 |
| At2g29740 | UGT71C2 (UDP-glucosyl transferase 71C2)                                                                | 1.765  | 0.0002   |
| At2g29870 | Aquaporin-like superfamily protein                                                                     | -1.72  | 0.03085  |
| At2g30000 | PHF5-like protein                                                                                      | 2.196  | 3.87E-10 |
| At2g30020 | Protein phosphatase 2C family protein; Encodes AP2C1. Belongs to the clade B of the PP2C-superfami     | 2.565  | 3.72E-11 |
| At2g30424 | TCL2 (TRICHOMELESS 2); In a tandem repeat with AT2g30432 (TCL1) and AT2g30420 (ETC2)                   | -1.166 | 1.38E-06 |
| At2g30480 | unknown protein                                                                                        | 1.186  | 3.24E-06 |
| At2g30600 | BTB/POZ domain-containing protein                                                                      | -1.128 | 0.00034  |
| At2g31230 | ATERF15 (ethylene-responsive element binding factor 15); encodes a member of the ERF (ethylene res     | 1.727  | 6.49E-07 |
| At2g31680 | AtRABA5d (RAB GTPase homolog A5D)                                                                      | 1.053  | 8.26E-07 |
| At2g31865 | PARG2 (poly(ADP-ribose) glycohydrolase 2)                                                              | 1.563  | 0.00053  |
| At2g31880 | EVR (EVERSHED); Encodes a putative leucine rich repeat transmembrane protein that is expressed in      | 2.016  | 3.07E-06 |
| At2g31945 | unknown protein                                                                                        | 5.074  | 5.53E-10 |
| At2g31990 | Exostosin family protein                                                                               | 2.389  | 4.09E-09 |
| At2g32010 | CVL1 (CVP2 like 1); Encodes an inositol polyphosphate 5'-phosphatase (5PTase). Mediating phospho       | -1.015 | 5.05E-06 |
| At2g32020 | Acyl-CoA N-acyltransferases (NAT) superfamily protein                                                  | 2.951  | 1.06E-09 |
| At2g32030 | Acyl-CoA N-acyltransferases (NAT) superfamily protein                                                  | 5.697  | 1.91E-11 |
| At2g32100 | ATOFP16 (RABIDOPSIS THALIANA OVATE FAMILY PROTEIN 16)                                                  | -2.937 | 1.68E-07 |
| At2g32120 | HSP70T-2 (heat-shock protein 70T-2)                                                                    | 5.96   | 1.14E-11 |
| At2g32130 | Plant protein of unknown function (DUF641)                                                             | 4.277  | 1.41E-08 |
| At2g32140 | transmembrane receptors                                                                                | 4.214  | 1.76E-09 |
| At2g32190 | unknown protein                                                                                        | 2.062  | 0.00011  |
| At2g32200 | unknown protein                                                                                        | 3.368  | 4.57E-07 |
| At2g32210 | unknown protein                                                                                        | 3.473  | 1.27E-06 |
| At2g33170 | Leucine-rich repeat receptor-like protein kinase family protein                                        | -1.005 | 8.01E-05 |
| At2g33580 | Protein kinase superfamily protein                                                                     | 3.233  | 4.18E-08 |
| At2g33585 | unknown protein                                                                                        | 1.719  | 1.04E-08 |
| At2g33590 | NAD(P)-binding Rossmann-fold superfamily protein                                                       | 2.456  | 4.46E-08 |
| At2g33700 | Protein phosphatase 2C family protein                                                                  | 1.284  | 1.25E-08 |
| At2g34010 | unknown protein                                                                                        | -1.794 | 2.08E-06 |
| At2g34030 | Calcium-binding EF-hand family protein                                                                 | 1.17   | 0.0004   |
| At2g34040 | Apoptosis inhibitory protein 5 (API5)                                                                  | 1.138  | 5.00E-06 |
| At2g34390 | NIP2.1 (NOD26-like intrinsic protein 2.1); aquaporin NIP2.1                                            | -1.494 | 0.02531  |
| At2g34650 | ABR (ABRUPTUS); Encodes a protein serine/threonine kinase that may act as a positive regulator of c    | 1.215  | 5.53E-06 |
| At2g35000 | RING/U-box superfamily protein; E3 ligase-like protein induced by chitin oligomers.                    | 1.06   | 2.29E-06 |
| At2g35035 | URED (urease accessory protein D); Encodes a urease accessory protein which is essential for the activ | 1.648  | 1.33E-07 |
| At2g35658 | unknown protein                                                                                        | 4.369  | 8.50E-10 |
| At2g35710 | Nucleotide-diphospho-sugar transferases superfamily protein                                            | 3.222  | 2.98E-08 |
| At2g35930 | PUB23 (plant U-box 23); Encodes a cytoplasmically localized U-box domain containing E3 ubiquitin li    | 3.545  | 1.91E-11 |
| At2g35980 | ATNHL10 (ARABIDOPSIS NDR1/HIN1-LIKE 10); Encodes a protein whose sequence is similar to tol            | 2.78   | 0.03037  |
| At2g36050 | ATOFP15 (ARABIDOPSIS THALIANA OVATE FAMILY PROTEIN 15)                                                 | -1.03  | 9.21E-05 |
| At2g36220 | unknown protein                                                                                        | 4.049  | 5.20E-10 |
| At2g36630 | Sulfite exporter TauE/SafE family protein                                                              | -1.459 | 3.19E-06 |
| At2g36770 | UDP-Glycosyltransferase superfamily protein                                                            | 2.674  | 9.74E-10 |
| At2g36950 | Heavy metal transport/detoxification superfamily protein                                               | 1.375  | 1.93E-06 |
| At2g37430 | C2H2 and C2HC zinc fingers superfamily protein                                                         | 5.979  | 3.03E-11 |
| At2g37710 | RLK (receptor lectin kinase); Induced in response to Salicylic acid.                                   | 1.671  | 7.13E-07 |
| At2g37740 | ATZFP10 (ZINC-FINGER PROTEIN 10)                                                                       | -1.354 | 0.00496  |
| At2g37880 | Protein of unknown function, DUF617                                                                    | 1.02   | 3.92E-05 |
| At2g37940 | AtIPCS2 (Arabidopsis Inositol phosphorylceramide synthase 2); I                                        | 2.268  | 5.50E-08 |
| At2g37980 | O-fucosyltransferase family protein                                                                    | 1.34   | 2.05E-06 |
| At2g38250 | Homeodomain-like superfamily protein                                                                   | 1.855  | 1.40E-06 |
| At2g38340 | Integrase-type DNA-binding superfamily protein; encodes a member of the DREB subfamily A-2 of ER       | 4.404  | 1.01E-08 |
| At2g38470 | ATWRKY33 (WRKY DNA-BINDING PROTEIN 33); Member of the plant WRKY transcription factor                  | 4.639  | 4.21E-10 |
| At2g38790 | unknown protein                                                                                        | 2.146  | 2.03E-07 |

|           |                                                                                                        |        |          |
|-----------|--------------------------------------------------------------------------------------------------------|--------|----------|
| At2g38820 | Protein of unknown function (DUF506)                                                                   | -1.128 | 9.53E-07 |
| At2g39030 | Acyl-CoA N-acyltransferases (NAT) superfamily protein                                                  | -1.754 | 0.02572  |
| At2g39650 | Protein of unknown function (DUF506)                                                                   | 4.607  | 2.89E-10 |
| At2g39660 | BIK1 (botrytis-induced kinase1); Encodes a plasma membrane-localized ser/thr protein kinase that is a  | 1.69   | 2.71E-08 |
| At2g39681 | TAS2 (trans-acting siRNA2); Trans-acting siRNA primary transcript. RDR6-dependent trans-acting siR     | -1.049 | 2.03E-05 |
| At2g40000 | ATHSPRO2 (ARABIDOPSIS ORTHOLOG OF SUGAR BEET HS1 PRO-1 2)                                              | 3.215  | 7.43E-08 |
| At2g40090 | ATATH9 (ABC2 homolog 9); member of ATH subfamily                                                       | 1.223  | 4.50E-06 |
| At2g40095 | Alpha/beta hydrolase related protein                                                                   | 4.158  | 7.39E-11 |
| At2g40113 | Pollen Ole e 1 allergen and extensin family protein                                                    | 1.115  | 0.00045  |
| At2g40140 | SZF2 ((SALT-INDUCIBLE ZINC FINGER 2)                                                                   | 3.686  | 3.33E-09 |
| At2g40180 | ATHPP2C5 (phosphatase 2C5); Encodes PP2C5, a member of the PP2C family phosphatases. PP2C5 a           | 1.078  | 0.00115  |
| At2g40330 | PYL6 (PYR1-like 6); Encodes a member of the PYR (pyrabactin resistance )/PYL(PYR1-like)/RCAR (         | -1.796 | 9.17E-07 |
| At2g40340 | DREB2C (Integrase-type DNA-binding superfamily protein); Encodes a member of the DREB subfamil         | 3.258  | 1.96E-09 |
| At2g40435 | BEST Arabidopsis thaliana protein match is: transcription regulators (TAIR:AT3G56220.1)                | -1.043 | 0.00014  |
| At2g40475 | unknown protein                                                                                        | -1.277 | 1.79E-06 |
| At2g40610 | ATEXPA8 (expansin A8); member of Alpha-Expansin Gene Family. Naming convention from the Exp            | -1.232 | 0.0011   |
| At2g40670 | ARR16 (response regulator 16); response regulator 16                                                   | -1.101 | 3.07E-05 |
| At2g40740 | ATWRKY55 (WRKY DNA-BINDING PROTEIN 55); member of WRKY Transcription Factor; Group                     | 1.218  | 0.00249  |
| At2g41010 | ATCAMBP25 (calmodulin (CAM)-binding protein of 25 kDa); Encodes a novel calmodulin binding pro         | 2.609  | 8.95E-09 |
| At2g41100 | ATCAL4 (ARABIDOPSIS THALIANA CALMODULIN LIKE 4); encodes a calmodulin-like protein, v                  | 2.194  | 1.25E-07 |
| At2g41110 | CAM2 (calmodulin 2); Encodes a touch-inducible calmodulin that has higher affinity to kinesin-like cal | 1.183  | 1.70E-07 |
| At2g41160 | Ubiquitin-associated (UBA) protein                                                                     | 1.827  | 1.95E-09 |
| At2g41230 | unknown protein                                                                                        | -1.396 | 0.00127  |
| At2g41280 | M10; Encodes a hydrophilic protein similar to Late Embryogenesis Activated (LEA) proteins expressed    | 1.176  | 2.97E-06 |
| At2g41342 | unknown protein                                                                                        | 1.693  | 9.78E-07 |
| At2g41640 | Glycosyltransferase family 61 protein                                                                  | 3.436  | 8.19E-08 |
| At2g41800 | Protein of unknown function, DUF642                                                                    | 1.843  | 0.00121  |
| At2g41835 | zinc finger (C2H2 type, AN1-like) family protein                                                       | 3.761  | 2.04E-11 |
| At2g41940 | ZFP8 (zinc finger protein 8); Encodes a zinc finger protein containing only a single zinc finger.      | -1.104 | 2.15E-06 |
| At2g42280 | basic helix-loop-helix (bHLH) DNA-binding superfamily protein                                          | -1.286 | 8.63E-08 |
| At2g42360 | RING/U-box superfamily protein                                                                         | 1.053  | 0.0137   |
| At2g42510 | FUNCTIONS IN: molecular_function unknown; INVOLVED IN: spliceosome assembly, nuclear mRN/              | 1.005  | 0.0001   |
| At2g42870 | HLH1 (HELIX-LOOP-HELIX 1); Encodes PHYTOCHROME RAPIDLY REGULATED1 (PAR1), an a                         | -1.546 | 2.22E-05 |
| At2g42950 | Magnesium transporter CorA-like family protein                                                         | 1.595  | 6.82E-08 |
| At2g42980 | Eukaryotic aspartyl protease family protein                                                            | 2.65   | 9.33E-07 |
| At2g43000 | anac042 (NAC domain containing protein 42)                                                             | 1.714  | 0.00106  |
| At2g43120 | RmlC-like cupins superfamily protein                                                                   | 1.697  | 1.67E-05 |
| At2g43320 | S-adenosyl-L-methionine-dependent methyltransferases superfamily protein                               | 1.642  | 1.03E-06 |
| At2g43375 | other RNA                                                                                              | 1.05   | 1.02E-07 |
| At2g43445 | F-box and associated interaction domains-containing protein                                            | -1.139 | 3.93E-06 |
| At2g43500 | Plant regulator RWP-RK family protein                                                                  | 1.348  | 9.10E-06 |
| At2g43620 | Chitinase family protein                                                                               | -1.763 | 0.00243  |
| At2g44080 | ARL (ARGOS-like); Encodes ARL, a gene similar to ARGOS involved in cell expansion-dependent org        | 1.032  | 2.35E-05 |
| At2g44170 | ATNMT2 (ARABIDOPSIS N-MYRISTOYLTRANSFERASE 2)                                                          | 1.057  | 5.20E-05 |
| At2g44230 | Plant protein of unknown function (DUF946)                                                             | -1.147 | 3.58E-05 |
| At2g44460 | BGLU28 (beta glucosidase 28)                                                                           | 1.724  | 0.00023  |
| At2g44490 | BGLU26 (BETA GLUCOSIDASE 26); Encodes a glycosyl hydrolase that localizes to peroxisomes and           | 1.419  | 9.03E-07 |
| At2g44500 | O-fucosyltransferase family protein                                                                    | 2.125  | 5.42E-07 |
| At2g44578 | RING/U-box superfamily protein                                                                         | 2.412  | 1.92E-08 |
| At2g44581 | RING/U-box superfamily protein                                                                         | 1.375  | 3.20E-07 |
| At2g44600 | unknown protein                                                                                        | 1.082  | 3.36E-05 |
| At2g44840 | ATERF13 (ETHYLENE-RESPONSIVE ELEMENT BINDING FACTOR 13); encodes a member of the                       | 5.319  | 1.25E-07 |
| At2g44940 | Integrase-type DNA-binding superfamily protein; encodes a member of the DREB subfamily A-4 of ER       | -1.476 | 3.70E-07 |
| At2g45315 | other RNA; Potential natural antisense gene, locus overlaps with AT2G45310                             | -1.027 | 7.86E-06 |
| At2g45760 | BAL (BON ASSOCIATION PROTEIN 1-LIKE); encodes a protein that is similar to BONZAI1-binding             | 3.517  | 0.00253  |
| At2g45900 | Phosphatidylinositol N-acetylglucosaminyltransferase subunit P-related                                 | -1.154 | 0.00025  |
| At2g46240 | ATBAG6 (ARABIDOPSIS THALIANA BCL-2-ASSOCIATED ATHANOGENE 6); A member of Ara                           | 6.759  | 1.41E-11 |
| At2g46330 | AGP16 (arabinogalactan protein 16); Encodes arabinogalactan protein (AGP16).                           | 1.499  | 1.66E-06 |
| At2g46400 | ATWRKY46 (WRKY DNA-BINDING PROTEIN 46); member of WRKY Transcription Factor; Group                     | 4.166  | 6.67E-07 |
| At2g46410 | CPC (CAPRICE); Nuclear-localized R3-type MYB transcription factor. Positive regulator of hair-cell di  | 1.106  | 0.00026  |
| At2g46430 | ATCNGC3 (cyclic nucleotide gated channel 3); cyclic nucleotide gated channel (CNGC4), downstream       | 1.17   | 0.00054  |
| At2g46600 | Calcium-binding EF-hand family protein                                                                 | 1.211  | 5.67E-05 |
| At2g46620 | P-loop containing nucleoside triphosphate hydrolases superfamily protein                               | 1.3    | 3.01E-06 |
| At2g46660 | CYP78A6 (cytochrome P450, family 78, subfamily A, polypeptide 6); member of CYP78A                     | -1.29  | 1.70E-06 |
| At2g46690 | SAUR-like auxin-responsive protein family                                                              | -1.109 | 7.09E-06 |
| At2g46735 | unknown protein                                                                                        | 2.187  | 1.74E-05 |
| At2g46940 | unknown protein                                                                                        | 1.348  | 1.43E-05 |

|           |                                                                                                         |        |          |
|-----------|---------------------------------------------------------------------------------------------------------|--------|----------|
| At2g46970 | PIL1 (phytochrome interacting factor 3-like 1); encodes a novel Myc-related bHLH transcription factor,  | -1.008 | 0.0003   |
| At2g47060 | Protein kinase superfamily protein                                                                      | 1.933  | 2.32E-07 |
| At2g47130 | NAD(P)-binding Rossmann-fold superfamily protein                                                        | 1.574  | 0.0002   |
| At2g47140 | NAD(P)-binding Rossmann-fold superfamily protein                                                        | 3.063  | 1.71E-09 |
| At2g47150 | NAD(P)-binding Rossmann-fold superfamily protein                                                        | 1.033  | 0.00042  |
| At2g47180 | AtGolS1 (galactinol synthase 1)                                                                         | 2.25   | 7.47E-08 |
| At3g01070 | ENODL16 (early nodulin-like protein 16)                                                                 | 3.072  | 2.28E-10 |
| At3g01175 | Protein of unknown function (DUF1666)                                                                   | 1.614  | 5.12E-05 |
| At3g01190 | Peroxidase superfamily protein                                                                          | 1.576  | 0.00332  |
| At3g01290 | SPFH/Band 7/PHB domain-containing membrane-associated protein family                                    | 1.515  | 2.87E-06 |
| At3g01350 | Major facilitator superfamily protein                                                                   | -1.123 | 1.14E-07 |
| At3g01420 | ALPHA-DOX1 (alpha-dioxygenase 1); Encodes an alpha-dioxygenase involved in protection against ox        | 1.214  | 0.03576  |
| At3g02020 | AK3 (aspartate kinase 3); encodes a monofunctional aspartate kinase                                     | -1.207 | 3.29E-05 |
| At3g02170 | LNG2 (LONGIFOLIA2); Encodes LONGIFOLIA2 (LNG2). Regulates leaf morphology by promoting c                | -1.045 | 2.61E-05 |
| At3g02240 | RGF7 (root meristem growth factor 7); Encodes a root meristem growth factor (RGF). Belongs to a fan     | -1.125 | 0.02274  |
| At3g02800 | Tyrosine phosphatase family protein                                                                     | 2.466  | 1.61E-09 |
| At3g02840 | ARM repeat superfamily protein                                                                          | 5.543  | 6.69E-10 |
| At3g02990 | ATHSFA1E (heat shock transcription factor A1E); member of Heat Stress Transcription Factor (Hsf) fa     | 1.731  | 1.05E-05 |
| At3g03820 | SAUR-like auxin-responsive protein family                                                               | -2.748 | 5.59E-08 |
| At3g03840 | SAUR-like auxin-responsive protein family                                                               | -1.27  | 1.13E-05 |
| At3g03850 | SAUR-like auxin-responsive protein family                                                               | -2.462 | 3.65E-07 |
| At3g03855 | expressed protein, similar to GB:AAC72977 (Arabidopsis thaliana); pseudogene of disease resistance p    | 1.517  | 2.96E-07 |
| At3g04110 | GLR1 (GLUTAMATE RECEPTOR 1); putative glutamate receptor (GLR1.1). Contains a functional ca             | 1.513  | 1.40E-06 |
| At3g04200 | RmlC-like cupins superfamily protein                                                                    | 1.449  | 0.00031  |
| At3g04210 | Disease resistance protein (TIR-NBS class)                                                              | 1.517  | 0.00014  |
| At3g04220 | Disease resistance protein (TIR-NBS-LRR class) family                                                   | 1.699  | 9.30E-07 |
| At3g04300 | RmlC-like cupins superfamily protein                                                                    | 3.051  | 2.50E-09 |
| At3g04640 | glycine-rich protein                                                                                    | 2.572  | 5.11E-06 |
| At3g04710 | ankyrin repeat family protein                                                                           | 1.949  | 4.16E-08 |
| At3g04720 | HEL (HEVEIN-LIKE); Encodes a protein similar to the antifungal chitin-binding protein hevein from r     | -1.002 | 0.00224  |
| At3g05030 | NHX2 (sodium hydrogen exchanger 2); member of Sodium proton exchanger family                            | 1.795  | 9.04E-09 |
| At3g05120 | ATGID1A (GA INSENSITIVE DWARF1A); Encodes a gibberellin (GA) receptor ortholog of the rice C            | -1.18  | 7.56E-08 |
| At3g05200 | ATL6 (RING/U-box superfamily protein); Encodes a putative RING-H2 zinc finger protein ATL6 (ATI         | 2.491  | 1.87E-08 |
| At3g05320 | O-fucosyltransferase family protein                                                                     | 2.204  | 3.47E-07 |
| At3g05340 | Tetratricopeptide repeat (TPR)-like superfamily protein                                                 | 1.299  | 5.07E-06 |
| At3g05360 | AtRLP30 (receptor like protein 30)                                                                      | 2.08   | 1.67E-05 |
| At3g05370 | AtRLP31 (receptor like protein 31)                                                                      | 2.747  | 2.79E-08 |
| At3g05400 | Major facilitator superfamily protein                                                                   | 1.851  | 3.00E-07 |
| At3g05580 | Calcineurin-like metallo-phosphoesterase superfamily protein                                            | 1.051  | 1.08E-06 |
| At3g05820 | At-A/N-InvH (Arabidopsis alkaline/neutral invertase H); Encodes a putative plastid-targeted alkaline/ne | 1.334  | 1.08E-06 |
| At3g05905 | other RNA; Potential natural antisense gene, locus overlaps with AT3G05900                              | 1.044  | 3.01E-05 |
| At3g06070 | unknown protein                                                                                         | -1.497 | 2.44E-05 |
| At3g06660 | PAPA-1-like family protein / zinc finger (HIT type) family protein                                      | 1.078  | 7.95E-06 |
| At3g06890 | unknown protein                                                                                         | 1.696  | 2.52E-06 |
| At3g07090 | PPPDE putative thiol peptidase family protein                                                           | 3.035  | 1.75E-10 |
| At3g07150 | unknown protein                                                                                         | 4.614  | 2.24E-12 |
| At3g07195 | RPM1-interacting protein 4 (RIN4) family protein                                                        | 1.639  | 1.99E-05 |
| At3g07215 | other RNA; Unknown gene                                                                                 | 1.143  | 1.22E-06 |
| At3g08690 | UBC11 (ubiquitin-conjugating enzyme 11)                                                                 | 1.303  | 1.64E-06 |
| At3g08710 | ATH9 (thioredoxin H-type 9); Associated to plasma membrane. Moves cell to cell, suggesting a role in :  | 1.886  | 1.30E-08 |
| At3g08720 | ATPK19 (Arabidopsis thaliana protein kinase 19); Encodes a ribosomal-protein S6 kinase. Gene expres     | 3.433  | 1.06E-09 |
| At3g08760 | ATSIK (Protein kinase superfamily protein); Encodes an osmotic stress-inducible kinase that functions   | 1.489  | 1.28E-06 |
| At3g08870 | Concanavalin A-like lectin protein kinase family protein                                                | 1.826  | 1.97E-06 |
| At3g08970 | TMS1 (THERMOSENSITIVE MALE STERILE 1); J domain protein localized in ER lumen. Can comp                 | 4.614  | 4.80E-10 |
| At3g09010 | Protein kinase superfamily protein                                                                      | 1.465  | 8.11E-07 |
| At3g09020 | alpha 1,4-glycosyltransferase family protein                                                            | 2.238  | 1.53E-07 |
| At3g09032 | unknown protein                                                                                         | 2.131  | 2.76E-09 |
| At3g09280 | unknown protein                                                                                         | 1.57   | 3.13E-05 |
| At3g09350 | Fes1A (Fes1A); Encodes one of the Arabidopsis orthologs of the human Hsp70-binding protein 1 (HspI      | 3.805  | 6.64E-11 |
| At3g09440 | Heat shock protein 70 (Hsp 70) family protein                                                           | 1.074  | 9.01E-05 |
| At3g09450 | CONTAINS InterPro DOMAIN/s: Fusaric acid resistance protein, conserved region (InterPro:IPR00672        | -1.098 | 0.0004   |
| At3g09520 | ATEXO70H4 (exocyst subunit exo70 family protein H4); A member of EXO70 gene family, putative e          | 3.788  | 3.62E-10 |
| At3g09640 | APX1B (ASCORBATE PEROXIDASE 1B); Encodes a cytosolic ascorbate peroxidase APX2. Ascorba                 | 6.799  | 2.77E-10 |
| At3g09830 | Protein kinase superfamily protein                                                                      | 2.238  | 8.78E-08 |
| At3g09870 | SAUR-like auxin-responsive protein family                                                               | 5.12   | 2.56E-09 |
| At3g10020 | unknown protein                                                                                         | 2.535  | 3.62E-08 |
| At3g10040 | sequence-specific DNA binding transcription factors                                                     | -1.287 | 0.03457  |

|           |                                                                                                            |        |          |
|-----------|------------------------------------------------------------------------------------------------------------|--------|----------|
| At3g10114 | pseudogene of glycosyl hydrolase family 81 protein; pseudogene of glycosyl hydrolase family 81 protei      | 2.128  | 6.46E-09 |
| At3g10500 | anac053 (NAC domain containing protein 53)                                                                 | 1.383  | 4.53E-07 |
| At3g10525 | LGO (LOSS OF GIANT CELLS FROM ORGANS); Encodes LGO (loss of giant cells from organs) req                   | -1.041 | 0.0002   |
| At3g10640 | VPS60.1 (SNF7 family protein)                                                                              | 1.908  | 3.90E-10 |
| At3g10800 | BZIP28 (Basic-leucine zipper (bZIP) transcription factor family protein); Encodes bZIP28, a putative m     | 1.537  | 9.30E-08 |
| At3g10815 | RING/U-box superfamily protein                                                                             | 3.171  | 8.86E-09 |
| At3g10820 | Transcription elongation factor (TFIIS) family protein                                                     | 1.658  | 1.03E-07 |
| At3g10930 | unknown protein                                                                                            | 3.43   | 1.14E-11 |
| At3g10985 | ATWI-12 (ARABIDOPSIS THALIANA WOUND-INDUCED PROTEIN 12); A senescence-associated                           | 1.609  | 3.25E-06 |
| At3g11020 | DREB2 (DEHYDRATION-RESPONSIVE ELEMENT BINDING PROTEIN 2); encodes a member of t                            | 4.869  | 2.49E-11 |
| At3g11650 | NHL2 (NDR1/HIN1-like 2); Encodes a protein whose sequence is similar to tobacco hairpin-induced ge         | 1.045  | 2.16E-07 |
| At3g11820 | ATSYR1 (SYNTAXIN RELATED PROTEIN 1); Encodes a syntaxin localized at the plasma membran                    | 2.806  | 3.58E-09 |
| At3g11840 | PUB24 (plant U-box 24); Encodes a U-box-domain-containing E3 ubiquitin ligase that acts as a negativ       | 3.824  | 9.42E-10 |
| At3g12040 | DNA-3-methyladenine glycosylase (MAG)                                                                      | 1.368  | 6.20E-08 |
| At3g12050 | Aha1 domain-containing protein                                                                             | 1.749  | 9.60E-09 |
| At3g12360 | ITN1 (INCREASED TOLERANCE TO NAACL); Encodes a protein with an ankyrin motif and transmem                  | 1.028  | 3.06E-08 |
| At3g12520 | SULTR4.2 (sulfate transporter 4.2); Encodes a sulfate transporter that is induced under sulfate limitatio  | 1.562  | 2.47E-08 |
| At3g12580 | ATHSP70 (ARABIDOPSIS HEAT SHOCK PROTEIN 70)                                                                | 2.346  | 1.19E-07 |
| At3g12740 | ALIS1 (ALA-interacting subunit 1); Physically interacts with ALA3, and is required for the phospholipi     | 1.989  | 8.62E-09 |
| At3g12910 | NAC (No Apical Meristem) domain transcriptional regulator superfamily protein                              | 5.604  | 5.89E-09 |
| At3g12920 | SBP (S-ribonuclease binding protein) family protein                                                        | -1.715 | 1.55E-08 |
| At3g12960 | unknown protein                                                                                            | 1.393  | 2.27E-08 |
| At3g13229 | Plant protein of unknown function (DUF868)                                                                 | 1.029  | 4.33E-05 |
| At3g13320 | CAX2 (cation exchanger 2); low affinity calcium antiporter CAX2                                            | 1.09   | 2.80E-07 |
| At3g13435 | unknown protein                                                                                            | 1.063  | 0.00035  |
| At3g13437 | unknown protein                                                                                            | 1.252  | 8.22E-06 |
| At3g13600 | calmodulin-binding family protein                                                                          | 1.427  | 2.29E-06 |
| At3g13850 | LBD22 (LOB domain-containing protein 22)                                                                   | 1.214  | 6.73E-05 |
| At3g13980 | unknown protein                                                                                            | -1.803 | 3.82E-08 |
| At3g14050 | AT-RSH2 (RELA-SPOT HOMOLOG 2)                                                                              | 2.406  | 2.49E-07 |
| At3g14200 | Chaperone DnaJ-domain superfamily protein                                                                  | 3.848  | 2.04E-11 |
| At3g14225 | GLIP4 (GDSL-motif lipase 4); Contains lipase signature motif and GDSL domain.                              | 1.42   | 6.09E-08 |
| At3g14440 | NCED3 (nine-cis-epoxycarotenoid dioxygenase 3); Encodes 9- <i>cis</i> -epoxycarotenoid dioxygenas          | 1.49   | 0.0003   |
| At3g14560 | unknown protein                                                                                            | -1.183 | 7.29E-07 |
| At3g15210 | ATERF-4 (ETHYLENE RESPONSIVE ELEMENT BINDING FACTOR 4); Encodes a member of the I                          | 1.086  | 3.62E-06 |
| At3g15340 | PPI2 (proton pump interactor 2); Hypothetical protein similar to PPI1, a protein that interacts with the p | 4.126  | 1.51E-10 |
| At3g15356 | Legume lectin family protein                                                                               | 1.243  | 0.00027  |
| At3g15450 | Aluminium induced protein with YGL and LRDR motifs                                                         | -1.062 | 0.0006   |
| At3g15500 | ANAC055 (NAC domain containing protein 55); Encodes an ATAF-like NAC-domain transcription fac              | -1.011 | 0.01051  |
| At3g15518 | unknown protein                                                                                            | 3.631  | 1.25E-09 |
| At3g15570 | Phototropic-responsive NPH3 family protein                                                                 | -1.066 | 4.61E-06 |
| At3g15630 | unknown protein                                                                                            | -1.229 | 0.0052   |
| At3g15760 | unknown protein                                                                                            | 2.596  | 1.46E-07 |
| At3g16030 | CES101 (CALLUS EXPRESSION OF RBCS 101)                                                                     | 1.834  | 2.82E-08 |
| At3g16050 | ATPDX1.2 (ARABIDOPSIS THALIANA PYRIDOXINE BIOSYNTHESIS 1.2); Encodes a protein wit                         | 3.522  | 9.14E-11 |
| At3g16510 | Calcium-dependent lipid-binding (CaLB domain) family protein                                               | 2.32   | 9.12E-08 |
| At3g16720 | ATL2 (TOXICOS EN LEVADURA 2); RING-H2 protein induced after exposure to chitin or inactivate               | 3.319  | 7.08E-09 |
| At3g17110 | pseudogene, glycine-rich protein                                                                           | 2.079  | 1.90E-06 |
| At3g17260 | hAT-like transposase family (hobo/Ac/Tam3), has a 2.6e-27 P-value blast match to GB:CAA29005 OR            | 1.719  | 0.01254  |
| At3g17330 | ECT6 (evolutionarily conserved C-terminal region 6)                                                        | 1.728  | 2.41E-08 |
| At3g17400 | F-box family protein                                                                                       | 2.887  | 3.30E-09 |
| At3g17611 | ATRBL14 (RHOMBOID-like protein 14)                                                                         | 2.916  | 3.62E-10 |
| At3g17700 | ATCNGC20 (CYCLIC NUCLEOTIDE-GATED CHANNEL 20); cyclic nucleotide-binding transporter                       | 1.209  | 1.36E-06 |
| At3g17920 | Outer arm dynein light chain 1 protein                                                                     | 1.091  | 9.19E-08 |
| At3g18295 | Protein of unknown function (DUF1639)                                                                      | 1.169  | 4.91E-06 |
| At3g18320 | F-box and associated interaction domains-containing protein                                                | -1.381 | 1.41E-06 |
| At3g18690 | MKS1 (MAP kinase substrate 1); Encodes a nuclear-localized member of a plant specific gene family ir       | 1.595  | 1.04E-07 |
| At3g18710 | ATPUB29 (ARABIDOPSIS THALIANA PLANT U-BOX 29); Encodes a protein containing a U-box at                     | 2.443  | 3.03E-08 |
| At3g18773 | RING/U-box superfamily protein                                                                             | -1.057 | 6.58E-05 |
| At3g18950 | Transducin/WD40 repeat-like superfamily protein                                                            | 2.495  | 7.32E-08 |
| At3g19010 | 2-oxoglutarate (2OG) and Fe(II)-dependent oxygenase superfamily protein                                    | 1.661  | 3.92E-07 |
| At3g19380 | PUB25 (plant U-box 25)                                                                                     | 1.353  | 2.57E-05 |
| At3g19580 | AZF2 (zinc-finger protein 2); Encodes zinc finger protein. mRNA levels are upregulated in response to      | 1.387  | 0.0009   |
| At3g19850 | Phototropic-responsive NPH3 family protein                                                                 | -1.212 | 1.81E-06 |
| At3g19970 | alpha/beta-Hydrolases superfamily protein                                                                  | 1.233  | 1.28E-05 |
| At3g20180 | Copper transport protein family                                                                            | 3.097  | 1.75E-08 |
| At3g20395 | RING/U-box superfamily protein                                                                             | -1.13  | 0.0091   |

|           |                                                                                                           |        |          |
|-----------|-----------------------------------------------------------------------------------------------------------|--------|----------|
| At3g21070 | ATNADK-1 (NAD KINASE 1); Encodes a protein with NAD(H) kinase activity.                                   | 2.138  | 8.90E-09 |
| At3g21150 | BBX32 (B-box 32); Encodes a protein with a B-box domain predicted to act as a transcription factor. E     | 2.651  | 4.00E-05 |
| At3g21220 | ATMEK5 (ARABIDOPSIS THALIANA MITOGEN-ACTIVATED PROTEIN KINASE KINASE 5); E                                | 1.425  | 5.52E-08 |
| At3g21700 | SGP2 (Ras-related small GTP-binding family protein); Monomeric G protein. Expressed in root epiderr       | 1.451  | 9.37E-07 |
| At3g21780 | UGT71B6 (UDP-glucosyl transferase 71B6); Encodes a protein with UDP-glucosyl transferase activity         | 2.55   | 2.54E-08 |
| At3g21781 | other RNA; Potential natural antisense gene, locus overlaps with AT3G21780                                | 3.075  | 1.17E-09 |
| At3g21900 | Receptor-like protein kinase-related family protein                                                       | 1.395  | 0.00165  |
| At3g21920 | Domain of unknown function (DUF26)                                                                        | 1.351  | 6.72E-05 |
| At3g21930 | Domain of unknown function (DUF26)                                                                        | 1.375  | 0.00012  |
| At3g22060 | Receptor-like protein kinase-related family protein; contains Pfam profile: PF01657 Domain of unknow      | 1.319  | 0.00044  |
| At3g22090 | unknown protein                                                                                           | 1.257  | 1.42E-06 |
| At3g22104 | Phototropic-responsive NPH3 family protein                                                                | -1.015 | 0.0001   |
| At3g22160 | VQ motif-containing protein                                                                               | 1.964  | 2.76E-06 |
| At3g22370 | AOX1A (alternative oxidase 1A); Encodes AOX1a, an isoform of alternative oxidase that is expressed i      | 1.183  | 0.0004   |
| At3g22886 | MIR167A (microRNA167A); Encodes a microRNA that targets ARF family members ARF6 and ARF8                  | 1.791  | 2.22E-07 |
| At3g22910 | ATPase E1-E2 type family protein / haloacid dehalogenase-like hydrolase family protein                    | 3.098  | 0.00132  |
| At3g22930 | CML11 (calmodulin-like 11); Encodes a calmodulin-like protein.                                            | 2.023  | 3.80E-07 |
| At3g23030 | IAA2 (indole-3-acetic acid inducible 2); auxin inducible gene expressed in the nucleus                    | -1.227 | 3.54E-06 |
| At3g23220 | Integrase-type DNA-binding superfamily protein; encodes a member of the ERF (ethylene response fact       | 2.132  | 3.46E-08 |
| At3g23230 | Integrase-type DNA-binding superfamily protein; encodes a member of the ERF (ethylene response fact       | 6.262  | 6.47E-10 |
| At3g23240 | ATERF1 (ETHYLENE RESPONSE FACTOR 1); encodes a member of the ERF (ethylene response fac                   | 4.71   | 1.41E-09 |
| At3g23250 | ATMYB15 (MYB DOMAIN PROTEIN 15); Member of the R2R3 factor gene family.                                   | 2.889  | 3.56E-08 |
| At3g24100 | Uncharacterised protein family SERF                                                                       | 1.365  | 0.0008   |
| At3g24140 | FMA (FAMA); Encodes a basic helix-loop-helix transcription factor whose activity is required to promc     | -1.058 | 2.01E-05 |
| At3g24500 | MBF1C (multiprotein bridging factor 1C); One of three genes in A. thaliana encoding multiprotein brid     | 3.627  | 1.25E-09 |
| At3g25013 | Synaptobrevin family protein                                                                              | 1.08   | 3.84E-06 |
| At3g25230 | FKBP62 (FK506 BINDING PROTEIN 62); Encodes a a high molecular weight member of the FK506 b                | 2.095  | 5.54E-09 |
| At3g25240 | Protein of unknown function (DUF506)                                                                      | 1.384  | 0.0286   |
| At3g25250 | OXII (oxidative signal-inducible1); Arabidopsis protein kinase                                            | 6.359  | 1.14E-11 |
| At3g25590 | unknown protein                                                                                           | -1.267 | 2.83E-07 |
| At3g25600 | Calcium-binding EF-hand family protein                                                                    | 2.839  | 6.33E-09 |
| At3g25610 | ATPase E1-E2 type family protein / haloacid dehalogenase-like hydrolase family protein                    | 3.349  | 2.45E-09 |
| At3g25710 | BHLH32 (basic helix-loop-helix 32); Encodes a basic helix-loop-helix transcription factor that is expr    | -1.481 | 9.53E-07 |
| At3g25717 | DVL6 (DEVIL 6)                                                                                            | -2.387 | 6.91E-10 |
| At3g25780 | AOC3 (allene oxide cyclase 3); Encodes allene oxide cyclase, one of the enzymes involved in jasmonic      | 1.536  | 0.0002   |
| At3g25870 | unknown protein                                                                                           | -1.308 | 2.37E-08 |
| At3g26020 | Protein phosphatase 2A regulatory B subunit family protein; Encodes protein phosphatase 2A (PP2A) B       | 1.124  | 1.06E-06 |
| At3g26290 | CYP71B26 (cytochrome P450, family 71, subfamily B, polypeptide 26); putative cytochrome P450              | -1.384 | 8.36E-06 |
| At3g26470 | Powdery mildew resistance protein, RPW8 domain                                                            | 1.477  | 0.00606  |
| At3g26500 | PIRL2 (plant intracellular ras group-related LRR 2); Encodes PIRL2, a member of the Plant Intracellula    | 2.347  | 1.47E-09 |
| At3g26680 | ATSNM1 (SENSITIVE TO NITROGEN MUSTARD 1); involved in a SNM-dependent recombinationa                      | 1.351  | 1.56E-07 |
| At3g26812 | MIR169I (microRNA169I); Encodes a microRNA that targets several HAP2 family members. MicroRN              | 1.792  | 2.70E-07 |
| At3g26816 | MIR169L (microRNA169L); Encodes a microRNA that targets several HAP2 family members. MicroR               | 1.11   | 0.00038  |
| At3g26819 | MIR169N (microRNA169N); Encodes a microRNA that targets several HAP2 family members. MicroF               | 1.098  | 1.81E-05 |
| At3g26910 | hydroxyproline-rich glycoprotein family protein                                                           | 2.805  | 2.82E-08 |
| At3g26980 | MUB4 (membrane-anchored ubiquitin-fold protein 4 precursor)                                               | 1.458  | 6.95E-09 |
| At3g27027 | Protein of unknown function (DUF 3339)                                                                    | -1.194 | 1.08E-07 |
| At3g27030 | unknown protein                                                                                           | -1.173 | 3.79E-07 |
| At3g27997 | expressed protein; pseudogene of unknown protein                                                          | 1.235  | 0.00017  |
| At3g28210 | SAP12 (STRESS-ASSOCIATED PROTEIN 12); Encodes a putative zinc finger protein (PMZ).                       | 4.526  | 6.82E-08 |
| At3g28340 | GATL10 (galacturonosyltransferase-like 10); Encodes a protein with putative galacturonosyltransferase     | 4.242  | 3.94E-09 |
| At3g28420 | Putative membrane lipoprotein                                                                             | -1.68  | 8.41E-07 |
| At3g28450 | Leucine-rich repeat protein kinase family protein                                                         | 1.168  | 1.14E-07 |
| At3g28580 | P-loop containing nucleoside triphosphate hydrolases superfamily protein                                  | 2.347  | 0.00157  |
| At3g28740 | CYP81D1 (Cytochrome P450 superfamily protein); Encodes a member of the cytochrome p450 family.            | 3.008  | 1.91E-08 |
| At3g28850 | Glutaredoxin family protein                                                                               | 1.851  | 1.78E-09 |
| At3g28960 | Transmembrane amino acid transporter family protein                                                       | -1.013 | 1.86E-05 |
| At3g29000 | Calcium-binding EF-hand family protein                                                                    | 5.476  | 1.36E-11 |
| At3g29590 | AT5MAT (HXXXD-type acyl-transferase family protein); At3g29590 (At5MAT) encodes a malonyl-Cc              | -1.198 | 0.01193  |
| At3g29970 | B12D protein                                                                                              | -2.143 | 0.00265  |
| At3g30180 | BR6OX2 (brassinosteroid-6-oxidase 2); Encodes a cytochrome p450 enzyme that catalyzes the last reac       | -1.157 | 5.82E-06 |
| At3g42800 | unknown protein                                                                                           | -1.49  | 3.99E-05 |
| At3g43250 | Family of unknown function (DUF572)                                                                       | 1.869  | 2.85E-05 |
| At3g44120 | F-box and associated interaction domains-containing protein                                               | -1.179 | 2.78E-06 |
| At3g44190 | FAD/NAD(P)-binding oxidoreductase family protein                                                          | 1.407  | 1.22E-06 |
| At3g44260 | Polynucleotidyl transferase, ribonuclease H-like superfamily protein                                      | 2.529  | 1.24E-08 |
| At3g44300 | AtNIT2 (nitrilase 2); Encodes an enzyme that catalyzes the hydrolysis of indole-3-acetonitrile (IAN) to i | -1.904 | 0.00141  |

|           |                                                                                                         |        |          |
|-----------|---------------------------------------------------------------------------------------------------------|--------|----------|
| At3g44350 | anac061 (NAC domain containing protein 61)                                                              | 1.563  | 0.00088  |
| At3g44400 | Disease resistance protein (TIR-NBS-LRR class) family                                                   | 1.565  | 3.85E-06 |
| At3g44480 | RPP1 (recognition of peronospora parasitica 1); Encodes a TIR-NB-LRR R-protein RPP1 that confers re     | 1.036  | 0.0005   |
| At3g44630 | Disease resistance protein (TIR-NBS-LRR class) family                                                   | 1.834  | 6.77E-07 |
| At3g44670 | Disease resistance protein (TIR-NBS-LRR class) family                                                   | 1.347  | 4.79E-06 |
| At3g44720 | ADT4 (arogenate dehydratase 4); Encodes a plastid-localized arogenate dehydratase involved in phenyl    | 1.753  | 1.18E-06 |
| At3g45638 | other RNA; Unknown gene                                                                                 | 1.372  | 3.82E-08 |
| At3g45640 | ATMPK3 (mitogen-activated protein kinase 3); Encodes a mitogen-activated kinase whose mRNA leve         | 2.815  | 9.34E-08 |
| At3g45940 | Glycosyl hydrolases family 31 protein                                                                   | -1.173 | 0.00024  |
| At3g46070 | C2H2-type zinc finger family protein                                                                    | 1.69   | 2.44E-05 |
| At3g46080 | C2H2-type zinc finger family protein                                                                    | 4.817  | 2.03E-05 |
| At3g46090 | ZAT7 (C2H2 and C2HC zinc fingers superfamily protein)                                                   | 5.446  | 1.29E-06 |
| At3g46110 | LOCATED IN: plasma membrane (Domain of unknown function (DUF966))                                       | 2.367  | 5.02E-08 |
| At3g46130 | ATMYB48 (myb domain protein 48); Encodes a putative transcription factor (MYB48) that functions to      | -1.629 | 6.84E-07 |
| At3g46200 | aTNUDT9 (nudix hydrolase homolog 9)                                                                     | 1.019  | 3.42E-07 |
| At3g46230 | ATHSP17.4 (ARABIDOPSIS THALIANA HEAT SHOCK PROTEIN 17.4); member of the class I sma                     | 6.502  | 5.98E-10 |
| At3g46280 | protein kinase-related                                                                                  | -1.809 | 0.00567  |
| At3g46600 | GRAS family transcription factor                                                                        | 1.468  | 1.70E-07 |
| At3g46620 | zinc finger (C3HC4-type RING finger) family protein                                                     | 2.978  | 6.47E-10 |
| At3g46930 | Protein kinase superfamily protein                                                                      | 1.899  | 3.45E-08 |
| At3g47090 | Leucine-rich repeat protein kinase family protein                                                       | 1.414  | 5.22E-05 |
| At3g47210 | Plant protein of unknown function (DUF247)                                                              | 1.526  | 0.00037  |
| At3g47500 | CDF3 (cycling DOF factor 3); Dof-type zinc finger domain-containing protein, identical to H-protein pr  | -1.209 | 1.90E-07 |
| At3g47550 | RING/FYVE/PHD zinc finger superfamily protein                                                           | 2.082  | 1.76E-09 |
| At3g47600 | ATMYB94 (myb domain protein 94); Encodes a putative transcription factor (MYB94).                       | -1.09  | 6.35E-06 |
| At3g47720 | similar to RCD one 4 (SRO4); FUNCTIONS IN: NAD+ ADP-ribosyltransferase activity; INVOLVED I             | -2.32  | 0.002    |
| At3g47780 | ATATH6 (A. THALIANA ABC2 HOMOLOG 6); member of ATH subfamily                                            | 1.687  | 1.35E-05 |
| At3g47820 | PUB39 (PLANT U-BOX 39)                                                                                  | 2.053  | 1.44E-08 |
| At3g48070 | RING/U-box superfamily protein                                                                          | 1.586  | 7.08E-08 |
| At3g48090 | EDS1 (enhanced disease susceptibility 1); Component of R gene-mediated disease resistance in Arabid     | 1.394  | 0.0013   |
| At3g48240 | Octicosapeptide/Phox/Bem1p family protein                                                               | 2.264  | 2.85E-09 |
| At3g48360 | BT2 (BTB and TAZ domain protein 2); encodes a protein (BT2) that is an essential component of the T     | -2.671 | 7.61E-07 |
| At3g48640 | unknown protein                                                                                         | 3.775  | 0.0003   |
| At3g48650 | pseudogene, At14a-related protein, similar to At14a (GI:11994571 and GI:11994573) (Arabidopsis thal     | 3.55   | 6.48E-06 |
| At3g49530 | ANAC062 (NAC domain containing protein 62); Transcription factor that serves as a molecular link be     | 2.925  | 1.14E-10 |
| At3g49540 | unknown protein                                                                                         | 2.501  | 1.59E-07 |
| At3g49570 | LSU3 (RESPONSE TO LOW SULFUR 3)                                                                         | 6.436  | 5.62E-11 |
| At3g49580 | LSU1 (RESPONSE TO LOW SULFUR 1)                                                                         | 4.638  | 7.74E-09 |
| At3g49810 | ARM repeat superfamily protein                                                                          | 1.008  | 0.0084   |
| At3g50010 | Cysteine/Histidine-rich C1 domain family protein                                                        | -1.081 | 0.00525  |
| At3g50060 | MYB77 (myb domain protein 77); Encodes a member of the R2R3 transcription factor gene family. Exp       | 2.628  | 1.10E-06 |
| At3g50260 | CEJ1 (cooperatively regulated by ethylene and jasmonate 1); Encodes a member of the DREB subfamil       | 2.707  | 7.00E-08 |
| At3g50310 | MAPKKK20 (mitogen-activated protein kinase kinase kinase 20); member of MEKK subfamily                  | -1.522 | 4.11E-07 |
| At3g50570 | hydroxyproline-rich glycoprotein family protein                                                         | -1.307 | 1.66E-06 |
| At3g50800 | unknown protein                                                                                         | 2.842  | 3.30E-08 |
| At3g50930 | BCS1 (cytochrome BC1 synthesis)                                                                         | 3.039  | 1.35E-07 |
| At3g50940 | P-loop containing nucleoside triphosphate hydrolases superfamily protein                                | 1.053  | 0.00011  |
| At3g50950 | ZAR1 (HOPZ-ACTIVATED RESISTANCE 1)                                                                      | 1.563  | 9.33E-06 |
| At3g51180 | Zinc finger C-x8-C-x5-C-x3-H type family protein                                                        | 1.524  | 3.62E-06 |
| At3g51890 | Clathrin light chain protein                                                                            | 1.518  | 3.79E-07 |
| At3g51910 | AT-HSFA7A (ARABIDOPSIS THALIANA HEAT SHOCK TRANSCRIPTION FACTOR A7A); mem                               | 3.265  | 5.55E-11 |
| At3g51920 | CAM9 (calmodulin 9); encodes a divergent member of calmodulin, which is an EF-hand family of Ca2+       | 1.197  | 4.75E-06 |
| At3g52400 | SYPI22 (syntaxin of plants 122); syntaxin protein, involved in the negative regulation of defense pathw | 4.564  | 3.42E-10 |
| At3g52430 | ATPAD4 (ARABIDOPSIS PHYTOALEXIN DEFICIENT 4); Encodes a lipase-like gene that is importa                | 1.926  | 6.75E-05 |
| At3g52450 | PUB22 (plant U-box 22); Encodes a cytoplasmically localized U-box domain E3 ubiquitin ligase protei     | 1.668  | 7.47E-06 |
| At3g52520 | unknown protein                                                                                         | 1.343  | 5.70E-05 |
| At3g52800 | A20/AN1-like zinc finger family protein                                                                 | 1.752  | 1.28E-06 |
| At3g53810 | Concanavalin A-like lectin protein kinase family protein                                                | 2.726  | 7.81E-10 |
| At3g53830 | Regulator of chromosome condensation (RCC1) family protein                                              | 1.116  | 1.02E-05 |
| At3g54100 | O-fucosyltransferase family protein                                                                     | 1.182  | 1.65E-07 |
| At3g54150 | S-adenosyl-L-methionine-dependent methyltransferases superfamily protein                                | 4.445  | 1.07E-06 |
| At3g54160 | RNI-like superfamily protein                                                                            | 1.493  | 3.19E-07 |
| At3g54200 | Late embryogenesis abundant (LEA) hydroxyproline-rich glycoprotein family                               | 1.291  | 1.96E-06 |
| At3g54810 | BME3 (BLUE MICROPYLAR END 3); Encodes a protein containing a GATA type zinc finger domain               | 1.308  | 5.07E-06 |
| At3g55240 | Plant protein 1589 of unknown function; Overexpression leads to PEL (Pseudo-Etiolation in Light) phe    | -1.806 | 3.73E-05 |
| At3g55580 | Regulator of chromosome condensation (RCC1) family protein                                              | 1.351  | 1.98E-06 |
| At3g55840 | Hs1pro-1 protein                                                                                        | 4.653  | 6.14E-10 |



|           |                                                                                                                |        |          |
|-----------|----------------------------------------------------------------------------------------------------------------|--------|----------|
| At3g55880 | SUE4 (sulphate utilization efficiency 4); A gain-of-function mutant of SUE4 exhibited improved low si          | 1.046  | 0.0003   |
| At3g55980 | SZF1 (salt-inducible zinc finger 1)                                                                            | 2.041  | 0.0171   |
| At3g56200 | Transmembrane amino acid transporter family protein; Encodes a putative amino acid transporter.                | 2.744  | 1.57E-09 |
| At3g56250 | unknown protein                                                                                                | 1.408  | 3.88E-07 |
| At3g56400 | ATWRKY70 (ARABIDOPSIS THALIANA WRKY DNA-BINDING PROTEIN 70); member of WRKY                                    | 1.102  | 0.01082  |
| At3g56410 | Protein of unknown function (DUF3133)                                                                          | 1.531  | 0.0002   |
| At3g56710 | SIB1 (sigma factor binding protein 1); Sig1 binding protein; interacts with Sig1R4. As well as Sig1, Sit       | 5.203  | 1.47E-10 |
| At3g56880 | VQ motif-containing protein                                                                                    | 1.959  | 1.28E-07 |
| At3g57210 | Protein of unknown function (DUF626)                                                                           | 1.223  | 0.0006   |
| At3g57450 | unknown protein                                                                                                | 2.465  | 9.79E-09 |
| At3g57530 | CPK32 (calcium-dependent protein kinase 32); Calcium-dependent Protein Kinase. ABA signaling com               | 3.179  | 3.90E-10 |
| At3g57630 | exostosin family protein                                                                                       | 1.049  | 7.06E-07 |
| At3g57640 | Protein kinase superfamily protein                                                                             | 2.127  | 1.84E-08 |
| At3g57730 | Protein kinase superfamily protein                                                                             | 2.544  | 4.35E-09 |
| At3g57740 | Protein kinase superfamily protein                                                                             | 3.437  | 7.39E-11 |
| At3g57750 | Protein kinase superfamily protein                                                                             | 1.482  | 1.98E-07 |
| At3g57880 | Calcium-dependent lipid-binding (CaLB domain) plant phosphoribosyltransferase family protein                   | 1.408  | 6.42E-07 |
| At3g58490 | Phosphatidic acid phosphatase (PAP2) family protein                                                            | 1.245  | 1.86E-06 |
| At3g59080 | Eukaryotic aspartyl protease family protein                                                                    | 2.75   | 3.01E-07 |
| At3g59150 | F-box/RNI-like superfamily protein                                                                             | 1.044  | 1.22E-05 |
| At3g59310 | Eukaryotic protein of unknown function (DUF914)                                                                | 1.106  | 0.0001   |
| At3g59520 | ATRBL13 (RHOMBOID-like protein 13)                                                                             | 2.151  | 9.39E-09 |
| At3g59530 | LAP3 (LESS ADHERENT POLLEN 3)                                                                                  | 1.982  | 1.53E-08 |
| At3g59700 | ATHLECRK (lectin-receptor kinase); member of Receptor kinase-like protein family                               | 2.077  | 6.84E-09 |
| At3g59880 | unknown protein                                                                                                | 2.018  | 6.31E-07 |
| At3g59940 | Galactose oxidase/kelch repeat superfamily protein                                                             | -1.448 | 1.19E-06 |
| At3g60110 | DNA-binding bromodomain-containing protein                                                                     | 1.036  | 0.0004   |
| At3g60120 | BGLU27 (beta glucosidase 27)                                                                                   | 1.906  | 0.01812  |
| At3g60290 | 2-oxoglutarate (2OG) and Fe(II)-dependent oxygenase superfamily protein                                        | -1.022 | 0.00104  |
| At3g61190 | BAP1 (BON association protein 1); Encodes a protein with a C2 domain that binds to BON1 in yeast tw            | 5.38   | 4.76E-08 |
| At3g61250 | AtMYB17 (myb domain protein 17); Member of the R2R3 factor gene family.                                        | -1.261 | 0.00287  |
| At3g61900 | SAUR-like auxin-responsive protein family                                                                      | -1.021 | 6.14E-05 |
| At3g61950 | basic helix-loop-helix (bHLH) DNA-binding superfamily protein                                                  | -1.116 | 3.94E-05 |
| At3g62150 | PGP21 (P-glycoprotein 21)                                                                                      | 1.411  | 1.41E-07 |
| At3g62260 | Protein phosphatase 2C family protein                                                                          | 3.283  | 4.08E-10 |
| At3g62630 | Protein of unknown function (DUF1645)                                                                          | -1.079 | 4.51E-06 |
| At3g62720 | XT1 (xylosyltransferase 1); Encodes a protein with xylosyltransferase activity, which is specific for UD       | 1.362  | 2.89E-06 |
| At3g62780 | Calcium-dependent lipid-binding (CaLB domain) family protein                                                   | 1.127  | 9.76E-05 |
| At3g62930 | Thioredoxin superfamily protein                                                                                | -1.704 | 1.15E-06 |
| At3g63110 | ATIPT3 (isopentenyltransferase 3); Encodes cytokinin synthase involved in cytokinin biosynthesis. IPT          | -1.353 | 2.17E-05 |
| At3g63210 | MARD1 (MEDIATOR OF ABA-REGULATED DORMANCY 1); encodes a novel zinc-finger protein v                            | -1.719 | 4.34E-08 |
| At3g63310 | BIL4 (BRZ-INSENSITIVE-LONG HYPOCOTYLS 4); Mediates cell elongation in brassinosteroid sign                     | 1.342  | 2.36E-07 |
| At3g63350 | HSFA7B (HEAT SHOCK TRANSCRIPTION FACTOR A7B); member of Heat Stress Transcription F                            | 5.957  | 1.36E-10 |
| At4g00342 | unknown protein                                                                                                | 2.727  | 0.00012  |
| At4g00870 | basic helix-loop-helix (bHLH) DNA-binding superfamily protein                                                  | -1.002 | 0.00013  |
| At4g00940 | Dof-type zinc finger DNA-binding family protein                                                                | 2.003  | 3.26E-08 |
| At4g00970 | CRK41 (cysteine-rich RLK (RECEPTOR-like protein kinase) 41); Encodes a cysteine-rich receptor-like             | 2.683  | 1.08E-07 |
| At4g01010 | ATCNGC13 (CYCLIC NUCLEOTIDE-GATED CHANNEL 13); member of Cyclic nucleotide gated ch                            | 3.029  | 8.20E-09 |
| At4g01250 | WRKY22 (WRKY family transcription factor); member of WRKY Transcription Factor; Group II-e                     | 1.316  | 9.87E-05 |
| At4g01540 | ANAC068 (Arabidopsis NAC domain containing protein 68); Encodes a membrane-bound NAC (for N                    | 1.359  | 4.68E-05 |
| At4g01550 | anac069 (NAC domain containing protein 69)                                                                     | 1.017  | 4.54E-05 |
| At4g01870 | tolB protein-related                                                                                           | 1.877  | 9.48E-06 |
| At4g01950 | GPAT3 (glycerol-3-phosphate acyltransferase 3); Encodes a member of a family of proteins with glycer           | 1.336  | 1.70E-05 |
| At4g02200 | Drought-responsive family protein                                                                              | 2.611  | 2.42E-09 |
| At4g02330 | ATPMEPCRB (Plant invertase/pectin methylesterase inhibitor superfamily)                                        | 1.506  | 0.0003   |
| At4g02380 | AtLEA5 (Arabidopsis thaliana late embryogenesis abundant like 5); Encodes AtLEA5 (late embryoger               | 1.157  | 0.0002   |
| At4g02410 | Concanavalin A-like lectin protein kinase family protein                                                       | 3.029  | 1.91E-09 |
| At4g02425 | unknown protein                                                                                                | 2.031  | 4.39E-09 |
| At4g02550 | unknown protein                                                                                                | 3.256  | 1.16E-11 |
| At4g02690 | Bax inhibitor-1 family protein                                                                                 | 1.517  | 0.002    |
| At4g02950 | Ubiquitin family protein                                                                                       | 1.377  | 4.63E-07 |
| At4g03038 | other RNA; Unknown gene                                                                                        | -1.41  | 2.98E-05 |
| At4g03060 | similar to AOP3 (2-oxoglutarate-dependent dioxygenase 3), oxidoreductase, acting on paired donors, w           | -1.889 | 4.49E-07 |
| At4g03292 | Polynucleotidyl transferase, ribonuclease H-like superfamily protein                                           | 1.105  | 0.0011   |
| At4g03450 | Ankyrin repeat family protein                                                                                  | 3.125  | 0.00068  |
| At4g04020 | FIB (fibrillin); Fibrillin precursor protein. The fibrillin preprotein, but not the mature protein interacts w | 1.051  | 0.0004   |
| At4g04293 | pseudogene, similar to P0703B11.15, blastp match of 38% identity and 2.2e-25 P-value to GP 1884482             | -1.88  | 2.52E-06 |

|           |                                                                                                             |        |          |
|-----------|-------------------------------------------------------------------------------------------------------------|--------|----------|
| At4g04540 | CRK39 (cysteine-rich RLK (RECEPTOR-like protein kinase) 39); Encodes a cysteine-rich receptor-like          | 1.096  | 6.72E-06 |
| At4g04610 | APR1 (APS reductase 1); Encodes a protein disulfide isomerase-like (PDIL) protein, a member of a mu         | 3.925  | 1.88E-10 |
| At4g05010 | F-box family protein                                                                                        | 1.352  | 6.77E-08 |
| At4g08230 | glycine-rich protein                                                                                        | 1.029  | 2.27E-05 |
| At4g08320 | Tetratricopeptide repeat (TPR)-like superfamily protein                                                     | 1.242  | 1.60E-08 |
| At4g08500 | MEKK1 (MAPK/ERK kinase kinase 1); Encodes a member of the A1 subgroup of the MEKK (MAPK/                    | 1.304  | 1.28E-07 |
| At4g08555 | unknown protein                                                                                             | 2.31   | 2.19E-05 |
| At4g08770 | Peroxidase superfamily protein                                                                              | -1.247 | 0.02678  |
| At4g08910 | unknown protein                                                                                             | -1.201 | 0.00073  |
| At4g09150 | T-complex protein 11                                                                                        | 2.76   | 1.02E-09 |
| At4g09570 | CPK4 (calcium-dependent protein kinase 4); Encodes a member of Calcium Dependent Protein Kinase             | 1.907  | 1.94E-09 |
| At4g09820 | TT8 (TRANSPARENT TESTA 8); TT8 is a regulation factor that acts in a concerted action with TT1, F           | -1.098 | 0.00417  |
| At4g10250 | ATHSP22.0 (HSP20-like chaperones superfamily protein); Columbia endomembrane-localized small he             | 6.455  | 7.08E-08 |
| At4g10265 | Wound-responsive family protein                                                                             | -1.039 | 0.0255   |
| At4g10270 | Wound-responsive family protein                                                                             | -1.364 | 0.03177  |
| At4g10910 | unknown protein                                                                                             | -1.578 | 7.74E-05 |
| At4g11000 | Ankyrin repeat family protein                                                                               | 2.364  | 2.12E-08 |
| At4g11280 | ACS6 (1-aminocyclopropane-1-carboxylic acid (acc) synthase 6); encodes a a member of the 1-aminoc           | 3.487  | 3.97E-08 |
| At4g11330 | ATMPK5 (MAP kinase 5); MAP kinase                                                                           | 1.653  | 2.40E-08 |
| At4g11350 | Protein of unknown function (DUF604)                                                                        | 1.203  | 5.92E-05 |
| At4g11360 | RHA1B (RING-H2 finger A1B); Encodes a putative RING-H2 finger protein RHA1b.                                | 1.163  | 4.24E-06 |
| At4g11370 | RHA1A (RING-H2 finger A1A); Encodes a putative RING-H2 finger protein RHA1a.                                | 2.411  | 1.46E-08 |
| At4g11460 | CRK30 (cysteine-rich RLK (RECEPTOR-like protein kinase) 30); Encodes a cysteine-rich receptor-like          | -1.309 | 5.17E-05 |
| At4g11470 | CRK31 (cysteine-rich RLK (RECEPTOR-like protein kinase) 31); Encodes a cysteine-rich receptor-like          | 1.886  | 1.94E-07 |
| At4g11500 | pseudogene, similar to putative receptor-like serine-threonine protein kinase, blastp match of 59% ident    | 1.114  | 0.00114  |
| At4g11660 | HSFB2B (HEAT SHOCK TRANSCRIPTION FACTOR B2B); member of Heat Stress Transcription Fa                        | 2.808  | 5.55E-11 |
| At4g11740 | SAY1 (Ubiquitin-like superfamily protein); Isolated as a suppressor of a dominant mutant in the Ara4 g      | 1.042  | 6.34E-07 |
| At4g11850 | MEE54 (maternal effect embryo arrest 54); phospholipase D (gamma)                                           | 1.559  | 5.53E-08 |
| At4g12120 | SEC1B (Sec1/munc18-like (SM) proteins superfamily); member of KEULE Gene Family                             | 2.175  | 3.77E-09 |
| At4g12334 | Cytochrome P450 superfamily protein                                                                         | 1.462  | 3.47E-06 |
| At4g12400 | stress-inducible protein, putative                                                                          | 4.185  | 5.52E-10 |
| At4g12410 | SAUR-like auxin-responsive protein family                                                                   | 3.382  | 5.31E-10 |
| At4g12470 | AZII (azelaic acid induced 1); Encodes AZII (AZELAIC ACID INDUCED 1). Involved in the priming               | -1.504 | 0.0271   |
| At4g12480 | pEARLI 1 (Bifunctional inhibitor/lipid-transfer protein/seed storage 2S albumin superfamily protein); a     | -2.886 | 0.0035   |
| At4g12490 | Bifunctional inhibitor/lipid-transfer protein/seed storage 2S albumin superfamily protein                   | -3.419 | 0.02493  |
| At4g12500 | Bifunctional inhibitor/lipid-transfer protein/seed storage 2S albumin superfamily protein                   | -2.922 | 0.00466  |
| At4g12710 | ARM repeat superfamily protein                                                                              | 1.032  | 0.002    |
| At4g12720 | AtNUDT7 (Arabidopsis thaliana Nudix hydrolase homolog 7); Encodes a protein with ADP-ribose hydr            | 2.793  | 7.08E-08 |
| At4g13180 | NAD(P)-binding Rossmann-fold superfamily protein                                                            | 1.914  | 5.39E-08 |
| At4g13260 | YUC2 (YUCCA2)                                                                                               | -1.399 | 1.84E-08 |
| At4g13395 | DVL10 (DEVIL 10)                                                                                            | 2.167  | 6.27E-05 |
| At4g13495 | other RNA; Unknown gene                                                                                     | -1.026 | 1.50E-05 |
| At4g13820 | Leucine-rich repeat (LRR) family protein                                                                    | 1.336  | 7.27E-07 |
| At4g14090 | UDP-Glycosyltransferase superfamily protein; The At4g14090 encodes a anthocyanidin 5-O-glucosyltra          | -1.127 | 0.02095  |
| At4g14220 | RHF1A (RING-H2 group F1A); encodes a RING-type E3 ubiquitin ligase implicated in gametogenesis.             | 1.083  | 2.62E-05 |
| At4g14365 | XBAT34 (XB3 ortholog 4 in Arabidopsis thaliana)                                                             | 2.777  | 2.03E-06 |
| At4g14370 | Disease resistance protein (TIR-NBS-LRR class) family                                                       | 3.145  | 0.0001   |
| At4g14450 | unknown protein                                                                                             | 3.052  | 7.12E-09 |
| At4g14480 | Protein kinase superfamily protein                                                                          | -1.834 | 5.52E-07 |
| At4g14560 | AXR5 (AUXIN RESISTANT 5); auxin (indole-3-acetic acid) induced gene (IAA1) encoding a short-liv             | -1.048 | 7.39E-05 |
| At4g14680 | APS3 (Pseudouridine synthase/archaeosine transglycosylase-like family protein); ATP sulfurylase             | 1.571  | 8.32E-08 |
| At4g14980 | Cysteine/Histidine-rich C1 domain family protein                                                            | -3.567 | 0.0297   |
| At4g15248 | B-box type zinc finger family protein                                                                       | 3.176  | 8.93E-06 |
| At4g15420 | Ubiquitin fusion degradation UFD1 family protein                                                            | 2.224  | 1.60E-05 |
| At4g15500 | UGT84A4 (UDP-Glycosyltransferase superfamily protein); Encodes a protein that might have sinapic a          | -1.191 | 0.00013  |
| At4g15660 | Thioredoxin superfamily protein                                                                             | -1.026 | 0.00147  |
| At4g15670 | Thioredoxin superfamily protein                                                                             | -1.567 | 4.36E-06 |
| At4g15680 | Thioredoxin superfamily protein                                                                             | -1.534 | 5.66E-05 |
| At4g15700 | Thioredoxin superfamily protein                                                                             | -1.26  | 3.43E-05 |
| At4g15975 | RING/U-box superfamily protein                                                                              | 3.89   | 7.14E-10 |
| At4g16447 | unknown protein                                                                                             | -1.216 | 2.10E-07 |
| At4g16460 | unknown protein                                                                                             | 1.363  | 2.89E-05 |
| At4g16680 | P-loop containing nucleoside triphosphate hydrolases superfamily protein                                    | 1.452  | 0.00031  |
| At4g16820 | PLA-I[ $\beta$ ]2 (phospholipase A I beta 2); Encodes a lipase that hydrolyzes phosphatidylcholine, glycoli | 3.692  | 6.58E-10 |
| At4g16860 | RPP4 (recognition of peronospora parasitica 4); Confers resistance to Peronospora parasitica. RPP4 is c     | 1.1    | 1.40E-05 |
| At4g16960 | Disease resistance protein (TIR-NBS-LRR class) family                                                       | 1.094  | 8.84E-06 |
| At4g17230 | SCL13 (SCARECROW-like 13); Encodes a scarecrow-like protein (SCL13). Member of GRAS gene fa                 | 1.827  | 2.92E-07 |

|           |                                                                                                                    |        |          |
|-----------|--------------------------------------------------------------------------------------------------------------------|--------|----------|
| At4g17250 | unknown protein                                                                                                    | 3.698  | 8.66E-11 |
| At4g17490 | ATERF6 (ethylene responsive element binding factor 6); Encodes a member of the ERF (ethylene respo                 | 4.288  | 1.85E-09 |
| At4g17500 | ATERF-1 (ethylene responsive element binding factor 1); Encodes a member of the ERF (ethylene resp                 | 2.951  | 4.68E-07 |
| At4g17615 | ATCBL1 (ARABIDOPSIS THALIANA CALCINEURIN B-LIKE PROTEIN); Member of AtCBL (Calc                                    | 1.626  | 4.26E-09 |
| At4g17900 | PLATZ transcription factor family protein                                                                          | 2.641  | 2.13E-10 |
| At4g18010 | 5PTASE2 (myo-inositol polyphosphate 5-phosphatase 2); Encodes an inositol polyphosphate 5-phosph                   | 1.065  | 2.94E-06 |
| At4g18200 | NA                                                                                                                 | 2.837  | 2.20E-08 |
| At4g18250 | receptor serine/threonine kinase, putative                                                                         | 2.608  | 1.86E-07 |
| At4g18450 | Integrase-type DNA-binding superfamily protein; encodes a member of the ERF (ethylene response fact                | 1.547  | 1.21E-07 |
| At4g18880 | AT-HSFA4A (ARABIDOPSIS THALIANA HEAT SHOCK TRANSCRIPTION FACTOR A4A); mem                                          | 2.901  | 1.94E-10 |
| At4g18950 | Integrin-linked protein kinase family                                                                              | 1.353  | 1.10E-05 |
| At4g19170 | CCD4 (carotenoid cleavage dioxygenase 4); chloroplast-targeted member of a family of enzymes simil                 | -1.22  | 0.00038  |
| At4g19515 | NA                                                                                                                 | 3.417  | 8.03E-08 |
| At4g19520 | disease resistance protein (TIR-NBS-LRR class) family                                                              | 3.921  | 1.81E-08 |
| At4g19700 | RING (SBP (S-ribonuclease binding protein) family protein)                                                         | -1.943 | 4.47E-10 |
| At4g19720 | Glycosyl hydrolase family protein with chitinase insertion domain                                                  | -1.592 | 0.03681  |
| At4g20000 | VQ motif-containing protein                                                                                        | 1.061  | 0.01254  |
| At4g20780 | CML42 (calmodulin like 42); Calcium sensor involved in trichome branching.                                         | 3.438  | 4.05E-09 |
| At4g20820 | FAD-binding Berberine family protein                                                                               | 1.607  | 3.45E-07 |
| At4g20860 | FAD-binding Berberine family protein                                                                               | 2.073  | 3.18E-08 |
| At4g21120 | AAT1 (amino acid transporter 1); Encodes a member of the cationic amino acid transporter (CAT) subf                | 1.185  | 0.00149  |
| At4g21320 | HSA32 (HEAT-STRESS-ASSOCIATED 32); Encodes heat-stress-associated 32-kD protein. Up-regulat                        | 3.704  | 1.53E-09 |
| At4g21323 | Subtilase family protein                                                                                           | 4.655  | 3.21E-11 |
| At4g21390 | B120 (S-locus lectin protein kinase family protein)                                                                | 4.408  | 2.64E-10 |
| At4g21700 | Protein of unknown function (DUF2921)                                                                              | 1.323  | 6.93E-09 |
| At4g21920 | unknown protein                                                                                                    | 3.144  | 4.91E-06 |
| At4g21990 | APR3 (APS reductase 3); Encodes a protein disulfide isomerase-like (PDIL) protein, a member of a mul               | 4.459  | 4.23E-11 |
| At4g22470 | protease inhibitor/seed storage/lipid transfer protein (LTP) family protein                                        | -2.422 | 0.00067  |
| At4g22530 | S-adenosyl-L-methionine-dependent methyltransferases superfamily protein                                           | 1.511  | 1.54E-06 |
| At4g22560 | unknown protein                                                                                                    | -1.169 | 7.71E-05 |
| At4g22690 | CYP706A1 (cytochrome P450, family 706, subfamily A, polypeptide 1); member of CYP706A                              | 1.068  | 0.0001   |
| At4g22710 | CYP706A2 (cytochrome P450, family 706, subfamily A, polypeptide 2); member of CYP706A                              | 1.544  | 2.40E-07 |
| At4g22740 | glycine-rich protein                                                                                               | 1.164  | 5.20E-08 |
| At4g22780 | ACR7 (ACT domain repeat 7); Member of a family of ACT domain containing proteins . ACT domains                     | 1.113  | 0.002    |
| At4g23170 | CRK9 (CYSTEINE-RICH RLK (RECEPTOR-LIKE PROTEIN KINASE) 9); Induced in response to Sa                               | 1.93   | 3.94E-06 |
| At4g23180 | CRK10 (cysteine-rich RLK (RECEPTOR-like protein kinase) 10); Encodes a receptor-like protein kinas                 | 2.219  | 3.14E-07 |
| At4g23190 | AT-RLK3 (RECEPTOR LIKE PROTEIN KINASE 3); Encodes putative receptor-like protein kinase the                        | 3.597  | 5.16E-10 |
| At4g23200 | CRK12 (cysteine-rich RLK (RECEPTOR-like protein kinase) 12); Encodes a cysteine-rich receptor-like                 | 1.175  | 0.00464  |
| At4g23215 | pseudogene of cysteine-rich receptor-like protein kinase family protein; pseudogene of cysteine-rich rec           | 2.796  | 1.96E-07 |
| At4g23220 | CRK14 (cysteine-rich RLK (RECEPTOR-like protein kinase) 14); Encodes a cysteine-rich receptor-like                 | 2.452  | 1.14E-07 |
| At4g23270 | CRK19 (cysteine-rich RLK (RECEPTOR-like protein kinase) 19); Encodes a cysteine-rich receptor-like                 | 1.995  | 1.46E-07 |
| At4g23280 | CRK20 (cysteine-rich RLK (RECEPTOR-like protein kinase) 20); Encodes a cysteine-rich receptor-like                 | 1.258  | 2.67E-05 |
| At4g23300 | CRK22 (cysteine-rich RLK (RECEPTOR-like protein kinase) 22); Encodes a cysteine-rich receptor-like                 | -1.2   | 2.21E-05 |
| At4g23493 | unknown protein                                                                                                    | 5.676  | 1.91E-11 |
| At4g23550 | WRKY29 (WRKY family transcription factor); Encodes WRKY DNA-binding protein 29 (WRKY29).                           | -1.004 | 7.52E-06 |
| At4g23570 | SGT1A (phosphatase-related); Closely related to SGT1B, may function in SCF(TIR1) mediated protein                  | 1.698  | 4.00E-08 |
| At4g23610 | Late embryogenesis abundant (LEA) hydroxyproline-rich glycoprotein family                                          | 2.113  | 3.19E-05 |
| At4g23700 | ATCHX17 (cation/H <sup>+</sup> exchanger 17); member of Putative Na <sup>+</sup> /H <sup>+</sup> antiporter family | 1.068  | 0.00478  |
| At4g23810 | WRKY53 (WRKY family transcription factor); member of WRKY Transcription Factor; Group III                          | 2.708  | 1.30E-07 |
| At4g23880 | unknown protein                                                                                                    | 1.008  | 3.91E-07 |
| At4g23885 | unknown protein                                                                                                    | 1.464  | 4.59E-07 |
| At4g23980 | ARF9 (auxin response factor 9); Encodes auxin response factor 9 (ARF9).                                            | -1.286 | 0.01979  |
| At4g24120 | ATYSL1 (YELLOW STRIPE LIKE 1); Member of a small family of oligopeptide transporters similar to                    | -1.094 | 0.0011   |
| At4g24160 | alpha/beta-Hydrolases superfamily protein; Encodes a soluble lysophosphatidic acid acyltransferase wit             | 3.327  | 1.01E-09 |
| At4g24380 | INVOLVED IN: 10-formyltetrahydrofolate biosynthetic process, folic acid and derivative biosynthetic p              | 4.422  | 6.66E-10 |
| At4g24410 | unknown protein                                                                                                    | 2.313  | 2.00E-06 |
| At4g24415 | MIR824A (microRNA824A); Encodes a microRNA that targets AGL16. MicroRNAs are regulatory RN                         | 3.76   | 2.29E-10 |
| At4g24570 | DIC2 (dicarboxylate carrier 2); Encodes one of the mitochondrial dicarboxylate carriers (DIC): DIC1 (A             | 5.489  | 2.35E-09 |
| At4g25030 | unknown protein                                                                                                    | 1.159  | 1.58E-06 |
| At4g25200 | ATHSP23.6-MITO (mitochondrion-localized small heat shock protein 23.6); AtHSP23.6-mito mRNA, 1                     | 7.036  | 5.88E-09 |
| At4g25350 | SHB1 (SHORT HYPOCOTYL UNDER BLUE1); SHB1 encodes a nuclear and cytosolic protein that ha                           | 3.168  | 3.02E-09 |
| At4g25380 | SAP10 (stress-associated protein 10)                                                                               | 5.81   | 1.79E-10 |
| At4g25420 | ATGA20OX1 (ARABIDOPSIS THALIANA GIBBERELLIN 20-OXIDASE 1); Encodes gibberellin 20                                  | -2.167 | 2.71E-08 |
| At4g25470 | CBF2 (C-repeat/DRE binding factor 2); Encodes a member of the DREB subfamily A-1 of ERF/AP2 tra                    | 1.019  | 9.18E-05 |
| At4g25640 | ATDTX35 (detoxifying efflux carrier 35); Encodes a multidrug and toxin efflux family transporter. Invc             | 1.062  | 0.0007   |
| At4g25810 | XTH23 (xyloglucan endotransglucosylase/hydrolase 23); xyloglucan endotransglycosylase-related prote                | 2.038  | 0.00137  |
| At4g25820 | XTH14 (xyloglucan endotransglucosylase/hydrolase 14); Encodes a xyloglucan endotransglycosylase w                  | 2.382  | 0.00234  |

|           |                                                                                                         |        |          |
|-----------|---------------------------------------------------------------------------------------------------------|--------|----------|
| At4g26010 | Peroxidase superfamily protein                                                                          | 1.332  | 0.04582  |
| At4g26090 | RPS2 (RESISTANT TO P. SYRINGAE 2); Encodes a plasma membrane protein with leucine-rich repeats          | 1.134  | 0.0001   |
| At4g26120 | Ankyrin repeat family protein / BTB/POZ domain-containing protein                                       | 1.214  | 3.72E-06 |
| At4g26140 | BGAL12 (beta-galactosidase 12); putative beta-galactosidase                                             | 1.343  | 3.44E-07 |
| At4g26200 | ACS7 (1-amino-cyclopropane-1-carboxylate synthase 7); Member of a family of proteins in Arabidopsis     | 2.495  | 0.00017  |
| At4g26270 | PFK3 (phosphofructokinase 3)                                                                            | 2.019  | 1.54E-06 |
| At4g26460 | S-adenosyl-L-methionine-dependent methyltransferases superfamily protein                                | -1.483 | 0.00453  |
| At4g26580 | RING/U-box superfamily protein                                                                          | 1.738  | 2.20E-06 |
| At4g26990 | unknown protein                                                                                         | 2.028  | 4.55E-07 |
| At4g27280 | Calcium-binding EF-hand family protein                                                                  | 3.679  | 4.09E-07 |
| At4g27350 | Protein of unknown function (DUF1223)                                                                   | 1.396  | 1.33E-08 |
| At4g27360 | Dynein light chain type 1 family protein                                                                | 2.893  | 8.02E-07 |
| At4g27652 | unknown protein                                                                                         | 3.857  | 4.00E-11 |
| At4g27657 | unknown protein                                                                                         | 4.305  | 2.69E-09 |
| At4g27670 | HSP21 (heat shock protein 21); chloroplast located small heat shock protein.                            | 7.21   | 6.02E-09 |
| At4g27730 | ATOPT6 (ARABIDOPSIS THALIANA OLIGOPEPTIDE TRANSPORTER 6); oligopeptide transporter                      | -1.03  | 0.00017  |
| At4g27890 | HSP20-like chaperones superfamily protein                                                               | 1.807  | 3.05E-06 |
| At4g27940 | ATMTM1 (ARABIDOPSIS MANGANESE TRACKING FACTOR FOR MITOCHONDRIAL SOD2)                                   | 1.175  | 2.00E-07 |
| At4g27970 | SLAH2 (SLAC1 homologue 2); Encodes a protein with ten predicted transmembrane helices. The SLAH         | 1.972  | 7.34E-08 |
| At4g27980 | Domain of unknown function (DUF3444)                                                                    | 2.33   | 1.52E-08 |
| At4g28085 | unknown protein                                                                                         | 1.431  | 0.0025   |
| At4g28240 | Wound-responsive family protein                                                                         | -1.524 | 1.58E-06 |
| At4g28350 | Concanavalin A-like lectin protein kinase family protein                                                | 4.286  | 5.55E-11 |
| At4g28390 | AAC3 (ADP/ATP carrier 3); Encodes a mitochondrial ADP/ATP carrier protein. Shown in heterologous        | 1.575  | 1.08E-06 |
| At4g28400 | Protein phosphatase 2C family protein                                                                   | 2.089  | 1.09E-09 |
| At4g28460 | unknown protein                                                                                         | 1.393  | 0.00069  |
| At4g28480 | DNAJ heat shock family protein                                                                          | 1.888  | 6.58E-09 |
| At4g28490 | HAE (HAESA); member of Receptor kinase-like protein family                                              | 1.165  | 0.00023  |
| At4g28703 | RmlC-like cupins superfamily protein                                                                    | 3.653  | 3.86E-08 |
| At4g28720 | YUC8 (YUCCA 8); Auxin biosynthetic gene regulated by RVE1. Overexpression leads to suppression of       | -1.534 | 1.38E-06 |
| At4g29050 | Concanavalin A-like lectin protein kinase family protein                                                | 2.298  | 1.30E-07 |
| At4g29240 | Leucine-rich repeat (LRR) family protein                                                                | -1.159 | 0.00145  |
| At4g29330 | DER1 (DERLIN-1)                                                                                         | 1.373  | 1.09E-07 |
| At4g29340 | PRF4 (profilin 4); Profilin is a low-molecular weight, actin monomer-binding protein that regulates the | 1.575  | 1.31E-07 |
| At4g29740 | CKX4 (cytokinin oxidase 4); It encodes a protein whose sequence is similar to cytokinin oxidase/dehyd   | 1.436  | 2.86E-07 |
| At4g29770 | unknown protein; Target of trans acting-siR480/255.                                                     | 4.006  | 1.62E-10 |
| At4g29780 | unknown protein                                                                                         | 5.31   | 6.38E-09 |
| At4g30090 | emb1353 (embryo defective 1353)                                                                         | 1.048  | 0.00044  |
| At4g30100 | P-loop containing nucleoside triphosphate hydrolases superfamily protein                                | 1.024  | 7.06E-05 |
| At4g30210 | ATR2 (P450 reductase 2); Encodes NADPH-cytochrome P450 reductase that catalyzes the first oxidativ      | 1.663  | 5.54E-07 |
| At4g30240 | Syntaxin/t-SNARE family protein                                                                         | 1.024  | 4.28E-06 |
| At4g30280 | ATXTH18 (XYLOGLUCAN ENDOTRANSGLUCOSYLASE/HYDROLASE 18); Encodes a xyloglucan                            | 2.516  | 1.30E-06 |
| At4g30300 | ATNAP15 (ARABIDOPSIS THALIANA NON-INTRINSIC ABC PROTEIN 15); member of NAP subf                         | 1.407  | 5.82E-07 |
| At4g30390 | unknown protein                                                                                         | 1.394  | 5.13E-07 |
| At4g30400 | RING/U-box superfamily protein                                                                          | -1.117 | 1.27E-06 |
| At4g30430 | TET9 (tetraspanin9); Member of TETRASPANIN family                                                       | 2.878  | 1.01E-05 |
| At4g30490 | AFG1-like ATPase family protein                                                                         | 1.212  | 1.28E-06 |
| At4g30510 | ATATG18B (ARABIDOPSIS THALIANA HOMOLOG OF YEAST AUTOPHAGY 18 (ATG18) B)                                 | 1.399  | 3.48E-07 |
| At4g30850 | HHP2 (heptahelical transmembrane protein2); heptahelical transmembrane protein homologous to hum        | 1.969  | 1.26E-07 |
| At4g31398 | other RNA; Potential natural antisense gene, locus overlaps with AT4G31400                              | 1.372  | 6.77E-06 |
| At4g31500 | ATR4 (ALTERED TRYPTOPHAN REGULATION 4); Encodes an oxime-metabolizing enzyme in the                     | -1.14  | 1.63E-05 |
| At4g31550 | WRKY11 (WRKY DNA-binding protein 11); member of WRKY Transcription Factor; Group II-d; neg              | 2.58   | 1.25E-08 |
| At4g31800 | ATWRKY18 (ARABIDOPSIS THALIANA WRKY DNA-BINDING PROTEIN 18); Pathogen-induced                           | 1.451  | 2.37E-05 |
| At4g31877 | MIR156C (microRNA156C); Encodes a microRNA that targets several SPL family members, including           | 2.782  | 1.14E-08 |
| At4g31950 | CYP82C3 (cytochrome P450, family 82, subfamily C, polypeptide 3); member of CYP82C                      | 2.873  | 4.56E-06 |
| At4g31970 | CYP82C2 (cytochrome P450, family 82, subfamily C, polypeptide 2); member of CYP82C                      | 1.799  | 9.83E-06 |
| At4g32208 | heat shock protein 70 (Hsp 70) family protein                                                           | 1.407  | 4.01E-06 |
| At4g32280 | IAA29 (indole-3-acetic acid inducible 29); Auxin inducible protein.                                     | -1.313 | 0.00052  |
| At4g32300 | SD2-5 (S-domain-2 5)                                                                                    | 1.064  | 1.74E-06 |
| At4g32480 | Protein of unknown function (DUF506)                                                                    | 1.025  | 0.0171   |
| At4g32920 | glycine-rich protein                                                                                    | -1.23  | 0.0456   |
| At4g33040 | Thioredoxin superfamily protein                                                                         | 1.56   | 2.93E-06 |
| At4g33050 | EDA39 (embryo sac development arrest 39)                                                                | 2.376  | 1.06E-07 |
| At4g33060 | Cyclophilin-like peptidyl-prolyl cis-trans isomerase family protein                                     | 1.201  | 5.58E-07 |
| At4g33070 | Thiamine pyrophosphate dependent pyruvate decarboxylase family protein                                  | -2.228 | 0.00737  |
| At4g33430 | ATSERK3 (SOMATIC EMBRYOGENESIS RECEPTOR-LIKE KINASE 3); Leu-rich receptor Serine/t                      | 1.152  | 0.0002   |
| At4g33440 | Pectin lyase-like superfamily protein                                                                   | 2.29   | 6.17E-09 |

|           |                                                                                                       |        |          |
|-----------|-------------------------------------------------------------------------------------------------------|--------|----------|
| At4g33560 | Wound-responsive family protein                                                                       | -1.314 | 0.02731  |
| At4g33660 | unknown protein                                                                                       | 1.656  | 8.11E-06 |
| At4g33905 | Peroxisomal membrane 22 kDa (Mpv17/PMP22) family protein                                              | 1.307  | 3.25E-07 |
| At4g33920 | Protein phosphatase 2C family protein                                                                 | 2.686  | 1.78E-09 |
| At4g33940 | RING/U-box superfamily protein                                                                        | 1.524  | 3.76E-07 |
| At4g33985 | Protein of unknown function (DUF1685)                                                                 | 2.758  | 9.19E-11 |
| At4g34131 | UGT73B3 (UDP-glucosyl transferase 73B3)                                                               | 2.073  | 1.20E-06 |
| At4g34135 | UGT73B2 (UDP-glucosyltransferase 73B2); The At4g34135 gene encodes a flavonol 7-O-glucosyltrans       | 2.252  | 3.10E-06 |
| At4g34138 | UGT73B1 (UDP-glucosyl transferase 73B1)                                                               | 1.431  | 1.43E-06 |
| At4g34150 | Calcium-dependent lipid-binding (CaLB domain) family protein                                          | 2.908  | 2.04E-08 |
| At4g34180 | Cyclase family protein                                                                                | 1.249  | 5.02E-07 |
| At4g34300 | Cupredoxin superfamily protein; Encodes protein with 14.7% glycine residues, similar to auxin respons | 1.98   | 2.75E-06 |
| At4g34380 | Transducin/WD40 repeat-like superfamily protein                                                       | 1.103  | 9.96E-06 |
| At4g34390 | XLG2 (extra-large GTP-binding protein 2)                                                              | 2.438  | 2.19E-08 |
| At4g34410 | RRTF1 (redox responsive transcription factor 1); encodes a member of the ERF (ethylene response fact  | 1.335  | 0.00427  |
| At4g34560 | unknown protein                                                                                       | -1.091 | 1.45E-05 |
| At4g34750 | SAUR-like auxin-responsive protein family                                                             | -1.376 | 0.0002   |
| At4g34760 | SAUR-like auxin-responsive protein family                                                             | -2.294 | 1.36E-07 |
| At4g34770 | SAUR-like auxin-responsive protein family                                                             | -1.211 | 7.82E-05 |
| At4g34790 | SAUR-like auxin-responsive protein family                                                             | -1.358 | 1.43E-06 |
| At4g34800 | SAUR-like auxin-responsive protein family                                                             | -1.11  | 0.00066  |
| At4g34950 | Major facilitator superfamily protein                                                                 | -1.251 | 4.36E-05 |
| At4g35110 | Arabidopsis phospholipase-like protein (PEARLI 4) family                                              | 2.149  | 3.21E-07 |
| At4g35180 | LHT7 (LYS/HIS transporter 7)                                                                          | 1.053  | 0.02598  |
| At4g35270 | Plant regulator RWP-RK family protein                                                                 | -1.008 | 7.91E-06 |
| At4g35480 | RHA3B (RING-H2 finger A3B); Encodes a putative RING-H2 finger protein RHA3b.                          | 1.556  | 7.27E-07 |
| At4g35640 | ATSERAT3.2 (serine acetyltransferase 3.2); Encodes a cytosolic serine O-acetyltransferase involved in | 2.038  | 9.00E-07 |
| At4g35940 | unknown protein                                                                                       | 1.704  | 3.65E-07 |
| At4g36040 | Chaperone DnaJ-domain superfamily protein                                                             | -1.604 | 1.59E-07 |
| At4g36110 | SAUR-like auxin-responsive protein family                                                             | -1.414 | 2.43E-05 |
| At4g36150 | Disease resistance protein (TIR-NBS-LRR class) family                                                 | 1.296  | 4.34E-06 |
| At4g36380 | ROT3 (ROTUNDIFOLIA 3); Encodes a cytochrome P-450 gene that is involved in leaf blade expansior       | -1.143 | 6.65E-07 |
| At4g36500 | unknown protein                                                                                       | 2.421  | 1.36E-08 |
| At4g36540 | BEE2 (BR enhanced expression 2)                                                                       | -1.419 | 2.78E-07 |
| At4g36550 | ARM repeat superfamily protein                                                                        | 2.181  | 6.62E-10 |
| At4g36988 | CPuORF49 (conserved peptide upstream open reading frame 49); Upstream open reading frames (uORI       | 2.837  | 2.82E-08 |
| At4g36990 | AT-HSFB1 (ARABIDOPSIS THALIANA CLASS B HEAT SHOCK FACTOR B1); encodes a protein                       | 3.361  | 6.38E-09 |
| At4g37260 | MYB73 (myb domain protein 73); Member of the R2R3 factor gene family.                                 | 1.748  | 1.18E-07 |
| At4g37290 | unknown protein                                                                                       | 5.396  | 2.34E-09 |
| At4g37295 | unknown protein                                                                                       | -1.453 | 9.64E-05 |
| At4g37370 | CYP81D8 (cytochrome P450, family 81, subfamily D, polypeptide 8); member of CYP81D                    | 2.834  | 9.53E-08 |
| At4g37470 | alpha/beta-Hydrolases superfamily protein                                                             | -1.077 | 0.0023   |
| At4g37540 | LBD39 (LOB domain-containing protein 39)                                                              | -1.691 | 2.12E-08 |
| At4g37730 | AtbZIP7 (basic leucine-zipper 7)                                                                      | 1.234  | 5.73E-06 |
| At4g37790 | HAT22 (Homeobox-leucine zipper protein family); Encodes homeobox protein HAT22, member of the         | -1.503 | 4.82E-07 |
| At4g38560 | Arabidopsis phospholipase-like protein (PEARLI 4) family                                              | 1.956  | 1.32E-06 |
| At4g38620 | ATMYB4 (myb domain protein 4); Encodes a R2R3 MYB protein which is involved in the response to        | 1.037  | 0.00012  |
| At4g38825 | SAUR-like auxin-responsive protein family                                                             | -1.912 | 4.04E-06 |
| At4g38840 | SAUR-like auxin-responsive protein family                                                             | -2.653 | 1.78E-09 |
| At4g38850 | ATSAUR15 (ARABIDOPSIS THALIANA SMALL AUXIN UPREGULATED 15); mRNA is rapidly ir                        | -2.057 | 3.53E-07 |
| At4g38860 | SAUR-like auxin-responsive protein family                                                             | -2.747 | 2.43E-08 |
| At4g38940 | Galactose oxidase/kelch repeat superfamily protein                                                    | 2.163  | 8.49E-09 |
| At4g39030 | EDS5 (ENHANCED DISEASE SUSCEPTIBILITY 5); Encodes an orphan multidrug and toxin extrinsic             | 1.252  | 0.0031   |
| At4g39270 | Leucine-rich repeat protein kinase family protein                                                     | 1.752  | 1.60E-07 |
| At4g39580 | Galactose oxidase/kelch repeat superfamily protein                                                    | 2.379  | 1.07E-07 |
| At4g39640 | GGT1 (gamma-glutamyl transpeptidase 1); The gene encodes a gamma-glutamyltransferase (AKA gam         | 2.276  | 2.83E-09 |
| At4g39670 | Glycolipid transfer protein (GLTP) family protein                                                     | 4.695  | 7.64E-07 |
| At4g39675 | unknown protein                                                                                       | -1.131 | 0.0012   |
| At4g39780 | Integrase-type DNA-binding superfamily protein; encodes a member of the DREB subfamily A-6 of ER      | -1.699 | 1.69E-07 |
| At4g39830 | Cupredoxin superfamily protein                                                                        | 1.721  | 0.0002   |
| At4g39890 | AtRABH1c (RAB GTPase homolog H1C)                                                                     | 1.719  | 1.22E-07 |
| At4g40020 | Myosin heavy chain-related protein                                                                    | 1.253  | 0.00069  |
| At4g40065 | other RNA                                                                                             | -1.411 | 0.00019  |
| At4g40070 | RING/U-box superfamily protein                                                                        | -1.399 | 4.51E-06 |
| At4g40080 | ENTH/ANTH/VHS superfamily protein                                                                     | 2.834  | 1.20E-08 |
| At4g40090 | AGP3 (arabinogalactan protein 3)                                                                      | 2.18   | 0.00532  |
| At5g01060 | Protein kinase protein with tetratricopeptide repeat domain                                           | 2.712  | 4.06E-08 |

|           |                                                                                                                                |        |          |
|-----------|--------------------------------------------------------------------------------------------------------------------------------|--------|----------|
| At5g01100 | O-fucosyltransferase family protein                                                                                            | 3.758  | 1.35E-08 |
| At5g01180 | ATPTR5 (ARABIDOPSIS THALIANA PEPTIDE TRANSPORTER 5); Encodes a dipeptide transporter                                           | 3.483  | 2.52E-10 |
| At5g01320 | Thiamine pyrophosphate dependent pyruvate decarboxylase family protein                                                         | -1.257 | 0.00292  |
| At5g01380 | Homeodomain-like superfamily protein                                                                                           | 1.424  | 0.00194  |
| At5g01540 | LECRKA4.1 (lectin receptor kinase a4.1); Encodes LecRKA4.1, a member of the lectin receptor kinase                             | 2.982  | 5.78E-08 |
| At5g01550 | LECRKA4.2 (lectin receptor kinase a4.1); Encodes LecRKA4.2, a member of the lectin receptor kinase                             | 1.713  | 9.29E-05 |
| At5g01732 | other RNA; Potential natural antisense gene, locus overlaps with AT5G01730                                                     | 1.175  | 0.00322  |
| At5g01740 | Nuclear transport factor 2 (NTF2) family protein                                                                               | -1.652 | 0.00015  |
| At5g01830 | ARM repeat superfamily protein                                                                                                 | 1.587  | 4.43E-08 |
| At5g01880 | RING/U-box superfamily protein                                                                                                 | -1.123 | 0.0033   |
| At5g02170 | Transmembrane amino acid transporter family protein                                                                            | 1.04   | 0.00048  |
| At5g02290 | NAK (Protein kinase superfamily protein); Encodes a candidate protein kinase NAK that is similar to th                         | 1.871  | 8.56E-07 |
| At5g02480 | HSP20-like chaperones superfamily protein                                                                                      | -1.149 | 3.45E-05 |
| At5g02490 | Heat shock protein 70 (Hsp 70) family protein                                                                                  | 1.73   | 0.00014  |
| At5g02680 | LOCATED IN: endomembrane system                                                                                                | 1.478  | 1.04E-06 |
| At5g02760 | Protein phosphatase 2C family protein                                                                                          | -1.52  | 4.94E-07 |
| At5g03010 | Galactose oxidase/kelch repeat superfamily protein                                                                             | 1.525  | 1.75E-08 |
| At5g03210 | unknown protein                                                                                                                | 5.653  | 3.83E-09 |
| At5g03230 | Protein of unknown function, DUF584                                                                                            | -1.2   | 2.29E-06 |
| At5g03285 | other RNA                                                                                                                      | 1.412  | 1.75E-07 |
| At5g03340 | ATPase, AAA-type, CDC48 protein                                                                                                | 2.139  | 7.93E-09 |
| At5g03380 | Heavy metal transport/detoxification superfamily protein                                                                       | 1.954  | 1.88E-07 |
| At5g03390 | Protein of unknown function (DUF295)                                                                                           | 1.401  | 2.21E-06 |
| At5g03435 | Ca <sup>2+</sup> -dependent plant phosphoribosyltransferase family protein (Ca <sup>2+</sup> -dependent plant phosphoribosyltr | 1.152  | 3.32E-06 |
| At5g03700 | D-mannose binding lectin protein with Apple-like carbohydrate-binding domain                                                   | 1.179  | 1.51E-05 |
| At5g03990 | unknown protein                                                                                                                | 3.85   | 8.71E-11 |
| At5g04020 | calmodulin binding                                                                                                             | 1.442  | 2.83E-06 |
| At5g04190 | PKS4 (phytochrome kinase substrate 4); Encodes phytochrome kinase substrate 4, a phytochrome signa                             | -1.177 | 0.00011  |
| At5g04340 | CZF2 (COLD INDUCED ZINC FINGER PROTEIN 2); putative c2h2 zinc finger transcription factor m                                    | 6.091  | 8.07E-12 |
| At5g04410 | anac078 (Arabidopsis NAC domain containing protein 78); NAC family member, functions as a transcr                              | 1.236  | 1.99E-06 |
| At5g04610 | S-adenosyl-L-methionine-dependent methyltransferases superfamily protein                                                       | 2.61   | 1.53E-09 |
| At5g04720 | ADR1-L2 (ADR1-like 2)                                                                                                          | 1.758  | 3.39E-06 |
| At5g04840 | bZIP protein                                                                                                                   | 1.716  | 5.54E-09 |
| At5g04930 | ALA1 (aminophospholipid ATPase 1); Encodes a putative aminophospholipid translocase (p-type ATP                                | 1.644  | 1.86E-06 |
| At5g04960 | Plant invertase/pectin methylesterase inhibitor superfamily                                                                    | 1.108  | 0.0192   |
| At5g05220 | unknown protein                                                                                                                | 4.984  | 2.18E-11 |
| At5g05300 | unknown protein                                                                                                                | 4.146  | 1.05E-07 |
| At5g05320 | FAD/NAD(P)-binding oxidoreductase family protein                                                                               | 1.419  | 6.21E-07 |
| At5g05340 | Peroxidase superfamily protein                                                                                                 | -1.567 | 0.0051   |
| At5g05410 | DREB2 (DEHYDRATION-RESPONSIVE ELEMENT BINDING PROTEIN 2); Encodes a transcriptio                                               | 6.069  | 2.03E-11 |
| At5g05420 | FKBP-like peptidyl-prolyl cis-trans isomerase family protein                                                                   | -1.095 | 0.00011  |
| At5g05500 | Pollen Ole e 1 allergen and extensin family protein                                                                            | 1.547  | 0.00276  |
| At5g06320 | NHL3 (NDR1/HIN1-like 3); encodes a protein whose sequence is similar to tobacco hairpin-induced ge                             | 2.83   | 3.44E-08 |
| At5g06510 | NF-YA10 (nuclear factor Y, subunit A10)                                                                                        | -1.039 | 0.00597  |
| At5g06750 | Protein phosphatase 2C family protein                                                                                          | 1.251  | 8.22E-08 |
| At5g06820 | SRF2 (STRUBBELIG-receptor family 2)                                                                                            | 1.97   | 5.67E-08 |
| At5g07330 | unknown protein                                                                                                                | 2.813  | 1.85E-10 |
| At5g07690 | ATMYB29 (myb domain protein 29); Encodes a putative transcription factor (MYB29).                                              | -1.173 | 0.00029  |
| At5g07700 | AtMYB76 (myb domain protein 76); Encodes a putative transcription factor (MYB76).                                              | -1.522 | 1.39E-05 |
| At5g08240 | unknown protein                                                                                                                | 1.859  | 0.0001   |
| At5g08790 | anac081 (Arabidopsis NAC domain containing protein 81); induced by wounding, belongs to a large fa                             | 3.692  | 2.53E-10 |
| At5g09590 | HSC70-5 (HEAT SHOCK COGNATE); heat shock protein 70 (Hsc70-5); nuclear                                                         | 1.271  | 1.49E-06 |
| At5g09800 | ARM repeat superfamily protein                                                                                                 | 2.737  | 6.15E-09 |
| At5g09930 | ATGCN2 (ARABIDOPSIS THALIANA GENERAL CONTROL NON-REPRESSIBLE 2); member of G                                                   | 2.391  | 2.56E-07 |
| At5g10040 | unknown protein                                                                                                                | -2.629 | 0.002    |
| At5g10336 | unknown protein                                                                                                                | 1.06   | 5.36E-06 |
| At5g10380 | RING1 (RING/U-box superfamily protein); Encodes a RING finger domain protein with E3 ligase activ                              | 1.093  | 0.01385  |
| At5g10695 | unknown protein                                                                                                                | 5.67   | 7.55E-11 |
| At5g10830 | S-adenosyl-L-methionine-dependent methyltransferases superfamily protein                                                       | 2.163  | 3.98E-10 |
| At5g10970 | C2H2 and C2HC zinc fingers superfamily protein                                                                                 | -1.782 | 1.96E-09 |
| At5g10990 | SAUR-like auxin-responsive protein family                                                                                      | 2.219  | 6.24E-06 |
| At5g11100 | SYT4 (synaptotagmin 4)                                                                                                         | 1.905  | 1.55E-07 |
| At5g11140 | Arabidopsis phospholipase-like protein (PEARLI 4) family                                                                       | 2.521  | 9.14E-10 |
| At5g11250 | Disease resistance protein (TIR-NBS-LRR class)                                                                                 | 1.238  | 2.94E-06 |
| At5g11650 | alpha/beta-Hydrolases superfamily protein                                                                                      | 1.69   | 1.04E-07 |
| At5g11680 | FUNCTIONS IN: molecular_function unknown; INVOLVED IN: biological_process unknown; LOCAI                                       | 1.652  | 3.12E-08 |
| At5g11930 | Thioredoxin superfamily protein                                                                                                | 1.085  | 8.46E-05 |

|           |                                                                                                          |        |          |
|-----------|----------------------------------------------------------------------------------------------------------|--------|----------|
| At5g12020 | HSP17.6II (17.6 kDa class II heat shock protein)                                                         | 6.498  | 1.65E-09 |
| At5g12030 | AT-HSP17.6A (heat shock protein 17.6A); Encodes a cytosolic small heat shock protein with chaperone      | 6.363  | 2.42E-09 |
| At5g12110 | Glutathione S-transferase, C-terminal-like                                                               | 1.472  | 9.17E-07 |
| At5g12340 | unknown protein                                                                                          | 1.102  | 0.01623  |
| At5g12930 | unknown protein                                                                                          | 1.047  | 4.16E-06 |
| At5g13180 | ANAC083 (NAC domain containing protein 83); Encodes a NAC domain transcription factor that inter         | -1.145 | 1.18E-05 |
| At5g13190 | CONTAINS InterPro DOMAIN/s: LPS-induced tumor necrosis factor alpha factor (InterPro:IPR006629           | 2.567  | 1.40E-08 |
| At5g13200 | GRAM domain family protein                                                                               | 3.653  | 6.33E-09 |
| At5g13210 | Uncharacterised conserved protein UCP015417, vWA                                                         | 1.719  | 0.0003   |
| At5g14020 | Endosomal targeting BRO1-like domain-containing protein                                                  | 2.278  | 8.99E-09 |
| At5g14110 | Protein of unknown function (DUF 3339)                                                                   | -1.335 | 7.24E-07 |
| At5g14360 | Ubiquitin-like superfamily protein                                                                       | -1.086 | 4.91E-06 |
| At5g14410 | unknown protein                                                                                          | -1.007 | 0.0001   |
| At5g14470 | GHMP kinase family protein                                                                               | 1.043  | 0.00253  |
| At5g14700 | NAD(P)-binding Rossmann-fold superfamily protein                                                         | 2.247  | 8.43E-07 |
| At5g14730 | unknown protein                                                                                          | 1.14   | 2.04E-06 |
| At5g14930 | SAG101 (senescence-associated gene 101); encodes an acyl hydrolase involved in senescence .              | 1.074  | 0.0026   |
| At5g14940 | Major facilitator superfamily protein                                                                    | -1.343 | 1.47E-05 |
| At5g15120 | Protein of unknown function (DUF1637)                                                                    | -1.069 | 0.03417  |
| At5g15250 | FTSH6 (FTSH protease 6); Encodes an FtsH protease that is localized to the chloroplast. AtFtsH6 is inv   | 5.705  | 1.29E-13 |
| At5g15310 | ATMYB16 (myb domain protein 16); Member of the R2R3 factor gene family.                                  | -1.425 | 1.54E-06 |
| At5g15830 | AtbZIP3 (basic leucine-zipper 3)                                                                         | -1.349 | 5.14E-07 |
| At5g15870 | glycosyl hydrolase family 81 protein                                                                     | 1.057  | 1.17E-05 |
| At5g16200 | 50S ribosomal protein-related                                                                            | 1.115  | 1.00E-07 |
| At5g16640 | Pentatricopeptide repeat (PPR) superfamily protein                                                       | -1.088 | 1.55E-06 |
| At5g16960 | Zinc-binding dehydrogenase family protein                                                                | 1.144  | 6.75E-06 |
| At5g16970 | AER (alkenal reductase); encodes a 2-alkenal reductase (EC 1.3.1.74), plays a key role in the detoxifica | 1.061  | 6.79E-05 |
| At5g16980 | Zinc-binding dehydrogenase family protein                                                                | 1.429  | 2.39E-05 |
| At5g17000 | Zinc-binding dehydrogenase family protein                                                                | 1.283  | 7.22E-06 |
| At5g17350 | unknown protein                                                                                          | 3.782  | 4.34E-09 |
| At5g17820 | Peroxidase superfamily protein                                                                           | 2.913  | 0.00257  |
| At5g17860 | CAX7 (calcium exchanger 7)                                                                               | -1.527 | 1.51E-06 |
| At5g18010 | SAUR-like auxin-responsive protein family                                                                | -2.249 | 4.29E-08 |
| At5g18020 | SAUR-like auxin-responsive protein family                                                                | -3.181 | 3.88E-09 |
| At5g18030 | SAUR-like auxin-responsive protein family                                                                | -3.021 | 4.26E-09 |
| At5g18050 | SAUR-like auxin-responsive protein family                                                                | -2.408 | 1.54E-08 |
| At5g18060 | SAUR-like auxin-responsive protein family                                                                | -2.168 | 2.92E-08 |
| At5g18065 | unknown protein                                                                                          | 2.166  | 3.11E-08 |
| At5g18080 | SAUR-like auxin-responsive protein family                                                                | -2.793 | 5.39E-09 |
| At5g18150 | Methyltransferase-related protein                                                                        | 1.271  | 5.15E-07 |
| At5g18290 | SIP1B (SMALL AND BASIC INTRINSIC PROTEIN 1B); Belongs to a family of plant aquaporins.Sim                | 2.392  | 1.17E-08 |
| At5g18340 | ARM repeat superfamily protein                                                                           | 3.423  | 7.93E-11 |
| At5g18400 | Cytokine-induced anti-apoptosis inhibitor 1, Fe-S biogenesis                                             | 1.399  | 1.95E-05 |
| At5g18470 | Curculin-like (mannose-binding) lectin family protein                                                    | 2.365  | 1.34E-06 |
| At5g18490 | Plant protein of unknown function (DUF946)                                                               | 2.588  | 5.73E-11 |
| At5g18930 | BUD2 (BUSHY AND DWARF 2)                                                                                 | -1.432 | 3.10E-08 |
| At5g19190 | unknown protein                                                                                          | -1.383 | 1.89E-06 |
| At5g19230 | Glycoprotein membrane precursor GPI-anchored                                                             | 2.512  | 2.64E-08 |
| At5g19240 | Glycoprotein membrane precursor GPI-anchored                                                             | 1.482  | 9.26E-06 |
| At5g19875 | unknown protein                                                                                          | 1.121  | 6.57E-06 |
| At5g20225 | other RNA; Potential natural antisense gene, locus overlaps with AT5G20220                               | 4.892  | 2.63E-11 |
| At5g20230 | ATBCB (blue-copper-binding protein); Al-stress-induced gene                                              | 3.258  | 0.0004   |
| At5g20670 | Protein of unknown function (DUF1677)                                                                    | -1.32  | 1.67E-05 |
| At5g20790 | unknown protein                                                                                          | -1.816 | 0.00098  |
| At5g21900 | RNI-like superfamily protein                                                                             | 1.039  | 1.51E-05 |
| At5g21940 | unknown protein                                                                                          | -1.151 | 1.22E-05 |
| At5g22060 | ATJ2 (ARABIDOPSIS THALIANA DNAJ HOMOLOGUE 2); Co-chaperonin similar to E. coli DnaJ                      | 1.129  | 5.91E-06 |
| At5g22250 | Polynucleotidyl transferase, ribonuclease H-like superfamily protein                                     | 3.688  | 1.05E-10 |
| At5g22410 | RHS18 (root hair specific 18)                                                                            | 1.305  | 0.0002   |
| At5g22520 | unknown protein                                                                                          | 2.9    | 2.15E-06 |
| At5g22530 | unknown protein                                                                                          | 3.824  | 2.87E-07 |
| At5g22540 | Plant protein of unknown function (DUF247)                                                               | 3.518  | 1.21E-06 |
| At5g22630 | ADT5 (arogenate dehydratase 5); Encodes a plastid-localized arogenate dehydratase involved in phenyl     | 1.27   | 5.61E-05 |
| At5g22670 | F-box/RNI-like/FBD-like domains-containing protein                                                       | 1.874  | 2.34E-10 |
| At5g22680 | FUNCTIONS IN: molecular_function unknown; INVOLVED IN: biological_process unknown; LOCAT                 | 2.563  | 6.27E-06 |
| At5g22690 | Disease resistance protein (TIR-NBS-LRR class) family                                                    | 3.144  | 4.01E-11 |
| At5g22930 | Protein of unknown function (DUF1635)                                                                    | -1.1   | 6.06E-05 |



|           |                                                                                                           |        |          |
|-----------|-----------------------------------------------------------------------------------------------------------|--------|----------|
| At5g23480 | SWIB/MDM2 domain                                                                                          | 1.595  | 9.84E-07 |
| At5g23510 | unknown protein                                                                                           | 1.514  | 1.14E-06 |
| At5g24110 | ATWRKY30 (ARABIDOPSIS THALIANA WRKY DNA-BINDING PROTEIN 30); member of WRK'                               | 5.352  | 1.26E-10 |
| At5g24210 | alpha/beta-Hydrolases superfamily protein                                                                 | 1.298  | 0.006    |
| At5g24590 | ANAC091 (Arabidopsis NAC domain containing protein 91); Member of NAC protein family. Interacts           | 1.603  | 4.20E-07 |
| At5g24655 | LSU4 (RESPONSE TO LOW SULFUR 4)                                                                           | 3.113  | 8.31E-08 |
| At5g24660 | LSU2 (RESPONSE TO LOW SULFUR 2)                                                                           | 4.277  | 1.07E-10 |
| At5g25050 | Major facilitator superfamily protein                                                                     | 1.897  | 2.45E-09 |
| At5g25160 | ZFP3 (zinc finger protein 3); Encodes a zinc finger protein containing only a single zinc finger.         | -1.283 | 0.00013  |
| At5g25170 | PPPDE putative thiol peptidase family protein                                                             | 1.558  | 6.95E-08 |
| At5g25190 | Integrase-type DNA-binding superfamily protein; encodes a member of the ERF (ethylene response fact       | -1.512 | 7.96E-06 |
| At5g25250 | SPFH/Band 7/PHB domain-containing membrane-associated protein family                                      | 2.595  | 0.0008   |
| At5g25350 | EBF2 (EIN3-binding F box protein 2); Arabidopsis thaliana EIN3-binding F-box protein 2 (EBF2) mRN         | -1.206 | 3.38E-06 |
| At5g25440 | Protein kinase superfamily protein                                                                        | 1.427  | 0.00018  |
| At5g25450 | Cytochrome bd ubiquinol oxidase, 14kDa subunit                                                            | 3.065  | 0.00509  |
| At5g25910 | AtRLP52 (receptor like protein 52); putative disease resistance protein induced by chitin oligomers.      | 2.608  | 8.17E-09 |
| At5g25920 | BEST Arabidopsis thaliana protein match is: Eukaryotic aspartyl protease family protein (TAIR:AT3G2       | 2.797  | 3.59E-07 |
| At5g25930 | Protein kinase family protein with leucine-rich repeat domain                                             | 3.997  | 1.55E-10 |
| At5g26030 | FC1 (ferrochelatase 1); encodes ferrochelatase I located in plastids. Involved in heme biosynthesis in no | 1.758  | 8.79E-07 |
| At5g26200 | Mitochondrial substrate carrier family protein                                                            | -1.761 | 8.43E-07 |
| At5g26220 | ChaC-like family protein                                                                                  | 4.028  | 3.95E-10 |
| At5g26920 | CBP60G (Cam-binding protein 60-like G); Encodes a calmodulin-binding protein CBP60g (calmodulin           | 3.061  | 6.24E-07 |
| At5g27420 | CNI1 (carbon/nitrogen insensitive 1); Encodes CNI1 (Carbon/Nitrogen Insensitive1) (also named as AT       | 6.362  | 3.21E-11 |
| At5g27660 | Trypsin family protein with PDZ domain                                                                    | 2.728  | 4.63E-10 |
| At5g27771 | pseudogene of auxin-responsive family protein; pseudogene of auxin-responsive family protein              | -1.35  | 3.16E-05 |
| At5g27780 | SAUR-like auxin-responsive protein family                                                                 | -1.793 | 2.00E-08 |
| At5g28176 | pseudogene, hypothetical protein (transposable element gene)                                              | 2.466  | 6.58E-10 |
| At5g28300 | Duplicated homeodomain-like superfamily protein                                                           | -1.174 | 7.64E-06 |
| At5g28610 | BEST Arabidopsis thaliana protein match is: glycine-rich protein (TAIR:AT5G28630.1)                       | 2.511  | 9.94E-06 |
| At5g28630 | glycine-rich protein                                                                                      | 2.764  | 4.82E-07 |
| At5g29037 | gypsy-like retrotransposon family, has a 2.2e-209 P-value blast match to GB:AAD19359 polyprotein (g       | 1.696  | 0.00751  |
| At5g32072 | pseudogene of Glucose-6-phosphate isomerase; pseudogene of Glucose-6-phosphate isomerase                  | 1.063  | 0.00072  |
| At5g35320 | unknown protein                                                                                           | 3.863  | 3.97E-12 |
| At5g35460 | unknown protein                                                                                           | 1.133  | 1.72E-06 |
| At5g35480 | unknown protein                                                                                           | -1.278 | 0.00176  |
| At5g35735 | Auxin-responsive family protein                                                                           | 4.809  | 1.09E-09 |
| At5g36002 | other RNA; Potential natural antisense gene, locus overlaps with AT5G36001 and AT5G36000                  | 1.123  | 2.54E-05 |
| At5g36075 | MuDr-element domain (Mutator-like transposase family, has a 3.2e-61 P-value blast match to Q9S9L6 /       | -1.141 | 0.04599  |
| At5g36920 | unknown protein                                                                                           | 1.617  | 7.73E-08 |
| At5g36925 | unknown protein                                                                                           | 1.629  | 1.54E-05 |
| At5g36970 | NHL25 (NDR1/HIN1-like 25); NDR1/HIN1-like protein, expression induced during incompatible resp            | 2.464  | 2.20E-05 |
| At5g37340 | ZPR1 zinc-finger domain protein                                                                           | 2.759  | 3.21E-11 |
| At5g37400 | Family of unknown function (DUF577)                                                                       | 1.266  | 2.70E-06 |
| At5g37420 | Family of unknown function (DUF577); Note that previous reports (Plant Cell 2003,15:1538; PNAS 200        | 1.88   | 2.29E-06 |
| At5g37670 | HSP20-like chaperones superfamily protein                                                                 | 5.797  | 3.21E-11 |
| At5g37750 | Chaperone DnaJ-domain superfamily protein                                                                 | 1.104  | 2.49E-05 |
| At5g37770 | CML24 (CALMODULIN-LIKE 24); Encodes a protein with 40% similarity to calmodulin. Binds Ca(2+              | 1.886  | 1.63E-05 |
| At5g38240 | Protein kinase family protein                                                                             | 1.329  | 7.03E-07 |
| At5g38310 | unknown protein                                                                                           | 2.592  | 4.26E-09 |
| At5g38895 | RING/U-box superfamily protein                                                                            | 1.51   | 2.77E-09 |
| At5g39000 | Malectin/receptor-like protein kinase family protein                                                      | 1.002  | 0.00095  |
| At5g39020 | Malectin/receptor-like protein kinase family protein                                                      | 3.376  | 1.12E-10 |
| At5g39030 | Protein kinase superfamily protein                                                                        | 1.237  | 1.05E-05 |
| At5g39080 | HXXXD-type acyl-transferase family protein                                                                | -1.323 | 5.98E-07 |
| At5g39610 | ANAC092 (Arabidopsis NAC domain containing protein 92); Encodes a NAC-domain transcription fac            | -1.549 | 1.94E-05 |
| At5g39670 | Calcium-binding EF-hand family protein                                                                    | 3.601  | 2.73E-05 |
| At5g39785 | Protein of unknown function (DUF1666)                                                                     | 1.87   | 2.35E-07 |
| At5g39860 | BHLH136 (BASIC HELIX-LOOP-HELIX PROTEIN 136); Encodes PRE1 (PACLOBUTRAZOL RESI                            | -1.147 | 7.21E-05 |
| At5g39890 | Protein of unknown function (DUF1637)                                                                     | -1.526 | 0.0085   |
| At5g40170 | AtRLP54 (receptor like protein 54)                                                                        | 1.518  | 7.18E-07 |
| At5g40460 | unknown protein                                                                                           | 2.015  | 1.52E-08 |
| At5g40880 | WD-40 repeat family protein / zfw3 protein (ZFWD3)                                                        | 1.211  | 2.45E-05 |
| At5g41100 | FUNCTIONS IN: molecular_function unknown; INVOLVED IN: biological_process unknown; LOCAI                  | 2.038  | 8.46E-07 |
| At5g41320 | unknown protein                                                                                           | 1.022  | 9.36E-05 |
| At5g41550 | Disease resistance protein (TIR-NBS-LRR class) family                                                     | 2.268  | 2.93E-08 |
| At5g41610 | ATCHX18 (ARABIDOPSIS THALIANA CATION/H+ EXCHANGER 18); member of Putative Na+/H                           | 1.405  | 0.00011  |
| At5g41740 | Disease resistance protein (TIR-NBS-LRR class) family                                                     | 2.805  | 3.65E-07 |

|           |                                                                                                                            |        |          |
|-----------|----------------------------------------------------------------------------------------------------------------------------|--------|----------|
| At5g41750 | Disease resistance protein (TIR-NBS-LRR class) family                                                                      | 4.108  | 2.05E-07 |
| At5g41900 | alpha/beta-Hydrolases superfamily protein                                                                                  | -1.143 | 5.37E-06 |
| At5g42050 | DCD (Development and Cell Death) domain protein                                                                            | 1.981  | 5.26E-07 |
| At5g42150 | Glutathione S-transferase family protein                                                                                   | 1.119  | 2.60E-05 |
| At5g42200 | RING/U-box superfamily protein                                                                                             | -1.346 | 0.0002   |
| At5g42380 | CML37 (calmodulin like 37)                                                                                                 | 8.336  | 1.57E-08 |
| At5g42440 | Protein kinase superfamily protein                                                                                         | 1.24   | 4.62E-06 |
| At5g42510 | Disease resistance-responsive (dirigent-like protein) family protein                                                       | 1.019  | 0.01344  |
| At5g42830 | HXXXD-type acyl-transferase family protein                                                                                 | 1.445  | 6.80E-05 |
| At5g42965 | Polynucleotidyl transferase, ribonuclease H-like superfamily protein                                                       | 1.586  | 1.02E-05 |
| At5g43170 | AZF3 (zinc-finger protein 3); Encodes zinc finger protein. mRNA levels are elevated in response to high                    | 1.839  | 2.06E-07 |
| At5g43290 | ATWRKY49 (ARABIDOPSIS THALIANA WRKY DNA-BINDING PROTEIN 49); member of WRKY                                                | -1.373 | 0.00012  |
| At5g43420 | RING/U-box superfamily protein                                                                                             | 2.649  | 1.26E-07 |
| At5g43620 | Pre-mRNA cleavage complex II                                                                                               | 2.148  | 9.48E-08 |
| At5g43650 | BHLH92 (basic helix-loop-helix (bHLH) DNA-binding superfamily protein)                                                     | 1.189  | 0.00105  |
| At5g43700 | ATAUX2-11 (AUXIN INDUCIBLE 2-11); Auxin inducible protein similar to transcription factors.                                | -1.259 | 7.16E-05 |
| At5g44060 | unknown protein                                                                                                            | 3.155  | 6.11E-09 |
| At5g44065 | unknown protein                                                                                                            | 2.201  | 2.74E-09 |
| At5g44070 | ATPCS1 (ARABIDOPSIS THALIANA PHYTOCHELATIN SYNTHASE 1); Phytochelatin synthase gene                                        | 2.672  | 6.65E-09 |
| At5g44350 | ethylene-responsive nuclear protein -related                                                                               | 2.054  | 3.50E-07 |
| At5g44360 | FAD-binding Berberine family protein                                                                                       | 1.701  | 8.37E-08 |
| At5g44575 | unknown protein                                                                                                            | -1.873 | 0.0117   |
| At5g44585 | unknown protein                                                                                                            | 1.022  | 0.00414  |
| At5g44620 | CYP706A3 (cytochrome P450, family 706, subfamily A, polypeptide 3); member of CYP706A                                      | 1.388  | 1.39E-05 |
| At5g44680 | DNA glycosylase superfamily protein                                                                                        | -1.092 | 0.00027  |
| At5g44870 | Disease resistance protein (TIR-NBS-LRR class) family                                                                      | 1.47   | 1.97E-07 |
| At5g44990 | Glutathione S-transferase family protein                                                                                   | 2.417  | 1.54E-05 |
| At5g45110 | NPR3 (NPR1-like protein 3); Encodes a paralog of NPR1. Involved in negative regulation of defense re                       | 1.802  | 4.03E-08 |
| At5g45340 | CYP707A3 (cytochrome P450, family 707, subfamily A, polypeptide 3); Encodes a protein with ABA 8                           | 3.024  | 1.16E-07 |
| At5g45630 | Protein of unknown function, DUF584                                                                                        | 4.528  | 5.98E-10 |
| At5g45820 | CIPK20 (CBL-interacting protein kinase 20); Encodes a CBL-interacting serine/threonine protein kinase                      | -1.439 | 0.00013  |
| At5g46080 | Protein kinase superfamily protein                                                                                         | 3.103  | 1.41E-10 |
| At5g46170 | F-box family protein                                                                                                       | 1.512  | 1.51E-08 |
| At5g46295 | unknown protein                                                                                                            | 4.917  | 1.48E-10 |
| At5g46470 | RPS6 (RESISTANT TO P. SYRINGAE 6); Encodes RPS6 (RESISTANT TO P. SYRINGAE 6), a mem                                        | 1.464  | 6.97E-05 |
| At5g46500 | BEST Arabidopsis thaliana protein match is: disease resistance protein (TIR-NBS-LRR class) family (T                       | 1.007  | 1.34E-06 |
| At5g46510 | Disease resistance protein (TIR-NBS-LRR class) family                                                                      | 1.128  | 1.25E-07 |
| At5g46520 | Disease resistance protein (TIR-NBS-LRR class) family                                                                      | 1.126  | 1.78E-05 |
| At5g46710 | PLATZ transcription factor family protein                                                                                  | 2.693  | 6.84E-10 |
| At5g46780 | VQ motif-containing protein                                                                                                | 2.402  | 1.88E-08 |
| At5g46910 | Transcription factor jumonji (jmj) family protein / zinc finger (C5HC2 type) family protein                                | 1.982  | 5.23E-09 |
| At5g47070 | Protein kinase superfamily protein                                                                                         | 1.991  | 3.72E-08 |
| At5g47120 | ATBI-1 (ARABIDOPSIS BAX INHIBITOR 1); Encodes BI-1, a homolog of mammalian Bax inhibitor                                   | 1.747  | 1.76E-07 |
| At5g47160 | YDG/SRA domain-containing protein                                                                                          | 1.353  | 2.50E-06 |
| At5g47220 | ATERF-2 (ETHYLENE RESPONSE FACTOR- 2); Encodes a member of the ERF (ethylene response fa                                   | 2.237  | 2.95E-09 |
| At5g47230 | ATERF-5 (ETHYLENE RESPONSIVE ELEMENT BINDING FACTOR- 5); encodes a member of the                                           | 4.897  | 4.40E-09 |
| At5g47370 | HAT2 (Homeobox-leucine zipper protein 4 (HB-4) / HD-ZIP protein); homeobox-leucine zipper genes i                          | -1.78  | 7.78E-08 |
| At5g47830 | unknown protein                                                                                                            | 2.088  | 1.72E-09 |
| At5g47850 | CCR4 (CRINKLY4 related 4)                                                                                                  | 3.277  | 1.74E-09 |
| At5g47910 | RBOHD (respiratory burst oxidase homologue D); NADPH/respiratory burst oxidase protein D (RbohD                            | 2.358  | 1.74E-07 |
| At5g47960 | ATRABA4C (RAB GTPase homolog A4C); Encodes a small molecular weight g-protein.                                             | 3.592  | 6.76E-09 |
| At5g48070 | ATXTH20 (XYLOGLUCAN ENDOTRANSGLUCOSYLASE/HYDROLASE 20); putative xyloglucan                                                | 1.592  | 2.10E-06 |
| At5g48180 | NSP5 (nitrile specifier protein 5); Encodes a nitrile-specifier protein NSP5. NSP5 is one out of five (At                  | 1.094  | 3.61E-05 |
| At5g48380 | BIR1 (BAK1-interacting receptor-like kinase 1); Encodes a BAK1-interacting receptor-like kinase nam                        | 1.909  | 1.54E-08 |
| At5g48530 | unknown protein                                                                                                            | 3.045  | 1.05E-10 |
| At5g48540 | receptor-like protein kinase-related family protein                                                                        | 3.851  | 4.92E-09 |
| At5g48570 | FKBP-type peptidyl-prolyl cis-trans isomerase family protein                                                               | 3.174  | 1.96E-09 |
| At5g48610 | unknown protein                                                                                                            | 1.006  | 1.44E-05 |
| At5g48655 | RING/U-box superfamily protein                                                                                             | 1.31   | 2.86E-07 |
| At5g48657 | defense protein-related                                                                                                    | 1.474  | 0.0005   |
| At5g48850 | ATSDI1 (SULPHUR DEFICIENCY-INDUCED 1); homologous to the wheat sulphate deficiency-induc                                   | 4.162  | 1.70E-07 |
| At5g49330 | ATMYB111 (ARABIDOPSIS MYB DOMAIN PROTEIN 111); Member of the R2R3 factor gene famil                                        | -1.295 | 2.08E-06 |
| At5g49450 | AtbZIP1 (basic leucine-zipper 1)                                                                                           | 1.087  | 0.00043  |
| At5g49480 | ATCP1 (Ca <sup>2+</sup> -binding protein 1); AtCP1 encodes a novel Ca <sup>2+</sup> -binding protein, which shares sequenc | 1.149  | 8.34E-05 |
| At5g49520 | ATWRKY48 (ARABIDOPSIS THALIANA WRKY DNA-BINDING PROTEIN 48); Encodes WRKY4                                                 | 2.012  | 1.90E-07 |
| At5g49730 | ATFRO6 (ferric reduction oxidase 6); Encodes a plasma membrane-located ferric chelate reductase. Its                       | -1.626 | 0.0018   |
| At5g49740 | ATFRO7 (FERRIC REDUCTION OXIDASE 7); Encodes a chloroplast ferric chelate reductase. Shows                                 | -1.011 | 0.0053   |

|           |                                                                                                         |        |          |
|-----------|---------------------------------------------------------------------------------------------------------|--------|----------|
| At5g50120 | Transducin/WD40 repeat-like superfamily protein                                                         | -1.063 | 0.00532  |
| At5g50610 | unknown protein                                                                                         | -1.035 | 0.00115  |
| At5g50800 | Nodulin MtN3 family protein                                                                             | -1.579 | 0.00585  |
| At5g51190 | Integrase-type DNA-binding superfamily protein; encodes a member of the ERF (ethylene response fact     | 4.184  | 7.76E-07 |
| At5g51370 | RNI-like superfamily protein                                                                            | 1.17   | 4.16E-08 |
| At5g51440 | HSP20-like chaperones superfamily protein                                                               | 4.312  | 2.31E-09 |
| At5g51630 | Disease resistance protein (TIR-NBS-LRR class) family                                                   | 1.904  | 2.09E-08 |
| At5g51740 | Peptidase family M48 family protein                                                                     | 1.95   | 1.62E-09 |
| At5g52050 | MATE efflux family protein                                                                              | 1.26   | 2.03E-05 |
| At5g52250 | Transducin/WD40 repeat-like superfamily protein; Encodes a transducin protein whose gene expressior     | -1.074 | 3.44E-07 |
| At5g52640 | AtHsp90-1 (HEAT SHOCK PROTEIN 90-1); Encodes a cytosolic heat shock protein AtHSP90.1. AtH              | 3.747  | 5.48E-09 |
| At5g52740 | Copper transport protein family                                                                         | 2.187  | 1.44E-06 |
| At5g52750 | Heavy metal transport/detoxification superfamily protein                                                | 2.981  | 3.13E-08 |
| At5g52760 | Copper transport protein family                                                                         | 3.849  | 3.86E-05 |
| At5g52790 | CBS domain-containing protein with a domain of unknown function (DUF21)                                 | 2.227  | 3.17E-09 |
| At5g52900 | unknown protein                                                                                         | -2.443 | 2.99E-08 |
| At5g53048 | other RNA; Potential natural antisense gene, locus overlaps with AT5G53050                              | -1.114 | 0.0147   |
| At5g53130 | ATCNGC1 (CYCLIC NUCLEOTIDE-GATED CHANNEL 1); member of Cyclic nucleotide gated chan                     | 1.089  | 8.53E-07 |
| At5g53400 | BOB1 (BOBBER1); Encodes BOBBER1 (BOB1), a non-canonical small heat shock protein required fo            | 1.265  | 2.98E-07 |
| At5g53680 | RNA-binding (RRM/RBD/RNP motifs) family protein                                                         | 2.327  | 5.49E-11 |
| At5g54060 | UF3GT (UDP-glucose:flavonoid 3-o-glucosyltransferase)                                                   | -1.349 | 0.0229   |
| At5g54130 | Calcium-binding endonuclease/exonuclease/phosphatase family                                             | -1.155 | 0.00012  |
| At5g54145 | unknown protein                                                                                         | -2.475 | 7.57E-10 |
| At5g54165 | unknown protein                                                                                         | 7.291  | 2.21E-11 |
| At5g54490 | PBP1 (pinoid-binding protein 1); Encodes a PINOID (PID)-binding protein containing putative EF-hanc     | 4.765  | 1.68E-10 |
| At5g54585 | unknown protein                                                                                         | -1.159 | 0.0004   |
| At5g54710 | Ankyrin repeat family protein                                                                           | 2.135  | 9.30E-08 |
| At5g54720 | Ankyrin repeat family protein                                                                           | 3.594  | 3.04E-08 |
| At5g54730 | ATATG18F (ARABIDOPSIS THALIANA HOMOLOG OF YEAST AUTOPHAGY 18 (ATG18) F)                                 | 1.054  | 3.36E-05 |
| At5g54860 | Major facilitator superfamily protein                                                                   | 2.387  | 9.68E-10 |
| At5g55620 | unknown protein                                                                                         | -1.071 | 1.99E-05 |
| At5g55970 | RING/U-box superfamily protein                                                                          | 2.338  | 8.09E-07 |
| At5g56040 | Leucine-rich receptor-like protein kinase family protein                                                | -1.064 | 6.70E-07 |
| At5g56550 | ATOXS3 (OXIDATIVE STRESS 3); Encodes OXIDATIVE STRESS 3 (OXS3)&#65292; involved in t                    | -1.654 | 9.88E-08 |
| At5g56580 | ANQ1 (ARABIDOPSIS NQK1); Encodes a member of the MAP Kinase Kinase family of proteins. It ca            | 1.065  | 5.07E-05 |
| At5g56880 | unknown protein                                                                                         | 2.49   | 2.26E-07 |
| At5g56960 | basic helix-loop-helix (bHLH) DNA-binding family protein                                                | 5.692  | 5.73E-11 |
| At5g56980 | unknown protein                                                                                         | 1.053  | 0.0002   |
| At5g57010 | calmodulin-binding family protein                                                                       | 2.673  | 1.76E-05 |
| At5g57035 | U-box domain-containing protein kinase family protein                                                   | 1.295  | 1.02E-06 |
| At5g57050 | ABI2 (ABA INSENSITIVE 2); Encodes a protein phosphatase 2C and is involved in ABA signal transd         | 1.311  | 6.05E-06 |
| At5g57123 | unknown protein                                                                                         | 1.227  | 0.00218  |
| At5g57220 | CYP81F2 (cytochrome P450, family 81, subfamily F, polypeptide 2); member of CYP81F, involved in §       | 3.996  | 4.51E-09 |
| At5g57480 | P-loop containing nucleoside triphosphate hydrolases superfamily protein                                | 1.564  | 7.09E-09 |
| At5g57500 | Galactosyltransferase family protein                                                                    | 1.418  | 1.49E-08 |
| At5g57510 | unknown protein                                                                                         | 2.574  | 0.00034  |
| At5g57520 | ATZFP2 (ZINC FINGER PROTEIN 2); Encodes a zinc finger protein containing only a single zinc fing        | -1.03  | 9.11E-05 |
| At5g57560 | TCH4 (Touch 4); Encodes a cell wall-modifying enzyme, rapidly upregulated in response to environme      | 2.246  | 0.00057  |
| At5g57625 | CAP (Cysteine-rich secretory proteins, Antigen 5, and Pathogenesis-related 1 protein) superfamily prote | 1.381  | 0.0149   |
| At5g57760 | unknown protein                                                                                         | -1.541 | 1.99E-05 |
| At5g57780 | EXPRESSED IN: 18 plant structures                                                                       | -1.634 | 1.53E-06 |
| At5g57840 | HXXXD-type acyl-transferase family protein; encodes a protein whose sequence is similar to anthranila   | -1.341 | 0.03257  |
| At5g57887 | unknown protein                                                                                         | -1.003 | 4.43E-06 |
| At5g57910 | unknown protein                                                                                         | 1.146  | 2.92E-06 |
| At5g58070 | ATTIL (TEMPERATURE-INDUCED LIPOCALIN); Encodes a temperature-induced lipocalin TIL1. It                 | 1.097  | 1.82E-05 |
| At5g58120 | Disease resistance protein (TIR-NBS-LRR class) family                                                   | 2.354  | 3.60E-07 |
| At5g58360 | ATOFP3 (ARABIDOPSIS THALIANA OVATE FAMILY PROTEIN 3)                                                    | -1.404 | 1.91E-07 |
| At5g58430 | ATEXO70B1 (exocyst subunit exo70 family protein B1); A member of EXO70 gene family, putative ex         | 2.469  | 5.62E-11 |
| At5g58570 | unknown protein                                                                                         | -1.058 | 0.00045  |
| At5g58680 | ARM repeat superfamily protein                                                                          | 3.776  | 7.24E-12 |
| At5g58787 | RING/U-box superfamily protein                                                                          | 2.25   | 6.29E-11 |
| At5g58900 | Homeodomain-like transcriptional regulator                                                              | -1.139 | 4.83E-06 |
| At5g58940 | CRCK1 (calmodulin-binding receptor-like cytoplasmic kinase 1); Arabidopsis thaliana calmodulin-bind     | 1.499  | 3.35E-07 |
| At5g59070 | UDP-Glycosyltransferase superfamily protein                                                             | 2.734  | 1.36E-08 |
| At5g59360 | unknown protein                                                                                         | -1.046 | 7.97E-06 |
| At5g59450 | GRAS family transcription factor                                                                        | 1.466  | 0.0002   |
| At5g59510 | DVL18 (DEVIL 18)                                                                                        | 1.796  | 3.72E-06 |

|           |                                                                                                        |        |          |
|-----------|--------------------------------------------------------------------------------------------------------|--------|----------|
| At5g59550 | zinc finger (C3HC4-type RING finger) family protein                                                    | 2.99   | 4.95E-08 |
| At5g59720 | HSP18.2 (heat shock protein 18.2); encodes a low molecular weight heat shock protein that contains the | 3.947  | 3.08E-10 |
| At5g59730 | ATEXO70H7 (exocyst subunit exo70 family protein H7); A member of EXO70 gene family, putative e         | 2.191  | 5.25E-07 |
| At5g59780 | ATMYB59 (MYB DOMAIN PROTEIN 59); Encodes a putative transcription factor (MYB59).                      | -2.611 | 3.07E-09 |
| At5g59820 | RHL41 (RESPONSIVE TO HIGH LIGHT 41); Encodes a zinc finger protein involved in high light and          | 5.421  | 1.31E-08 |
| At5g60050 | BTB/POZ domain-containing protein                                                                      | -1.05  | 7.46E-07 |
| At5g60130 | AP2/B3-like transcriptional factor family protein                                                      | 1.497  | 7.15E-08 |
| At5g60140 | AP2/B3-like transcriptional factor family protein                                                      | -1.795 | 0.0358   |
| At5g60270 | Concanavalin A-like lectin protein kinase family protein                                               | 1.701  | 3.47E-06 |
| At5g60530 | late embryogenesis abundant protein-related / LEA protein-related                                      | 1.118  | 0.00761  |
| At5g60610 | F-box/RNI-like superfamily protein                                                                     | 1.135  | 3.05E-06 |
| At5g60800 | Heavy metal transport/detoxification superfamily protein                                               | 1.25   | 0.00018  |
| At5g60850 | OBP4 (OBF binding protein 4); Encodes a zinc finger protein.                                           | -1.288 | 5.74E-07 |
| At5g60890 | ATR1 (ALTERED TRYPTOPHAN REGULATION 1); Myb-like transcription factor that modulates ex                | -1.316 | 3.26E-06 |
| At5g61420 | HAG1 (HIGH ALIPHATIC GLUCOSINOLATE 1); Encodes a nuclear localized member of the MYB t                 | -1.597 | 1.66E-07 |
| At5g61560 | U-box domain-containing protein kinase family protein                                                  | 2.499  | 9.45E-10 |
| At5g61570 | Protein kinase superfamily protein                                                                     | -1.162 | 3.18E-06 |
| At5g61590 | Integrase-type DNA-binding superfamily protein; encodes a member of the ERF (ethylene response fact    | -1.981 | 6.20E-08 |
| At5g61600 | ERF104 (ethylene response factor 104); encodes a member of the ERF (ethylene response factor) subfa    | 3.575  | 3.53E-09 |
| At5g61900 | BON1 (BONZAI 1); Encodes a plasma-membrane localized, copine-like protein, which is a member of        | 2.092  | 1.23E-07 |
| At5g62020 | AT-HSFB2A (ARABIDOPSIS THALIANA HEAT SHOCK TRANSCRIPTION FACTOR B2A); mem                              | 3.569  | 1.24E-10 |
| At5g62280 | Protein of unknown function (DUF1442)                                                                  | -2.61  | 3.20E-07 |
| At5g62340 | Plant invertase/pectin methylesterase inhibitor superfamily protein                                    | 2.018  | 0.00721  |
| At5g62430 | CDF1 (cycling DOF factor 1); Dof-type zinc finger domain-containing protein, similar to H-protein pro  | 1.047  | 0.0001   |
| At5g62470 | ATMYB96 (MYB DOMAIN PROTEIN 96); Encodes a R2R3 type Myb transcription factor whose exp                | 1.011  | 1.13E-05 |
| At5g62520 | similar to RCD one 5 (SRO5); FUNCTIONS IN: NAD+ ADP-ribosyltransferase activity; INVOLVED I            | -1.472 | 0.01667  |
| At5g62570 | Calmodulin binding protein-like                                                                        | 2.129  | 5.37E-08 |
| At5g62620 | Galactosyltransferase family protein                                                                   | 1.228  | 1.53E-07 |
| At5g62730 | Major facilitator superfamily protein                                                                  | -1.532 | 0.00222  |
| At5g62770 | Protein of unknown function (DUF1645)                                                                  | 2.125  | 1.37E-07 |
| At5g62900 | unknown protein                                                                                        | -1.063 | 2.00E-06 |
| At5g62920 | ARR6 (response regulator 6); Encodes a Type-A response regulator that is responsive to cytokinin treat | -1.422 | 3.13E-06 |
| At5g63130 | Octicosapeptide/Phox/Bem1p family protein                                                              | 3.23   | 2.94E-09 |
| At5g63300 | Ribosomal protein S21 family protein                                                                   | 1.633  | 8.83E-07 |
| At5g63370 | Protein kinase superfamily protein                                                                     | 1.362  | 6.91E-09 |
| At5g63500 | Protein of unknown function (DUF 3339)                                                                 | 1.087  | 5.03E-06 |
| At5g63790 | ANAC102 (NAC domain containing protein 102); Encodes a member of the NAC family of transcriptic        | 2.451  | 1.87E-10 |
| At5g64190 | unknown protein                                                                                        | -1.402 | 0.00053  |
| At5g64310 | AGP1 (arabinogalactan protein 1); Encodes arabinogalactan-protein (AGP1).                              | 2.196  | 1.99E-08 |
| At5g64510 | unknown protein                                                                                        | 4.372  | 5.63E-11 |
| At5g64660 | CMPG2 (CYS, MET, PRO, and GLY protein 2)                                                               | 2.353  | 5.82E-10 |
| At5g64810 | ATWRKY51 (ARABIDOPSIS THALIANA WRKY DNA-BINDING PROTEIN 51); member of WRK'                            | 1.154  | 0.02037  |
| At5g64870 | SPFH/Band 7/PHB domain-containing membrane-associated protein family                                   | 2.777  | 8.95E-06 |
| At5g64900 | ATPEP1 (ARABIDOPSIS THALIANA PEPTIDE 1); Encodes a putative 92-aa protein that is the precu            | 1.096  | 1.43E-05 |
| At5g64905 | PROPEP3 (elicitor peptide 3 precursor)                                                                 | 2.793  | 5.41E-08 |
| At5g64950 | Mitochondrial transcription termination factor family protein                                          | 1.469  | 1.96E-07 |
| At5g65300 | unknown protein                                                                                        | 1.448  | 0.00357  |
| At5g65600 | Concanavalin A-like lectin protein kinase family protein                                               | 3.59   | 5.85E-08 |
| At5g65660 | hydroxyproline-rich glycoprotein family protein                                                        | -1.241 | 1.26E-06 |
| At5g65920 | ARM repeat superfamily protein                                                                         | 2.514  | 8.86E-09 |
| At5g66070 | RING/U-box superfamily protein                                                                         | 2.364  | 2.99E-06 |
| At5g66210 | CPK28 (calcium-dependent protein kinase 28); member of Calcium Dependent Protein Kinase                | 1.954  | 7.86E-06 |
| At5g66480 | unknown protein                                                                                        | 1.783  | 2.01E-08 |
| At5g66580 | unknown protein                                                                                        | -2.75  | 3.00E-08 |
| At5g66620 | DAR6 (DA1-related protein 6)                                                                           | 2.384  | 2.49E-07 |
| At5g66640 | DAR3 (DA1-related protein 3)                                                                           | 2.161  | 4.57E-06 |
| At5g66650 | Protein of unknown function (DUF607)                                                                   | 2.672  | 6.39E-06 |
| At5g66670 | Protein of unknown function (DUF677)                                                                   | 1.398  | 9.86E-08 |
| At5g66675 | Protein of unknown function (DUF677)                                                                   | 2.906  | 4.43E-09 |
| At5g66790 | Protein kinase superfamily protein                                                                     | 2.002  | 1.08E-07 |
| At5g66850 | MAPKKK5 (mitogen-activated protein kinase kinase kinase 5); member of MEKK subfamily                   | 1.138  | 5.93E-05 |
| At5g66880 | SNRK2-3 (SUCROSE NONFERMENTING 1 (SNF1)-RELATED PROTEIN KINASE 2-3); encodes a                         | 2.204  | 3.96E-10 |
| At5g66900 | Disease resistance protein (CC-NBS-LRR class) family                                                   | 1.525  | 4.53E-07 |
| At5g66910 | Disease resistance protein (CC-NBS-LRR class) family                                                   | 1.034  | 5.80E-07 |
| At5g66985 | unknown protein                                                                                        | -1.644 | 0.0218   |
| At5g67190 | DEAR2 (DREB and EAR motif protein 2); encodes a member of the DREB subfamily A-5 of ERF/AP2            | -1.419 | 5.45E-07 |
| At5g67310 | CYP81G1 (cytochrome P450, family 81, subfamily G, polypeptide 1); member of CYP81G                     | 1.872  | 0.00204  |

|           |                                                                                                        |        |          |
|-----------|--------------------------------------------------------------------------------------------------------|--------|----------|
| At5g67340 | ARM repeat superfamily protein                                                                         | 1.601  | 2.21E-06 |
| At5g67350 | unknown protein                                                                                        | 1.019  | 0.0001   |
| At5g67390 | unknown protein                                                                                        | -1.802 | 4.01E-06 |
| At5g67430 | Acyl-CoA N-acyltransferases (NAT) superfamily protein                                                  | 1.01   | 0.00043  |
| At5g67450 | AZF1 (zinc-finger protein 1); Encodes zinc-finger protein. mRNA levels are elevated in response to low | 3.066  | 3.48E-08 |

**List of genes significantly affected ( $P < 0.05$  and  $\log_2 \geq 1$  or  $\leq -1$ ) by allyl-ITC after 9h**

| <b>Locus ID</b> | <b>gene description (TAIR)</b>                                                                                         | <b>log2 ITC/mock 9h</b> | <b>adj.P.Val</b> |
|-----------------|------------------------------------------------------------------------------------------------------------------------|-------------------------|------------------|
| At1g01060       | LHY (LATE ELONGATED HYPOCOTYL); LHY encodes a myb-related putative transcription factor involve                        | 3.558                   | 1.40E-09         |
| At1g01190       | CYP78A8 (cytochrome P450, family 78, subfamily A, polypeptide 8); member of CYP78A                                     | -1.521                  | 4.02E-06         |
| At1g01200       | ATRAB-A3 (ARABIDOPSIS RAB GTPASE HOMOLOG A3)                                                                           | -1.178                  | 1.14E-06         |
| At1g01250       | Integrase-type DNA-binding superfamily protein; encodes a member of the DREB subfamily A-4 of ERF/AP2                  | -1.629                  | 3.46E-06         |
| At1g01300       | Eukaryotic aspartyl protease family protein                                                                            | -1.047                  | 8.01E-05         |
| At1g01340       | ATCNGC10 (cyclic nucleotide gated channel 10); member of Cyclic nucleotide gated channel family                        | 1.456                   | 7.95E-06         |
| At1g01390       | UDP-Glycosyltransferase superfamily protein                                                                            | -1.655                  | 1.71E-05         |
| At1g01420       | UGT72B3 (UDP-glucosyl transferase 72B3)                                                                                | -1.435                  | 1.42E-07         |
| At1g01430       | TBL25 (TRICHOME BIREFRINGENCE-LIKE 25); Encodes a member of the TBL (TRICHOME BIREFRIN                                 | -1.257                  | 1.84E-08         |
| At1g01520       | Homeodomain-like superfamily protein                                                                                   | 1.21                    | 0.0005           |
| At1g01560       | ATMPK11 (MAP kinase 11); member of MAP Kinase                                                                          | 4.247                   | 2.94E-07         |
| At1g01720       | ANAC002 (Arabidopsis NAC domain containing protein 2); Belongs to a large family of putative transcrip                 | 2.066                   | 1.00E-08         |
| At1g01930       | zinc finger protein-related                                                                                            | 1.31                    | 1.81E-08         |
| At1g01940       | Cyclophilin-like peptidyl-prolyl cis-trans isomerase family protein                                                    | 2.746                   | 3.80E-08         |
| At1g02000       | GAE2 (UDP-D-glucuronate 4-epimerase 2); UDP-D-glucuronate 4-epimerase                                                  | 1.272                   | 3.37E-07         |
| At1g02090       | ATCSN7 (ARABIDOPSIS THALIANA COP9 SIGNALOSOME SUBUNIT 7); encodes a phosphoprotein tha                                 | 2.374                   | 2.49E-09         |
| At1g02170       | AMC1 (metacaspase 1); Metacaspase AtMCP1b. Arginine/lysine-specific cysteine protease activity. Induces a              | 1.347                   | 3.64E-08         |
| At1g02220       | ANAC003 (NAC domain containing protein 3)                                                                              | 1.395                   | 8.43E-05         |
| At1g02230       | ANAC004 (NAC domain containing protein 4)                                                                              | 2.209                   | 2.46E-05         |
| At1g02260       | Divalent ion symporter                                                                                                 | -1.105                  | 2.73E-07         |
| At1g02300       | Cysteine proteinases superfamily protein                                                                               | -1.091                  | 5.77E-06         |
| At1g02340       | HFR1 (LONG HYPOCOTYL IN FAR-RED); Encodes a light-inducible, nuclear bHLH protein involved in ph                       | -1.553                  | 9.22E-06         |
| At1g02400       | ATGA2OX4 (Arabidopsis thaliana gibberellin 2-oxidase 4); Encodes a gibberellin 2-oxidase that acts on C19              | 2.877                   | 2.08E-09         |
| At1g02450       | NIMIN1 (NIM1-interacting 1); NIMIN1 modulates PR gene expression according the following model: NPR1                   | -1.347                  | 0.00714          |
| At1g02470       | Polyketide cyclase/dehydrase and lipid transport superfamily protein                                                   | -1.73                   | 6.12E-06         |
| At1g02590       | Aldehyde oxidase/xanthine dehydrogenase, molybdopterin binding protein                                                 | 1.63                    | 1.94E-08         |
| At1g02630       | Nucleoside transporter family protein                                                                                  | -1.207                  | 0.00151          |
| At1g02640       | ATBXL2 (BETA-XYLOSIDASE 2); encodes a protein similar to a beta-xylosidase located in the extracellular                | -1.564                  | 3.07E-07         |
| At1g02700       | unknown protein                                                                                                        | 4.353                   | 1.24E-12         |
| At1g02710       | glycine-rich protein                                                                                                   | -1.392                  | 2.12E-05         |
| At1g02750       | Drought-responsive family protein                                                                                      | 1.437                   | 3.52E-08         |
| At1g02860       | BAH1 (BENZOIC ACID HYPERSENSITIVE 1); Encodes a likely ubiquitin E3 ligase with RING and SPX do                        | 1.092                   | 8.93E-07         |
| At1g02880       | TPK1 (thiamin pyrophosphokinase1); Encodes a thiamine pyrophosphokinase capable of producing thiamine $\gamma$         | 1.139                   | 3.35E-06         |
| At1g02890       | AAA-type ATPase family protein                                                                                         | 1.449                   | 8.07E-07         |
| At1g02920       | ATGST11 (ARABIDOPSIS GLUTATHIONE S-TRANSFERASE 11); Encodes glutathione transferase belong                             | 2.149                   | 6.32E-05         |
| At1g02930       | ATGST1 (ARABIDOPSIS GLUTATHIONE S-TRANSFERASE 1); Encodes glutathione transferase belongin                             | 1.806                   | 1.82E-05         |
| At1g02980       | CUL2 (cullin 2); encodes an Arabidopsis cullin                                                                         | 3.817                   | 6.86E-09         |
| At1g03010       | Phototropic-responsive NPH3 family protein                                                                             | -1.842                  | 6.59E-08         |
| At1g03055       | unknown protein                                                                                                        | 1.101                   | 0.00077          |
| At1g03070       | Bax inhibitor-1 family protein                                                                                         | 8.217                   | 1.53E-13         |
| At1g03180       | unknown protein                                                                                                        | 2.373                   | 2.90E-09         |
| At1g03190       | ATXPD (ARABIDOPSIS THALIANA XERODERMA PIGMENTOSUM GROUP D); UV damage and heat i                                       | 1.135                   | 1.78E-07         |
| At1g03220       | Eukaryotic aspartyl protease family protein                                                                            | 2.453                   | 2.93E-09         |
| At1g03230       | Eukaryotic aspartyl protease family protein                                                                            | 2.041                   | 1.57E-09         |
| At1g03300       | ATDUF1 (DOMAIN OF UNKNOWN FUNCTION 724 1); Member of the plant-specific DUF724 protein fam                             | -1.079                  | 4.23E-06         |
| At1g03520       | Core-2/I-branching beta-1,6-N-acetylglucosaminyltransferase family protein                                             | -1.162                  | 1.10E-06         |
| At1g03580       | pseudogene, meprin and TRAF homology (MATH) domain protein -related, weak similarity to ubiquitin-speci                | -2.136                  | 1.42E-07         |
| At1g03620       | ELMO/CED-12 family protein                                                                                             | -1.473                  | 1.17E-08         |
| At1g03750       | CHR9 (CHROMATIN REMODELING 9)                                                                                          | 1.29                    | 3.64E-08         |
| At1g03820       | unknown protein                                                                                                        | -1.561                  | 6.85E-06         |
| At1g03860       | ATPHB2 (prohibitin 2); prohibitin 2                                                                                    | 1.008                   | 7.02E-05         |
| At1g03870       | FLA9 (FASCICLIN-like arabinogalactan 9); fasciclin-like arabinogalactan-protein 9 (Fla9)                               | -1.359                  | 7.80E-06         |
| At1g03905       | P-loop containing nucleoside triphosphate hydrolases superfamily protein                                               | 2.938                   | 7.88E-11         |
| At1g03970       | GBF4 (G-box binding factor 4); encodes a basic leucine zipper G-box binding factor that can bind to G-box m            | 1.474                   | 6.26E-09         |
| At1g03980       | ATPCS2 (phytochelatin synthase 2); Encodes a protein with phytochelatin synthase activity which binds Cd <sup>2+</sup> | 1.198                   | 2.32E-05         |
| At1g03982       | PAK-box/P21-Rho-binding family protein                                                                                 | 3.008                   | 2.16E-11         |
| At1g04010       | PSAT1 (phospholipid sterol acyl transferase 1)                                                                         | 1.774                   | 9.58E-09         |
| At1g04050       | SDG13 (SET DOMAIN PROTEIN 13); Encodes SUVRI, one of the four closely related Arabidopsis SUVRI p                      | 2.72                    | 5.35E-10         |
| At1g04090       | Plant protein of unknown function (DUF946)                                                                             | 1.755                   | 7.21E-07         |
| At1g04130       | Tetratricopeptide repeat (TPR)-like superfamily protein                                                                | 2.921                   | 8.43E-10         |
| At1g04160       | ATXIB (ARABIDOPSIS THALIANA MYOSIN XI B); Encodes a member of the type XI myosin protein fami                          | 1.42                    | 2.99E-06         |
| At1g04240       | IAA3 (indole-3-acetic acid inducible 3); SHY2/IAA3 regulates multiple auxin responses in roots. It is induced          | -1.844                  | 6.75E-07         |
| At1g04400       | CRY2 (cryptochrome 2); Blue light receptor mediating blue-light regulated cotyledon expansion and flowering            | -1.045                  | 9.42E-08         |
| At1g04570       | Major facilitator superfamily protein                                                                                  | 5.027                   | 1.75E-11         |
| At1g04600       | XIA (myosin XI A); member of Myosin-like proteins                                                                      | 1.126                   | 4.79E-05         |

|           |                                                                                                              |        |          |
|-----------|--------------------------------------------------------------------------------------------------------------|--------|----------|
| At1g04770 | Tetratricopeptide repeat (TPR)-like superfamily protein                                                      | 2.243  | 9.61E-10 |
| At1g04800 | glycine-rich protein                                                                                         | -1.138 | 0.02203  |
| At1g04960 | Protein of unknown function (DUF1664)                                                                        | 1.846  | 1.68E-08 |
| At1g05170 | Galactosyltransferase family protein                                                                         | 2.787  | 1.03E-10 |
| At1g05200 | ATGLR3.4 (glutamate receptor 3.4); member of Putative ligand-gated ion channel subunit family                | -1.204 | 1.29E-07 |
| At1g05300 | ZIP5 (zinc transporter 5 precursor); member of Fe(II) transporter isolog family                              | -1.361 | 3.77E-06 |
| At1g05320 | FUNCTIONS IN: molecular_function unknown; INVOLVED IN: biological_process unknown; LOCATED IN                | -1.228 | 1.05E-07 |
| At1g05340 | unknown protein                                                                                              | 1.783  | 6.07E-05 |
| At1g05420 | ATOPF12 (ARABIDOPSIS THALIANA OVATE FAMILY PROTEIN 12)                                                       | -1.127 | 1.25E-05 |
| At1g05530 | UGT2 (UDP-GLUCOSYL TRANSFERASE 2); Encodes a protein with glucosyltransferase activity with high :           | 1.35   | 2.14E-05 |
| At1g05560 | UGT1 (UDP-GLUCOSE TRANSFERASE 1); A UDP-glucose transferase localized in the phragmoplast. It ha             | 1.913  | 7.26E-08 |
| At1g05575 | unknown protein                                                                                              | 1.113  | 1.63E-05 |
| At1g05590 | ATHEX3 (BETA-HEXOSAMINIDASE 3); Encodes a protein with &#946;-hexosaminidase activity (the enzy:             | -1.009 | 4.35E-07 |
| At1g05610 | APS2 (ADP-glucose pyrophosphorylase small subunit 2); Encodes the small subunit of ADP-glucose pyrophos      | -1.063 | 2.42E-05 |
| At1g05680 | UGT74E2 (Uridine diphosphate glycosyltransferase 74E2); Encodes a UDP-glucosyltransferase, UGT74E2, tl       | 4.204  | 1.26E-07 |
| At1g05700 | Leucine-rich repeat transmembrane protein kinase protein                                                     | 4.186  | 1.39E-09 |
| At1g05805 | basic helix-loop-helix (bHLH) DNA-binding superfamily protein                                                | -1.434 | 4.78E-09 |
| At1g05894 | unknown protein                                                                                              | 1.227  | 2.37E-07 |
| At1g06030 | pfkB-like carbohydrate kinase family protein                                                                 | 3.766  | 1.15E-11 |
| At1g06080 | ADS1 (delta 9 desaturase 1); homologous to delta 9 acyl-lipid desaturases of cyanobacteria and acyl-CoA desa | -1.715 | 2.75E-06 |
| At1g06100 | Fatty acid desaturase family protein                                                                         | -1.477 | 0.00039  |
| At1g06430 | FTSH8 (FTSH protease 8); encodes a FtsH protease that is localized to the chloroplast                        | 1.303  | 3.54E-07 |
| At1g06460 | ACD31.2 (ALPHA-CRYSTALLIN DOMAIN 31.2); ACD32.1 encodes an alpha-crystallin domain containing                | -1.628 | 5.90E-08 |
| At1g06520 | GPAT1 (glycerol-3-phosphate acyltransferase 1); Encodes a membrane associated mitochondrial localized prot   | -1.225 | 4.74E-06 |
| At1g06570 | HPD (4-HYDROXYPHENYLPYRUVATE DIOXYGENASE); Mutation of the PDS1 locus disrupts the activi                    | 1.342  | 4.41E-07 |
| At1g06800 | PLA-I{gamma}1 (phospholipase A I gamma 1); Encodes a lipase that hydrolyzes phosphatidylcholine, glycolip    | 2.115  | 4.38E-08 |
| At1g06870 | Peptidase S24/S26A/S26B/S26C family protein                                                                  | 1.073  | 3.90E-07 |
| At1g06980 | unknown protein                                                                                              | -1.508 | 1.12E-06 |
| At1g07000 | ATEXO70B2 (exocyst subunit exo70 family protein B2); A member of EXO70 gene family, putative exocyst :       | 2.686  | 6.41E-08 |
| At1g07010 | Calcineurin-like metallo-phosphoesterase superfamily protein                                                 | 2.08   | 3.89E-09 |
| At1g07050 | CCT motif family protein                                                                                     | -3.555 | 4.38E-09 |
| At1g07160 | Protein phosphatase 2C family protein                                                                        | 4.979  | 3.46E-10 |
| At1g07180 | ATNDI1 (ARABIDOPSIS THALIANA INTERNAL NON-PHOSPHORYLATING NAD ( P ) H DEHYDROC                               | 3.294  | 5.94E-10 |
| At1g07190 | BEST Arabidopsis thaliana protein match is: lon protease 1 (TAIR:AT5G26860.1)                                | 1.23   | 1.35E-08 |
| At1g07280 | Tetratricopeptide repeat (TPR)-like superfamily protein                                                      | -1.013 | 1.80E-05 |
| At1g07300 | josephin protein-related                                                                                     | 1.487  | 7.43E-09 |
| At1g07330 | unknown protein                                                                                              | 6.509  | 6.14E-13 |
| At1g07340 | ATSTP2 (sugar transporter 2)                                                                                 | 3.017  | 4.24E-11 |
| At1g07350 | RNA-binding (RRM/RBD/RNP motifs) family protein                                                              | 4.221  | 2.20E-12 |
| At1g07400 | HSP20-like chaperones superfamily protein                                                                    | 8.628  | 8.24E-12 |
| At1g07410 | ATRAB-A2B (ARABIDOPSIS RAB GTPASE HOMOLOG A2B)                                                               | 3.743  | 7.45E-12 |
| At1g07420 | ATSMO2 (STEROL 4-ALPHA-METHYL-OXIDASE 2); Arabidopsis thaliana sterol 4-alpha-methyl-oxidase r               | 1.445  | 5.33E-07 |
| At1g07450 | NAD(P)-binding Rossmann-fold superfamily protein                                                             | 1.137  | 3.06E-06 |
| At1g07470 | Transcription factor IIA, alpha/beta subunit                                                                 | 1.161  | 6.83E-09 |
| At1g07480 | Transcription factor IIA, alpha/beta subunit                                                                 | 1.572  | 6.99E-08 |
| At1g07500 | unknown protein                                                                                              | 7.503  | 3.99E-13 |
| At1g07510 | ftsh10 (FTSH protease 10); encodes an FtsH protease that is localized to the mitochondrion                   | 1.089  | 1.91E-07 |
| At1g07530 | ATGRAS2 (ARABIDOPSIS THALIANA GRAS (GAI, RGA, SCR) 2); Encodes a member of the GRAS fami                     | 1.004  | 5.71E-06 |
| At1g07640 | OBP2 (Dof-type zinc finger DNA-binding family protein); A member of the DOF transcription factors. Promin    | -1.049 | 1.50E-05 |
| At1g07700 | Thioredoxin superfamily protein                                                                              | 1.036  | 9.79E-08 |
| At1g07720 | KCS3 (3-ketoacyl-CoA synthase 3); Encodes KCS3, a member of the 3-ketoacyl-CoA synthase family involve       | -1.329 | 5.51E-07 |
| At1g07860 | BEST Arabidopsis thaliana protein match is: Protein kinase superfamily protein (TAIR:AT1G07870.2)            | 2.208  | 2.00E-10 |
| At1g07870 | Protein kinase superfamily protein                                                                           | 1.08   | 4.27E-05 |
| At1g07900 | LBD1 (LOB domain-containing protein 1)                                                                       | 1.565  | 0.00014  |
| At1g07985 | Expressed protein                                                                                            | 1.477  | 2.05E-05 |
| At1g08090 | ATNRT2.1 (NITRATE TRANSPORTER 2.1); High-affinity nitrate transporter. Up-regulated by nitrate. Funct        | -1.73  | 0.00014  |
| At1g08105 | hAT-like transposase family (hobo/Ac/Tam3), has a 1.0e-298 P-value blast match to GB:AAD24567 transposa      | 3.36   | 4.59E-11 |
| At1g08165 | unknown protein                                                                                              | -1.933 | 5.12E-05 |
| At1g08300 | NVL (NO VEIN-LIKE)                                                                                           | 1.371  | 1.83E-05 |
| At1g08310 | alpha/beta-Hydrolases superfamily protein                                                                    | -1.678 | 0.00137  |
| At1g08500 | ENODL18 (early nodulin-like protein 18)                                                                      | -1.079 | 8.02E-07 |
| At1g08570 | ACHT4 (atypical CYS HIS rich thioredoxin 4); Encodes a member of the thioredoxin family protein. Located     | 1.239  | 4.34E-08 |
| At1g08810 | AtMYB60 (myb domain protein 60); putative transcription factor of the R2R3-MYB gene family. Transcript ir    | -1.589 | 7.20E-06 |
| At1g08860 | BON3 (BONZAI 3); Encodes a copine-like protein, which is a member of a newly identified class of calcium-c   | 1.212  | 0.00084  |
| At1g08930 | ERD6 (EARLY RESPONSE TO DEHYDRATION 6); encodes a putative sucrose transporter whose gene expr               | 2.046  | 1.95E-09 |
| At1g08940 | Phosphoglycerate mutase family protein                                                                       | 2.24   | 1.55E-09 |
| At1g09070 | (AT)SRC2 (SOYBEAN GENE REGULATED BY COLD-2); SRC2 specifically binds the peptide PIEPPPHH,                   | 1.978  | 3.30E-08 |



|           |                                                                                                                 |        |          |
|-----------|-----------------------------------------------------------------------------------------------------------------|--------|----------|
| At1g09080 | BIP3 (Heat shock protein 70 (Hsp 70) family protein)                                                            | 2.158  | 0.005    |
| At1g09140 | ATSRP30 (SERINE-ARGININE PROTEIN 30); Encodes a serine-arginine rich RNA binding protein involved               | 3.214  | 1.81E-10 |
| At1g09157 | Protein of unknown function (DUF679)                                                                            | 3.859  | 2.47E-11 |
| At1g09240 | ATNAS3 (ARABIDOPSIS THALIANA NICOTIANAMINE SYNTHASE 3); Encodes a nicotianamine syntha                          | -2.98  | 1.96E-05 |
| At1g09250 | basic helix-loop-helix (bHLH) DNA-binding superfamily protein                                                   | -1.023 | 0.0002   |
| At1g09340 | CRB (chloroplast RNA binding); Encodes CHLOROPLAST RNA BINDING (CRB), a putative RNA-binding                    | 1.403  | 2.15E-06 |
| At1g09350 | AtGolS3 (galactinol synthase 3)                                                                                 | -1.743 | 2.84E-06 |
| At1g09500 | NAD(P)-binding Rossmann-fold superfamily protein; similar to Eucalyptus gunnii alcohol dehydrogenase of u       | 1.5    | 7.16E-05 |
| At1g09740 | Adenine nucleotide alpha hydrolases-like superfamily protein                                                    | 1.605  | 4.14E-08 |
| At1g09750 | Eukaryotic aspartyl protease family protein                                                                     | -1.255 | 2.13E-06 |
| At1g09780 | Phosphoglycerate mutase, 2,3-bisphosphoglycerate-independent                                                    | -1.205 | 1.19E-06 |
| At1g09932 | Phosphoglycerate mutase family protein                                                                          | 1.096  | 0.0097   |
| At1g09940 | HEMA2 (Glutamyl-tRNA reductase family protein); Encodes glutamyl-tRNA reductase. Involved in heme bio;          | 2.691  | 2.03E-10 |
| At1g09970 | RLK7 (receptor-like kinase 7); RLK7 belongs to a leucine-rich repeat class of receptor-likekinase (LRR-RLKs)    | 1.036  | 2.10E-06 |
| At1g10040 | alpha/beta-Hydrolases superfamily protein                                                                       | 5.119  | 6.56E-13 |
| At1g10050 | glycosyl hydrolase family 10 protein / carbohydrate-binding domain-containing protein; Encodes a putative gly   | 3.257  | 3.75E-11 |
| At1g10060 | ATBCAT-1 (branched-chain amino acid transaminase 1); encodes a mitochondrial branched-chain amino acid          | -1.214 | 0.0003   |
| At1g10155 | ATPP2-A10 (phloem protein 2-A10)                                                                                | 1.971  | 2.64E-08 |
| At1g10220 | BEST Arabidopsis thaliana protein match is: ZCF37 (TAIR:AT1G59590.1)                                            | 2.407  | 4.68E-08 |
| At1g10230 | ASK18 (SKP1-like 18)                                                                                            | 2.071  | 1.26E-09 |
| At1g10300 | Nucleolar GTP-binding protein                                                                                   | 1.685  | 1.30E-05 |
| At1g10320 | Zinc finger C-x8-C-x5-C-x3-H type family protein                                                                | 1.163  | 8.69E-07 |
| At1g10370 | ATGSTU17 (GLUTATHIONE S-TRANSFERASE TAU 17)                                                                     | 2.098  | 2.77E-07 |
| At1g10550 | XET (XYLOGLUCAN:XYLOGLUCOSYL TRANSFERASE 33); Encodes a membrane-localized protein that                         | -1.619 | 3.73E-05 |
| At1g10585 | basic helix-loop-helix (bHLH) DNA-binding superfamily protein                                                   | 1.508  | 0.0005   |
| At1g10620 | Protein kinase superfamily protein                                                                              | 1.014  | 4.92E-06 |
| At1g10760 | SEX1 (STARCH EXCESS 1); Encodes an &#945;-glucan, water dikinase required for starch degradation. Invc          | -1.89  | 1.11E-09 |
| At1g10770 | Plant invertase/pectin methylesterase inhibitor superfamily protein; Encodes a putative pectin methylesterase/i | -1.962 | 2.95E-08 |
| At1g10960 | ATFD1 (ferredoxin 1)                                                                                            | 1.308  | 3.22E-08 |
| At1g11050 | Protein kinase superfamily protein                                                                              | 1.196  | 6.12E-06 |
| At1g11100 | SNF2 domain-containing protein / helicase domain-containing protein / zinc finger protein-related               | 4.376  | 2.50E-12 |
| At1g11160 | Transducin/WD40 repeat-like superfamily protein                                                                 | 1.219  | 2.55E-06 |
| At1g11210 | Protein of unknown function (DUF761)                                                                            | -2.067 | 1.22E-05 |
| At1g11260 | ATSTP1 (SUGAR TRANSPORTER 1); Encodes a H <sup>+</sup> /hexose cotransporter.                                   | -2.009 | 1.06E-05 |
| At1g11530 | ATCXXS1 (C-terminal cysteine residue is changed to a serine 1); Encodes a monocysteinic thioredoxin, thio       | -1.375 | 3.46E-06 |
| At1g11540 | Sulfite exporter TauE/SafE family protein                                                                       | -2.304 | 5.09E-11 |
| At1g11545 | XTH8 (xyloglucan endotransglucosylase/hydrolase 8)                                                              | -1.35  | 1.22E-05 |
| At1g11660 | heat shock protein 70 (Hsp 70) family protein                                                                   | 2.607  | 7.99E-11 |
| At1g11700 | Protein of unknown function, DUF584                                                                             | -1.434 | 8.22E-08 |
| At1g11740 | ankyrin repeat family protein                                                                                   | -2.11  | 8.05E-08 |
| At1g11803 | pseudogene, auxin responsive protein, blastp match of 74% identity and 1.2e-15 P-value to GP 3043536 dbj B      | -1.937 | 2.97E-07 |
| At1g11850 | unknown protein                                                                                                 | -1.589 | 2.25E-07 |
| At1g11880 | transferases, transferring hexosyl groups                                                                       | 1.608  | 1.58E-09 |
| At1g12010 | 2-oxoglutarate (2OG) and Fe(II)-dependent oxygenase superfamily protein; Encodes a protein that appears to f    | -1.464 | 8.22E-05 |
| At1g12030 | Protein of unknown function (DUF506)                                                                            | 5.383  | 3.35E-08 |
| At1g12060 | ATBAG5 (BCL-2-associated athanogene 5); A member of Arabidopsis BAG (Bcl-2-associated athanogene) pr            | 3.004  | 9.80E-11 |
| At1g12064 | unknown protein                                                                                                 | 3.776  | 4.89E-09 |
| At1g12080 | Vacuolar calcium-binding protein-related                                                                        | -1.784 | 3.69E-05 |
| At1g12090 | ELP (extensin-like protein); extensin-like protein (ELP)                                                        | -1.643 | 4.72E-07 |
| At1g12110 | ATNRT1 (ARABIDOPSIS THALIANA NITRATE TRANSPORTER 1); Encodes NRT1.1 (CHL1), a dual-affi                         | -1.118 | 0.0005   |
| At1g12120 | Plant protein of unknown function (DUF863)                                                                      | -1.138 | 5.24E-08 |
| At1g12150 | Plant protein of unknown function (DUF827)                                                                      | -2.379 | 2.33E-05 |
| At1g12360 | KEU (keule); encodes a Sec1 protein and expressed throughout the plant. physically interacts with Syntaxin1 a   | 1.699  | 5.90E-09 |
| At1g12480 | CDI3 (CARBON DIOXIDE INSENSITIVE 3); Encodes a membrane protein with 10 predicted transmembran                  | -1.31  | 7.91E-06 |
| At1g12740 | CYP87A2 (cytochrome P450, family 87, subfamily A, polypeptide 2); encodes a protein with cytochrome P45         | 1.707  | 2.59E-08 |
| At1g12845 | unknown protein                                                                                                 | -1.165 | 1.28E-05 |
| At1g12940 | ATNRT2.5 (nitrate transporter2.5); member of High affinity nitrate transporter family                           | -1.328 | 0.00989  |
| At1g13080 | CYP71B2 (cytochrome P450, family 71, subfamily B, polypeptide 2); cytochrome P450 monooxygenase                 | 1.851  | 1.28E-08 |
| At1g13110 | CYP71B7 (cytochrome P450, family 71 subfamily B, polypeptide 7); member of CYP71B                               | -1.233 | 3.99E-06 |
| At1g13195 | RING/U-box superfamily protein                                                                                  | 2.509  | 2.23E-11 |
| At1g13245 | DVL4 (DEVIL 4)                                                                                                  | -1.474 | 6.61E-08 |
| At1g13250 | GATL3 (galacturonosyltransferase-like 3); Encodes a protein with putative galacturonosyltransferase activity.   | -1.21  | 4.02E-07 |
| At1g13300 | HRS1 (HYPERSENSITIVITY TO LOW PI-ELICITED PRIMARY ROOT SHORTENING 1); Overexpressior                            | -2.904 | 1.84E-05 |
| At1g13310 | Endosomal targeting BRO1-like domain-containing protein                                                         | 3.017  | 9.17E-09 |
| At1g13340 | Regulator of Vps4 activity in the MVB pathway protein                                                           | 3.254  | 3.62E-05 |
| At1g13430 | ATST4C (ARABIDOPSIS THALIANA SULFOTRANSFERASE 4C); Encodes a sulfotransferase. Unlike the 1                     | -1.354 | 0.00014  |
| At1g13448 | other RNA; Potential natural antisense gene, locus overlaps with AT1G13450                                      | -1.548 | 4.53E-08 |

|           |                                                                                                             |        |          |
|-----------|-------------------------------------------------------------------------------------------------------------|--------|----------|
| At1g13470 | Protein of unknown function (DUF1262)                                                                       | -1.127 | 0.0217   |
| At1g13620 | RGF2 (root meristem growth factor 2); Encodes a root meristem growth factor (RGF). Belongs to a family of 1 | 1.505  | 1.01E-07 |
| At1g13670 | unknown protein                                                                                             | -1.281 | 6.21E-05 |
| At1g13690 | ATE1 (ATPase E1); AtE1 - stimulates the ATPase activity of DnaK/DnaJ                                        | 1.135  | 1.54E-06 |
| At1g13700 | PGL1 (6-phosphogluconolactonase 1)                                                                          | -1.762 | 5.33E-07 |
| At1g13750 | Purple acid phosphatases superfamily protein                                                                | -1.55  | 9.49E-05 |
| At1g13890 | SNAP30 (soluble N-ethylmaleimide-sensitive factor adaptor protein 30); Encodes a member of a gene family h  | 1.056  | 0.01188  |
| At1g13990 | unknown protein                                                                                             | 1.645  | 3.15E-06 |
| At1g14048 | GCK domain-containing protein                                                                               | 1.308  | 9.19E-09 |
| At1g14070 | FUT7 (fucosyltransferase 7); member of Xyloglucan fucosyltransferase family                                 | 1.014  | 6.82E-05 |
| At1g14190 | Glucose-methanol-choline (GMC) oxidoreductase family protein                                                | -1.465 | 1.77E-06 |
| At1g14200 | RING/U-box superfamily protein                                                                              | 4.251  | 3.68E-11 |
| At1g14205 | Ribosomal L18p/L5e family protein                                                                           | 1.304  | 0.0014   |
| At1g14210 | Ribonuclease T2 family protein                                                                              | -1.29  | 1.36E-06 |
| At1g14260 | RING/FYVE/PHD zinc finger superfamily protein                                                               | 1.188  | 4.40E-05 |
| At1g14280 | PKS2 (phytochrome kinase substrate 2); Encodes phytochrome kinase substrate 2. PKS proteins are critical fo | -1.256 | 3.42E-05 |
| At1g14360 | UTR3 (UDP-galactose transporter 3)                                                                          | 2.013  | 5.04E-10 |
| At1g14370 | APK2A (protein kinase 2A); Encodes protein kinase APK2a.                                                    | 2.08   | 3.68E-08 |
| At1g14420 | AT59 (Pectate lyase family protein)                                                                         | 1.554  | 7.78E-09 |
| At1g14540 | Peroxidase superfamily protein                                                                              | 4.387  | 4.60E-09 |
| At1g14640 | SWAP (Suppressor-of-White-APricot)/surp domain-containing protein                                           | 1.341  | 4.74E-07 |
| At1g14700 | PAP3 (purple acid phosphatase 3)                                                                            | -1.411 | 1.02E-07 |
| At1g14780 | MAC/Perforin domain-containing protein                                                                      | 1.224  | 8.20E-06 |
| At1g14870 | PCR2 (PLANT CADMIUM RESISTANCE 2)                                                                           | 2.142  | 0.0003   |
| At1g14920 | GAI (GIBBERELIC ACID INSENSITIVE); Similar to a putative transcription factor and transcriptional coac      | -1.338 | 8.43E-09 |
| At1g14970 | O-fucosyltransferase family protein                                                                         | 1.474  | 7.80E-09 |
| At1g15010 | unknown protein                                                                                             | -1.184 | 0.01402  |
| At1g15040 | Class I glutamine amidotransferase-like superfamily protein                                                 | -1.895 | 0.0011   |
| At1g15110 | phosphatidyl serine synthase family protein                                                                 | 1.502  | 8.66E-08 |
| At1g15170 | MATE efflux family protein                                                                                  | 1.521  | 3.75E-08 |
| At1g15190 | Fasciclin-like arabinogalactan family protein                                                               | 2.205  | 8.43E-09 |
| At1g15260 | unknown protein                                                                                             | -1.378 | 1.25E-07 |
| At1g15300 | hAT-like transposase family (hobo/Ac/Tam3), has a 5.1e-59 P-value blast match to GB:CAA29005 ORFa of M      | 1.418  | 1.29E-06 |
| At1g15380 | Lactoylglutathione lyase / glyoxalase I family protein                                                      | -1.436 | 0.01155  |
| At1g15415 | FUNCTIONS IN: molecular_function unknown; INVOLVED IN: biological_process unknown; LOCATED IN               | 3.39   | 1.68E-09 |
| At1g15430 | Protein of unknown function (DUF1644)                                                                       | 3.318  | 3.18E-11 |
| At1g15520 | ABCG40 (ATP-BINDING CASSETTE FAMILY G40); ABC transporter family involved in ABA transport an               | 3.846  | 0.00115  |
| At1g15530 | Concanavalin A-like lectin protein kinase family protein                                                    | 1.554  | 1.35E-08 |
| At1g15540 | 2-oxoglutarate (2OG) and Fe(II)-dependent oxygenase superfamily protein                                     | 3.913  | 3.59E-09 |
| At1g15580 | AUX2-27 (AUXIN-INDUCIBLE 2-27); auxin induced protein                                                       | -1.478 | 1.50E-07 |
| At1g16022 | unknown protein                                                                                             | 1.853  | 1.57E-08 |
| At1g16030 | Hsp70b (heat shock protein 70B)                                                                             | 7.272  | 4.43E-13 |
| At1g16040 | FUNCTIONS IN: molecular_function unknown; INVOLVED IN: GPI anchor biosynthetic process; LOCATED IN          | 2.841  | 8.36E-11 |
| At1g16060 | ADAP (ARIA-interacting double AP2 domain protein); Encodes ADAP, an AP2-domain protein that interacts       | 1.578  | 8.73E-10 |
| At1g16090 | WAKL7 (wall associated kinase-like 7); WAK-like kinase                                                      | 2.516  | 1.34E-07 |
| At1g16130 | WAKL2 (wall associated kinase-like 2); wall-associated kinase like                                          | 1.464  | 1.90E-05 |
| At1g16290 | FUNCTIONS IN: molecular_function unknown; INVOLVED IN: biological_process unknown; LOCATED IN               | 1.467  | 1.02E-06 |
| At1g16370 | ATOCT6 (ARABIDOPSIS THALIANA ORGANIC CATION/CARNITINE TRANSPORTER 6)                                        | -1.004 | 0.00012  |
| At1g16400 | CYP79F2 (cytochrome P450, family 79, subfamily F, polypeptide 2); Encodes cytochrome P450 CYP79F2.          | -2.722 | 3.17E-09 |
| At1g16410 | BUS1 (BUSHY 1); member of CYP79F                                                                            | -4.39  | 3.00E-09 |
| At1g16420 | ATMC8 (ARABIDOPSIS THALIANA METACASPASE 8); Encodes a metacaspase (cysteine-type endopepti                  | 4.798  | 2.01E-07 |
| At1g16540 | ABA3 (ABA DEFICIENT 3); Encodes molybdenum cofactor sulfurase. Involved in Moco biosynthesis. Involv        | 1.277  | 5.50E-09 |
| At1g16630 | unknown protein                                                                                             | 1.687  | 7.66E-07 |
| At1g16640 | AP2/B3-like transcriptional factor family protein                                                           | 1.767  | 1.73E-08 |
| At1g16670 | Protein kinase superfamily protein                                                                          | 1.686  | 1.56E-08 |
| At1g16730 | UP6 (unknown protein 6)                                                                                     | 2.16   | 2.90E-07 |
| At1g16750 | Protein of unknown function, DUF547                                                                         | -1.457 | 8.56E-09 |
| At1g16960 | Ubiquitin domain-containing protein                                                                         | -1.486 | 3.18E-07 |
| At1g16980 | ATTPS2 (trehalose-phosphatase/synthase 2); Encodes an enzyme putatively involved in trehalose biosynthesis  | 1.264  | 4.59E-06 |
| At1g17050 | SPS2 (solaneyl diphosphate synthase 2); Encodes a protein with solaneyl diphosphate synthase activity.      | 1.576  | 1.12E-07 |
| At1g17170 | ATGSTU24 (glutathione S-transferase TAU 24); Encodes glutathione transferase belonging to the tau class of  | 3.265  | 1.38E-06 |
| At1g17180 | ATGSTU25 (glutathione S-transferase TAU 25); Encodes glutathione transferase belonging to the tau class of  | 2.976  | 4.14E-05 |
| At1g17240 | AtRLP2 (receptor like protein 2); Encodes a CLAVATA2 (CLV2)-related gene. Complements the clv2 mutant       | 1      | 0.00165  |
| At1g17330 | Metal-dependent phosphohydrolase                                                                            | 1.398  | 4.32E-07 |
| At1g17430 | alpha/beta-Hydrolases superfamily protein                                                                   | -1.137 | 3.76E-06 |
| At1g17490 | unknown protein                                                                                             | -1.039 | 4.00E-08 |
| At1g17610 | Disease resistance protein (TIR-NBS class)                                                                  | 1.508  | 5.64E-07 |

|           |                                                                                                                  |        |          |
|-----------|------------------------------------------------------------------------------------------------------------------|--------|----------|
| At1g17665 | unknown protein                                                                                                  | -1.436 | 1.70E-05 |
| At1g17700 | PRA1.F1 (prenylated RAB acceptor 1.F1)                                                                           | -1.457 | 5.48E-07 |
| At1g17710 | Pyridoxal phosphate phosphatase-related protein                                                                  | -2.36  | 0.00129  |
| At1g17870 | ATEGY3 (ETHYLENE-DEPENDENT GRAVITROPISM-DEFICIENT AND YELLOW-GREEN-LIKE 3); S2                                   | 5.794  | 3.39E-12 |
| At1g18000 | Major facilitator superfamily protein                                                                            | -1.18  | 5.10E-07 |
| At1g18200 | AtRABA6b (RAB GTPase homolog A6B)                                                                                | 2.392  | 1.18E-09 |
| At1g18300 | atnudt4 (nudix hydrolase homolog 4)                                                                              | 1.386  | 1.46E-07 |
| At1g18330 | EPR1 (EARLY-PHYTOCHROME-RESPONSIVE1); EARLY-PHYTOCHROME-RESPONSIVE1                                              | 2.213  | 5.31E-10 |
| At1g18350 | ATMKK7 (MAP kinase kinase 7); MAP kinase kinase7. Member of plant mitogen-activated protein kinase ki            | -1.666 | 1.56E-06 |
| At1g18380 | NA                                                                                                               | 2.178  | 1.41E-09 |
| At1g18382 | other RNA; Potential natural antisense gene, locus overlaps with AT1G18380                                       | 1.201  | 9.31E-09 |
| At1g18390 | Protein kinase superfamily protein                                                                               | 1.635  | 2.13E-08 |
| At1g18400 | BEE1 (BR enhanced expression 1)                                                                                  | -1.339 | 2.85E-08 |
| At1g18420 | Aluminium activated malate transporter family protein                                                            | 1.335  | 2.71E-06 |
| At1g18510 | TET16 (tetraspanin 16); Member of TETRASPANIN family                                                             | 2.308  | 3.20E-07 |
| At1g18590 | ATSOT17 (SULFOTRANSFERASE 17); encodes a desulfoglucosinolate sulfotransferase, involved in the fina             | -2.966 | 1.10E-08 |
| At1g18620 | unknown protein                                                                                                  | -1.163 | 3.86E-06 |
| At1g18710 | AtMYB47 (myb domain protein 47); Member of the R2R3 factor gene family.                                          | -1.622 | 4.84E-05 |
| At1g18750 | AGL65 (AGAMOUS-like 65); Encodes a member of the MIKC (MADS box, Keratin binding domain, and C t                 | 1.157  | 4.77E-06 |
| At1g18870 | ATICS2 (ARABIDOPSIS ISOCHORISMATE SYNTHASE 2); Encodes a protein with isochorismate synthase                     | 2.366  | 1.39E-07 |
| At1g18890 | ATCDPK1 (calcium-dependent protein kinase 1); encodes a calcium-dependent protein kinase whose gene exp          | 1.87   | 7.84E-09 |
| At1g18960 | myb-like HTH transcriptional regulator family protein                                                            | 2.154  | 1.23E-06 |
| At1g19020 | unknown protein                                                                                                  | 4.947  | 5.81E-10 |
| At1g19025 | DNA repair metallo-beta-lactamase family protein                                                                 | 2.008  | 7.30E-08 |
| At1g19180 | JAZ1 (jasmonate-zim-domain protein 1); JAZ1 is a nuclear-localized protein involved in jasmonate signaling.      | 1.187  | 0.00077  |
| At1g19190 | alpha/beta-Hydrolases superfamily protein                                                                        | -1.004 | 4.12E-06 |
| At1g19200 | Protein of unknown function (DUF581)                                                                             | -2.845 | 3.79E-06 |
| At1g19230 | Riboflavin synthase-like superfamily protein                                                                     | 1.047  | 0.00025  |
| At1g19340 | Methyltransferase MT-A70 family protein                                                                          | -1.059 | 3.75E-07 |
| At1g19370 | unknown protein                                                                                                  | -1.45  | 5.77E-09 |
| At1g19540 | NmrA-like negative transcriptional regulator family protein                                                      | 2.14   | 1.98E-09 |
| At1g19610 | LCR78 (LOW-MOLECULAR-WEIGHT CYSTEINE-RICH 78); Predicted to encode a PR (pathogenesis-relate                     | 1.29   | 0.00465  |
| At1g19620 | unknown protein                                                                                                  | -1.53  | 9.63E-06 |
| At1g19640 | JMT (jasmonic acid carboxyl methyltransferase); Encodes a S-adenosyl-L-methionine;jasmonic acid carboxyl         | 1.209  | 0.0002   |
| At1g19740 | ATP-dependent protease La (LON) domain protein                                                                   | -1.039 | 2.90E-05 |
| At1g19920 | ASA1 (ATP SULFURYLASE ARABIDOPSIS 1); encodes a chloroplast form of ATP sulfurylase                              | -1.042 | 4.14E-07 |
| At1g19980 | cytomatrix protein-related                                                                                       | 1.226  | 2.09E-07 |
| At1g20010 | TUB5 (tubulin beta-5 chain); beta tubulin                                                                        | -1.074 | 6.49E-05 |
| At1g20070 | unknown protein                                                                                                  | -2.121 | 4.49E-08 |
| At1g20120 | GDSL-like Lipase/Acylhydrolase superfamily protein                                                               | 3.191  | 3.87E-10 |
| At1g20190 | ATEXPA11 (expansin 11); member of Alpha-Expansin Gene Family. Naming convention from the Expansin \              | -2.978 | 1.04E-09 |
| At1g20310 | unknown protein                                                                                                  | 4.223  | 1.84E-09 |
| At1g20320 | Haloacid dehalogenase-like hydrolase (HAD) superfamily protein                                                   | 1.085  | 0.00306  |
| At1g20350 | ATTIM17-1 (translocase inner membrane subunit 17-1); mitochondrial inner membrane translocase                    | 1.664  | 1.14E-06 |
| At1g20400 | Protein of unknown function (DUF1204)                                                                            | 1.014  | 0.00381  |
| At1g20460 | unknown protein                                                                                                  | 1.374  | 3.96E-09 |
| At1g20470 | SAUR-like auxin-responsive protein family                                                                        | 1.105  | 8.28E-05 |
| At1g20515 | other RNA; Potential natural antisense gene, locus overlaps with AT1G20520                                       | -1.046 | 2.75E-06 |
| At1g20620 | CAT3 (catalase 3); Catalase, catalyzes the breakdown of hydrogen peroxide (H2O2) into water and oxygen.          | -1.773 | 1.75E-06 |
| At1g20640 | Plant regulator RWP-RK family protein                                                                            | 2.717  | 1.97E-10 |
| At1g20696 | HMGB3 (high mobility group B3); Encodes a protein belonging to the subgroup of HMGB (high mobility gro           | -1.093 | 1.06E-06 |
| At1g20840 | TMT1 (tonoplast monosaccharide transporter1); The protein encoded by this gene is found in the tonoplast (va     | -1.281 | 1.51E-07 |
| At1g20925 | Auxin efflux carrier family protein                                                                              | 2.159  | 4.60E-06 |
| At1g21010 | unknown protein                                                                                                  | 2.345  | 4.66E-09 |
| At1g21110 | O-methyltransferase family protein                                                                               | 2.972  | 3.10E-07 |
| At1g21120 | O-methyltransferase family protein                                                                               | 2.385  | 4.76E-08 |
| At1g21210 | WAK4 (wall associated kinase 4); cell wall-associated ser/thr kinase involved in cell elongation and lateral roo | 1.293  | 1.08E-08 |
| At1g21410 | SKP2A (F-box/RNI-like superfamily protein); AtSKP2;1 is a homolog of human SKP2, the human F-box prote           | 1.97   | 1.09E-09 |
| At1g21440 | Phosphoenolpyruvate carboxylase family protein                                                                   | -1.131 | 4.45E-08 |
| At1g21450 | SCL1 (SCARECROW-like 1); Encodes a scarecrow-like protein (SCL1). Member of GRAS gene family.                    | 1.002  | 9.19E-08 |
| At1g21530 | AMP-dependent synthetase and ligase family protein                                                               | 2.003  | 0.00018  |
| At1g21540 | AMP-dependent synthetase and ligase family protein                                                               | -1.849 | 8.89E-06 |
| At1g21550 | Calcium-binding EF-hand family protein                                                                           | 7.181  | 4.62E-12 |
| At1g21600 | PTAC6 (plastid transcriptionally active 6); Present in transcriptionally active plastid chromosomes. Involved in | -1.037 | 1.22E-06 |
| At1g21830 | unknown protein                                                                                                  | -1.219 | 3.82E-08 |
| At1g21840 | UREF (urease accessory protein F); Encodes a urease accessory protein which is essential for the activation of   | -1.061 | 1.84E-06 |
| At1g21910 | Integrase-type DNA-binding superfamily protein; encodes a member of the DREB subfamily A-5 of ERF/AP2            | -2.026 | 1.56E-05 |

|           |                                                                                                            |        |          |
|-----------|------------------------------------------------------------------------------------------------------------|--------|----------|
| At1g21920 | Histone H3 K4-specific methyltransferase SET7/9 family protein                                             | -1.178 | 9.59E-08 |
| At1g21940 | unknown protein                                                                                            | 2.013  | 4.60E-09 |
| At1g22150 | SULTR1.3 (sulfate transporter 1.3); sulfate transporter Sultr1;3                                           | -1.024 | 0.01696  |
| At1g22190 | Integrase-type DNA-binding superfamily protein                                                             | 1.043  | 3.67E-06 |
| At1g22210 | Haloacid dehalogenase-like hydrolase (HAD) superfamily protein                                             | 2.906  | 6.42E-11 |
| At1g22280 | PAPP2C (phytochrome-associated protein phosphatase type 2C); Encodes a phytochrome-associated protein, F   | 1.311  | 2.53E-07 |
| At1g22310 | MBD8 (methyl-CPG-binding domain 8); Protein containing methyl-CpG-binding domain.Has sequence simila       | 1.273  | 1.09E-07 |
| At1g22330 | RNA-binding (RRM/RBD/RNP motifs) family protein                                                            | -1.494 | 1.00E-06 |
| At1g22340 | AtUGT85A7 (UDP-glucosyl transferase 85A7)                                                                  | -1.154 | 4.26E-06 |
| At1g22370 | AtUGT85A5 (UDP-glucosyl transferase 85A5)                                                                  | -1.486 | 6.13E-07 |
| At1g22470 | unknown protein                                                                                            | 1.885  | 2.45E-05 |
| At1g22500 | RING/U-box superfamily protein                                                                             | -1.937 | 1.86E-05 |
| At1g22510 | RING/U-box protein with domain of unknown function (DUF 1232)                                              | 1.5    | 5.85E-08 |
| At1g22530 | PATL2 (PATELLIN 2)                                                                                         | -1.014 | 0.0009   |
| At1g22550 | Major facilitator superfamily protein                                                                      | -1.03  | 5.01E-05 |
| At1g22570 | Major facilitator superfamily protein                                                                      | -1.967 | 3.84E-09 |
| At1g22640 | ATMYB3 (ARABIDOPSIS THALIANA MYB DOMAIN PROTEIN 3); MYB-type transcription factor (MYE                     | -1.294 | 1.38E-07 |
| At1g22710 | ATSUC2 (ARABIDOPSIS THALIANA SUCROSE-PROTON SYMPORTER 2); Encodes for a high-affinity 1                    | -1.973 | 2.00E-06 |
| At1g22740 | RABG3B (RAB GTPase homolog G3B); GTP-binding protein Rab7                                                  | -1.259 | 7.58E-05 |
| At1g22750 | unknown protein                                                                                            | 1.011  | 1.76E-06 |
| At1g22770 | GI (GIGANTEA); Together with CONSTANTS (CO) and FLOWERING LOCUS T (FT), GIGANTEA promo                     | -1.264 | 5.65E-07 |
| At1g22810 | Integrase-type DNA-binding superfamily protein; encodes a member of the DREB subfamily A-5 of ERF/AP2      | 6.374  | 7.25E-13 |
| At1g22950 | 2-oxoglutarate (2OG) and Fe(II)-dependent oxygenase superfamily protein                                    | 1.285  | 2.24E-07 |
| At1g22985 | Integrase-type DNA-binding superfamily protein; encodes a member of the ERF (ethylene response factor) sub | 2.256  | 9.40E-11 |
| At1g22990 | Heavy metal transport/detoxification superfamily protein                                                   | -1.835 | 0.00815  |
| At1g23050 | hydroxyproline-rich glycoprotein family protein                                                            | -1.831 | 7.46E-08 |
| At1g23060 | BEST Arabidopsis thaliana protein match is: TPX2 (targeting protein for Xklp2) protein family (TAIR:AT1G7  | -1.396 | 2.14E-07 |
| At1g23080 | ATPIN7 (ARABIDOPSIS PIN-FORMED 7); Encodes a novel component of auxin efflux that is located apical        | -1.85  | 3.35E-09 |
| At1g23110 | unknown protein                                                                                            | -2.621 | 0.00091  |
| At1g23120 | Polyketide cyclase/dehydrase and lipid transport superfamily protein                                       | -1.21  | 1.77E-05 |
| At1g23180 | ARM repeat superfamily protein                                                                             | 1.567  | 5.29E-09 |
| At1g23310 | AOAT1 (ALANINE-2-OXOGLUTARATE AMINOTRANSFERASE 1); Identified by cloning the gene that cc                  | 1.091  | 3.75E-05 |
| At1g23330 | alpha/beta-Hydrolases superfamily protein                                                                  | 2.102  | 3.10E-11 |
| At1g23390 | Kelch repeat-containing F-box family protein                                                               | -1.401 | 9.69E-06 |
| At1g23440 | Peptidase C15, pyroglutamyl peptidase I-like                                                               | 1.117  | 1.32E-05 |
| At1g23500 | GDSL-like Lipase/Acylhydrolase superfamily protein                                                         | 1.296  | 2.21E-06 |
| At1g23540 | AtPERK12 (proline-rich extensin like receptor kinase); Encodes a member of the PERK family of putative rec | 2.801  | 5.03E-11 |
| At1g23550 | similar to RCD one 2 (SRO2); FUNCTIONS IN: NAD+ ADP-ribosyltransferase activity; INVOLVED IN: biol         | 4.659  | 5.86E-12 |
| At1g23710 | Protein of unknown function (DUF1645)                                                                      | 2.844  | 1.18E-08 |
| At1g23730 | ATBCA3 (BETA CARBONIC ANHYDRASE 3)                                                                         | 1.948  | 6.46E-07 |
| At1g23740 | Oxidoreductase, zinc-binding dehydrogenase family protein                                                  | 1.5    | 7.28E-08 |
| At1g23830 | unknown protein                                                                                            | 1.741  | 8.25E-09 |
| At1g24090 | RNase H family protein                                                                                     | 1.134  | 5.49E-07 |
| At1g24100 | UGT74B1 (UDP-glucosyl transferase 74B1); Encodes a UDP-glucose:thiohydroximate S-glucosyltransferase, i    | -2.005 | 4.66E-09 |
| At1g24140 | Matrixin family protein                                                                                    | 2.948  | 6.16E-06 |
| At1g24145 | unknown protein                                                                                            | 1.543  | 0.0005   |
| At1g24148 | unknown protein                                                                                            | -1.208 | 0.0002   |
| At1g24150 | ATFH4 (FORMIN HOMOLOGUE 4); Encodes a group I formin. Localized to cell junctions. Polymerizes actin       | 2.338  | 7.46E-08 |
| At1g24260 | AGL9 (AGAMOUS-like 9); Member of the MADs box transcription factor family. SEP3 is redundant with SE       | -2.977 | 4.62E-06 |
| At1g24270 | unknown protein                                                                                            | -2.198 | 5.50E-05 |
| At1g24280 | G6PD3 (glucose-6-phosphate dehydrogenase 3); Encodes a plastidic glucose-6-phosphate dehydrogenase that i  | -2.001 | 1.40E-06 |
| At1g24400 | AATL2 (AMINO ACID TRANSPORTER-LIKE PROTEIN 2); High-affinity transporter for neutral and acidic            | -1.417 | 1.37E-07 |
| At1g24530 | Transducin/WD40 repeat-like superfamily protein                                                            | -1.228 | 1.63E-07 |
| At1g24570 | Protein of unknown function (DUF707)                                                                       | 1.965  | 4.95E-06 |
| At1g24577 | unknown protein                                                                                            | -2.309 | 4.29E-08 |
| At1g24625 | ZFP7 (zinc finger protein 7); Encodes a zinc finger protein containing only a single zinc finger.          | -1.18  | 1.62E-07 |
| At1g25230 | Calcineurin-like metallo-phosphoesterase superfamily protein                                               | -1.57  | 4.49E-08 |
| At1g25370 | Protein of unknown function (DUF1639)                                                                      | 1.512  | 2.98E-08 |
| At1g25400 | unknown protein                                                                                            | 1.155  | 0.0005   |
| At1g25440 | B-box type zinc finger protein with CCT domain                                                             | -1.901 | 2.66E-06 |
| At1g25450 | CER60 (ECERIFERUM 60); Encodes KCS5, a member of the 3-ketoacyl-CoA synthase family involved in the        | -1.258 | 5.56E-05 |
| At1g25560 | EDF1 (ETHYLENE RESPONSE DNA BINDING FACTOR 1); Encodes a member of the RAV transcription f                 | -1.506 | 2.55E-07 |
| At1g25682 | Family of unknown function (DUF572)                                                                        | 1.182  | 3.11E-08 |
| At1g26210 | ATSOFL1 (SOB FIVE-LIKE 1); AtSOFL1 acts redundantly with AtSOFL2 as positive regulator of cytokinin l      | -1.845 | 5.68E-08 |
| At1g26300 | BSD domain-containing protein                                                                              | 1.082  | 2.84E-07 |
| At1g26390 | FAD-binding Berberine family protein                                                                       | -1.612 | 0.00974  |
| At1g26400 | FAD-binding Berberine family protein                                                                       | -1.098 | 0.0016   |

|           |                                                                                                                 |        |          |
|-----------|-----------------------------------------------------------------------------------------------------------------|--------|----------|
| At1g26420 | FAD-binding Berberine family protein                                                                            | 1.477  | 3.39E-05 |
| At1g26600 | CLE9 (CLAVATA3/ESR-RELATED 9); Member of a large family of putative ligands homologous to the Clav              | -1.236 | 1.57E-07 |
| At1g26690 | emp24/gp25L/p24 family/GOLD family protein                                                                      | 1.328  | 1.45E-08 |
| At1g26762 | unknown protein                                                                                                 | -1.112 | 6.11E-06 |
| At1g26790 | Dof-type zinc finger DNA-binding family protein                                                                 | 1.009  | 0.0019   |
| At1g26800 | RING/U-box superfamily protein                                                                                  | 3.752  | 1.18E-10 |
| At1g26920 | unknown protein                                                                                                 | -1.612 | 3.27E-07 |
| At1g26945 | KDR (KIDARI); Encodes a basic helix-loop-helix (bHLH) protein involved in blue/far-red light signaling. Phy     | -1.508 | 5.08E-07 |
| At1g27020 | unknown protein                                                                                                 | -1.497 | 0.0005   |
| At1g27100 | Actin cross-linking protein                                                                                     | 1.526  | 2.46E-07 |
| At1g27170 | transmembrane receptors                                                                                         | 2.295  | 2.23E-10 |
| At1g27330 | Ribosome associated membrane protein RAMP4                                                                      | 1.881  | 7.25E-09 |
| At1g27350 | Ribosome associated membrane protein RAMP4                                                                      | 2.118  | 2.48E-10 |
| At1g27610 | unknown protein                                                                                                 | 1.03   | 5.06E-06 |
| At1g27660 | basic helix-loop-helix (bHLH) DNA-binding superfamily protein                                                   | -1.013 | 2.48E-06 |
| At1g27670 | unknown protein                                                                                                 | -1.209 | 5.40E-07 |
| At1g27700 | Syntaxin/t-SNARE family protein                                                                                 | 1.812  | 1.86E-08 |
| At1g27720 | TAF4 (TBP-associated factor 4)                                                                                  | 4.733  | 8.52E-13 |
| At1g27730 | STZ (salt tolerance zinc finger); Related to Cys2/His2-type zinc-finger proteins found in higher plants. Compe  | 2.962  | 1.95E-08 |
| At1g27760 | ATSAT32 (SALT-TOLERANCE 32); Encodes a protein with similarity to human interferon-related developm             | 1.087  | 6.27E-06 |
| At1g27820 | Polynucleotidyl transferase, ribonuclease H-like superfamily protein                                            | 2.821  | 2.74E-09 |
| At1g27890 | Polynucleotidyl transferase, ribonuclease H-like superfamily protein                                            | 3.078  | 7.43E-10 |
| At1g27930 | Protein of unknown function (DUF579); Function unknown. Interacts with eIF3.                                    | -1.056 | 1.05E-06 |
| At1g28010 | PGP14 (P-glycoprotein 14)                                                                                       | -1.519 | 4.62E-07 |
| At1g28050 | B-box type zinc finger protein with CCT domain                                                                  | -1.134 | 8.44E-08 |
| At1g28190 | unknown protein                                                                                                 | 1.572  | 4.41E-08 |
| At1g28230 | PUP1 (purine permease 1); Encodes a transporter that transports purines,cytokinins and other adenine derivati   | -1.401 | 1.95E-05 |
| At1g28330 | DRM1 (DORMANCY-ASSOCIATED PROTEIN 1); dormancy-associated protein (DRM1)                                        | -2.596 | 2.55E-08 |
| At1g28380 | NSL1 (necrotic spotted lesions 1); This gene is predicted to encode a protein involved in negatively regulating | 1.632  | 2.40E-07 |
| At1g28400 | unknown protein                                                                                                 | -1.117 | 0.0001   |
| At1g28440 | HSL1 (HAESA-like 1)                                                                                             | -1.111 | 4.79E-06 |
| At1g28660 | GDSL-like Lipase/Acylhydrolase superfamily protein                                                              | -1.899 | 2.76E-07 |
| At1g28670 | ARAB-1 (GDSL-like Lipase/Acylhydrolase superfamily protein); Arabidopsis thaliana lipase                        | -1.016 | 6.36E-08 |
| At1g28710 | Nucleotide-diphospho-sugar transferase family protein                                                           | -1.025 | 8.46E-06 |
| At1g29150 | ATS9 (non-ATPase subunit 9); specifically interacts with FUS6/COP11 via the C-terminal domain of FUS6/C         | 1.727  | 1.18E-08 |
| At1g29195 | unknown protein                                                                                                 | 1.255  | 8.00E-06 |
| At1g29220 | transcriptional regulator family protein                                                                        | 1.144  | 1.89E-07 |
| At1g29330 | AERD2 (ARABIDOPSIS ENDOPLASMIC RETICULUM RETENTION DEFECTIVE 2); Encodes a protein s                            | 1.739  | 7.65E-09 |
| At1g29340 | ATPUB17 (ARABIDOPSIS THALIANA PLANT U-BOX 17); Encodes a protein containing a UND, a U-box,                     | 1.349  | 9.14E-07 |
| At1g29395 | COR413-TM1 (COLD REGULATED 314 THYLAKOID MEMBRANE 1); Integral membrane protein in the i                        | -2.965 | 2.14E-09 |
| At1g29420 | SAUR-like auxin-responsive protein family                                                                       | -1.152 | 9.31E-07 |
| At1g29430 | SAUR-like auxin-responsive protein family                                                                       | -1.589 | 5.69E-07 |
| At1g29440 | SAUR-like auxin-responsive protein family                                                                       | -2.086 | 8.33E-07 |
| At1g29450 | SAUR-like auxin-responsive protein family                                                                       | -2.066 | 1.68E-06 |
| At1g29460 | SAUR-like auxin-responsive protein family                                                                       | -2.83  | 1.06E-09 |
| At1g29500 | SAUR-like auxin-responsive protein family                                                                       | -1.817 | 3.98E-07 |
| At1g29510 | SAUR68 (SMALL AUXIN UPREGULATED 68)                                                                             | -1.483 | 1.86E-06 |
| At1g29640 | Protein of unknown function, DUF584                                                                             | 2.05   | 3.40E-08 |
| At1g29660 | GDSL-like Lipase/Acylhydrolase superfamily protein                                                              | -1.97  | 9.25E-07 |
| At1g29670 | GDSL-like Lipase/Acylhydrolase superfamily protein                                                              | -1.037 | 0.0012   |
| At1g29680 | Protein of unknown function (DUF1264)                                                                           | 5.49   | 6.56E-13 |
| At1g29690 | CAD1 (constitutively activated cell death 1); Encodes a protein containing a domain with significant homolog    | 3.073  | 2.24E-10 |
| At1g29724 | NA                                                                                                              | 1.237  | 4.37E-05 |
| At1g29770 | Haloacid dehalogenase-like hydrolase (HAD) superfamily protein                                                  | 1.46   | 2.81E-08 |
| At1g29785 | other RNA; Potential natural antisense gene, locus overlaps with AT1G29780                                      | 1.182  | 4.79E-05 |
| At1g29810 | Transcriptional coactivator/pterin dehydratase                                                                  | 1.855  | 1.53E-10 |
| At1g29820 | Magnesium transporter CorA-like family protein                                                                  | 2      | 3.84E-08 |
| At1g30060 | COPI-interacting protein-related                                                                                | 2.582  | 1.76E-06 |
| At1g30070 | SGS domain-containing protein                                                                                   | 5.413  | 3.67E-12 |
| At1g30210 | TCP24 (TEOSINTE BRANCHED 1, cycloidea, and PCF family 24); TCP family protein involved in heterochr             | -1.111 | 3.39E-07 |
| At1g30280 | Chaperone DnaJ-domain superfamily protein                                                                       | -1.857 | 2.40E-08 |
| At1g30320 | Remorin family protein                                                                                          | 1.433  | 5.13E-09 |
| At1g30360 | ERD4 (early-responsive to dehydration 4)                                                                        | -1.35  | 5.05E-06 |
| At1g30370 | alpha/beta-Hydrolases superfamily protein                                                                       | 2.227  | 0.00173  |
| At1g30390 | non-LTR retrotransposon family (LINE), has a 1.9e-17 P-value blast match to GB:AAB41224 ORF2 (LINE-el           | 1.069  | 1.47E-05 |
| At1g30455 | transcription regulators                                                                                        | 1.824  | 9.49E-09 |
| At1g30473 | Heavy metal transport/detoxification superfamily protein                                                        | 1.192  | 0.0462   |

|           |                                                                                                                  |        |          |
|-----------|------------------------------------------------------------------------------------------------------------------|--------|----------|
| At1g30475 | BEST Arabidopsis thaliana protein match is: embryo defective 1303 (TAIR:AT1G56200.1)                             | 3.257  | 1.55E-10 |
| At1g30480 | DRT111 (DNA-DAMAGE-REPAIR/TOLERATION PROTEIN 111); recombination and DNA-damage resista                          | 1.722  | 3.41E-08 |
| At1g30570 | HERK2 (hercules receptor kinase 2); Encodes HERCULES2 (HERK2), a receptor kinase regulated by Brassin            | -1.018 | 4.89E-07 |
| At1g30620 | HSR8 (HIGH SUGAR RESPONSE8); encodes a type-II membrane protein that catalyzes 4-epimerization of U              | 1.131  | 5.19E-08 |
| At1g30700 | FAD-binding Berberine family protein                                                                             | 2.642  | 3.02E-05 |
| At1g30720 | FAD-binding Berberine family protein                                                                             | 1.047  | 0.00025  |
| At1g30755 | Protein of unknown function (DUF668)                                                                             | 3.617  | 2.81E-12 |
| At1g30810 | Transcription factor jumonji (jnj) family protein / zinc finger (C5HC2 type) family protein                      | 1.339  | 1.09E-06 |
| At1g30840 | ATPUP4 (purine permease 4); Member of a family of proteins related to PUP1, a purine transporter. May be ir      | -1.484 | 1.94E-06 |
| At1g31130 | unknown protein                                                                                                  | 1.166  | 1.60E-05 |
| At1g31173 | MIR167D (microRNA167D); Encodes a microRNA that targets ARF family members ARF6 and ARF8. Micr                   | -1.517 | 1.18E-05 |
| At1g31230 | AK-HSDH (ASPARTATE KINASE-HOMOSERINE DEHYDROGENASE); Encodes a bifunctional aspartate                            | -1.25  | 5.11E-06 |
| At1g31240 | Bromodomain transcription factor                                                                                 | -1.116 | 2.81E-06 |
| At1g31280 | AGO2 (argonaute 2); An Argonaute gene                                                                            | 2.405  | 1.43E-09 |
| At1g31290 | AGO3 (ARGONAUTE 3)                                                                                               | 1.907  | 3.54E-06 |
| At1g31335 | unknown protein                                                                                                  | 2.3    | 6.78E-09 |
| At1g31350 | KUF1 (KAR-UP F-box 1)                                                                                            | 2.145  | 2.42E-08 |
| At1g31370 | Ubiquitin-specific protease family C19-related protein                                                           | 3.163  | 2.16E-11 |
| At1g31490 | HXXXD-type acyl-transferase family protein                                                                       | -2     | 1.00E-06 |
| At1g31550 | GDSL-like Lipase/Acylhydrolase superfamily protein                                                               | -1.1   | 5.28E-07 |
| At1g31580 | ECS1; Encodes cell wall protein. ECS1 is not a Xcc750 resistance gene, but the genetic data indicate that ECS    | 1.196  | 0.00018  |
| At1g31690 | Copper amine oxidase family protein                                                                              | -1.093 | 6.23E-05 |
| At1g32330 | ATHSFA1D (heat shock transcription factor A1D); Member of Heat Stress Transcription Factor (Hsf) family. 1       | 2.905  | 9.22E-11 |
| At1g32350 | AOX1D (alternative oxidase 1D)                                                                                   | 2.185  | 0.0255   |
| At1g32375 | F-box/RNI-like/FBD-like domains-containing protein                                                               | 1.198  | 2.29E-05 |
| At1g32540 | LOL1 (lso one like 1); Encodes a protein with 3 plant-specific zinc finger domains that acts as a positive regul | -1.955 | 1.32E-08 |
| At1g32780 | GroES-like zinc-binding dehydrogenase family protein                                                             | 1.002  | 0.00013  |
| At1g32870 | ANAC013 (Arabidopsis NAC domain containing protein 13)                                                           | 2.168  | 4.67E-10 |
| At1g32880 | ARM repeat superfamily protein                                                                                   | 3.412  | 1.54E-08 |
| At1g32920 | unknown protein                                                                                                  | 1.45   | 6.85E-06 |
| At1g32928 | unknown protein                                                                                                  | 2.29   | 2.05E-08 |
| At1g32940 | SBT3.5 (Subtilase family protein)                                                                                | 1.608  | 8.75E-06 |
| At1g32950 | Subtilase family protein                                                                                         | 1.044  | 7.52E-05 |
| At1g32960 | SBT3.3 (Subtilase family protein)                                                                                | 2.983  | 1.47E-07 |
| At1g32970 | Subtilisin-like serine endopeptidase family protein                                                              | 2.002  | 8.88E-07 |
| At1g33030 | O-methyltransferase family protein                                                                               | 2.354  | 1.14E-06 |
| At1g33090 | MATE efflux family protein                                                                                       | 1.355  | 1.10E-07 |
| At1g33160 | pseudogene, similar to actin, blastp match of 74% identity and 8.3e-48 P-value to GP 9965319 gb AAG10041.        | 2.589  | 1.08E-08 |
| At1g33430 | Galactosyltransferase family protein                                                                             | 2.225  | 6.45E-09 |
| At1g33440 | Major facilitator superfamily protein                                                                            | -1.107 | 1.35E-05 |
| At1g33500 | unknown protein                                                                                                  | 4.074  | 6.32E-12 |
| At1g33510 | pseudogene, hypothetical protein                                                                                 | 3.053  | 2.93E-11 |
| At1g33560 | ADR1 (ACTIVATED DISEASE RESISTANCE 1); Encodes a NBS-LRR disease resistance protein that posse                   | 1.083  | 0.0001   |
| At1g33700 | Beta-glucosidase, GBA2 type family protein                                                                       | -1.29  | 5.35E-07 |
| At1g33720 | CYP76C6 (cytochrome P450, family 76, subfamily C, polypeptide 6); member of CYP76C                               | -1.413 | 0.0003   |
| At1g33811 | GDSL-like Lipase/Acylhydrolase superfamily protein                                                               | -1.528 | 3.19E-05 |
| At1g33855 | MuDr-element domain (Mutator-like transposase family, has a 1.7e-18 P-value blast match to Q9SKL7 /23-18:        | 5.74   | 6.82E-11 |
| At1g34042 | unknown protein                                                                                                  | 4.889  | 4.63E-12 |
| At1g34260 | FAB1D (FORMS APLOID AND BINUCLEATE CELLS 1A); Encodes a protein that is predicted to act as a pl                 | 1.429  | 1.36E-07 |
| At1g34575 | FAD-binding Berberine family protein                                                                             | 1.501  | 0.00453  |
| At1g34580 | Major facilitator superfamily protein                                                                            | -1.152 | 0.00012  |
| At1g34640 | peptidases                                                                                                       | -1.069 | 2.76E-06 |
| At1g35140 | EXL7 (EXORDIUM LIKE 7); At1g35140 (At1g35140/T32G9_32) mRNA, complete cds                                        | 1.189  | 0.0382   |
| At1g35210 | unknown protein                                                                                                  | 2.065  | 1.15E-06 |
| At1g35612 | expressed protein (transposable element gene); pseudogene of Ulp1 protease family protein                        | -1.932 | 2.90E-08 |
| At1g35660 | unknown protein                                                                                                  | 2.576  | 6.51E-10 |
| At1g35730 | APUM9 (pumilio 9); Encodes a member of the Arabidopsis Pumilio (APUM) proteins containing PUF domain             | 2.231  | 1.83E-08 |
| At1g35910 | Haloacid dehalogenase-like hydrolase (HAD) superfamily protein                                                   | 2.628  | 1.39E-08 |
| At1g36340 | UBC31 (ubiquitin-conjugating enzyme 31)                                                                          | 2.204  | 1.69E-09 |
| At1g36370 | SHM7 (serine hydroxymethyltransferase 7); Encodes a putative serine hydroxymethyltransferase.                    | 3.682  | 3.67E-10 |
| At1g36380 | unknown protein                                                                                                  | 1.015  | 1.92E-08 |
| At1g36622 | unknown protein                                                                                                  | 1.351  | 2.21E-05 |
| At1g36940 | unknown protein                                                                                                  | -1.486 | 7.29E-08 |
| At1g42490 | pseudogene, glutamate dehydrogenase (fragment), blastp match of 78% identity and 1.6e-94 P-value to GP 15C       | -1.038 | 9.34E-06 |
| At1g42590 | pseudogene, hypothetical protein (transposable element gene)                                                     | 2.246  | 2.36E-06 |
| At1g42970 | GAPB (glyceraldehyde-3-phosphate dehydrogenase B subunit); Encodes chloroplast localized glyceraldehyde-         | 1.132  | 1.53E-05 |
| At1g42980 | Actin-binding FH2 (formin homology 2) family protein                                                             | 1.967  | 0.0058   |

|           |                                                                                                                 |        |          |
|-----------|-----------------------------------------------------------------------------------------------------------------|--------|----------|
| At1g42990 | ATBZIP60 (basic region/leucine zipper motif 60); AtbZIP60 consists of a bZIP DNA binding domain followed        | 2.25   | 1.58E-10 |
| At1g43000 | PLATZ transcription factor family protein                                                                       | 4.805  | 6.81E-12 |
| At1g44100 | AAP5 (amino acid permease 5); amino acid permease 5                                                             | -1.336 | 2.08E-05 |
| At1g44160 | HSP40/DnaJ peptide-binding protein                                                                              | -1.05  | 0.00016  |
| At1g44350 | ILL6 (IAA-leucine resistant (ILR)-like gene 6); encodes a protein similar to IAA amino acid conjugate hydrolase | 2.519  | 1.21E-08 |
| At1g44382 | pseudogene, similar to putative AP endonuclease/reverse transcriptase, blastp match of 48% identity and 5.3e-   | -1.159 | 4.64E-05 |
| At1g44414 | unknown protein                                                                                                 | 7.399  | 1.00E-12 |
| At1g44800 | nodulin MtN21 /EamA-like transporter family protein                                                             | -1.526 | 4.50E-07 |
| At1g44830 | Integrase-type DNA-binding superfamily protein; encodes a member of the DREB subfamily A-5 of ERF/AP2           | -1.129 | 4.56E-05 |
| At1g44970 | Peroxidase superfamily protein                                                                                  | 1.758  | 6.65E-05 |
| At1g45145 | ATH5 (THIOREDOXIN H-TYPE 5); encodes a cytosolic thioredoxin that reduces disulfide bridges of target p         | 1.608  | 0.0008   |
| At1g45249 | ABF2 (abscisic acid responsive elements-binding factor 2); Leucine zipper transcription factor that binds to th | -1.337 | 6.25E-08 |
| At1g45616 | AtRLP6 (receptor like protein 6)                                                                                | -1.829 | 0.00025  |
| At1g46554 | other RNA                                                                                                       | -1.587 | 1.93E-08 |
| At1g46768 | RAP2.1 (related to AP2 1); encodes a member of the DREB subfamily A-5 of ERF/AP2 transcription factor fa        | -1.708 | 1.74E-06 |
| At1g47510 | 5PTASE11 (inositol polyphosphate 5-phosphatase 11); Encodes a phosphatidylinositol polyphosphate 5-phos         | 1.942  | 1.28E-06 |
| At1g47630 | CYP96A7 (cytochrome P450, family 96, subfamily A, polypeptide 7); member of CYP96A                              | 1.125  | 1.43E-05 |
| At1g47655 | Dof-type zinc finger DNA-binding family protein                                                                 | -1.031 | 2.21E-06 |
| At1g48040 | Protein phosphatase 2C family protein                                                                           | 1.544  | 1.85E-08 |
| At1g48260 | CIPK17 (CBL-interacting protein kinase 17); Encodes a member of the SNF1-related kinase (SnRK) gene fan         | -1.065 | 0.00019  |
| At1g48330 | unknown protein                                                                                                 | -1.343 | 5.05E-07 |
| At1g48405 | Kinase interacting (KIP1-like) family protein                                                                   | 4.902  | 1.30E-08 |
| At1g48700 | 2-oxoglutarate (2OG) and Fe(II)-dependent oxygenase superfamily protein                                         | 4.138  | 1.02E-11 |
| At1g48720 | unknown protein                                                                                                 | 6.228  | 4.81E-11 |
| At1g48745 | unknown protein                                                                                                 | 1.911  | 1.37E-07 |
| At1g48870 | Transducin/WD40 repeat-like superfamily protein                                                                 | 2.334  | 8.89E-10 |
| At1g49050 | Eukaryotic aspartyl protease family protein                                                                     | 1.138  | 9.85E-06 |
| At1g49130 | B-box type zinc finger protein with CCT domain                                                                  | -2.237 | 0.0016   |
| At1g49200 | RING/U-box superfamily protein                                                                                  | -1.772 | 2.71E-07 |
| At1g49210 | RING/U-box superfamily protein                                                                                  | -2.202 | 8.71E-08 |
| At1g49220 | RING/U-box superfamily protein                                                                                  | -1.37  | 1.69E-06 |
| At1g49230 | RING/U-box superfamily protein                                                                                  | -2.104 | 7.97E-10 |
| At1g49250 | ATP-dependent DNA ligase                                                                                        | 1.171  | 9.14E-07 |
| At1g49310 | unknown protein                                                                                                 | -1.084 | 0.00059  |
| At1g49370 | pseudogene, similar to OSJNBa0072F16.8, blastp match of 42% identity and 6.6e-73 P-value to GP 21739229         | -1.977 | 4.08E-09 |
| At1g49560 | Homeodomain-like superfamily protein                                                                            | 1.252  | 6.88E-07 |
| At1g49570 | Peroxidase superfamily protein                                                                                  | 1.429  | 0.00149  |
| At1g49620 | KRP7 (KIP-RELATED PROTEIN 7); Kip-related protein (KRP) gene, encodes CDK (cyclin-dependent kinase              | 1.781  | 1.88E-08 |
| At1g49650 | alpha/beta-Hydrolases superfamily protein                                                                       | -1.066 | 2.94E-05 |
| At1g49660 | AtCXE5 (carboxylesterase 5); Encodes a protein with carboxylesterase whose activity was tested using pNA.       | -1.119 | 5.17E-07 |
| At1g49710 | FUT12 (fucosyltransferase 12); Encodes a protein with core &alpha;1,3-fucosyltransferase activity.              | 1.826  | 6.08E-10 |
| At1g49790 | F-box associated ubiquitination effector family protein                                                         | 3.416  | 1.56E-11 |
| At1g49860 | ATGSTF14 (glutathione S-transferase (class phi) 14); Encodes glutathione transferase belonging to the phi cla   | -1.443 | 0.00135  |
| At1g50140 | P-loop containing nucleoside triphosphate hydrolases superfamily protein                                        | 1.184  | 4.72E-07 |
| At1g50400 | Eukaryotic porin family protein                                                                                 | 3.058  | 7.79E-08 |
| At1g50630 | Protein of unknown function (DUF3537)                                                                           | 1.718  | 5.72E-09 |
| At1g50640 | ERF3 (ethylene responsive element binding factor 3); encodes a member of the ERF (ethylene response factor)     | 1.022  | 8.02E-05 |
| At1g50740 | Transmembrane proteins 14C                                                                                      | 2.75   | 1.03E-08 |
| At1g51270 | structural molecules                                                                                            | 1.443  | 3.47E-06 |
| At1g51340 | MATE efflux family protein                                                                                      | 1.931  | 6.79E-08 |
| At1g51440 | alpha/beta-Hydrolases superfamily protein; Encodes a lipase that hydrolyzes phosphatidylcholine, glycolipids :  | -1.692 | 5.15E-09 |
| At1g51530 | RNA-binding (RRM/RBD/RNP motifs) family protein                                                                 | 1.319  | 1.80E-06 |
| At1g51610 | Cation efflux family protein                                                                                    | -1.128 | 4.98E-08 |
| At1g51620 | Protein kinase superfamily protein                                                                              | 2.053  | 4.73E-07 |
| At1g51670 | unknown protein                                                                                                 | 1.334  | 0.0004   |
| At1g51790 | Leucine-rich repeat protein kinase family protein                                                               | -1.125 | 0.00199  |
| At1g51820 | Leucine-rich repeat protein kinase family protein                                                               | 1.396  | 0.00016  |
| At1g51830 | Leucine-rich repeat protein kinase family protein                                                               | -1.304 | 0.00155  |
| At1g51940 | protein kinase family protein / peptidoglycan-binding LysM domain-containing protein                            | -1.405 | 3.42E-06 |
| At1g52190 | Major facilitator superfamily protein                                                                           | -2.125 | 9.70E-08 |
| At1g52290 | Protein kinase superfamily protein                                                                              | -1.075 | 1.50E-06 |
| At1g52560 | HSP20-like chaperones superfamily protein                                                                       | 10.796 | 1.66E-13 |
| At1g52565 | unknown protein                                                                                                 | 1.27   | 1.16E-07 |
| At1g52690 | Late embryogenesis abundant protein (LEA) family protein                                                        | 4.586  | 0.00018  |
| At1g52720 | unknown protein                                                                                                 | -1.176 | 8.77E-06 |
| At1g52750 | alpha/beta-Hydrolases superfamily protein                                                                       | -1.041 | 0.00013  |
| At1g52790 | 2-oxoglutarate (2OG) and Fe(II)-dependent oxygenase superfamily protein; encodes a putative oxidoreductase,     | 3.01   | 1.93E-05 |



|           |                                                                                                               |        |          |
|-----------|---------------------------------------------------------------------------------------------------------------|--------|----------|
| At1g52800 | 2-oxoglutarate (2OG) and Fe(II)-dependent oxygenase superfamily protein                                       | -1.154 | 0.00083  |
| At1g52830 | IAA6 (indole-3-acetic acid 6); An extragenic dominant suppressor of the hy2 mutant phenotype. Also exhibits   | -1.605 | 0.0002   |
| At1g52870 | Peroxisomal membrane 22 kDa (Mpv17/PMP22) family protein                                                      | 2.671  | 1.73E-08 |
| At1g52890 | ANAC019 (NAC domain containing protein 19); encodes a NAC transcription factor whose expression is indu       | -2.327 | 2.48E-05 |
| At1g52940 | PAP5 (purple acid phosphatase 5)                                                                              | -2.383 | 0.00099  |
| At1g53035 | unknown protein                                                                                               | -1.868 | 1.19E-08 |
| At1g53040 | Protein of unknown function (DUF616)                                                                          | -1.19  | 8.09E-07 |
| At1g53100 | Core-2/I-branching beta-1,6-N-acetylglucosaminyltransferase family protein                                    | -2.064 | 3.06E-05 |
| At1g53180 | unknown protein                                                                                               | 1.535  | 2.28E-06 |
| At1g53230 | TCP3 (TEOSINTE BRANCHED 1, cycloidea and PCF transcription factor 3); Encodes a member of a recently          | -1.233 | 6.56E-06 |
| At1g53430 | Leucine-rich repeat transmembrane protein kinase                                                              | 1.793  | 4.20E-08 |
| At1g53540 | HSP20-like chaperones superfamily protein                                                                     | 11.45  | 3.21E-12 |
| At1g53590 | NTMC2T6.1 (Calcium-dependent lipid-binding (CaLB domain) family protein)                                      | 1.225  | 1.96E-08 |
| At1g53625 | unknown protein                                                                                               | 1.967  | 8.46E-05 |
| At1g53840 | ATPME1 (pectin methylesterase 1); encodes a pectin methylesterase                                             | -1.107 | 2.56E-07 |
| At1g53870 | Protein of unknown function (DUF567)                                                                          | -2.978 | 1.73E-09 |
| At1g53885 | Protein of unknown function (DUF581)                                                                          | -1.613 | 0.00052  |
| At1g53980 | Ubiquitin-like superfamily protein                                                                            | 2.189  | 1.52E-06 |
| At1g54050 | HSP20-like chaperones superfamily protein                                                                     | 7.358  | 5.82E-13 |
| At1g54070 | Dormancy/auxin associated family protein                                                                      | 3.824  | 1.41E-10 |
| At1g54120 | unknown protein                                                                                               | -1     | 5.66E-06 |
| At1g54410 | dehydrin family protein                                                                                       | -1.013 | 1.40E-05 |
| At1g54570 | Esterase/lipase/thioesterase family protein                                                                   | -1.008 | 0.0005   |
| At1g54660 | pseudogene, similar to vetispiradiene synthase, blastp match of 54% identity and 3.0e-79 P-value to GP 53606  | -1.262 | 0.0008   |
| At1g54820 | Protein kinase superfamily protein                                                                            | -1.313 | 4.31E-07 |
| At1g55152 | unknown protein                                                                                               | -1.25  | 1.54E-05 |
| At1g55230 | Family of unknown function (DUF716)                                                                           | 3.587  | 2.36E-09 |
| At1g55250 | HUB2 (histone mono-ubiquitination 2); Encodes one of two orthologous E3 ubiquitin ligases in Arabidopsis th   | 1.053  | 4.22E-07 |
| At1g55255 | NA                                                                                                            | 1.058  | 3.60E-07 |
| At1g55290 | 2-oxoglutarate (2OG) and Fe(II)-dependent oxygenase superfamily protein; encodes a protein whose sequence     | 3.227  | 3.05E-07 |
| At1g55300 | TAF7 (TBP-associated factor 7)                                                                                | 1.765  | 3.00E-10 |
| At1g55310 | SCL33 (SC35-LIKE SPLICING FACTOR 33); Encodes a SR spliceosome protein that is localized to nuclear s         | 2.077  | 8.40E-11 |
| At1g55380 | Cysteine/Histidine-rich C1 domain family protein                                                              | -1.834 | 1.52E-07 |
| At1g55450 | S-adenosyl-L-methionine-dependent methyltransferases superfamily protein                                      | 1.714  | 1.37E-05 |
| At1g55525 | other RNA; Unknown gene                                                                                       | 1.636  | 9.63E-08 |
| At1g55530 | RING/U-box superfamily protein                                                                                | 4.175  | 2.20E-12 |
| At1g55620 | CLC-F (chloride channel F); Encodes a chloride channel protein that has been localized to the chloroplast and | 1.459  | 4.29E-09 |
| At1g55800 | Domain of unknown function (DUF2431)                                                                          | 2.753  | 4.54E-06 |
| At1g55940 | CYP708A1 (cytochrome P450, family 708, subfamily A, polypeptide 1); member of CYP708A                         | -1.029 | 0.00096  |
| At1g56010 | anac021 (Arabidopsis NAC domain containing protein 21); Encodes a transcription factor involved in shoot ar   | -1.84  | 4.28E-06 |
| At1g56060 | unknown protein                                                                                               | 4.765  | 3.92E-05 |
| At1g56140 | Leucine-rich repeat transmembrane protein kinase                                                              | 2.019  | 1.45E-10 |
| At1g56170 | NF-YC2 (nuclear factor Y, subunit C2); Encodes a protein with similarity to a subunit of the CCAAT promot     | 2.141  | 1.01E-07 |
| At1g56220 | Dormancy/auxin associated family protein                                                                      | -1.64  | 3.45E-07 |
| At1g56240 | AtPP2-B13 (phloem protein 2-B13)                                                                              | 2.202  | 0.001    |
| At1g56250 | AtPP2-B14 (phloem protein 2-B14)                                                                              | 1.955  | 7.22E-05 |
| At1g56320 | BEST Arabidopsis thaliana protein match is: Glycine-rich protein family (TAIR:AT5G49350.2)                    | 3.585  | 2.72E-09 |
| At1g56350 | Peptide chain release factor 2                                                                                | 1.006  | 6.77E-08 |
| At1g56410 | ERD2 (EARLY-RESPONSIVE TO DEHYDRATION 2); encodes a heat shock protein whose gene expression                  | 1.691  | 4.80E-07 |
| At1g56440 | Tetratricopeptide repeat (TPR)-like superfamily protein                                                       | 2.175  | 6.54E-10 |
| At1g56600 | AtGolS2 (galactinol synthase 2)                                                                               | 1.271  | 4.23E-05 |
| At1g56710 | Pectin lyase-like superfamily protein                                                                         | -1.83  | 5.74E-07 |
| At1g57630 | Toll-Interleukin-Resistance (TIR) domain family protein                                                       | 2.434  | 0.01714  |
| At1g57765 | unknown protein                                                                                               | 1.098  | 5.58E-08 |
| At1g57810 | pseudogene, similar to putative AP endonuclease/reverse transcriptase, blastp match of 29% identity and 1.1e- | 1.732  | 1.33E-07 |
| At1g57990 | ATPUP18 (purine permease 18); Member of a family of proteins related to PUP1, a purine transporter. May be    | 1.88   | 1.30E-06 |
| At1g58130 | pseudogene, putative heat shock transcription factor HSF30                                                    | 2.649  | 5.03E-08 |
| At1g58170 | Disease resistance-responsive (dirigent-like protein) family protein                                          | 2.078  | 5.93E-10 |
| At1g58420 | Uncharacterised conserved protein UCP031279                                                                   | 1.407  | 0.0001   |
| At1g58450 | Tetratricopeptide repeat (TPR)-like superfamily protein                                                       | 1.207  | 1.70E-08 |
| At1g59590 | ZCF37; ZCF37 mRNA, complete cds                                                                               | 2.161  | 8.62E-08 |
| At1g59660 | Nucleoporin autopeptidase                                                                                     | 1.131  | 0.00029  |
| At1g59700 | ATGSTU16 (glutathione S-transferase TAU 16); Encodes glutathione transferase belonging to the tau class of    | 1.011  | 1.55E-05 |
| At1g59850 | ARM repeat superfamily protein                                                                                | 1.171  | 0.00056  |
| At1g59860 | HSP20-like chaperones superfamily protein                                                                     | 8.335  | 5.62E-13 |
| At1g59910 | Actin-binding FH2 (formin homology 2) family protein                                                          | 1.913  | 1.64E-08 |
| At1g59920 | MADS-box family protein                                                                                       | -1.077 | 5.93E-05 |

|           |                                                                                                                |        |          |
|-----------|----------------------------------------------------------------------------------------------------------------|--------|----------|
| At1g59930 | MADS-box family protein                                                                                        | -1.033 | 1.57E-05 |
| At1g59950 | NAD(P)-linked oxidoreductase superfamily protein                                                               | 1.552  | 4.56E-05 |
| At1g59980 | ARL2 (ARG1-like 2)                                                                                             | 2.275  | 4.65E-10 |
| At1g60010 | unknown protein                                                                                                | -1.151 | 2.47E-07 |
| At1g60140 | ATTPS10 (trehalose phosphate synthase); Encodes an enzyme putatively involved in trehalose biosynthesis. T     | -1.049 | 5.08E-06 |
| At1g60190 | ARM repeat superfamily protein                                                                                 | 1.406  | 6.89E-07 |
| At1g60450 | AtGolS7 (galactinol synthase 7)                                                                                | -1.347 | 0.01701  |
| At1g60470 | AtGolS4 (galactinol synthase 4)                                                                                | 1.462  | 6.59E-08 |
| At1g60680 | NAD(P)-linked oxidoreductase superfamily protein                                                               | -1.134 | 2.61E-07 |
| At1g60730 | NAD(P)-linked oxidoreductase superfamily protein                                                               | 1.858  | 2.39E-05 |
| At1g60740 | Thioredoxin superfamily protein                                                                                | 1.504  | 0.00581  |
| At1g60750 | NAD(P)-linked oxidoreductase superfamily protein                                                               | 3.254  | 2.21E-09 |
| At1g60800 | NIK3 (NSP-interacting kinase 3)                                                                                | -1.033 | 3.08E-07 |
| At1g60970 | SNARE-like superfamily protein                                                                                 | 2.967  | 5.74E-11 |
| At1g61070 | LCR66 (low-molecular-weight cysteine-rich 66); Predicted to encode a PR (pathogenesis-related) protein. Bel    | -1.399 | 8.40E-05 |
| At1g61120 | GES (GERANYLLINALOOL SYNTHASE); Encodes a geranylinalool synthase that produces a precursor to 7               | -1.078 | 0.03852  |
| At1g61140 | EDA16 (embryo sac development arrest 16)                                                                       | 1.977  | 0.0003   |
| At1g61240 | Protein of unknown function (DUF707)                                                                           | -1.08  | 4.14E-07 |
| At1g61250 | SC3 (secretory carrier 3); Encodes a putative secretory carrier membrane protein (SC3).                        | 1.081  | 6.18E-07 |
| At1g61255 | BEST Arabidopsis thaliana protein match is: glycine-rich protein (TAIR:AT4G21620.2)                            | -1.161 | 6.05E-05 |
| At1g61280 | Phosphatidylinositol N-acetylglucosaminyltransferase, GPI19/PIG-P subunit                                      | 1.312  | 3.36E-05 |
| At1g61360 | S-locus lectin protein kinase family protein                                                                   | 1.086  | 2.67E-05 |
| At1g61415 | unknown protein                                                                                                | 1.763  | 1.01E-08 |
| At1g61460 | S-locus protein kinase, putative                                                                               | 1.614  | 1.49E-08 |
| At1g61470 | Polynucleotidyl transferase, ribonuclease H-like superfamily protein                                           | 2.908  | 7.92E-10 |
| At1g61550 | S-locus lectin protein kinase family protein                                                                   | 2.268  | 2.15E-07 |
| At1g61560 | ATMLO6 (MILDEW RESISTANCE LOCUS O 6); A member of a large family of seven-transmembrane doma                   | 3.948  | 2.84E-12 |
| At1g61610 | S-locus lectin protein kinase family protein                                                                   | 1.348  | 4.26E-05 |
| At1g61720 | BAN (BANYULS); Negative regulator of flavonoid biosynthesis, mutants accumulate flavonoid pigments in th       | 2.16   | 5.81E-10 |
| At1g61740 | Sulfite exporter TauE/SafE family protein                                                                      | -2.396 | 6.83E-12 |
| At1g62000 | unknown protein                                                                                                | 1.064  | 0.0014   |
| At1g62010 | Mitochondrial transcription termination factor family protein                                                  | 1.357  | 3.22E-07 |
| At1g62030 | Cysteine/Histidine-rich C1 domain family protein                                                               | -1.068 | 1.09E-06 |
| At1g62080 | unknown protein                                                                                                | 2.114  | 7.29E-07 |
| At1g62090 | pseudogene, protein kinase family, similar to light repressible receptor protein kinase (LRRPK) (Arabidopsis t | 3.257  | 3.44E-11 |
| At1g62180 | APR2 (5'adenylylphosphosulfate reductase 2); encodes a adenosine 5'-phosphosulfate reductase, involved in su   | 1.255  | 7.01E-07 |
| At1g62190 | Kua-ubiquitin conjugating enzyme hybrid localisation domain                                                    | 1.428  | 2.54E-05 |
| At1g62390 | Octicosapeptide/Phox/Bem1p (PB1) domain-containing protein / tetratricopeptide repeat (TPR)-containing prc     | 1.021  | 7.06E-07 |
| At1g62400 | HT1 (high leaf temperature 1)                                                                                  | -1.778 | 1.97E-08 |
| At1g62420 | Protein of unknown function (DUF506)                                                                           | 1.61   | 2.40E-08 |
| At1g62480 | Vacuolar calcium-binding protein-related                                                                       | -1.193 | 0.00014  |
| At1g62560 | FMO GS-OX3 (flavin-monooxygenase glucosinolate S-oxygenase 3); belongs to the flavin-monooxygenase (Fl         | -3.066 | 1.79E-11 |
| At1g62570 | FMO GS-OX4 (flavin-monooxygenase glucosinolate S-oxygenase 4); belongs to the flavin-monooxygenase (Fl         | 1.452  | 1.01E-05 |
| At1g62600 | Flavin-binding monooxygenase family protein                                                                    | 1.875  | 1.07E-09 |
| At1g62730 | Terpenoid synthases superfamily protein                                                                        | 1.947  | 6.49E-09 |
| At1g62740 | stress-inducible protein, putative                                                                             | 2.5    | 5.48E-10 |
| At1g62770 | Plant invertase/pectin methylesterase inhibitor superfamily protein                                            | -2.449 | 8.56E-08 |
| At1g62800 | ASP4 (aspartate aminotransferase 4); Encodes aspartate aminotransferase (Asp4).                                | -1.836 | 2.39E-08 |
| At1g62835 | pseudogene, similar to putative AP endonuclease/reverse transcriptase, blastp match of 39% identity and 1.2e-  | -1.377 | 5.06E-08 |
| At1g62840 | Protein of unknown function (DUF1442)                                                                          | 1.034  | 1.11E-05 |
| At1g62930 | Tetratricopeptide repeat (TPR)-like superfamily protein                                                        | -1.019 | 7.81E-07 |
| At1g63130 | Tetratricopeptide repeat (TPR)-like superfamily protein; Transacting siRNA generating locus. Its derived siR9. | -1.34  | 2.97E-07 |
| At1g63250 | DEA(D/H)-box RNA helicase family protein                                                                       | 1.072  | 1.41E-06 |
| At1g63340 | Flavin-containing monooxygenase family protein                                                                 | 1.513  | 4.91E-07 |
| At1g63350 | Disease resistance protein (CC-NBS-LRR class) family                                                           | 1.353  | 1.86E-07 |
| At1g63360 | Disease resistance protein (CC-NBS-LRR class) family                                                           | 1.201  | 3.86E-06 |
| At1g63370 | Flavin-binding monooxygenase family protein                                                                    | 1.613  | 1.08E-09 |
| At1g63390 | FAD/NAD(P)-binding oxidoreductase family protein                                                               | 1.583  | 2.79E-09 |
| At1g63400 | Pentatricopeptide repeat (PPR) superfamily protein                                                             | -1.013 | 6.91E-07 |
| At1g63530 | BEST Arabidopsis thaliana protein match is: hydroxyproline-rich glycoprotein family protein (TAIR:AT1G63:      | 2.395  | 2.86E-06 |
| At1g63710 | CYP86A7 (cytochrome P450, family 86, subfamily A, polypeptide 7); Encodes a member of the CYP86A subf          | -1.171 | 0.00018  |
| At1g63720 | BEST Arabidopsis thaliana protein match is: hydroxyproline-rich glycoprotein family protein (TAIR:AT5G52:      | 1.886  | 1.22E-07 |
| At1g63750 | Disease resistance protein (TIR-NBS-LRR class) family                                                          | 1.358  | 0.0001   |
| At1g63820 | CCT motif family protein                                                                                       | 2.326  | 4.13E-08 |
| At1g63830 | PLAC8 family protein                                                                                           | 1.08   | 3.20E-07 |
| At1g63840 | RING/U-box superfamily protein                                                                                 | 2.116  | 4.53E-10 |
| At1g63880 | Disease resistance protein (TIR-NBS-LRR class) family; Encodes a TIR-NBS-LRR class of disease resistance       | -1.092 | 6.13E-08 |

|           |                                                                                                              |        |          |
|-----------|--------------------------------------------------------------------------------------------------------------|--------|----------|
| At1g63930 | ROH1 (from the Czech 'roh' meaning 'corner')                                                                 | 1.942  | 1.45E-09 |
| At1g64065 | Late embryogenesis abundant (LEA) hydroxyproline-rich glycoprotein family                                    | 2.365  | 0.0015   |
| At1g64107 | Putative membrane lipoprotein; Encodes a defensin-like (DEFL) family protein.                                | 1.04   | 3.02E-07 |
| At1g64110 | P-loop containing nucleoside triphosphate hydrolases superfamily protein                                     | 2.166  | 3.53E-07 |
| At1g64195 | Defensin-like (DEFL) family protein; Encodes a defensin-like (DEFL) family protein.                          | 5.228  | 3.78E-10 |
| At1g64200 | VHA-E3 (vacuolar H <sup>+</sup> -ATPase subunit E isoform 3)                                                 | 2.546  | 7.16E-11 |
| At1g64330 | myosin heavy chain-related                                                                                   | -1.054 | 1.16E-07 |
| At1g64460 | Protein kinase superfamily protein                                                                           | 1.788  | 4.78E-09 |
| At1g64470 | Ubiquitin-like superfamily protein                                                                           | 1.601  | 1.85E-07 |
| At1g64500 | Glutaredoxin family protein                                                                                  | 2.089  | 1.23E-06 |
| At1g64530 | Plant regulator RWP-RK family protein                                                                        | 1.152  | 3.12E-08 |
| At1g64561 | unknown protein                                                                                              | 2.574  | 1.59E-09 |
| At1g64563 | other RNA                                                                                                    | 1.582  | 8.59E-07 |
| At1g64640 | ENODL8 (early nodulin-like protein 8)                                                                        | -1.504 | 3.90E-08 |
| At1g64690 | BLT (BRANCHLESS TRICHOME); Encodes BRANCHLESS TRICHOME (BLT) involved in trichome devel                      | -1.079 | 7.81E-06 |
| At1g64730 | pseudogene, putative NADH dehydrogenase subunit F, blastp match of 68% identity and 5.3e-08 P-value to G     | -1.228 | 0.00019  |
| At1g64780 | AMT1.2 (ammonium transporter 1.2); encodes an ammonium transporter protein believed to act as a high affir   | 2.224  | 1.44E-06 |
| At1g64820 | MATE efflux family protein                                                                                   | 2.212  | 5.08E-07 |
| At1g64930 | CYP89A7 (cytochrome P450, family 87, subfamily A, polypeptide 7); member of CYP89A                           | 1.237  | 4.15E-07 |
| At1g64940 | CYP89A6 (cytochrome P450, family 87, subfamily A, polypeptide 6); member of CYP89A                           | 1.493  | 1.77E-08 |
| At1g64950 | CYP89A5 (cytochrome P450, family 89, subfamily A, polypeptide 5); member of CYP89A                           | 1.782  | 1.60E-08 |
| At1g64970 | G-TMT (gamma-tocopherol methyltransferase); gamma-tocopherol methyltransferase (g-TMT) mRNA, nuclea          | 1.525  | 1.16E-07 |
| At1g65010 | INVOLVED IN: flower development (Plant protein of unknown function (DUF827)); Putative role in flower d      | -1.163 | 6.25E-08 |
| At1g65040 | RING/U-box superfamily protein                                                                               | 1.349  | 1.90E-09 |
| At1g65240 | Eukaryotic aspartyl protease family protein                                                                  | 2.209  | 3.43E-05 |
| At1g65370 | TRAF-like family protein                                                                                     | -1.103 | 0.00045  |
| At1g65390 | ATPP2-A5 (phloem protein 2 A5)                                                                               | 2.376  | 1.01E-06 |
| At1g65481 | unknown protein                                                                                              | -1.227 | 0.01619  |
| At1g65790 | ARK1 (receptor kinase 1); An alternatively spliced gene that encodes a functional transmembrane receptor ser | -2.159 | 7.31E-07 |
| At1g65860 | FMO GS-OX1 (flavin-monooxygenase glucosinolate S-oxygenase 1); belongs to the flavin-monooxygenase (F        | -3.797 | 2.86E-10 |
| At1g65980 | TPX1 (thioredoxin-dependent peroxidase 1); thioredoxin-dependent peroxidase                                  | 1.041  | 4.19E-08 |
| At1g65985 | Plant protein of unknown function (DUF247)                                                                   | -1.261 | 7.79E-08 |
| At1g66060 | Family of unknown function (DUF577)                                                                          | 2.355  | 9.66E-08 |
| At1g66080 | unknown protein                                                                                              | 4.61   | 1.19E-11 |
| At1g66090 | Disease resistance protein (TIR-NBS class)                                                                   | 5.918  | 8.17E-08 |
| At1g66160 | CMPG1 (CYS, MET, PRO, and GLY protein 1)                                                                     | 2.274  | 8.80E-08 |
| At1g66180 | Eukaryotic aspartyl protease family protein                                                                  | -1.461 | 1.24E-05 |
| At1g66345 | Pentatricopeptide repeat (PPR) superfamily protein                                                           | -1.03  | 1.98E-08 |
| At1g66350 | RGL1 (RGA-like 1); Negative regulator of GA responses, member of GRAS family of transcription factors. A     | -1.255 | 1.18E-07 |
| At1g66480 | PMI2 (plastid movement impaired 2); Involved in chloroplast avoidance movement under intermediate and hig    | 1.17   | 1.30E-05 |
| At1g66500 | Pre-mRNA cleavage complex II                                                                                 | 3.674  | 1.63E-09 |
| At1g66510 | AAR2 protein family                                                                                          | 3.761  | 9.15E-12 |
| At1g66550 | WRKY67 (WRKY DNA-binding protein 67); member of WRKY Transcription Factor; Group III                         | 1.443  | 0.00108  |
| At1g66580 | RPL10C (ribosomal protein L10 C)                                                                             | 2.457  | 1.87E-10 |
| At1g66600 | ABO3 (ABA overly sensitive mutant 3); A member of WRKY Transcription Factor; Group III. Involved in the      | 4.348  | 4.89E-08 |
| At1g66700 | PXMT1 (S-adenosyl-L-methionine-dependent methyltransferases superfamily protein); A member of the Arabi      | 2.374  | 0.0068   |
| At1g66725 | MIR163 (microRNA163); Encodes a microRNA that targets several SAMT family members. miR163, is highl          | 2.863  | 7.80E-09 |
| At1g66870 | Carbohydrate-binding X8 domain superfamily protein                                                           | -1.021 | 0.02577  |
| At1g66890 | FUNCTIONS IN: molecular_function unknown; INVOLVED IN: biological_process unknown; LOCATED IN                | -1.238 | 2.43E-06 |
| At1g67050 | unknown protein                                                                                              | -1.285 | 1.79E-07 |
| At1g67060 | unknown protein                                                                                              | 1.476  | 7.52E-08 |
| At1g67100 | LBD40 (LOB domain-containing protein 40)                                                                     | 1.316  | 0.00213  |
| At1g67105 | other RNA                                                                                                    | 1.077  | 0.00062  |
| At1g67265 | DVL3 (DEVIL 3)                                                                                               | -3.25  | 2.09E-09 |
| At1g67300 | Major facilitator superfamily protein                                                                        | 1.219  | 0.0056   |
| At1g67330 | Protein of unknown function (DUF579)                                                                         | -1.234 | 4.40E-08 |
| At1g67360 | Rubber elongation factor protein (REF)                                                                       | 4.334  | 3.10E-11 |
| At1g67365 | other RNA; Potential natural antisense gene, locus overlaps with ATIG67370                                   | 4.712  | 1.31E-12 |
| At1g67370 | ASY1 (ASYNAPTIC 1); meiotic asynaptic mutant 1 (ASY1). ASY1 protein is initially distributed as numerot      | 2.14   | 3.46E-07 |
| At1g67390 | F-box family protein                                                                                         | 1.059  | 8.96E-07 |
| At1g67440 | emb1688 (embryo defective 1688)                                                                              | 1.103  | 1.77E-07 |
| At1g67460 | Minichromosome maintenance (MCM2/3/5) family protein                                                         | 1.784  | 4.88E-07 |
| At1g67470 | Protein kinase superfamily protein                                                                           | 1.06   | 4.75E-06 |
| At1g67510 | Leucine-rich repeat protein kinase family protein                                                            | -1.306 | 1.05E-08 |
| At1g67600 | Acid phosphatase/vanadium-dependent haloperoxidase-related protein                                           | -1.066 | 7.22E-05 |
| At1g67710 | ARR11 (response regulator 11); Encodes an Arabidopsis response regulator (ARR) protein that acts in concert  | -1.239 | 3.19E-07 |
| At1g67800 | Copine (Calcium-dependent phospholipid-binding protein) family                                               | 1.049  | 2.07E-05 |

|           |                                                                                                                 |        |          |
|-----------|-----------------------------------------------------------------------------------------------------------------|--------|----------|
| At1g67810 | SUFE2 (sulfur E2); Encodes a protein capable of stimulating the cysteine desulfurase activity of CpNifS (AT1    | 1.183  | 0.00027  |
| At1g67850 | Protein of unknown function (DUF707)                                                                            | 1.314  | 2.43E-09 |
| At1g67856 | RING/U-box superfamily protein                                                                                  | 1.956  | 2.73E-08 |
| At1g67910 | unknown protein                                                                                                 | -1.396 | 4.88E-08 |
| At1g67920 | unknown protein                                                                                                 | 3.838  | 4.00E-10 |
| At1g68020 | TPS6 (TREHALOSE -6-PHOSPHATASE SYNTHASE S6); Encodes an enzyme putatively involved in trehalc                   | -1.07  | 1.04E-06 |
| At1g68050 | FKF1 (flavin-binding, kelch repeat, f box 1); Encodes FKF1, a flavin-binding kelch repeat F box protein, is clo | -1.006 | 4.47E-07 |
| At1g68130 | AtIDD14 (indeterminate(ID)-domain 14)                                                                           | -1.34  | 1.18E-07 |
| At1g68140 | Protein of unknown function (DUF1644)                                                                           | 2.042  | 8.44E-11 |
| At1g68150 | WRKY9 (WRKY DNA-binding protein 9); member of WRKY Transcription Factor; Group II-b                             | 1.308  | 2.44E-06 |
| At1g68190 | B-box zinc finger family protein                                                                                | -1.031 | 1.56E-05 |
| At1g68200 | Zinc finger C-x8-C-x5-C-x3-H type family protein                                                                | 1.529  | 1.70E-08 |
| At1g68238 | unknown protein                                                                                                 | -1.664 | 8.56E-08 |
| At1g68280 | Thioesterase superfamily protein                                                                                | 1.113  | 1.37E-06 |
| At1g68300 | Adenine nucleotide alpha hydrolases-like superfamily protein                                                    | 2.399  | 9.25E-10 |
| At1g68310 | Protein of unknown function (DUF59); Encodes a protein that has been shown to specifically interact with a se   | 2.319  | 2.30E-10 |
| At1g68320 | AtMYB62 (myb domain protein 62); putative transcription factor: R2R3-MYB transcription family. Involved         | 2.018  | 1.91E-08 |
| At1g68330 | unknown protein                                                                                                 | 1.237  | 2.75E-06 |
| At1g68350 | unknown protein                                                                                                 | -1.021 | 4.08E-05 |
| At1g68360 | C2H2 and C2HC zinc fingers superfamily protein                                                                  | -1.201 | 9.94E-07 |
| At1g68390 | Core-2/I-branching beta-1,6-N-acetylglucosaminyltransferase family protein                                      | 2.141  | 1.41E-08 |
| At1g68440 | unknown protein                                                                                                 | 1.762  | 2.44E-08 |
| At1g68450 | VQ motif-containing protein                                                                                     | 2.035  | 3.47E-08 |
| At1g68500 | unknown protein                                                                                                 | -1.503 | 1.37E-06 |
| At1g68520 | B-box type zinc finger protein with CCT domain                                                                  | -1.72  | 0.0028   |
| At1g68560 | ATXYL1 (ALPHA-XYLOSIDASE 1); Encodes a bifunctional alpha-l-arabinofuranosidase/beta-d-xylosidase t             | -1.448 | 7.24E-09 |
| At1g68620 | alpha/beta-Hydrolases superfamily protein                                                                       | 3.367  | 4.51E-06 |
| At1g68630 | PLAC8 family protein                                                                                            | 2.738  | 1.31E-06 |
| At1g68690 | Protein kinase superfamily protein                                                                              | 1.541  | 6.54E-07 |
| At1g68740 | PHO1 (EXS (ERD1/XPR1/SYG1) family protein); Encodes PHO1;H1, a member of the PHO1 family. Involve               | -1.527 | 9.56E-06 |
| At1g68800 | BRC2 (BRANCHED 2); Encodes a TCP transcription factor, closely related to teosinte branched1, arrests axil      | -1.392 | 1.39E-06 |
| At1g69040 | ACR4 (ACT domain repeat 4); ACT-domain containing protein involved in feedback regulation of amino acid         | -1.184 | 4.80E-06 |
| At1g69330 | RING/U-box superfamily protein                                                                                  | -1.126 | 2.20E-08 |
| At1g69410 | ATELF5A-3 (EUKARYOTIC ELONGATION FACTOR 5A-3); Encodes eIF5A-2, a putative eukaryotic transl                    | 1.18   | 3.00E-05 |
| At1g69530 | ATEXPA1 (expansin A1); Member of Alpha-Expansin Gene Family. Naming convention from the Expansin V              | -2.143 | 2.21E-09 |
| At1g69545 | NA                                                                                                              | -1.326 | 1.11E-07 |
| At1g69572 | other RNA; Potential natural antisense gene, locus overlaps with AT1G69570                                      | -2.4   | 1.55E-06 |
| At1g69580 | Homeodomain-like superfamily protein                                                                            | -1.103 | 5.90E-06 |
| At1g69600 | ATHB29 (ARABIDOPSIS THALIANA HOMEODOMAIN PROTEIN 29); Encodes ZFHD1, a member of the zinc                       | 1.269  | 7.95E-07 |
| At1g69640 | SBH1 (sphingoid base hydroxylase 1); Encodes one of the two redundant sphingoid base hydroxylases (SBH).        | 1.418  | 1.65E-07 |
| At1g69650 | TRAF-like family protein                                                                                        | 1.613  | 5.24E-06 |
| At1g69660 | TRAF-like family protein                                                                                        | 1.777  | 1.83E-08 |
| At1g69680 | Mog1/PsbP/DUF1795-like photosystem II reaction center PsbP family protein                                       | 1.596  | 2.06E-07 |
| At1g69730 | Wall-associated kinase family protein                                                                           | 2.802  | 6.45E-10 |
| At1g69750 | ATCOX19-2 (A. THALIANA CYTOCHROME C OXIDASE 19-2)                                                               | 1.025  | 2.76E-07 |
| At1g69790 | Protein kinase superfamily protein                                                                              | 1.619  | 3.57E-07 |
| At1g69820 | GGT3 (gamma-glutamyl transpeptidase 3); Note that conflicting nomenclature exists in the literature: At1g698    | 1.82   | 1.08E-07 |
| At1g69830 | AMY3 (alpha-amylase-like 3); Encodes a plastid-localized &#945;-amylase. Expression is reduced in the SEX       | -1.115 | 6.41E-07 |
| At1g69840 | SPFH/Band 7/PHB domain-containing membrane-associated protein family                                            | 1.487  | 0.0122   |
| At1g69870 | NRT1.7 (nitrate transporter 1.7); Encodes a low affinity nitrate transporter NRT1.7. Expressed in phloem. Re    | -1.819 | 2.33E-05 |
| At1g69900 | Actin cross-linking protein                                                                                     | 1.434  | 5.60E-06 |
| At1g69920 | ATGSTU12 (ARABIDOPSIS THALIANA GLUTATHIONE S-TRANSFERASE TAU 12); Encodes glutathio                             | 2.042  | 3.79E-05 |
| At1g70020 | Protein of unknown function (DUF1163)                                                                           | -1.004 | 4.53E-05 |
| At1g70140 | ATFH8 (formin 8); Encodes a group I formin. Binds to F-actin barbed ends. Has severing actin filaments activ    | 1.24   | 1.55E-05 |
| At1g70290 | TPS8 (trehalose-6-phosphatase synthase S8); Encodes an enzyme putatively involved in trehalose biosynthesis     | -1.392 | 2.06E-05 |
| At1g70300 | KUP6 (K <sup>+</sup> uptake permease 6); potassium transporter                                                  | 1.478  | 2.85E-07 |
| At1g70530 | CRK3 (cysteine-rich RLK (RECEPTOR-like protein kinase) 3); Encodes a cysteine-rich receptor-like protein k      | 1.614  | 1.43E-08 |
| At1g70560 | SAV3 (SHADE AVOIDANCE 3); TAA1 is involved in the shade-induced production of indole-3-pyruvate (IP             | -1.015 | 5.20E-08 |
| At1g70590 | F-box family protein                                                                                            | 1.313  | 8.65E-08 |
| At1g70610 | ATTAP1 (transporter associated with antigen processing protein 1); member of TAP subfamily                      | 1.147  | 0.0029   |
| At1g70690 | HWI1 (HOPW1-1-INDUCED GENE1); Encodes a plasmodesmal protein that may be involved in the intercell              | -1.282 | 5.64E-05 |
| At1g70820 | phosphoglucomutase, putative / glucose phosphomutase, putative                                                  | -1.82  | 1.93E-08 |
| At1g70890 | MPL43 (MPL-like protein 43)                                                                                     | -1.21  | 2.26E-06 |
| At1g70920 | ATHB18 (homeobox-leucine zipper protein 18)                                                                     | -1.163 | 1.79E-07 |
| At1g70940 | ATPIN3 (ARABIDOPSIS PIN-FORMED 3); A regulator of auxin efflux and involved in differential growth. P           | -1.283 | 5.40E-07 |
| At1g71000 | Chaperone DnaJ-domain superfamily protein                                                                       | 8.672  | 6.22E-09 |
| At1g71030 | ATMYBL2 (ARABIDOPSIS MYB-LIKE 2); Encodes a putative myb family transcription factor. In contrast t             | -1.916 | 3.21E-06 |

|           |                                                                                                               |        |          |
|-----------|---------------------------------------------------------------------------------------------------------------|--------|----------|
| At1g71170 | 6-phosphogluconate dehydrogenase family protein                                                               | 1.246  | 1.59E-08 |
| At1g71230 | CSN5B (COP9-signalosome 5B); Encodes a subunit of the COP9 complex, similar to JAB1, a specific mamm          | 2.428  | 4.43E-10 |
| At1g71250 | GDSL-like Lipase/Acylhydrolase superfamily protein                                                            | 2.912  | 7.16E-11 |
| At1g71390 | AtRLP11 (receptor like protein 11)                                                                            | -1.241 | 0.01952  |
| At1g71520 | Integrase-type DNA-binding superfamily protein; encodes a member of the DREB subfamily A-5 of ERF/AP2         | 5.396  | 3.43E-11 |
| At1g71530 | Protein kinase superfamily protein                                                                            | 2.864  | 8.37E-09 |
| At1g71697 | ATCK1 (choline kinase 1); Encodes choline kinase. mRNA levels are increased in response to wounding.          | 1.871  | 1.20E-07 |
| At1g71710 | DNase I-like superfamily protein                                                                              | -1.085 | 2.24E-07 |
| At1g71770 | PAB5 (poly(A)-binding protein 5); Encodes a Class I polyA-binding protein. Expressed in floral organs. Binds  | 2.216  | 5.35E-07 |
| At1g71910 | unknown protein                                                                                               | -1.171 | 6.96E-06 |
| At1g71970 | unknown protein                                                                                               | -1.69  | 9.99E-09 |
| At1g72060 | serine-type endopeptidase inhibitors                                                                          | 1.174  | 8.98E-05 |
| At1g72070 | Chaperone DnaJ-domain superfamily protein                                                                     | -1.067 | 2.53E-05 |
| At1g72100 | late embryogenesis abundant domain-containing protein / LEA domain-containing protein                         | 3.445  | 4.10E-12 |
| At1g72130 | Major facilitator superfamily protein                                                                         | -1.224 | 3.47E-07 |
| At1g72141 | unknown protein                                                                                               | 1.815  | 3.63E-07 |
| At1g72150 | PATL1 (PATELLIN 1); novel cell-plate-associated protein that is related in sequence to proteins involved in r | -1.941 | 1.61E-05 |
| At1g72230 | Cupredoxin superfamily protein                                                                                | -1.388 | 2.08E-05 |
| At1g72280 | AERO1 (endoplasmic reticulum oxidoreductins 1); endoplasmic reticulum oxidoreductin                           | 2.259  | 9.17E-09 |
| At1g72416 | Chaperone DnaJ-domain superfamily protein                                                                     | 2.622  | 8.66E-10 |
| At1g72530 | plastid developmental protein DAG, putative                                                                   | 1.284  | 1.62E-07 |
| At1g72600 | hydroxyproline-rich glycoprotein family protein                                                               | -1.218 | 1.05E-06 |
| At1g72620 | alpha/beta-Hydrolases superfamily protein                                                                     | -1.268 | 4.15E-05 |
| At1g72660 | P-loop containing nucleoside triphosphate hydrolases superfamily protein                                      | 8.028  | 1.31E-14 |
| At1g72680 | ATCAD1 (CINNAMYL ALCOHOL DEHYDROGENASE 1)                                                                     | 1.227  | 1.52E-06 |
| At1g72750 | ATTIM23-2 (translocase inner membrane subunit 23-2)                                                           | 1.493  | 5.48E-09 |
| At1g72760 | Protein kinase superfamily protein                                                                            | 1.015  | 6.87E-06 |
| At1g72770 | HAB1 (homology to ABI1); mutant has ABA hypersensitive inhibition of seed germination; Protein Phosphata      | 1.001  | 9.29E-06 |
| At1g72800 | RNA-binding (RRM/RBD/RNP motifs) family protein                                                               | 1.043  | 0.00034  |
| At1g72890 | Disease resistance protein (TIR-NBS class)                                                                    | -1.482 | 2.83E-07 |
| At1g72930 | TIR (toll/interleukin-1 receptor-like); Toll/interleukin-1 receptor-like protein (TIR) mRNA,                  | 1.375  | 5.53E-05 |
| At1g72940 | Toll-Interleukin-Resistance (TIR) domain-containing protein                                                   | 2.443  | 7.60E-08 |
| At1g73010 | ATPS2 (phosphate starvation-induced gene 2)                                                                   | -2.209 | 0.0026   |
| At1g73040 | Mannose-binding lectin superfamily protein                                                                    | 1.025  | 0.00397  |
| At1g73080 | ATPEPR1 (PEP1 RECEPTOR 1); Encodes a leucine-rich repeat receptor kinase. Functions as a receptor for A       | 1.022  | 4.70E-07 |
| At1g73220 | 1-Oct (organic cation/carnitine transporter1)                                                                 | -2.258 | 0.00189  |
| At1g73250 | ATFX (ACTIVATING TRANSCRIPTION FACTOR 5); encodes a bifunctional 3, 5-epimerase-4-reductase in                | 1.507  | 6.03E-09 |
| At1g73260 | ATKTI1 (ARABIDOPSIS THALIANA KUNITZ TRYPSIN INHIBITOR 1); Encodes a trypsin inhibitor invol                   | -1.888 | 0.00981  |
| At1g73340 | Cytochrome P450 superfamily protein                                                                           | 2.836  | 8.37E-12 |
| At1g73380 | unknown protein                                                                                               | 1.489  | 3.31E-08 |
| At1g73480 | alpha/beta-Hydrolases superfamily protein                                                                     | 1.424  | 7.78E-06 |
| At1g73600 | S-adenosyl-L-methionine-dependent methyltransferases superfamily protein                                      | -1.824 | 3.09E-07 |
| At1g73670 | ATMPK15 (MAP kinase 15); member of MAP Kinase                                                                 | 1.115  | 2.39E-05 |
| At1g73690 | AT.CDKD.1 (CYCLIN-DEPENDENT KINASE D1); cyclin dependent kinase activator CDKD;1. Nuclear loca                | 2.227  | 1.24E-09 |
| At1g73700 | MATE efflux family protein                                                                                    | 1.263  | 2.84E-06 |
| At1g73730 | ATSLIM (ARABIDOPSIS THALIANA SULFUR LIMITATION 1); Encodes a putative transcription factor in                 | 1.491  | 1.40E-08 |
| At1g73740 | UDP-Glycosyltransferase superfamily protein                                                                   | 3.775  | 2.25E-11 |
| At1g73750 | Uncharacterised conserved protein UCP031088, alpha/beta hydrolase                                             | 1.015  | 0.00015  |
| At1g73810 | Core-2/I-branching beta-1,6-N-acetylglucosaminyltransferase family protein                                    | 3.228  | 0.00016  |
| At1g73830 | BEE3 (BR enhanced expression 3)                                                                               | -1.324 | 1.60E-07 |
| At1g74055 | unknown protein                                                                                               | -1.209 | 7.45E-06 |
| At1g74080 | ATMYB122 (MYB DOMAIN PROTEIN 122); Encodes a putative transcription factor, member of the R2R3 f              | -1.081 | 0.0456   |
| At1g74090 | ATSOT18 (DESULFO-GLUCOSINOLATE SULFOTRANSFERASE 18); encodes a desulfoglucosinolate sulf                      | -2.952 | 3.22E-11 |
| At1g74200 | AtRLP16 (receptor like protein 16)                                                                            | -1.023 | 2.53E-07 |
| At1g74240 | Mitochondrial substrate carrier family protein                                                                | 1.331  | 3.57E-08 |
| At1g74310 | ATHSP101 (heat shock protein 101); Encodes ClpB1, which belongs to the Casein lytic proteinase/heat shock     | 5.876  | 8.14E-12 |
| At1g74320 | Protein kinase superfamily protein; encodes a choline kinase, whose expression is induced by high salt and ma | 2.613  | 3.69E-10 |
| At1g74330 | Protein kinase superfamily protein                                                                            | 2.1    | 1.41E-09 |
| At1g74360 | Leucine-rich repeat protein kinase family protein                                                             | 1.404  | 0.00049  |
| At1g74450 | Protein of unknown function (DUF793)                                                                          | 1.081  | 7.10E-06 |
| At1g74458 | unknown protein                                                                                               | -1.417 | 6.82E-07 |
| At1g74590 | ATGSTU10 (GLUTATHIONE S-TRANSFERASE TAU 10); Encodes glutathione transferase belonging to the                 | 1.767  | 0.00062  |
| At1g74660 | MIF1 (mini zinc finger 1); Constitutive overexpression of MIF1 caused dramatic developmental defects, seedli  | -1.277 | 2.21E-07 |
| At1g74670 | Gibberellin-regulated family protein                                                                          | -2.424 | 0.0002   |
| At1g74740 | CDPK1A (CALCIUM-DEPENDENT PROTEIN KINASE 1A); member of Calcium Dependent Protein Kinase                      | 1.317  | 2.51E-08 |
| At1g74810 | BOR5 (HCO3- transporter family)                                                                               | 1.363  | 5.39E-05 |
| At1g74870 | RING/U-box superfamily protein                                                                                | 2.027  | 2.45E-07 |

|           |                                                                                                                  |        |          |
|-----------|------------------------------------------------------------------------------------------------------------------|--------|----------|
| At1g74930 | ORA47 (Integrase-type DNA-binding superfamily protein); encodes a member of the DREB subfamily A-5 of            | -1.415 | 5.81E-06 |
| At1g75020 | LPAT4 (lysophosphatidyl acyltransferase 4)                                                                       | 1.012  | 0.0002   |
| At1g75270 | DHAR2 (dehydroascorbate reductase 2)                                                                             | 3.046  | 3.28E-09 |
| At1g75280 | NmrA-like negative transcriptional regulator family protein; isoflavone reductase, putative, identical to SP:P52 | 3.252  | 9.54E-11 |
| At1g75300 | NmrA-like negative transcriptional regulator family protein; encodes a protein whose sequence is similar to an   | 1.632  | 6.36E-06 |
| At1g75360 | unknown protein                                                                                                  | -1.232 | 1.48E-06 |
| At1g75380 | ATBBD1 (bifunctional nuclease in basal defense response 1); Encodes a nucleases AtBBD1 involved in ABA-          | -1.11  | 0.0004   |
| At1g75500 | WAT1 (Walls Are Thin 1); An Arabidopsis thaliana homolog of Medicago truncatula NODULIN21 (MtN21).               | -1.001 | 0.0003   |
| At1g75780 | TUB1 (tubulin beta-1 chain); beta tubulin gene downregulated by phytochrome A (phyA)-mediated far-red lig        | -1.037 | 0.0037   |
| At1g75810 | unknown protein                                                                                                  | 1.648  | 3.80E-10 |
| At1g75820 | CLV1 (CLAVATA 1); Putative receptor kinase with an extracellular leucine-rich domain. Controls shoot and f       | -1.008 | 2.07E-06 |
| At1g75880 | SGNH hydrolase-type esterase superfamily protein                                                                 | -2.314 | 2.60E-07 |
| At1g75900 | GDSL-like Lipase/Acylhydrolase superfamily protein                                                               | -1.543 | 6.80E-05 |
| At1g75960 | AMP-dependent synthetase and ligase family protein                                                               | -1.37  | 0.0006   |
| At1g76070 | unknown protein                                                                                                  | 4.738  | 2.13E-12 |
| At1g76160 | sks5 (SKU5 similar 5)                                                                                            | -1.144 | 8.53E-05 |
| At1g76430 | PHT1.9 (phosphate transporter 1.9); Encodes Pht1;9, a member of the Pht1 family of phosphate transporters w      | -1.137 | 0.0032   |
| At1g76470 | NAD(P)-binding Rossmann-fold superfamily protein                                                                 | 2.031  | 1.68E-05 |
| At1g76530 | Auxin efflux carrier family protein                                                                              | 2.347  | 1.69E-09 |
| At1g76600 | unknown protein                                                                                                  | 1.718  | 1.94E-06 |
| At1g76640 | Calcium-binding EF-hand family protein                                                                           | 1.309  | 0.02293  |
| At1g76650 | CML38 (calmodulin-like 38)                                                                                       | 1.316  | 0.00594  |
| At1g76680 | ATOPR1 (ARABIDOPSIS 12-OXOPHYTODIENOATE REDUCTASE 1); Encodes a member of an alpha/bet                           | 3.391  | 2.13E-08 |
| At1g76690 | ATOPR2 (ARABIDOPSIS 12-OXOPHYTODIENOATE REDUCTASE 2); Encodes one of the closely related                         | 1.418  | 1.02E-05 |
| At1g76700 | DNAJ heat shock N-terminal domain-containing protein                                                             | 1.465  | 9.85E-10 |
| At1g76760 | ATY1 (thioredoxin Y1); Encodes a y-type thioredoxin (Trx-y1) localized in chloroplast stroma.                    | 1.167  | 1.40E-06 |
| At1g76800 | Vacuolar iron transporter (VIT) family protein                                                                   | -1.286 | 6.06E-07 |
| At1g76878 | other RNA; Potential natural antisense gene, locus overlaps with AT1G76880                                       | 2.392  | 4.32E-09 |
| At1g76890 | GT2 (Duplicated homeodomain-like superfamily protein); encodes a plant trihelix DNA-binding protein              | -1.374 | 3.59E-07 |
| At1g76900 | AtTLP1 (tubby like protein 1); Member of TLP family                                                              | 1.065  | 1.29E-07 |
| At1g76965 | FUNCTIONS IN: molecular_function unknown; INVOLVED IN: biological_process unknown; LOCATED IN                    | 4.443  | 7.74E-12 |
| At1g76970 | Target of Myb protein 1                                                                                          | 2.298  | 3.27E-10 |
| At1g76980 | BEST Arabidopsis thaliana protein match is: embryo defective 2170 (TAIR:AT1G21390.1)                             | 1.888  | 3.30E-07 |
| At1g77000 | ATSKP2.2 (ARABIDOPSIS HOMOLOG OF HOMOLOG OF HUMAN SKP2 2); AtSKP2;2 is a homolog of f                            | 2.355  | 0.0185   |
| At1g77145 | Protein of unknown function (DUF506)                                                                             | -1.012 | 0.00038  |
| At1g77210 | AtSTP14 (sugar transport protein 14); AtSTP14 belongs to the family of sugar transport proteins (AtSTPs)in v     | -2.507 | 1.68E-08 |
| At1g77330 | 2-oxoglutarate (2OG) and Fe(II)-dependent oxygenase superfamily protein; similar to 1-aminocyclopropane-1-       | -1.02  | 4.44E-05 |
| At1g77390 | CYCA1 (CYCLIN A1); Encodes a core cell cycle gene involved in meiosis II during microsporogenesis. Rece:         | 1.285  | 6.44E-08 |
| At1g77410 | BGAL16 (beta-galactosidase 16)                                                                                   | 3.06   | 8.23E-11 |
| At1g77450 | anac032 (NAC domain containing protein 32)                                                                       | 2.801  | 3.64E-09 |
| At1g77460 | Armadillo/beta-catenin-like repeat                                                                               | 2.531  | 7.07E-07 |
| At1g77530 | O-methyltransferase family protein                                                                               | 2.249  | 2.54E-08 |
| At1g77570 | Winged helix-turn-helix transcription repressor DNA-binding                                                      | 3.09   | 4.04E-09 |
| At1g77590 | LACS9 (long chain acyl-CoA synthetase 9); Encodes major plastidic long chain acyl-CoA synthetase with a sli      | 1.258  | 1.02E-07 |
| At1g77640 | Integrase-type DNA-binding superfamily protein; encodes a member of the DREB subfamily A-5 of ERF/AP2            | -1.53  | 6.68E-06 |
| At1g77760 | NIA1 (nitrate reductase 1); Encodes the cytosolic minor isoform of nitrate reductase (NR). Involved in the first | -1.41  | 3.27E-07 |
| At1g77770 | Protein of unknown function (DUF1644)                                                                            | 1.065  | 9.36E-08 |
| At1g77870 | MUB5 (membrane-anchored ubiquitin-fold protein 5 precursor)                                                      | -1.153 | 9.81E-07 |
| At1g78000 | SEL1 (SELENATE RESISTANT 1); Encodes a sulfate transporter that can restore sulfate uptake capacity of a         | 1.303  | 0.0021   |
| At1g78160 | APUM7 (pumilio 7); Encodes a member of the Arabidopsis Pumilio (APUM) proteins containing PUF domain             | 1.494  | 2.22E-05 |
| At1g78170 | unknown protein                                                                                                  | -1.361 | 7.06E-08 |
| At1g78230 | Outer arm dynein light chain 1 protein                                                                           | -1.64  | 0.0002   |
| At1g78240 | QUA2 (QUASIMODO2); Encodes TSD2 (TUMOROUS SHOOT DEVELOPMENT2), a putative methyltransf                           | -1.1   | 1.16E-06 |
| At1g78310 | VQ motif-containing protein                                                                                      | 2.297  | 1.73E-09 |
| At1g78340 | ATGSTU22 (glutathione S-transferase TAU 22); Encodes glutathione transferase belonging to the tau class of       | 1.137  | 0.00063  |
| At1g78370 | ATGSTU20 (glutathione S-transferase TAU 20); Encodes glutathione transferase belonging to the tau class of       | -1.037 | 9.30E-07 |
| At1g78380 | ATGSTU19 (A. THALIANA GLUTATHIONE S-TRANSFERASE TAU 19); Encodes a glutathione transferas                        | 1.781  | 2.54E-08 |
| At1g78390 | ATNCED9 (NINE-CIS-EPOXYCAROTENOID DIOXYGENASE 9); Encodes 9-cis-epoxycarotenoid dioxyge                          | 2.396  | 5.28E-10 |
| At1g78400 | Pectin lyase-like superfamily protein                                                                            | 2.356  | 6.97E-08 |
| At1g78410 | VQ motif-containing protein                                                                                      | 2.712  | 3.96E-07 |
| At1g78450 | SOUL heme-binding family protein                                                                                 | -1.539 | 1.02E-05 |
| At1g78510 | SPS1 (solanesyl diphosphate synthase 1); Encodes a protein with solanesyl diphosphate synthase activity.         | 1.016  | 3.90E-06 |
| At1g78530 | Protein kinase superfamily protein                                                                               | -1.433 | 5.47E-05 |
| At1g78830 | Curculin-like (mannose-binding) lectin family protein                                                            | -1.373 | 9.56E-05 |
| At1g78895 | Reticulon family protein                                                                                         | 1.501  | 2.50E-09 |
| At1g78970 | ATLUP1 (ARABIDOPSIS THALIANA LUPEOL SYNTHASE 1); Lupeol synthase. Converts oxidosqualene t                       | -1.935 | 2.28E-07 |
| At1g78995 | unknown protein                                                                                                  | -1.337 | 6.86E-08 |

|           |                                                                                                               |        |          |
|-----------|---------------------------------------------------------------------------------------------------------------|--------|----------|
| At1g79110 | zinc ion binding                                                                                              | -1.446 | 1.03E-06 |
| At1g79245 | expressed protein, Several heterogeneous transcript sequences map to this position; pseudogene of unknown p   | 1.266  | 7.75E-05 |
| At1g79270 | ECT8 (evolutionarily conserved C-terminal region 8)                                                           | 1.177  | 0.0001   |
| At1g79460 | ATKS (ARABIDOPSIS THALIANA ENT-KAURENE SYNTHASE); Encodes for a protein with ent-kaurene                      | -1.192 | 4.73E-06 |
| At1g79510 | Uncharacterized conserved protein (DUF2358)                                                                   | 1.131  | 1.77E-06 |
| At1g79550 | PGK (phosphoglycerate kinase); Encodes cytosolic phosphoglycerate kinase (PGK).                               | 1.368  | 1.76E-06 |
| At1g79680 | WAKL10 (WALL ASSOCIATED KINASE (WAK)-LIKE 10)                                                                 | 3.112  | 6.21E-07 |
| At1g79700 | Integrase-type DNA-binding superfamily protein                                                                | -1.117 | 0.0002   |
| At1g79710 | Major facilitator superfamily protein                                                                         | 1.086  | 1.07E-06 |
| At1g79770 | Protein of unknown function (DUF1677)                                                                         | -2.006 | 1.12E-07 |
| At1g79800 | ENODL7 (early nodulin-like protein 7)                                                                         | 1.207  | 0.0047   |
| At1g79920 | Heat shock protein 70 (Hsp 70) family protein                                                                 | 2.228  | 1.06E-09 |
| At1g80120 | Protein of unknown function (DUF567)                                                                          | 1.185  | 4.11E-06 |
| At1g80130 | Tetratricopeptide repeat (TPR)-like superfamily protein                                                       | -1.355 | 0.0035   |
| At1g80310 | sulfate transmembrane transporters                                                                            | -1.106 | 1.18E-06 |
| At1g80440 | Galactose oxidase/kelch repeat superfamily protein                                                            | -1.569 | 3.73E-06 |
| At1g80470 | F-box/RNI-like/FBD-like domains-containing protein                                                            | 1.997  | 5.00E-08 |
| At1g80650 | RTL1 (RNase THREE-like protein 1)                                                                             | -1.007 | 2.20E-06 |
| At1g80670 | Transducin/WD40 repeat-like superfamily protein; This gene is predicted to encode a protein with a DWD mo     | 1.089  | 0.0006   |
| At1g80820 | CCR2 (cinnamoyl coa reductase); Encodes an cinnamoyl CoA reductase isoform. Involved in lignin biosynthe      | 2.941  | 2.40E-07 |
| At1g80840 | WRKY40 (WRKY DNA-binding protein 40); Pathogen-induced transcription factor. Binds W-box sequences            | 1.479  | 0.0081   |
| At1g80920 | J8 (Chaperone DnaJ-domain superfamily protein); A nuclear encoded soluble protein found in the chloroplast ;  | -1.132 | 6.03E-06 |
| At1g80940 | unknown protein                                                                                               | -1.006 | 3.40E-07 |
| At2g01020 | 5SrRNA (rRNA)                                                                                                 | -1.474 | 0.00888  |
| At2g01180 | ATPAP1 (phosphatidic acid phosphatase 1); Encodes phosphatidate phosphatase. Up-regulated by genotoxic s      | 2.374  | 1.31E-07 |
| At2g01200 | IAA32 (indole-3-acetic acid inducible 32); Belongs to auxin inducible gene family.                            | 1.224  | 5.01E-06 |
| At2g01370 | DNA-binding storekeeper protein-related transcriptional regulator                                             | 1.366  | 1.24E-07 |
| At2g01530 | MLP329 (MLP-like protein 329)                                                                                 | -2     | 0.00133  |
| At2g01600 | ENTH/ANTH/VHS superfamily protein                                                                             | 1.275  | 1.00E-06 |
| At2g01670 | atnudt17 (nudix hydrolase homolog 17)                                                                         | -1.455 | 1.83E-08 |
| At2g01740 | Tetratricopeptide repeat (TPR)-like superfamily protein                                                       | 1.578  | 2.26E-07 |
| At2g01880 | ATPAP7 (PURPLE ACID PHOSPHATASE 7)                                                                            | -1.164 | 0.00105  |
| At2g01890 | ATPAP8 (PURPLE ACID PHOSPHATASE 8); Encodes a purple acid phosphatase (PAP) belonging to the lov              | -1.594 | 2.24E-06 |
| At2g02010 | GAD4 (glutamate decarboxylase 4)                                                                              | 2.524  | 4.04E-07 |
| At2g02020 | Major facilitator superfamily protein                                                                         | -1.637 | 1.03E-07 |
| At2g02080 | AtIDD4 (indeterminate(ID)-domain 4)                                                                           | -1.412 | 1.34E-08 |
| At2g02100 | LCR69 (low-molecular-weight cysteine-rich 69); Predicted to encode a PR (pathogenesis-related) protein. Bel   | -1.417 | 6.43E-06 |
| At2g02130 | LCR68 (low-molecular-weight cysteine-rich 68); Predicted to encode a PR (pathogenesis-related) protein. Bel   | -1.007 | 1.01E-05 |
| At2g02220 | ATPSKR1 (PHYTOSULFOKIN RECEPTOR 1); Encodes a protein interacting with phytosulfokine, a five ami             | 1.996  | 4.85E-09 |
| At2g02750 | Pentatricopeptide repeat (PPR) superfamily protein                                                            | 1.453  | 3.28E-06 |
| At2g02860 | ATSUC3 (ARABIDOPSIS THALIANA SUCROSE TRANSPORTER 3); encodes a sucrose transporter in siev                    | 1.397  | 7.68E-07 |
| At2g02950 | PKS1 (phytochrome kinase substrate 1); Encodes a basic soluble protein which can independently bind to eith   | -1.452 | 9.06E-07 |
| At2g02980 | OTP85 (ORGANELLE TRANSCRIPT PROCESSING 85); Encodes a chloroplast RNA editing factor.                         | -1.098 | 1.31E-06 |
| At2g02990 | ATRNS1 (RIBONUCLEASE 1); member of the ribonuclease T2 family, responds to inorganic phosphate starv          | -1.524 | 0.02978  |
| At2g03290 | emp24/gp25L/p24 family/GOLD family protein                                                                    | 1.152  | 0.00032  |
| At2g03310 | unknown protein                                                                                               | -1.942 | 3.53E-07 |
| At2g03440 | NRP1 (nodulin-related protein 1); Induced at the transcriptional level by Pseudomonas syringae pv. tomato inf | -1.253 | 5.71E-07 |
| At2g03505 | Carbohydrate-binding X8 domain superfamily protein                                                            | 1.501  | 8.83E-07 |
| At2g03570 | unknown protein                                                                                               | -1.888 | 8.29E-06 |
| At2g03750 | P-loop containing nucleoside triphosphate hydrolases superfamily protein                                      | -1.103 | 2.33E-06 |
| At2g03760 | AtSOT12 (sulphotransferase 12); Encodes a brassinosteroid sulfotransferase. In vitro experiements show that t | 1.713  | 8.92E-05 |
| At2g03890 | ATPI4K GAMMA 7 (phosphoinositide 4-kinase gamma 7); Phosphoinositide kinase which undergo autophos            | -1.267 | 1.07E-07 |
| At2g03980 | GDSL-like Lipase/Acylhydrolase superfamily protein                                                            | -1.104 | 1.63E-06 |
| At2g04039 | unknown protein                                                                                               | 1.407  | 2.87E-07 |
| At2g04160 | AIR3 (AUXIN-INDUCED IN ROOT CULTURES 3); isolated from differential screening of a cDNA library fr            | -1.074 | 0.0005   |
| At2g04250 | pseudogene, hypothetical protein                                                                              | 1.339  | 1.21E-09 |
| At2g04350 | LACS8 (long-chain acyl-CoA synthetase 8)                                                                      | 1.921  | 1.32E-08 |
| At2g04380 | unknown protein                                                                                               | 2.492  | 1.35E-10 |
| At2g04520 | Nucleic acid-binding, OB-fold-like protein                                                                    | 1.371  | 4.41E-07 |
| At2g04570 | GDSL-like Lipase/Acylhydrolase superfamily protein                                                            | -1.39  | 0.00013  |
| At2g04600 | similar to unknown protein [Arabidopsis thaliana] (TAIR:AT2G13865.1)                                          | 2.785  | 7.29E-06 |
| At2g04622 | unknown protein                                                                                               | -1.026 | 0.04395  |
| At2g05050 | Protein phosphatase 2C family protein                                                                         | 1.492  | 7.75E-09 |
| At2g05160 | CCCH-type zinc fingerfamily protein with RNA-binding domain                                                   | -1.5   | 9.38E-07 |
| At2g05180 | CYP705A6 (cytochrome P450, family 705, subfamily A, polypeptide 6); member of CYP705A                         | 1.497  | 1.20E-07 |
| At2g05300 | pseudogene of the F-box protein family ; pseudogene of the F-box protein family                               | 1.684  | 4.61E-08 |
| At2g05518 | Unknown gene; Unknown gene                                                                                    | -1.856 | 6.37E-07 |



|           |                                                                                                                   |        |          |
|-----------|-------------------------------------------------------------------------------------------------------------------|--------|----------|
| At2g05540 | Glycine-rich protein family                                                                                       | -1.774 | 2.99E-05 |
| At2g06002 | other RNA                                                                                                         | -1.967 | 3.15E-05 |
| At2g06530 | VPS2.1 (SNF7 family protein)                                                                                      | 1.511  | 1.85E-07 |
| At2g06820 | similar to unknown protein [Arabidopsis thaliana] (TAIR:AT4G09700.1); similar to 80C09_29 [Brassica rapa          | -1.023 | 0.00447  |
| At2g06850 | EXGT-A1 (endoxyloglucan transferase A1); endoxyloglucan transferase (EXGT-A1) gene                                | -1.273 | 0.0002   |
| At2g07600 | pseudogene, NADH dehydrogenase, blastp match of 71% identity and 8.1e-159 P-value to GP 17932795 emb              | -1.298 | 2.82E-06 |
| At2g07680 | ATMRP11 (multidrug resistance-associated protein 11); member of MRP subfamily                                     | -1.188 | 1.44E-07 |
| At2g07719 | Putative membrane lipoprotein                                                                                     | 1.122  | 0.00365  |
| At2g07721 | unknown protein                                                                                                   | 1.07   | 6.39E-07 |
| At2g07731 | pseudogene, similar to NADH-ubiquinone oxidoreductase chain 6 (EC 1.6.5.3). (Field mustard), blastp match         | 4.417  | 1.19E-10 |
| At2g07750 | DEA(D/H)-box RNA helicase family protein                                                                          | 1.123  | 2.27E-06 |
| At2g07768 | Cytochrome C assembly protein                                                                                     | 1.078  | 0.00049  |
| At2g07774 | unknown protein                                                                                                   | -1.326 | 6.69E-07 |
| At2g07786 | pseudogene, similar to NADH dehydrogenase (ubiquinone), blastp match of 91% identity and 9.4e-39 P-value          | 1.128  | 0.00066  |
| At2g07815 | BEST Arabidopsis thaliana protein match is: cytochrome C biogenesis 452 (TAIR:ATMG00180.1)                        | -1.351 | 9.31E-08 |
| At2g09992 | pseudogene of disease-resistance protein; pseudogene of disease-resistance protein                                | 1.503  | 1.75E-05 |
| At2g09994 | pseudogene of U-box domain-containing protein / armadillo/beta-catenin repeat family protein; pseudogene of       | 1.826  | 3.89E-07 |
| At2g10606 | MIR396A (microRNA396A); Encodes a microRNA that targets several GRF family members. MicroRNAs are                 | -1.504 | 1.29E-07 |
| At2g11150 | pseudogene, expressed protein (transposable element gene); pseudogene of putative replication protein A1          | -1.064 | 2.70E-05 |
| At2g11270 | citrate synthase-related                                                                                          | 1.401  | 2.06E-07 |
| At2g11280 | pseudogene, hypothetical protein                                                                                  | 1.643  | 2.81E-09 |
| At2g11810 | MGD3 (MONOGALACTOSYL DIACYLGLYCEROL SYNTHASE 3); MGD3 is the major enzyme for galac                               | -2.805 | 0.00022  |
| At2g13790 | ATSERK4 (SOMATIC EMBRYOGENESIS RECEPTOR-LIKE KINASE 4)                                                            | 2.023  | 3.18E-06 |
| At2g13820 | Bifunctional inhibitor/lipid-transfer protein/seed storage 2S albumin superfamily protein                         | -1.102 | 1.01E-05 |
| At2g13851 | unknown pseudogene; unknown pseudogene                                                                            | -1.206 | 8.55E-07 |
| At2g14270 | Cytochrome C oxidase polypeptide VIB family protein                                                               | 1.029  | 0.0173   |
| At2g14550 | pseudogene, putative pre-mRNA splicing factor, non-consensus splice donor TA at exon 5                            | 1.769  | 2.15E-08 |
| At2g14580 | ATPRB1 (basic pathogenesis-related protein 1); pathogenesis related protein, encodes a basic PR1-like protein     | -1.594 | 8.56E-06 |
| At2g14610 | ATPR1 (PATHOGENESIS-RELATED GENE 1); PR1 gene expression is induced in response to a variety of p                 | -2.447 | 0.00491  |
| At2g14750 | AKN1 (APS KINASE 1); Encodes adenosine-5'-phosphosulfate kinase. Provides activated sulfate for sulfatior         | -1.303 | 6.47E-06 |
| At2g14890 | AGP9 (arabinogalactan protein 9); putative proline-rich protein (At2g14890) mRNA, complete                        | -1.058 | 4.27E-05 |
| At2g15020 | unknown protein                                                                                                   | 2.745  | 1.04E-06 |
| At2g15040 | AtRLP18 (receptor like protein 18)                                                                                | -1.129 | 0.00025  |
| At2g15050 | LTP (lipid transfer protein); Predicted to encode a PR (pathogenesis-related) protein. Belongs to the lipid tran  | -1.103 | 1.57E-06 |
| At2g15080 | AtRLP19 (receptor like protein 19)                                                                                | -1.471 | 2.42E-07 |
| At2g15120 | pseudogene, disease-resistance family protein / fatty acid elongase-related, similar to fatty acid elongase 1 (FA | -1.069 | 3.07E-05 |
| At2g15390 | FUT4 (fucosyltransferase 4); Predicted fucosyltransferase, based on similarity to FUT1, but not functionally re   | 1.758  | 1.39E-06 |
| At2g15480 | UGT73B5 (UDP-glucosyl transferase 73B5)                                                                           | 2.594  | 4.97E-09 |
| At2g15490 | UGT73B4 (UDP-glycosyltransferase 73B4)                                                                            | 3.972  | 9.79E-10 |
| At2g15620 | ATHNIR (ARABIDOPSIS THALIANA NITRITE REDUCTASE); Involved in the second step of nitrate assir                     | -1.527 | 3.61E-06 |
| At2g15680 | Calcium-binding EF-hand family protein                                                                            | -1.271 | 1.01E-07 |
| At2g15790 | CYP40 (CYCLOPHILIN 40); SQN encodes the Arabidopsis homolog of cyclophilin 40 (CyP40). It is specific             | 1.306  | 3.00E-05 |
| At2g15830 | unknown protein                                                                                                   | -1.249 | 5.23E-07 |
| At2g15890 | MEE14 (maternal effect embryo arrest 14)                                                                          | -2.128 | 3.35E-07 |
| At2g15970 | ATCOR413-PM1 (ARABIDOPSIS THALIANA COLD-REGULATED413 PLASMA MEMBRANE 1); encod                                    | -1.667 | 2.99E-07 |
| At2g16367 | Encodes a defensin-like (DEFL) family protein.; Encodes a defensin-like (DEFL) family protein.                    | 1.759  | 0.00293  |
| At2g16430 | PAP10 (purple acid phosphatase 10)                                                                                | -1.17  | 1.35E-06 |
| At2g16505 | Maternally expressed gene (MEG) family protein; Encodes a Maternally expressed gene (MEG) family protein          | 2.205  | 9.48E-08 |
| At2g16750 | Protein kinase protein with adenine nucleotide alpha hydrolases-like domain                                       | -1.887 | 1.09E-08 |
| At2g16900 | Arabidopsis phospholipase-like protein (PEARLI 4) family                                                          | 1.305  | 4.10E-08 |
| At2g17010 | Mechanosensitive ion channel family protein                                                                       | 2.634  | 2.32E-11 |
| At2g17120 | LYM2 (lysm domain GPI-anchored protein 2 precursor)                                                               | 1.498  | 0.0001   |
| At2g17140 | Pentatricopeptide repeat (PPR) superfamily protein                                                                | -1.029 | 1.40E-07 |
| At2g17180 | C2H2-like zinc finger protein                                                                                     | 2.071  | 1.21E-09 |
| At2g17220 | Protein kinase superfamily protein                                                                                | 1.147  | 1.23E-07 |
| At2g17330 | CYP51A1 (CYTOCHROME P450 51A1); putative obtusifoliol 14-alpha demethylase. Expressed pseudogene.                 | 2.828  | 2.38E-11 |
| At2g17430 | MLO7 (MILDEW RESISTANCE LOCUS O 7); A member of a large family of seven-transmembrane domain                      | 1.921  | 1.38E-09 |
| At2g17450 | RHA3A (RING-H2 finger A3A); Encodes a putative RING-H2 finger protein RHA3a.                                      | -1.406 | 9.73E-09 |
| At2g17480 | ATMLO8 (MILDEW RESISTANCE LOCUS O 8); A member of a large family of seven-transmembrane dom                       | 1.043  | 1.43E-06 |
| At2g17500 | Auxin efflux carrier family protein                                                                               | 1.134  | 9.10E-05 |
| At2g17705 | unknown protein                                                                                                   | 1.478  | 5.59E-08 |
| At2g17787 | unknown protein                                                                                                   | 1.186  | 0.0001   |
| At2g17880 | Chaperone DnaJ-domain superfamily protein                                                                         | -2.043 | 7.42E-08 |
| At2g17900 | SDG37 (SET domain group 37); Homology Subgroup S-ET - Protein containing an interrupted SET domain.               | 3.718  | 6.64E-12 |
| At2g17950 | WUS (WUSCHEL); Homeobox gene controlling the stem cell pool. Expressed in the stem cell organizing cent           | 1.366  | 9.31E-08 |
| At2g18130 | ATPAP11 (PURPLE ACID PHOSPHATASE 11)                                                                              | -1.559 | 3.86E-06 |
| At2g18193 | P-loop containing nucleoside triphosphate hydrolases superfamily protein                                          | 1.004  | 0.00421  |

|           |                                                                                                                |        |          |
|-----------|----------------------------------------------------------------------------------------------------------------|--------|----------|
| At2g18230 | AtPPa2 (pyrophosphorylase 2); Encodes a protein that might have inorganic pyrophosphatase activity.            | 1.289  | 1.51E-05 |
| At2g18300 | basic helix-loop-helix (bHLH) DNA-binding superfamily protein                                                  | -2.626 | 5.94E-10 |
| At2g18480 | Major facilitator superfamily protein                                                                          | -1.408 | 2.49E-06 |
| At2g18510 | emb2444 (embryo defective 2444)                                                                                | 1.667  | 1.37E-07 |
| At2g18560 | UDP-Glycosyltransferase superfamily protein                                                                    | -1.655 | 1.04E-06 |
| At2g18570 | UDP-Glycosyltransferase superfamily protein                                                                    | -1.432 | 3.27E-06 |
| At2g18650 | MEE16 (maternal effect embryo arrest 16)                                                                       | -1.04  | 6.79E-07 |
| At2g18680 | unknown protein                                                                                                | 2.14   | 5.50E-07 |
| At2g18690 | unknown protein                                                                                                | 1.268  | 0.0481   |
| At2g18780 | F-box and associated interaction domains-containing protein                                                    | 2.765  | 3.40E-11 |
| At2g18870 | VEL3 (vernalization5/VIN3-like)                                                                                | 1.107  | 7.95E-07 |
| At2g18969 | BEST Arabidopsis thaliana protein match is: sequence-specific DNA binding transcription factors                | -1.259 | 0.00027  |
| At2g18980 | Peroxidase superfamily protein                                                                                 | -1.344 | 0.00018  |
| At2g19110 | ATHMA4 (ARABIDOPSIS HEAVY METAL ATPASE 4); Encodes a protein with similarity to Zn ATPase. C                   | -1.353 | 1.89E-08 |
| At2g19270 | CONTAINS InterPro DOMAIN/s: Mitotic checkpoint protein PRCC, C-terminal (InterPro:IPR018800); Has 9:           | 1.16   | 1.96E-07 |
| At2g19310 | HSP20-like chaperones superfamily protein                                                                      | 3.697  | 3.90E-12 |
| At2g19560 | EER5 (ENHANCED ETHYLENE RESPONSE 5); encodes a protein with a PAM domain involved in ethylene                  | 1.13   | 1.22E-06 |
| At2g19580 | TET2 (tetraspanin2); Member of TETRASPANIN family                                                              | 1.56   | 1.66E-09 |
| At2g19582 | other RNA; Potential natural antisense gene, locus overlaps with AT2G19580                                     | 1.977  | 4.85E-09 |
| At2g19610 | RING/U-box superfamily protein                                                                                 | 1.567  | 1.56E-05 |
| At2g19630 | F-box and associated interaction domains-containing protein                                                    | 1.976  | 4.83E-11 |
| At2g19660 | Cysteine/Histidine-rich C1 domain family protein                                                               | -1.861 | 4.45E-08 |
| At2g19710 | Regulator of Vps4 activity in the MVB pathway protein                                                          | 1.336  | 4.36E-07 |
| At2g19800 | MIOX2 (myo-inositol oxygenase 2); Encodes a myo-inositol oxygenase family gene.                                | -1.709 | 0.00155  |
| At2g19890 | BEST Arabidopsis thaliana protein match is: Putative endonuclease or glycosyl hydrolase (TAIR:AT3G62210.       | 1.581  | 8.57E-10 |
| At2g19990 | PR-1-LIKE (pathogenesis-related protein-1-like); Encodes a PR-1-like protein homolog that is differentially ex | -1.499 | 6.21E-07 |
| At2g20150 | unknown protein                                                                                                | 1.9    | 4.22E-06 |
| At2g20208 | LCR60 (low-molecular-weight cysteine-rich 60); Encodes a member of a family of small,secreted, cysteine ricl   | 1.73   | 6.82E-07 |
| At2g20320 | DENN (AEX-3) domain-containing protein                                                                         | 1.283  | 3.28E-08 |
| At2g20440 | Ypt/Rab-GAP domain of gyp1p superfamily protein                                                                | -1.118 | 4.53E-06 |
| At2g20560 | DNAJ heat shock family protein                                                                                 | 6.642  | 1.02E-13 |
| At2g20562 | unknown protein                                                                                                | 2.82   | 1.55E-08 |
| At2g20570 | ATGLK1 (ARABIDOPSIS GOLDEN2-LIKE 1); Encodes GLK1, Golden2-like 1, one of a pair of partially red              | -1.086 | 1.82E-05 |
| At2g20610 | ALF1 (ABERRANT LATERAL ROOT FORMATION 1); Confers auxin overproduction. Mutants have an ove                    | -1.801 | 1.65E-07 |
| At2g20670 | Protein of unknown function (DUF506)                                                                           | -1.743 | 4.24E-05 |
| At2g20700 | LLG2 (LORELEI-LIKE-GPI ANCHORED PROTEIN 2)                                                                     | 2.451  | 8.30E-09 |
| At2g20720 | Pentatricopeptide repeat (PPR) superfamily protein                                                             | 3.836  | 1.20E-12 |
| At2g20825 | ULT2 (ULTRAPETALA 2)                                                                                           | 1.679  | 2.88E-09 |
| At2g20900 | DGK5 (diacylglycerol kinase 5)                                                                                 | 1.01   | 1.54E-07 |
| At2g20940 | Protein of unknown function (DUF1279)                                                                          | 1.931  | 7.22E-11 |
| At2g20950 | Arabidopsis phospholipase-like protein (PEARLI 4) family                                                       | 1.281  | 3.68E-08 |
| At2g21050 | LAX2 (like AUXIN RESISTANT 2); Encodes LAX2 (LIKE AUXIN RESISTANT), a member of the AUX1 L                     | -1.078 | 2.09E-06 |
| At2g21080 | unknown protein                                                                                                | -2.413 | 3.26E-10 |
| At2g21185 | unknown protein                                                                                                | -1.228 | 7.18E-06 |
| At2g21188 | other RNA; Unknown gene                                                                                        | -1.13  | 7.61E-05 |
| At2g21200 | SAUR-like auxin-responsive protein family                                                                      | -1.167 | 9.10E-07 |
| At2g21210 | SAUR-like auxin-responsive protein family ; Putative auxin-regulated protein whose expression is downregula    | -2.319 | 6.11E-10 |
| At2g21330 | FBA1 (fructose-bisphosphate aldolase 1)                                                                        | 1.51   | 5.68E-05 |
| At2g21380 | Kinesin motor family protein                                                                                   | -1.002 | 1.42E-07 |
| At2g21430 | Papain family cysteine protease                                                                                | -1.483 | 5.74E-08 |
| At2g21620 | RD2 (Adenine nucleotide alpha hydrolases-like superfamily protein); Encodes gene that is induced in response   | 1.334  | 2.36E-07 |
| At2g21640 | unknown protein; Encodes a protein of unknown function that is a marker for oxidative stress response.         | 1.432  | 6.35E-07 |
| At2g21650 | ATRL2 (ARABIDOPSIS RAD-LIKE 2); RSM1 is a member of a small sub-family of single MYB transcrip                 | -1.598 | 7.07E-05 |
| At2g21660 | ATGRP7 (GLYCINE RICH PROTEIN 7); Encodes a small glycine-rich RNA binding protein that is part of a            | -1.59  | 0.0039   |
| At2g21820 | unknown protein                                                                                                | 1.709  | 0.0292   |
| At2g21880 | ATRAB7A (RAB GTPase homolog 7A)                                                                                | 2.303  | 4.14E-08 |
| At2g21940 | SK1 (shikimate kinase 1)                                                                                       | 3.549  | 2.86E-11 |
| At2g22090 | UBA1A (RNA-binding (RRM/RBD/RNP motifs) family protein); encodes a nuclear protein that binds to RNA           | 1.572  | 1.53E-08 |
| At2g22122 | unknown protein                                                                                                | -1.53  | 1.05E-06 |
| At2g22190 | Haloacid dehalogenase-like hydrolase (HAD) superfamily protein                                                 | -1.533 | 1.04E-05 |
| At2g22200 | Integrase-type DNA-binding superfamily protein; encodes a member of the DREB subfamily A-6 of ERF/AP2          | -2.03  | 3.96E-07 |
| At2g22240 | ATIPS2 (INOSITOL 3-PHOSPHATE SYNTHASE 2); ** Referred to as MIPS1 in Mitsuhashi et al 2008. Myo                | 4.514  | 4.82E-12 |
| At2g22330 | CYP79B3 (cytochrome P450, family 79, subfamily B, polypeptide 3); Encodes a cytochrome P450. Involved i        | -2.646 | 9.40E-11 |
| At2g22335 | pseudogene of cytochrome P450 family protein; pseudogene of cytochrome P450 family protein                     | -2.244 | 2.58E-09 |
| At2g22360 | DNAJ heat shock family protein                                                                                 | 1.331  | 5.69E-09 |
| At2g22450 | riboflavin biosynthesis protein, putative                                                                      | -1.593 | 8.65E-07 |
| At2g22496 | MIR779A (microRNA779A); Encodes a microRNA of unknown function. MicroRNAs are regulatory RNAs w                | 2.022  | 5.99E-07 |

|           |                                                                                                              |        |          |
|-----------|--------------------------------------------------------------------------------------------------------------|--------|----------|
| At2g22560 | Kinase interacting (KIP1-like) family protein                                                                | 1.943  | 1.49E-08 |
| At2g22795 | unknown protein                                                                                              | -1.029 | 0.0002   |
| At2g22800 | HAT9 (Homeobox-leucine zipper protein family); Encodes homeobox protein HAT9.                                | -1.371 | 7.35E-08 |
| At2g22810 | ACC4 (1-AMINOCYCLOPROPANE-1-CARBOXYLIC ACID SYNTHASE POLYPEPTIDE); key regulatory                            | -1.846 | 8.72E-07 |
| At2g22860 | ATPSK2 (phytosulfokine 2 precursor); Phytosulfokine 2 precursor, coding for a unique plant peptide growth fi | 1.574  | 7.31E-06 |
| At2g22880 | VQ motif-containing protein                                                                                  | 1.07   | 0.00279  |
| At2g22930 | UDP-Glycosyltransferase superfamily protein                                                                  | -3.489 | 4.45E-08 |
| At2g23000 | scpl10 (serine carboxypeptidase-like 10)                                                                     | 1.252  | 2.75E-05 |
| At2g23110 | Late embryogenesis abundant protein, group 6                                                                 | 3.08   | 2.80E-08 |
| At2g23130 | AGP17 (arabinogalactan protein 17); AGP17 is a lysine-rich arabinogalactan-protein (AGP) and part of a mult  | -1.017 | 0.0002   |
| At2g23140 | RING/U-box superfamily protein with ARM repeat domain                                                        | 1.124  | 2.54E-07 |
| At2g23170 | GH3.3 (Auxin-responsive GH3 family protein); encodes an IAA-amido synthase that conjugates Asp and other     | -1.536 | 7.09E-06 |
| At2g23180 | CYP96A1 (cytochrome P450, family 96, subfamily A, polypeptide 1); member of CYP96A                           | -1.41  | 1.00E-08 |
| At2g23320 | WRKY15 (WRKY DNA-binding protein 15); Encodes WRKY DNA-binding protein 15 (WRKY15).                          | 2.359  | 9.62E-10 |
| At2g23420 | NAPRT2 (nicotinate phosphoribosyltransferase 2)                                                              | 1.862  | 5.84E-09 |
| At2g23430 | KRP1 (KIP-RELATED PROTEIN 1); Encodes a cyclin-dependent kinase inhibitor protein that functions as a r      | -2.188 | 2.11E-08 |
| At2g23560 | ATMES7 (ARABIDOPSIS THALIANA METHYL ESTERASE 7); Encodes a protein shown to have carboxyl                    | -1.05  | 1.81E-05 |
| At2g23755 | unknown protein                                                                                              | -1.224 | 4.62E-08 |
| At2g23780 | RING/U-box superfamily protein                                                                               | 1.074  | 3.88E-08 |
| At2g23810 | TET8 (tetraspanin8); Member of TETRASPANIN family                                                            | 2.136  | 2.53E-06 |
| At2g23910 | NAD(P)-binding Rossmann-fold superfamily protein                                                             | -1.343 | 0.00054  |
| At2g24040 | Low temperature and salt responsive protein family                                                           | 1.522  | 2.93E-07 |
| At2g24100 | unknown protein                                                                                              | 3.886  | 1.13E-12 |
| At2g24110 | 40S ribosomal protein S11, expressed pseudogene, similar to GB:J05216                                        | 1.789  | 6.55E-08 |
| At2g24320 | alpha/beta-Hydrolases superfamily protein                                                                    | 2.362  | 5.77E-11 |
| At2g24540 | AFR (ATTENUATED FAR-RED RESPONSE)                                                                            | 1.565  | 3.45E-05 |
| At2g24600 | Ankyrin repeat family protein                                                                                | 2.032  | 1.33E-06 |
| At2g24680 | transcriptional factor B3 family protein                                                                     | 2.333  | 3.55E-10 |
| At2g24760 | non-LTR retrotransposon family (LINE), has a 4.9e-16 P-value blast match to GB:NP_038605 L1 repeat, Tf su    | 1.488  | 3.99E-09 |
| At2g24762 | AtGDU4 (glutamine dumper 4); Encodes a member of the GDU (glutamine dumper) family proteins involved         | -1.688 | 4.55E-07 |
| At2g25140 | CLPB-M (CASEIN LYTIC PROTEINASE B-M); Encodes ClpB4, which belongs to the Casein lytic proteinas             | 4.759  | 1.28E-11 |
| At2g25150 | HXXXD-type acyl-transferase family protein                                                                   | -1.04  | 0.00049  |
| At2g25200 | Plant protein of unknown function (DUF868)                                                                   | -1.739 | 8.23E-07 |
| At2g25450 | 2-oxoglutarate (2OG) and Fe(II)-dependent oxygenase superfamily protein; encodes a protein whose sequence    | -1.146 | 9.43E-06 |
| At2g25460 | CONTAINS InterPro DOMAIN/s: C2 calcium-dependent membrane targeting (InterPro:IPR000008); BEST A             | 1.241  | 0.00015  |
| At2g25470 | AtRLP21 (receptor like protein 21)                                                                           | 1.086  | 0.00504  |
| At2g25482 | LOCATED IN: endomembrane system (Protein of unknown function (DUF784)); Encodes a ECA1 gametogen             | 1.445  | 1.02E-07 |
| At2g25500 | Inosine triphosphate pyrophosphatase family protein                                                          | 2.269  | 7.46E-09 |
| At2g25735 | unknown protein                                                                                              | 1.225  | 2.02E-05 |
| At2g25780 | Protein of unknown function (DUF1677)                                                                        | -2.071 | 5.46E-07 |
| At2g25900 | ATTZF1 (A. THALIANA TANDEM ZINC FINGER PROTEIN 1); putative Cys3His zinc finger protein (ATC                 | -1.129 | 2.13E-06 |
| At2g26000 | BRIZ2 (BRAP2 RING ZnF UBP domain-containing protein 2)                                                       | 2.304  | 4.88E-09 |
| At2g26140 | ftsh4 (FTSH protease 4); encodes an FtsH protease that is localized to the mitochondrion                     | 1.811  | 5.38E-09 |
| At2g26150 | ATHSFA2 (heat shock transcription factor A2); member of Heat Stress Transcription Factor (Hsf) family. Invc  | 9.49   | 6.56E-13 |
| At2g26190 | calmodulin-binding family protein                                                                            | 1.332  | 8.48E-06 |
| At2g26250 | FDH (FIDDLEHEAD); epidermis-specific, encodes KCS10, a putative 3-ketoacyl-CoA synthase. probably inv        | -1.007 | 1.25E-06 |
| At2g26360 | Mitochondrial substrate carrier family protein                                                               | -1.428 | 7.17E-07 |
| At2g26400 | ARD (ACIREDUCTONE DIOXYGENASE); Encodes a protein predicted to belong to the acireductone dioxyg             | -1.61  | 0.02646  |
| At2g26440 | Plant invertase/pectin methylesterase inhibitor superfamily                                                  | -1.21  | 0.00023  |
| At2g26530 | AR781 (Protein of unknown function (DUF1645)); unknown function                                              | 2.286  | 4.25E-08 |
| At2g26560 | PLA IIA (PHOSPHOLIPASE A 2A); Encodes a lipid acyl hydrolase with wide substrate specificity that accur      | 1.092  | 0.0381   |
| At2g26570 | Plant protein of unknown function (DUF827); Encodes a coiled-coil protein WEB1 (weak chloroplast moveme      | 1.491  | 5.62E-08 |
| At2g26590 | RPN13 (regulatory particle non-ATPase 13)                                                                    | 1.109  | 2.84E-07 |
| At2g26640 | KCS11 (3-ketoacyl-CoA synthase 11); Encodes KCS11, a member of the 3-ketoacyl-CoA synthase family invc       | -1.143 | 1.35E-07 |
| At2g26695 | Ran BP2/NZF zinc finger-like superfamily protein                                                             | -1.776 | 1.83E-06 |
| At2g26730 | Leucine-rich repeat protein kinase family protein                                                            | -1.23  | 7.64E-08 |
| At2g26800 | Aldolase superfamily protein                                                                                 | 1.277  | 2.86E-07 |
| At2g26975 | Ctr copper transporter family                                                                                | 1.089  | 4.13E-07 |
| At2g27120 | TIL2 (TILTED 2); Encodes a protein with similarity to DNA polymerase epsilon catalytic subunit. Based on yc  | 1.936  | 1.29E-07 |
| At2g27190 | ATPAP1 (ARABIDOPSIS THALIANA PURPLE ACID PHOSPHATASE 1); secreted purple acid phosphatas                     | -1.298 | 0.0002   |
| At2g27200 | P-loop containing nucleoside triphosphate hydrolases superfamily protein                                     | 1.237  | 1.48E-08 |
| At2g27260 | Late embryogenesis abundant (LEA) hydroxyproline-rich glycoprotein family                                    | 1.054  | 4.25E-05 |
| At2g27270 | BEST Arabidopsis thaliana protein match is: Late embryogenesis abundant (LEA) hydroxyproline-rich glycop     | 3.738  | 9.75E-12 |
| At2g27280 | Coiled-coil domain-containing protein 55 (DUF2040)                                                           | 3.336  | 1.13E-08 |
| At2g27395 | pseudogene of cysteine protease-related; pseudogene of cysteine protease-related                             | 1.568  | 0.013    |
| At2g27420 | Cysteine proteinases superfamily protein                                                                     | 1.84   | 0.00169  |
| At2g27550 | ATC (centroradialis); encodes a protein similar to TFL1. overexpression leads to similar phenotype as TFL1 o | 1.204  | 0.0117   |

|           |                                                                                                                |        |          |
|-----------|----------------------------------------------------------------------------------------------------------------|--------|----------|
| At2g27570 | P-loop containing nucleoside triphosphate hydrolases superfamily protein                                       | 1.513  | 9.10E-07 |
| At2g27580 | A20/AN1-like zinc finger family protein                                                                        | 3.313  | 3.92E-11 |
| At2g27920 | SCPL51 (serine carboxypeptidase-like 51)                                                                       | -1.079 | 5.29E-06 |
| At2g28040 | Eukaryotic aspartyl protease family protein                                                                    | 2.848  | 1.20E-09 |
| At2g28056 | MIR172 (MICRORNA 172); Encodes a microRNA that targets several genes containing AP2 domains includi            | 3.783  | 3.26E-12 |
| At2g28180 | CHX8 (CATION/H+ EXCHANGER 8); member of Putative Na+/H+ antiporter family                                      | 2.067  | 3.87E-06 |
| At2g28210 | ACA2 (alpha carbonic anhydrase 2)                                                                              | 3.856  | 2.89E-07 |
| At2g28410 | unknown protein                                                                                                | -1.297 | 2.91E-06 |
| At2g28630 | KCS12 (3-ketoacyl-CoA synthase 12); Encodes KCS12, a member of the 3-ketoacyl-CoA synthase family invc         | -2.735 | 2.79E-10 |
| At2g28650 | ATEXO70H8 (exocyst subunit exo70 family protein H8); A member of EXO70 gene family, putative exocyst :         | 1.431  | 0.00012  |
| At2g28660 | Chloroplast-targeted copper chaperone protein                                                                  | -1.389 | 1.65E-08 |
| At2g28710 | C2H2-type zinc finger family protein                                                                           | 1.074  | 2.66E-05 |
| At2g28720 | Histone superfamily protein                                                                                    | -1.202 | 6.18E-07 |
| At2g28740 | HIS4 (histone H4); histone 4                                                                                   | -1.18  | 3.71E-06 |
| At2g28810 | Dof-type zinc finger DNA-binding family protein                                                                | -1.299 | 9.61E-08 |
| At2g28870 | unknown protein                                                                                                | -1.796 | 1.67E-08 |
| At2g28900 | ATOEP16-1 (outer plastid envelope protein 16-1); Encodes AtOEP16, a 16-KDa plastid outer membrane prote        | -1.53  | 9.03E-07 |
| At2g28930 | APK1B (protein kinase 1B)                                                                                      | -1.103 | 1.59E-05 |
| At2g28950 | ATEXP6 (ARABIDOPSIS THALIANA TEXPANSIN 6); Encodes an expansin. Naming convention from the l                   | -1.157 | 3.64E-06 |
| At2g29045 | LCR62 (low-molecular-weight cysteine-rich 62); Encodes a member of a family of small,secreted, cysteine ricl   | -1.36  | 0.0156   |
| At2g29090 | CYP707A2 (cytochrome P450, family 707, subfamily A, polypeptide 2); Encodes a protein with ABA 8'-hydr         | -1.655 | 6.13E-07 |
| At2g29170 | NAD(P)-binding Rossmann-fold superfamily protein                                                               | -1.342 | 1.02E-05 |
| At2g29280 | pseudogene, tropinone reductase, blastp match of 46% identity and 2.4e-09 P-value to SP P50165 TRNH_DA'        | -2.111 | 1.34E-06 |
| At2g29300 | NAD(P)-binding Rossmann-fold superfamily protein                                                               | -1.193 | 0.00013  |
| At2g29310 | NAD(P)-binding Rossmann-fold superfamily protein                                                               | -1.11  | 1.34E-06 |
| At2g29340 | NAD-dependent epimerase/dehydratase family protein                                                             | 1.43   | 5.44E-07 |
| At2g29420 | ATGSTU7 (glutathione S-transferase tau 7); Encodes glutathione transferase belonging to the tau class of GST   | 1.609  | 1.62E-08 |
| At2g29450 | ATGSTU1 (ARABIDOPSIS THALIANA GLUTATHIONE S-TRANSFERASE TAU 1); Encodes a member c                             | 3.033  | 9.66E-10 |
| At2g29460 | ATGSTU4 (glutathione S-transferase tau 4); Encodes glutathione transferase belonging to the tau class of GST   | 3.04   | 0.00024  |
| At2g29470 | ATGSTU3 (glutathione S-transferase tau 3); Encodes glutathione transferase belonging to the tau class of GST   | 1.729  | 0.01835  |
| At2g29480 | ATGSTU2 (glutathione S-transferase tau 2); Encodes glutathione transferase belonging to the tau class of GST   | 3.46   | 3.06E-09 |
| At2g29490 | ATGSTU1 (glutathione S-transferase TAU 1); Encodes glutathione transferase belonging to the tau class of GS    | 1.978  | 5.71E-07 |
| At2g29500 | HSP20-like chaperones superfamily protein                                                                      | 7.57   | 1.32E-11 |
| At2g29600 | Galactose oxidase/kelch repeat superfamily protein                                                             | 2.747  | 1.11E-08 |
| At2g29720 | CTF2B (FAD/NAD(P)-binding oxidoreductase family protein); Encodes CTF2B.                                       | 3.652  | 1.49E-12 |
| At2g29740 | UGT71C2 (UDP-glucosyl transferase 71C2)                                                                        | 4.32   | 6.48E-10 |
| At2g29990 | NDA2 (alternative NAD(P)H dehydrogenase 2)                                                                     | 2.61   | 8.15E-10 |
| At2g30000 | PHF5-like protein                                                                                              | 3.838  | 9.19E-13 |
| At2g30020 | Protein phosphatase 2C family protein; Encodes AP2C1. Belongs to the clade B of the PP2C-superfamily. Ac       | 1.599  | 1.31E-09 |
| At2g30140 | UDP-Glycosyltransferase superfamily protein                                                                    | 1.632  | 4.50E-07 |
| At2g30210 | LAC3 (laccase 3); putative laccase, a member of laccase family of genes (17 members in Arabidopsis).           | -1.356 | 0.03813  |
| At2g30240 | CHX13 (CATION/H+ EXCHANGER 13); Encodes a plasma membrane localized potassium transporter.                     | 1.367  | 3.37E-06 |
| At2g30250 | WRKY25 (WRKY DNA-binding protein 25); member of WRKY Transcription Factor; Group I. Located in nu              | 1.944  | 6.27E-08 |
| At2g30424 | TCL2 (TRICHOMELESS 2); In a tandem repeat with AT2g30432 (TCL1) and AT2g30420 (ETC2)                           | -1.669 | 1.59E-08 |
| At2g30480 | unknown protein                                                                                                | 2.292  | 1.84E-09 |
| At2g30550 | alpha/beta-Hydrolases superfamily protein; Encodes a lipase that hydrolyzes phosphatidylcholine, glycolipids : | 1.248  | 3.81E-07 |
| At2g30600 | BTB/POZ domain-containing protein                                                                              | -1.54  | 7.43E-06 |
| At2g30670 | NAD(P)-binding Rossmann-fold superfamily protein                                                               | -1.309 | 5.38E-05 |
| At2g30840 | 2-oxoglutarate (2OG) and Fe(II)-dependent oxygenase superfamily protein; encodes a protein whose sequence      | -1.361 | 9.22E-05 |
| At2g30860 | ATGSTF9 (glutathione S-transferase PHI 9); Encodes glutathione transferase belonging to the phi class of GS    | -1.284 | 7.69E-06 |
| At2g30930 | unknown protein                                                                                                | -1.287 | 6.43E-06 |
| At2g31090 | unknown protein                                                                                                | 1.187  | 6.05E-06 |
| At2g31200 | ADF6 (actin depolymerizing factor 6); Encodes actin depolymerizing factor 6 (ADF6).                            | 1.049  | 1.32E-06 |
| At2g31230 | ATERF15 (ethylene-responsive element binding factor 15); encodes a member of the ERF (ethylene response l      | 1.179  | 1.18E-05 |
| At2g31260 | APG9 (autophagy 9); Involved in autophagy, the process of vacuolar bulk degradation of cytoplasmic compon      | 1.097  | 9.43E-06 |
| At2g31290 | Ubiquitin carboxyl-terminal hydrolase family protein                                                           | -1.015 | 6.79E-07 |
| At2g31380 | STH (salt tolerance homologue); a B-box zinc finger protein that interacts with COP1. contains a novel 11 ami  | 1.194  | 6.41E-07 |
| At2g31425 | Plant invertase/pectin methylesterase inhibitor superfamily protein                                            | 1.176  | 7.19E-06 |
| At2g31750 | UGT74D1 (UDP-glucosyl transferase 74D1)                                                                        | 1.291  | 2.54E-07 |
| At2g31790 | UDP-Glycosyltransferase superfamily protein                                                                    | -1.601 | 1.07E-09 |
| At2g31860 | pseudogene, poly (ADP-ribose) glycohydrolase, putative, contains Pfam domain, PF05028: poly (ADP-ribose)       | 1.603  | 1.58E-07 |
| At2g31865 | PARG2 (poly(ADP-ribose) glycohydrolase 2)                                                                      | 2.26   | 7.15E-06 |
| At2g31880 | EVR (EVERSHED); Encodes a putative leucine rich repeat transmembrane protein that is expressed in respon       | 1.452  | 2.93E-05 |
| At2g31900 | ATMYO5 (MYOSIN 5); Encodes an novel myosin isoform.                                                            | -1.179 | 2.14E-07 |
| At2g31920 | Plant protein of unknown function (DUF936)                                                                     | 1.148  | 2.87E-06 |
| At2g31945 | unknown protein                                                                                                | 3.248  | 2.22E-08 |
| At2g31955 | CNX2 (cofactor of nitrate reductase and xanthine dehydrogenase 2); COFACTOR OF NITRATE REDUCTAS                | 1.271  | 0.0006   |

|           |                                                                                                                |        |          |
|-----------|----------------------------------------------------------------------------------------------------------------|--------|----------|
| At2g31990 | Exostosin family protein                                                                                       | 1.292  | 9.66E-07 |
| At2g32020 | Acyl-CoA N-acyltransferases (NAT) superfamily protein                                                          | 2.314  | 5.77E-09 |
| At2g32030 | Acyl-CoA N-acyltransferases (NAT) superfamily protein                                                          | 3.679  | 2.99E-10 |
| At2g32050 | Family of unknown function (DUF572)                                                                            | 2.301  | 4.05E-07 |
| At2g32100 | ATOFP16 (RABIDOPSIS THALIANA OVATE FAMILY PROTEIN 16)                                                          | -1.933 | 4.81E-06 |
| At2g32120 | HSP70T-2 (heat-shock protein 70T-2)                                                                            | 7.364  | 5.43E-13 |
| At2g32130 | Plant protein of unknown function (DUF641)                                                                     | 4.156  | 9.19E-09 |
| At2g32140 | transmembrane receptors                                                                                        | 3.895  | 1.92E-09 |
| At2g32190 | unknown protein                                                                                                | 2.197  | 2.35E-05 |
| At2g32200 | unknown protein                                                                                                | 2.206  | 1.26E-05 |
| At2g32210 | unknown protein                                                                                                | 2.64   | 7.79E-06 |
| At2g32290 | BAM6 (beta-amylase 6)                                                                                          | 1.593  | 6.35E-06 |
| At2g32550 | Cell differentiation, Rcd1-like protein                                                                        | 1.028  | 0.0002   |
| At2g32660 | AtRLP22 (receptor like protein 22)                                                                             | -2.067 | 0.00012  |
| At2g32970 | unknown protein                                                                                                | -1.005 | 9.55E-08 |
| At2g33100 | ATCSLD1 (cellulose synthase-like D1); encodes a gene similar to cellulose synthase                             | 4.89   | 3.40E-11 |
| At2g33110 | ATVAMP723 (vesicle-associated membrane protein 723); member of VAMP72 Gene Family                              | 1.742  | 3.85E-08 |
| At2g33170 | Leucine-rich repeat receptor-like protein kinase family protein                                                | -1.251 | 3.90E-06 |
| At2g33240 | ATXID (MYOSIN XI D); member of Myosin-like proteins                                                            | 1.17   | 1.56E-06 |
| At2g33380 | CLO-3 (CALEOSIN 3); Encodes a calcium binding protein whose mRNA is induced upon treatment with NaCl           | 3.159  | 1.59E-08 |
| At2g33460 | RIC1 (ROP-interactive CRIB motif-containing protein 1); encodes a member of a novel protein family that cor    | 2.23   | 3.79E-10 |
| At2g33490 | hydroxyproline-rich glycoprotein family protein                                                                | 1.013  | 4.40E-06 |
| At2g33580 | Protein kinase superfamily protein                                                                             | 1.668  | 1.40E-05 |
| At2g33585 | unknown protein                                                                                                | 1.229  | 1.54E-07 |
| At2g33590 | NAD(P)-binding Rossmann-fold superfamily protein                                                               | 4.047  | 7.08E-11 |
| At2g33670 | ATMLO5 (MILDEW RESISTANCE LOCUS O 5); A member of a large family of seven-transmembrane dom                    | 1.68   | 6.30E-06 |
| At2g33700 | Protein phosphatase 2C family protein                                                                          | 2.521  | 6.81E-12 |
| At2g33750 | ATPUP2 (purine permease 2); Member of a family of proteins related to PUP1, a purine transporter. May be ir    | -1.496 | 2.26E-07 |
| At2g33830 | Dormancy/auxin associated family protein                                                                       | -3.229 | 5.58E-06 |
| At2g33850 | unknown protein                                                                                                | -1.084 | 0.00096  |
| At2g34010 | unknown protein                                                                                                | -2.125 | 1.66E-07 |
| At2g34020 | Calcium-binding EF-hand family protein                                                                         | 2.812  | 5.25E-07 |
| At2g34030 | Calcium-binding EF-hand family protein                                                                         | 4.328  | 9.38E-10 |
| At2g34040 | Apoptosis inhibitory protein 5 (API5)                                                                          | 1.362  | 1.87E-06 |
| At2g34210 | Transcription elongation factor Spt5                                                                           | -1.52  | 0.0181   |
| At2g34260 | transducin family protein / WD-40 repeat family protein                                                        | 1.095  | 3.72E-06 |
| At2g34355 | Major facilitator superfamily protein                                                                          | 1.695  | 1.37E-08 |
| At2g34360 | MATE efflux family protein                                                                                     | 2.166  | 6.88E-10 |
| At2g34430 | LHB1B1 (light-harvesting chlorophyll-protein complex II subunit B1); Photosystem II type I chlorophyll         | -1.526 | 0.0058   |
| At2g34460 | NAD(P)-binding Rossmann-fold superfamily protein                                                               | 1.36   | 1.11E-07 |
| At2g34490 | CYP710A2 (cytochrome P450, family 710, subfamily A, polypeptide 2); Encodes a protein with C22-sterol de       | -1.181 | 4.90E-06 |
| At2g34580 | CONTAINS InterPro DOMAIN/s: Herpesvirus UL139, cytomegalovirus (InterPro:IPR021042); Has 30201 Bl              | 3.248  | 6.78E-10 |
| At2g34590 | Transketolase family protein                                                                                   | 1.21   | 2.15E-07 |
| At2g34660 | ATMRP2 (multidrug resistance-associated protein 2); encodes a multidrug resistance-associated protein that is  | 2.287  | 2.06E-09 |
| At2g34770 | ATFAH1 (ARABIDOPSIS FATTY ACID HYDROXYLASE 1); encodes a fatty acid hydroxylase, required for                  | 1.156  | 1.93E-05 |
| At2g34930 | disease resistance family protein / LRR family protein                                                         | -1.034 | 0.00099  |
| At2g35035 | URED (urease accessory protein D); Encodes a urease accessory protein which is essential for the activation of | 2.562  | 6.89E-10 |
| At2g35075 | unknown protein                                                                                                | -1.065 | 1.75E-05 |
| At2g35290 | unknown protein                                                                                                | -1.126 | 1.96E-05 |
| At2g35570 | pseudogene, serpin (serine protease inhibitor) family, similar to phloem serpin-1 (Cucurbita maxima) GI:9937.  | 1.639  | 0.0001   |
| At2g35658 | unknown protein                                                                                                | 3.196  | 8.75E-09 |
| At2g35660 | CTF2A (FAD/NAD(P)-binding oxidoreductase family protein); Encodes a member of a novel gene family with         | 1.137  | 0.0004   |
| At2g35740 | ATINT3 (NOSITOL TRANSPORTER 3)                                                                                 | 2.452  | 5.88E-08 |
| At2g35890 | CPK25 (calcium-dependent protein kinase 25); member of Calcium Dependent Protein Kinase                        | 1.179  | 0.01749  |
| At2g35930 | PUB23 (plant U-box 23); Encodes a cytoplasmically localized U-box domain containing E3 ubiquitin ligase th     | 2.358  | 2.44E-10 |
| At2g36050 | ATOFP15 (ARABIDOPSIS THALIANA OVATE FAMILY PROTEIN 15)                                                         | -1.26  | 5.30E-06 |
| At2g36053 | unknown protein                                                                                                | -1.079 | 2.78E-06 |
| At2g36110 | Polynucleotidyl transferase, ribonuclease H-like superfamily protein                                           | -1.003 | 1.26E-06 |
| At2g36120 | DOT1 (DEFECTIVELY ORGANIZED TRIBUTARIES 1); Encodes a glycine rich protein that is involved in l               | -1.09  | 0.0003   |
| At2g36220 | unknown protein                                                                                                | 2.068  | 2.51E-07 |
| At2g36390 | BE3 (BRANCHING ENZYME 3); Encodes a starch branching enzyme (EC.2.4.1.18) similar to SBE2 from m               | -1.14  | 2.00E-07 |
| At2g36410 | Family of unknown function (DUF662)                                                                            | -1.275 | 1.85E-06 |
| At2g36430 | Plant protein of unknown function (DUF247)                                                                     | -1.147 | 2.40E-05 |
| At2g36460 | Aldolase superfamily protein                                                                                   | 1.207  | 3.06E-06 |
| At2g36470 | Plant protein of unknown function (DUF868)                                                                     | -1.031 | 8.30E-06 |
| At2g36630 | Sulfite exporter TauE/SafE family protein                                                                      | -1.609 | 4.42E-07 |
| At2g36695 | unknown protein                                                                                                | 1.266  | 8.24E-05 |

|           |                                                                                                               |        |          |
|-----------|---------------------------------------------------------------------------------------------------------------|--------|----------|
| At2g36750 | UGT73C1 (UDP-glucosyl transferase 73C1)                                                                       | 2.494  | 7.95E-07 |
| At2g36770 | UDP-Glycosyltransferase superfamily protein                                                                   | 1.218  | 1.22E-06 |
| At2g36780 | UDP-Glycosyltransferase superfamily protein                                                                   | 1.306  | 6.14E-05 |
| At2g36790 | UGT73C6 (UDP-glucosyl transferase 73C6); The At2g36790 gene encodes a UDP-glucose:flavonol-3-O-glycc          | 2.145  | 1.19E-06 |
| At2g36800 | DOGT1 (don-glucosyltransferase 1); Encodes a DON-Glucosyltransferase. The UGT73C5 glucosylates both b         | 1.421  | 6.04E-06 |
| At2g36881 | unknown protein                                                                                               | -1.161 | 0.00051  |
| At2g36895 | unknown protein                                                                                               | 1.433  | 5.23E-06 |
| At2g36950 | Heavy metal transport/detoxification superfamily protein                                                      | 1.973  | 2.19E-08 |
| At2g37030 | SAUR-like auxin-responsive protein family                                                                     | -1.151 | 0.01451  |
| At2g37110 | PLAC8 family protein                                                                                          | 1.222  | 2.91E-07 |
| At2g37130 | Peroxidase superfamily protein                                                                                | -2.067 | 1.11E-06 |
| At2g37180 | PIP2.3 (PLASMA MEMBRANE INTRINSIC PROTEIN 2.3); a member of the plasma membrane intrinsic pro                 | 2.255  | 3.47E-08 |
| At2g37240 | Thioredoxin superfamily protein                                                                               | 1.492  | 3.64E-07 |
| At2g37280 | ATPDR5 (PLEIOTROPIC DRUG RESISTANCE 5)                                                                        | -1.249 | 8.13E-06 |
| At2g37310 | Pentatricopeptide repeat (PPR) superfamily protein                                                            | -1.05  | 1.82E-05 |
| At2g37330 | ALS3 (ALUMINUM SENSITIVE 3); Encodes an ABC transporter-like protein, without an ATPase domain, re            | -1.058 | 8.47E-06 |
| At2g37380 | unknown protein                                                                                               | -1.154 | 1.96E-07 |
| At2g37430 | C2H2 and C2HC zinc fingers superfamily protein                                                                | 4.289  | 2.23E-10 |
| At2g37460 | nodulin MtN21 /EamA-like transporter family protein                                                           | -1.338 | 1.19E-06 |
| At2g37530 | unknown protein                                                                                               | -1.192 | 3.86E-07 |
| At2g37540 | NAD(P)-binding Rossmann-fold superfamily protein                                                              | 1.488  | 1.24E-07 |
| At2g37640 | ATEXP3 (EXPANSIN 3); member of Alpha-Expansin Gene Family. Naming convention from the Expansin W              | -1.679 | 5.09E-07 |
| At2g37740 | ATZFP10 (ZINC-FINGER PROTEIN 10)                                                                              | -1.212 | 0.00478  |
| At2g37760 | NAD(P)-linked oxidoreductase superfamily protein                                                              | 1.513  | 1.83E-06 |
| At2g37770 | NAD(P)-linked oxidoreductase superfamily protein                                                              | 1.338  | 0.00011  |
| At2g37940 | AtIPCS2 (Arabidopsis Inositol phosphorylceramide synthase 2); I                                               | 1.274  | 7.93E-06 |
| At2g37950 | RING/FYVE/PHD zinc finger superfamily protein                                                                 | -1.554 | 2.28E-05 |
| At2g37970 | SOUL-1 (SOUL heme-binding family protein)                                                                     | 3.787  | 8.53E-11 |
| At2g37980 | O-fucosyltransferase family protein                                                                           | 1.052  | 9.10E-06 |
| At2g38120 | AUX1 (AUXIN RESISTANT 1); Encodes an auxin influx transporter. AUX1 resides at the apical plasma mer          | -1.538 | 1.05E-08 |
| At2g38170 | CAX1 (cation exchanger 1); Encodes a high affinity vacuolar calcium antiporter. The residue His 338 is critic | -1.131 | 9.22E-06 |
| At2g38195 | RING/U-box superfamily protein                                                                                | 1.084  | 1.99E-06 |
| At2g38230 | ATPDX1.1 (ARABIDOPSIS THALIANA PYRIDOXINE BIOSYNTHESIS 1.1); Encodes a protein predicted                      | 1.565  | 5.19E-07 |
| At2g38250 | Homeodomain-like superfamily protein                                                                          | 2.853  | 7.83E-09 |
| At2g38255 | Protein of Unknown Function (DUF239)                                                                          | 3.182  | 3.65E-10 |
| At2g38290 | AMT2 (ammonium transporter 2); encodes a high-affinity ammonium transporter, which is expressed in shoot      | 1.029  | 2.38E-06 |
| At2g38300 | myb-like HTH transcriptional regulator family protein                                                         | -2.469 | 2.48E-08 |
| At2g38340 | Integrase-type DNA-binding superfamily protein; encodes a member of the DREB subfamily A-2 of ERF/AP2         | 6.293  | 1.29E-10 |
| At2g38350 | unknown protein                                                                                               | 1.127  | 0.0004   |
| At2g38360 | PRA1.B4 (prenylated RAB acceptor 1.B4)                                                                        | 1.108  | 1.85E-06 |
| At2g38470 | ATWRKY33 (WRKY DNA-BINDING PROTEIN 33); Member of the plant WRKY transcription factor family                  | 3.266  | 6.41E-09 |
| At2g38500 | 2-oxoglutarate (2OG) and Fe(II)-dependent oxygenase superfamily protein                                       | 1.368  | 1.58E-08 |
| At2g38520 | copla-like retrotransposon family, has a 8.4e-60 P-value blast match to dbj BAA78427.1  polyprotein (AtRE2-2  | 2.034  | 2.20E-06 |
| At2g38560 | TFIIS (transcript elongation factor IIS); Encodes RNA polymerase II transcript elongation factor TFIIS. Comp  | 1.066  | 5.14E-07 |
| At2g38830 | Ubiquitin-conjugating enzyme/RWD-like protein                                                                 | 1.916  | 9.54E-09 |
| At2g38940 | ATPT2 (ARABIDOPSIS THALIANA PHOSPHATE TRANSPORTER 2); Encodes Pht1;4, a member of the P                       | -2.086 | 0.0005   |
| At2g39010 | PIP2.6 (PLASMA MEMBRANE INTRINSIC PROTEIN 2.6)                                                                | -1.061 | 0.0002   |
| At2g39050 | hydroxyproline-rich glycoprotein family protein                                                               | 1.363  | 8.38E-06 |
| At2g39420 | alpha/beta-Hydrolases superfamily protein                                                                     | 1.461  | 3.48E-07 |
| At2g39510 | nodulin MtN21 /EamA-like transporter family protein                                                           | -1.423 | 0.0003   |
| At2g39650 | Protein of unknown function (DUF506)                                                                          | 3.059  | 7.58E-09 |
| At2g39730 | RCA (rubisco activase); Rubisco activase, a nuclear-encoded chloroplast protein that consists of two isoforms | 1.095  | 0.0002   |
| At2g39782 | unknown protein                                                                                               | -1.124 | 4.62E-05 |
| At2g39850 | Subtilisin-like serine endopeptidase family protein                                                           | -1.087 | 0.0005   |
| At2g39900 | GATA type zinc finger transcription factor family protein                                                     | -1.008 | 1.55E-05 |
| At2g39920 | HAD superfamily, subfamily IIIB acid phosphatase                                                              | -2.372 | 5.39E-08 |
| At2g40000 | ATHSPRO2 (ARABIDOPSIS ORTHOLOG OF SUGAR BEET HS1 PRO-1 2)                                                     | 1.54   | 8.10E-05 |
| At2g40080 | ELF4 (EARLY FLOWERING 4); Encodes a novel nuclear 111 amino-acid phytochrome-regulated component              | -2.129 | 6.00E-08 |
| At2g40090 | ATATH9 (ABC2 homolog 9); member of ATH subfamily                                                              | 1.835  | 3.19E-08 |
| At2g40095 | Alpha/beta hydrolase related protein                                                                          | 1.932  | 6.16E-08 |
| At2g40100 | LHCB4.3 (light harvesting complex photosystem II); Lhcb4:3 protein (Lhcb4.3, light harvesting complex of pl   | 1.416  | 2.33E-06 |
| At2g40113 | Pollen Ole e 1 allergen and extensin family protein                                                           | 1.195  | 9.63E-05 |
| At2g40130 | Double Clp-N motif-containing P-loop nucleoside triphosphate hydrolases superfamily protein                   | -1.663 | 7.88E-07 |
| At2g40180 | ATHPP2C5 (phosphatase 2C5); Encodes PP2C5, a member of the PP2C family phosphatases. PP2C5 acts as ;          | 2.488  | 1.96E-07 |
| At2g40200 | basic helix-loop-helix (bHLH) DNA-binding superfamily protein                                                 | 2.491  | 9.84E-08 |
| At2g40260 | Homeodomain-like superfamily protein                                                                          | -1.431 | 1.66E-06 |
| At2g40330 | PYL6 (PYR1-like 6); Encodes a member of the PYR (pyrabactin resistance )/PYL(PYR1-like)/RCAR (regulat         | -1.081 | 5.14E-05 |

|           |                                                                                                                |        |          |
|-----------|----------------------------------------------------------------------------------------------------------------|--------|----------|
| At2g40340 | DREB2C (Integrase-type DNA-binding superfamily protein); Encodes a member of the DREB subfamily A-2            | 2.69   | 6.38E-09 |
| At2g40350 | Integrase-type DNA-binding superfamily protein; encodes a member of the DREB subfamily A-2 of ERF/AP2          | 1.537  | 0.00023  |
| At2g40530 | unknown protein                                                                                                | -1.812 | 4.38E-06 |
| At2g40610 | ATEXPA8 (expansin A8); member of Alpha-Expansin Gene Family. Naming convention from the Expansin V             | -2.538 | 6.47E-06 |
| At2g40670 | ARR16 (response regulator 16); response regulator 16                                                           | -2.101 | 2.01E-08 |
| At2g40730 | Protein kinase family protein with ARM repeat domain                                                           | 1.017  | 0.0041   |
| At2g40740 | ATWRKY55 (WRKY DNA-BINDING PROTEIN 55); member of WRKY Transcription Factor; Group III                         | 1.021  | 0.00382  |
| At2g40750 | ATWRKY54 (WRKY DNA-BINDING PROTEIN 54); member of WRKY Transcription Factor; Group III                         | -1.623 | 0.00016  |
| At2g40830 | RHC1A (RING-H2 finger C1A); Encodes a putative RING-H2 finger protein RHC1a.                                   | 1.009  | 1.85E-05 |
| At2g40850 | ATPI4K GAMMA 1 (phosphoinositide 4-kinase gamma 1)                                                             | 2.329  | 3.08E-10 |
| At2g40860 | protein kinase family protein / protein phosphatase 2C ( PP2C) family protein                                  | 1.279  | 1.28E-06 |
| At2g40900 | nodulin MtN21 /EamA-like transporter family protein                                                            | -1.708 | 3.36E-06 |
| At2g40940 | ERS (ETHYLENE RESPONSE SENSOR); Ethylene receptor, subfamily 1. Has histidine kinase activity.                 | -1.07  | 1.88E-07 |
| At2g41010 | ATCAMBP25 (calmodulin (CAM)-binding protein of 25 kDa); Encodes a novel calmodulin binding protein w           | 2.158  | 2.95E-08 |
| At2g41070 | EEL (ENHANCED EM LEVEL); Transcription factor homologous to ABI5. Regulates AtEm1 expression by t              | 1.389  | 2.65E-07 |
| At2g41100 | ATCAL4 (ARABIDOPSIS THALIANA CALMODULIN LIKE 4); encodes a calmodulin-like protein, with six                   | 2.895  | 3.37E-09 |
| At2g41110 | CAM2 (calmodulin 2); Encodes a touch-inducible calmodulin that has higher affinity to kinesin-like calmoduli   | 2.021  | 3.44E-10 |
| At2g41120 | unknown protein                                                                                                | 2.353  | 8.77E-09 |
| At2g41160 | Ubiquitin-associated (UBA) protein                                                                             | 2.771  | 1.36E-11 |
| At2g41190 | Transmembrane amino acid transporter family protein                                                            | 1.198  | 6.86E-08 |
| At2g41240 | BHLH100 (basic helix-loop-helix protein 100); Encodes a member of the basic helix-loop-helix transcription f   | 2.086  | 0.00354  |
| At2g41250 | Haloacid dehalogenase-like hydrolase (HAD) superfamily protein                                                 | 1.474  | 4.22E-06 |
| At2g41280 | M10; Encodes a hydrophilic protein similar to Late Embryogenesis Activated (LEA) proteins expressed during     | 1.304  | 4.48E-07 |
| At2g41342 | unknown protein                                                                                                | 1.308  | 5.15E-06 |
| At2g41440 | unknown protein                                                                                                | 1.018  | 1.17E-06 |
| At2g41480 | Peroxidase superfamily protein                                                                                 | -1.274 | 0.00141  |
| At2g41510 | ATCKX1 (CYTOKININ OXIDASE/DEHYDROGENASE 1); It encodes a protein whose sequence is similar t                   | -1.057 | 0.0018   |
| At2g41540 | GPDHC1 (6-phosphogluconate dehydrogenase family protein); Encodes a protein with NAD-dependent glycer          | -1.035 | 2.31E-06 |
| At2g41560 | ACA4 (autoinhibited Ca(2+)-ATPase, isoform 4); encodes a calmodulin-regulated Ca(2+)-ATPase that improv        | -1.733 | 1.95E-08 |
| At2g41630 | TFIIB (transcription factor IIB); Encodes the transcription factor TFIIB.                                      | 1.485  | 1.03E-07 |
| At2g41640 | Glycosyltransferase family 61 protein                                                                          | 1.645  | 5.02E-05 |
| At2g41730 | unknown protein                                                                                                | 2.684  | 1.23E-06 |
| At2g41835 | zinc finger (C2H2 type, AN1-like) family protein                                                               | 3.419  | 1.27E-11 |
| At2g41880 | GK-1 (guanylate kinase 1); Guanylate kinase. Involved in nucleotide metabolism.                                | 1.054  | 3.88E-06 |
| At2g41905 | BEST Arabidopsis thaliana protein match is: arabinogalactan protein 23 (TAIR:AT3G57690.1)                      | 1.203  | 2.67E-06 |
| At2g41940 | ZFP8 (zinc finger protein 8); Encodes a zinc finger protein containing only a single zinc finger.              | -1.366 | 1.11E-07 |
| At2g42005 | Transmembrane amino acid transporter family protein                                                            | 1.131  | 2.95E-06 |
| At2g42150 | DNA-binding bromodomain-containing protein                                                                     | 3.045  | 8.80E-11 |
| At2g42170 | Actin family protein                                                                                           | -1.361 | 2.76E-06 |
| At2g42320 | nucleolar protein gar2-related                                                                                 | -1.13  | 7.36E-07 |
| At2g42330 | GC-rich sequence DNA-binding factor-like protein with Tufelin interacting domain                               | 1.059  | 1.88E-05 |
| At2g42350 | RING/U-box superfamily protein                                                                                 | 1.177  | 2.35E-06 |
| At2g42380 | BZIP34 (Basic-leucine zipper (bZIP) transcription factor family protein); Encodes a member of the BZIP famil   | -1.305 | 8.29E-06 |
| At2g42388 | other RNA; Unknown gene                                                                                        | -1.234 | 9.14E-06 |
| At2g42480 | TRAF-like family protein                                                                                       | 2.302  | 6.39E-11 |
| At2g42530 | COR15B (cold regulated 15b)                                                                                    | -2.693 | 6.06E-08 |
| At2g42760 | unknown protein                                                                                                | -1.003 | 6.05E-06 |
| At2g42870 | HLH1 (HELIX-LOOP-HELIX 1); Encodes PHYTOCHROME RAPIDLY REGULATED1 (PAR1), an atypical                          | -1.988 | 7.51E-07 |
| At2g42900 | Plant basic secretory protein (BSP) family protein                                                             | -1.989 | 6.23E-08 |
| At2g42950 | Magnesium transporter CorA-like family protein                                                                 | 1.883  | 6.06E-09 |
| At2g42975 | unknown protein                                                                                                | 1.212  | 5.36E-05 |
| At2g42990 | GDSL-like Lipase/Acylhydrolase superfamily protein                                                             | -1.34  | 9.43E-06 |
| At2g43000 | anac042 (NAC domain containing protein 42)                                                                     | 1.129  | 0.00877  |
| At2g43010 | PIF4 (phytochrome interacting factor 4); Isolated as a semidominant mutation defective in red -light responses | -1.74  | 3.17E-07 |
| At2g43060 | IBH1 (ILI1 binding bHLH 1)                                                                                     | -1.142 | 1.18E-06 |
| At2g43100 | IPMI2 (isopropylmalate isomerase 2)                                                                            | -2.114 | 1.03E-08 |
| At2g43120 | RmlC-like cupins superfamily protein                                                                           | 2.457  | 1.74E-07 |
| At2g43160 | ENTH/VHS family protein                                                                                        | 1.28   | 6.29E-07 |
| At2g43320 | S-adenosyl-L-methionine-dependent methyltransferases superfamily protein                                       | 1.546  | 8.10E-07 |
| At2g43445 | F-box and associated interaction domains-containing protein                                                    | -1.508 | 8.73E-08 |
| At2g43500 | Plant regulator RWP-RK family protein                                                                          | 2.918  | 1.03E-10 |
| At2g43530 | Scorpion toxin-like knottin superfamily protein; Encodes a defensin-like (DEFL) family protein.                | -1.068 | 6.96E-07 |
| At2g43535 | Scorpion toxin-like knottin superfamily protein; Encodes a defensin-like (DEFL) family protein.                | -1.115 | 0.01549  |
| At2g43550 | Scorpion toxin-like knottin superfamily protein; Encodes a defensin-like (DEFL) family protein.                | -2.079 | 3.14E-09 |
| At2g43570 | CHI (chitinase, putative)                                                                                      | -1.394 | 0.0251   |
| At2g43590 | Chitinase family protein                                                                                       | -1.217 | 0.005    |
| At2g43600 | Chitinase family protein                                                                                       | -1.106 | 0.00017  |



|           |                                                                                                              |        |          |
|-----------|--------------------------------------------------------------------------------------------------------------|--------|----------|
| At2g43620 | Chitinase family protein                                                                                     | -1.083 | 0.02405  |
| At2g43630 | FUNCTIONS IN: molecular_function unknown; INVOLVED IN: biological_process unknown; LOCATED IN                | 1.236  | 6.85E-08 |
| At2g43880 | Pectin lyase-like superfamily protein                                                                        | -1.212 | 8.71E-05 |
| At2g43900 | Endonuclease/exonuclease/phosphatase family protein                                                          | 1.782  | 1.03E-08 |
| At2g44170 | ATNMT2 (ARABIDOPSIS N-MYRISTOYLTRANSFERASE 2)                                                                | 2.455  | 4.81E-09 |
| At2g44195 | CBF1-interacting co-repressor CIR, N-terminal                                                                | 1.357  | 3.18E-05 |
| At2g44230 | Plant protein of unknown function (DUF946)                                                                   | -1.333 | 3.30E-06 |
| At2g44460 | BGLU28 (beta glucosidase 28)                                                                                 | 5.374  | 1.27E-09 |
| At2g44570 | AtGH9B12 (glycosyl hydrolase 9B12)                                                                           | -1.134 | 0.00031  |
| At2g44600 | unknown protein                                                                                              | 1.349  | 1.55E-06 |
| At2g44740 | CYCP4.1 (cyclin p4.1)                                                                                        | -1.811 | 4.25E-08 |
| At2g44840 | ATERF13 (ETHYLENE-RESPONSIVE ELEMENT BINDING FACTOR 13); encodes a member of the ERF (                       | 1.674  | 0.00222  |
| At2g44970 | alpha/beta-Hydrolases superfamily protein                                                                    | 1.385  | 2.02E-08 |
| At2g45130 | ATSPX3 (ARABIDOPSIS THALIANA SPX DOMAIN GENE 3)                                                              | -2.065 | 0.00456  |
| At2g45135 | RING/U-box superfamily protein                                                                               | -1.22  | 0.02647  |
| At2g45180 | Bifunctional inhibitor/lipid-transfer protein/seed storage 2S albumin superfamily protein                    | -1.542 | 5.71E-08 |
| At2g45450 | ZPR1 (LITTLE ZIPPER 1); ZPR1, a small leucine zipper-containing protein that interacts with REV HD-ZIPII     | -1.329 | 6.05E-09 |
| At2g45500 | AAA-type ATPase family protein                                                                               | 1.001  | 0.0495   |
| At2g45720 | ARM repeat superfamily protein                                                                               | -1.001 | 0.0002   |
| At2g45840 | Arabidopsis thaliana protein of unknown function (DUF821)                                                    | 2.289  | 1.93E-09 |
| At2g46230 | PIN domain-like family protein                                                                               | 1.376  | 2.95E-09 |
| At2g46240 | ATBAG6 (ARABIDOPSIS THALIANA BCL-2-ASSOCIATED ATHANOGENE 6); A member of Arabidopsi                          | 5.307  | 3.40E-11 |
| At2g46320 | Mitochondrial substrate carrier family protein                                                               | 1.082  | 2.74E-07 |
| At2g46340 | SPA1 (SUPPRESSOR OF PHYA-105 1); Encodes a member of the SPA (suppressor of phyA-105) protein fan            | 1.053  | 2.12E-06 |
| At2g46400 | ATWRKY46 (WRKY DNA-BINDING PROTEIN 46); member of WRKY Transcription Factor; Group III                       | 3.413  | 2.07E-06 |
| At2g46530 | ARF11 (auxin response factor 11)                                                                             | -1.118 | 9.43E-06 |
| At2g46570 | LAC6 (laccase 6); putative laccase, a member of laccase family of genes (with 17 members in Arabidopsis).    | -1.076 | 1.45E-05 |
| At2g46640 | unknown protein                                                                                              | -1.641 | 1.22E-07 |
| At2g46650 | ATCB5-C (ARABIDOPSIS CYTOCHROME B5 ISOFORM C); member of Cytochromes b5                                      | -2.649 | 3.69E-10 |
| At2g46670 | CCT motif family protein                                                                                     | 1.972  | 7.46E-08 |
| At2g46690 | SAUR-like auxin-responsive protein family                                                                    | -1.832 | 1.90E-08 |
| At2g46735 | unknown protein                                                                                              | 3.643  | 6.05E-10 |
| At2g46790 | APRR9 (Arabidopsis pseudo-response regulator 9); Pseudo-response regulator PRR9. Involved in clock functi    | 1.624  | 0.0016   |
| At2g46830 | CCA1 (circadian clock associated 1); Encodes a transcriptional repressor that performs overlapping functions | 4.167  | 1.81E-11 |
| At2g46870 | NGA1 (NGATHA1)                                                                                               | -1.413 | 6.86E-06 |
| At2g46880 | PAP14 (purple acid phosphatase 14)                                                                           | -2.92  | 0.0052   |
| At2g46915 | Protein of unknown function (DUF3754)                                                                        | 1.524  | 3.33E-08 |
| At2g47050 | Plant invertase/pectin methylesterase inhibitor superfamily protein                                          | 1.074  | 6.75E-05 |
| At2g47060 | Protein kinase superfamily protein                                                                           | 1.618  | 4.77E-07 |
| At2g47130 | NAD(P)-binding Rossmann-fold superfamily protein                                                             | 2.046  | 4.49E-07 |
| At2g47140 | NAD(P)-binding Rossmann-fold superfamily protein                                                             | 3.079  | 7.28E-10 |
| At2g47150 | NAD(P)-binding Rossmann-fold superfamily protein                                                             | 1.902  | 5.26E-07 |
| At2g47180 | AtGolS1 (galactinol synthase 1)                                                                              | 6.294  | 1.47E-12 |
| At2g47270 | sequence-specific DNA binding transcription factors                                                          | -1.166 | 0.007    |
| At2g47280 | Pectin lyase-like superfamily protein                                                                        | 1.831  | 2.17E-09 |
| At2g47440 | Tetratricopeptide repeat (TPR)-like superfamily protein                                                      | -1.25  | 0.00015  |
| At2g47520 | HRE2 (HYPOXIA RESPONSIVE ERF (ETHYLENE RESPONSE FACTOR) 2); encodes a member of the ER                       | 2.683  | 1.65E-05 |
| At2g47720 | FUNCTIONS IN: molecular_function unknown; INVOLVED IN: biological_process unknown; LOCATED IN                | 1.253  | 0.00016  |
| At2g47730 | ATGSTF5 (GLUTATHIONE S-TRANSFERASE (CLASS PHI) 5); Encodes glutathione transferase belonging                 | 2.172  | 0.0001   |
| At2g47770 | ATTSP0 (TSPO(outer membrane tryptophan-rich sensory protein)-related); Encodes a membrane-bound prote        | 2.582  | 0.0049   |
| At2g47800 | ATMRP4 (multidrug resistance-associated protein 4); Encodes a plasma membrane localized ATPase transpor      | 1.372  | 4.70E-06 |
| At2g48150 | ATGPX4 (glutathione peroxidase 4); Encodes glutathione peroxidase.                                           | 1.831  | 4.61E-05 |
| At3g01060 | unknown protein                                                                                              | 2.092  | 3.88E-09 |
| At3g01070 | ENODL16 (early nodulin-like protein 16)                                                                      | 4.493  | 2.55E-12 |
| At3g01080 | ATWRKY58 (WRKY DNA-BINDING PROTEIN 58); member of WRKY Transcription Factor; Group I                         | 1.762  | 3.78E-07 |
| At3g01175 | Protein of unknown function (DUF1666)                                                                        | 2.68   | 1.43E-07 |
| At3g01220 | ATHB20 (homeobox protein 20); Encodes a homeodomain leucine zipper class I (HD-Zip I) protein. Express       | 1.029  | 3.39E-06 |
| At3g01290 | SPFH/Band 7/PHB domain-containing membrane-associated protein family                                         | 1.168  | 1.46E-05 |
| At3g01311 | Protein of unknown function (DUF569)                                                                         | 2.221  | 1.62E-08 |
| At3g01322 | ECA1-like gametogenesis related family protein; Encodes a ECA1 gametogenesis related family protein          | 1.601  | 4.68E-09 |
| At3g01350 | Major facilitator superfamily protein                                                                        | -1.431 | 4.64E-09 |
| At3g01400 | ARM repeat superfamily protein                                                                               | 1.497  | 2.95E-08 |
| At3g01420 | ALPHA-DOX1 (alpha-dioxygenase 1); Encodes an alpha-dioxygenase involved in protection against oxidative      | -1.868 | 0.0012   |
| At3g01490 | Protein kinase superfamily protein                                                                           | -1.043 | 4.16E-06 |
| At3g01500 | ATBCA1 (BETA CARBONIC ANHYDRASE 1); Encodes a putative beta-carbonic anhydrase betaCA1. Toge                 | 1.877  | 7.69E-05 |
| At3g01550 | ATPPT2 (PHOSPHOENOLPYRUVATE (PEP)/PHOSPHATE TRANSLOCATOR 2)                                                  | 1.627  | 9.06E-06 |
| At3g01690 | alpha/beta-Hydrolases superfamily protein                                                                    | -1.06  | 1.72E-06 |

|           |                                                                                                                |        |          |
|-----------|----------------------------------------------------------------------------------------------------------------|--------|----------|
| At3g01750 | Ankyrin repeat family protein                                                                                  | -1.023 | 2.90E-06 |
| At3g01820 | P-loop containing nucleoside triphosphate hydrolases superfamily protein                                       | 1.426  | 6.16E-07 |
| At3g01830 | Calcium-binding EF-hand family protein                                                                         | 2.119  | 0.0164   |
| At3g01940 | Protein of unknown function (DUF 3339)                                                                         | -1.073 | 3.45E-06 |
| At3g01960 | unknown protein                                                                                                | -1.44  | 2.88E-05 |
| At3g02020 | AK3 (aspartate kinase 3); encodes a monofunctional aspartate kinase                                            | -4.592 | 2.05E-11 |
| At3g02040 | SRG3 (senescence-related gene 3)                                                                               | -1.476 | 0.0027   |
| At3g02140 | AFP4 (ABI FIVE BINDING PROTEIN 4); Encodes a protein that acts in the nucleus and is an important nega         | 1.563  | 3.39E-08 |
| At3g02170 | LNG2 (LONGIFOLIA2); Encodes LONGIFOLIA2 (LNG2). Regulates leaf morphology by promoting cell exp;               | -1.126 | 1.68E-05 |
| At3g02380 | ATCOL2 (CONSTANS-LIKE 2); homologous to the flowering-time gene CONSTANS (CO) encoding zinc-fir                | 1.29   | 8.67E-05 |
| At3g02480 | Late embryogenesis abundant protein (LEA) family protein                                                       | 3.255  | 0.00867  |
| At3g02555 | unknown protein                                                                                                | 1.28   | 2.30E-07 |
| At3g02800 | Tyrosine phosphatase family protein                                                                            | 1.05   | 0.001    |
| At3g02840 | ARM repeat superfamily protein                                                                                 | 4.744  | 1.44E-09 |
| At3g02860 | zinc ion binding                                                                                               | 1.829  | 8.64E-10 |
| At3g02885 | GASA5 (GAST1 protein homolog 5)                                                                                | -1.015 | 0.00649  |
| At3g02990 | ATHSFA1E (heat shock transcription factor A1E); member of Heat Stress Transcription Factor (Hsf) family        | 4.851  | 1.30E-10 |
| At3g03060 | P-loop containing nucleoside triphosphate hydrolases superfamily protein                                       | 2.024  | 6.16E-08 |
| At3g03110 | XPO1B (exportin 1B); Encodes a member of the exportin family (XPO1B)which function as receptors for nucl       | 1.062  | 2.08E-05 |
| At3g03190 | ATGSTF11 (glutathione S-transferase F11); Encodes glutathione transferase belonging to the phi class of GST    | -3.17  | 1.20E-09 |
| At3g03240 | alpha/beta-Hydrolases superfamily protein                                                                      | 1.583  | 2.81E-07 |
| At3g03260 | HDG8 (homeodomain GLABROUS 8); Encodes a homeobox-leucine zipper family protein belonging to the H             | 3.191  | 1.33E-07 |
| At3g03270 | Adenine nucleotide alpha hydrolases-like superfamily protein                                                   | 2.192  | 2.22E-07 |
| At3g03310 | ATLCAT3 (ARABIDOPSIS LECITHIN:CHOLESTEROL ACYLTRANSFERASE 3)                                                   | 1.882  | 1.89E-09 |
| At3g03320 | RNA-binding ASCH domain protein                                                                                | 1.376  | 7.98E-08 |
| At3g03341 | unknown protein                                                                                                | 2.476  | 0.00051  |
| At3g03440 | ARM repeat superfamily protein                                                                                 | 2.489  | 3.66E-09 |
| At3g03470 | CYP89A9 (cytochrome P450, family 87, subfamily A, polypeptide 9); member of CYP89A                             | -1.1   | 6.14E-05 |
| At3g03510 | Phototropic-responsive NPH3 family protein                                                                     | 1.458  | 2.92E-08 |
| At3g03750 | SDG20 (SET domain protein 20)                                                                                  | 1.395  | 7.54E-09 |
| At3g03820 | SAUR-like auxin-responsive protein family                                                                      | -1.674 | 3.72E-06 |
| At3g03840 | SAUR-like auxin-responsive protein family                                                                      | -1.1   | 1.74E-05 |
| At3g03850 | SAUR-like auxin-responsive protein family                                                                      | -1.597 | 1.13E-05 |
| At3g03855 | expressed protein, similar to GB:AAC72977 (Arabidopsis thaliana); pseudogene of disease resistance protein     | 3.446  | 3.31E-11 |
| At3g03950 | ECT1 (evolutionarily conserved C-terminal region 1); Physically interacts with CIPK1. Located in the nucleus.  | 1.396  | 1.52E-07 |
| At3g04000 | NAD(P)-binding Rossmann-fold superfamily protein                                                               | 1.284  | 1.61E-06 |
| At3g04010 | O-Glycosyl hydrolases family 17 protein                                                                        | 2.259  | 1.69E-09 |
| At3g04050 | Pyruvate kinase family protein                                                                                 | 1.288  | 7.78E-08 |
| At3g04100 | AGL57 (AGAMOUS-like 57)                                                                                        | 1.733  | 2.84E-08 |
| At3g04110 | GLR1 (GLUTAMATE RECEPTOR 1); putative glutamate receptor (GLR1.1). Contains a functional cation - p            | 1.509  | 6.13E-07 |
| At3g04120 | GAPC (GLYCERALDEHYDE-3-PHOSPHATE DEHYDROGENASE C SUBUNIT); encodes cytosolic GAD1                              | 1.033  | 0.0002   |
| At3g04130 | Tetratricopeptide repeat (TPR)-like superfamily protein                                                        | 1.628  | 4.44E-09 |
| At3g04200 | RmlC-like cupins superfamily protein                                                                           | 3.83   | 9.43E-09 |
| At3g04220 | Disease resistance protein (TIR-NBS-LRR class) family                                                          | 1.577  | 8.42E-07 |
| At3g04300 | RmlC-like cupins superfamily protein                                                                           | 2.222  | 2.92E-08 |
| At3g04330 | Kunitz family trypsin and protease inhibitor protein                                                           | 2.333  | 9.07E-11 |
| At3g04360 | Calcium-dependent lipid-binding (CaLB domain) family protein                                                   | 1.47   | 4.20E-06 |
| At3g04380 | SDG31 (SET DOMAIN PROTEIN 31); Encodes SUVVR4, a nucleolar histone methyltransferase with preferenc            | 1.238  | 7.22E-08 |
| At3g04410 | NAC (No Apical Meristem) domain transcriptional regulator superfamily protein                                  | 1.1    | 1.14E-06 |
| At3g04530 | PEPCK2 (PHOSPHOENOLPYRUVATE CARBOXYLASE KINASE 2); Encodes a second Arabidopsis phosph                         | -1.226 | 0.03217  |
| At3g04550 | unknown protein                                                                                                | -1.29  | 2.73E-08 |
| At3g04620 | Alba DNA/RNA-binding protein                                                                                   | 1.416  | 8.99E-07 |
| At3g04710 | ankyrin repeat family protein                                                                                  | 3.375  | 7.58E-11 |
| At3g04717 | pseudogene, similar to pathogen- and wound-inducible antifungal protein CBP20 precursor, similar to pathoge    | -1.493 | 0.00062  |
| At3g04720 | HEL (HEVEIN-LIKE); Encodes a protein similar to the antifungal chitin-binding protein hevein from rubber tu    | -1.407 | 5.42E-05 |
| At3g04760 | Pentatricopeptide repeat (PPR-like) superfamily protein                                                        | -1.075 | 1.12E-07 |
| At3g04910 | WNK1 (with no lysine (K) kinase 1); Serine/threonine protein kinase, whose transcription is regulated by circa | -1.643 | 1.94E-08 |
| At3g04980 | DNAJ heat shock N-terminal domain-containing protein                                                           | -1.153 | 1.32E-07 |
| At3g05030 | NHX2 (sodium hydrogen exchanger 2); member of Sodium proton exchanger family                                   | 2.595  | 1.01E-10 |
| At3g05140 | RBK2 (ROP binding protein kinases 2)                                                                           | -1.358 | 3.74E-06 |
| At3g05150 | Major facilitator superfamily protein                                                                          | -1.083 | 0.0007   |
| At3g05160 | Major facilitator superfamily protein                                                                          | -1.522 | 3.24E-09 |
| At3g05165 | Major facilitator superfamily protein                                                                          | 1.567  | 2.12E-07 |
| At3g05200 | ATL6 (RING/U-box superfamily protein); Encodes a putative RING-H2 zinc finger protein ATL6 (ATL6).             | 1.122  | 2.39E-05 |
| At3g05220 | Heavy metal transport/detoxification superfamily protein                                                       | -1.011 | 0.0011   |
| At3g05360 | AtRLP30 (receptor like protein 30)                                                                             | 2.942  | 2.21E-07 |
| At3g05390 | FUNCTIONS IN: molecular_function unknown; INVOLVED IN: biological_process unknown; LOCATED IN                  | 1.889  | 9.54E-09 |

|           |                                                                                                                |        |          |
|-----------|----------------------------------------------------------------------------------------------------------------|--------|----------|
| At3g05400 | Major facilitator superfamily protein                                                                          | 3.032  | 9.08E-10 |
| At3g05430 | Tudor/PWWP/MBT superfamily protein                                                                             | 1.076  | 1.37E-05 |
| At3g05500 | Rubber elongation factor protein (REF)                                                                         | 1.328  | 4.41E-06 |
| At3g05580 | Calcineurin-like metallo-phosphoesterase superfamily protein                                                   | 2.128  | 3.68E-10 |
| At3g05630 | PDLZ2 (PHOSPHOLIPASE D ZETA 2); Encodes a member of the PXPB-PLD subfamily of phospholipase D                  | -1.606 | 0.00017  |
| At3g05770 | unknown protein                                                                                                | 1.122  | 9.03E-05 |
| At3g05800 | AIF1 (AtBS1(activation-tagged BRI1 suppressor 1)-interacting factor 1)                                         | -1.232 | 9.38E-06 |
| At3g05880 | RC12A (RARE-COLD-INDUCIBLE 2A); Induced by low temperatures, dehydration and salt stress and ABA.              | -1.743 | 7.58E-06 |
| At3g05905 | other RNA; Potential natural antisense gene, locus overlaps with AT3G05900                                     | 2.67   | 1.00E-09 |
| At3g06070 | unknown protein                                                                                                | -1.981 | 6.29E-07 |
| At3g06420 | ATG8H (autophagy 8h)                                                                                           | 2.882  | 3.46E-10 |
| At3g06540 | REP (Rab escort protein)                                                                                       | 1.332  | 1.20E-08 |
| At3g06660 | PAPA-1-like family protein / zinc finger (HIT type) family protein                                             | 1.447  | 1.15E-07 |
| At3g06750 | hydroxyproline-rich glycoprotein family protein                                                                | -1.285 | 2.42E-06 |
| At3g06760 | Drought-responsive family protein                                                                              | 1.623  | 8.30E-08 |
| At3g06780 | glycine-rich protein                                                                                           | 1.054  | 9.99E-06 |
| At3g06985 | LCR44 (low-molecular-weight cysteine-rich 44); Encodes a member of a family of small, secreted, cysteine rich  | 2.18   | 1.39E-08 |
| At3g06995 | Encodes a Defensin-like (DEFL) family protein [pseudogene]; Encodes a Defensin-like (DEFL) family protein      | 1.716  | 1.35E-07 |
| At3g07000 | Cysteine/Histidine-rich C1 domain family protein                                                               | -1.157 | 5.13E-06 |
| At3g07010 | Pectin lyase-like superfamily protein                                                                          | -1.603 | 2.74E-07 |
| At3g07090 | PPPDE putative thiol peptidase family protein                                                                  | 4.375  | 2.31E-12 |
| At3g07130 | ATPAP15 (PURPLE ACID PHOSPHATASE 15); Encodes PAP15, a purple acid phosphatase with phytase ac                 | -1.175 | 1.86E-07 |
| At3g07150 | unknown protein                                                                                                | 6.45   | 2.65E-14 |
| At3g07195 | RPM1-interacting protein 4 (RIN4) family protein                                                               | 2.708  | 5.48E-08 |
| At3g07340 | basic helix-loop-helix (bHLH) DNA-binding superfamily protein                                                  | -1.206 | 5.61E-05 |
| At3g07370 | ATCHIP (CARBOXYL TERMINUS OF HSC70-INTERACTING PROTEIN); Encodes AtCHIP, a new class c                         | 1.715  | 6.46E-09 |
| At3g07460 | Protein of unknown function, DUF538                                                                            | -1.046 | 2.74E-06 |
| At3g07490 | AGD11 (ARF-GAP domain 11); A member of ARF GAP domain (AGD), Arabidopsis has 15 members, grouped               | 3.213  | 4.07E-11 |
| At3g07565 | Protein of unknown function (DUF3755)                                                                          | 1.019  | 3.18E-07 |
| At3g07650 | COL9 (CONSTANS-like 9); This gene belongs to the CO (CONSTANS) gene family. This gene family is divided        | -1.255 | 3.59E-06 |
| At3g07720 | Galactose oxidase/kelch repeat superfamily protein                                                             | 1.321  | 7.31E-06 |
| At3g07770 | AtHsp90-6 (HEAT SHOCK PROTEIN 90-6)                                                                            | 1.394  | 8.60E-06 |
| At3g07780 | OBE1 (OBERON1); Encodes a nuclear PHD finger protein that is functionally redundant with OBE2 and plays        | 1.191  | 2.60E-08 |
| At3g07870 | F-box and associated interaction domains-containing protein                                                    | 1.471  | 6.79E-07 |
| At3g07890 | Ypt/Rab-GAP domain of gyp1p superfamily protein                                                                | 1.156  | 4.15E-06 |
| At3g07990 | SCPL27 (serine carboxypeptidase-like 27)                                                                       | -1.064 | 3.65E-07 |
| At3g08490 | BEST Arabidopsis thaliana protein match is: Late embryogenesis abundant protein, group 2 (TAIR:AT3G2460)       | -1.275 | 4.42E-08 |
| At3g08505 | zinc finger (CCCH-type/C3HC4-type RING finger) family protein                                                  | 1.189  | 8.19E-08 |
| At3g08570 | Phototropic-responsive NPH3 family protein                                                                     | 2.01   | 2.81E-08 |
| At3g08590 | Phosphoglycerate mutase, 2,3-bisphosphoglycerate-independent                                                   | 2.543  | 2.84E-08 |
| At3g08660 | Phototropic-responsive NPH3 family protein                                                                     | -1.967 | 1.67E-08 |
| At3g08690 | UBC11 (ubiquitin-conjugating enzyme 11)                                                                        | 3.357  | 4.83E-11 |
| At3g08700 | UBC12 (ubiquitin-conjugating enzyme 12)                                                                        | 4.226  | 0.00011  |
| At3g08710 | ATH9 (thioredoxin H-type 9); Associated to plasma membrane. Moves cell to cell, suggesting a role in intercell | 1.931  | 4.42E-09 |
| At3g08720 | ATPK19 (Arabidopsis thaliana protein kinase 19); Encodes a ribosomal-protein S6 kinase. Gene expression is     | 1.102  | 3.77E-05 |
| At3g08730 | ATPK1 (ARABIDOPSIS THALIANA PROTEIN-SERINE KINASE 1); Encodes a protein-serine kinase that p                   | 2.054  | 1.98E-09 |
| At3g08860 | PYD4 (PYRIMIDINE 4); Encodes a protein that is predicted to have beta-alanine aminotransferase activity.       | 1.401  | 0.002    |
| At3g08960 | ARM repeat superfamily protein                                                                                 | 1.805  | 0.0015   |
| At3g08970 | TMS1 (THERMOSENSITIVE MALE STERILE 1); J domain protein localized in ER lumen. Can compensate                  | 6.603  | 5.86E-12 |
| At3g09000 | proline-rich family protein                                                                                    | 1.543  | 8.70E-09 |
| At3g09010 | Protein kinase superfamily protein                                                                             | 2.235  | 5.02E-09 |
| At3g09030 | BTB/POZ domain-containing protein                                                                              | 1.148  | 4.42E-08 |
| At3g09085 | Protein of unknown function (DUF962)                                                                           | 1.957  | 2.72E-09 |
| At3g09220 | LAC7 (laccase 7); putative laccase, a member of laccase family of genes (17 members in Arabidopsis).           | -2.033 | 5.60E-07 |
| At3g09230 | AtMYB1 (myb domain protein 1); member of MYB3R- and R2R3- type MYB- encoding genes                             | 2.225  | 1.51E-10 |
| At3g09280 | unknown protein                                                                                                | 1.393  | 3.71E-05 |
| At3g09290 | TAC1 (telomerase activator1); encodes activation factor TAC1 which mediates telomerase activity                | -1.104 | 0.0013   |
| At3g09350 | Fes1A (Fes1A); Encodes one of the Arabidopsis orthologs of the human Hsp70-binding protein 1 (HspBP-1) a       | 5.714  | 7.06E-13 |
| At3g09370 | AtMYB3R3 (myb domain protein 3R3); putative c-myb-like transcription factor (MYB3R3) mRNA,                     | 1.545  | 0.003    |
| At3g09385 | pseudogene, hypothetical protein                                                                               | 1.306  | 5.15E-09 |
| At3g09400 | PLL3 (pol-like 3); Similar to POLTERGEIST (POL) protein phosphatase 2C. No phenotype observed in plants        | 1.278  | 6.90E-08 |
| At3g09440 | Heat shock protein 70 (Hsp 70) family protein                                                                  | 2.203  | 6.88E-07 |
| At3g09450 | CONTAINS InterPro DOMAIN/s: Fusaric acid resistance protein, conserved region (InterPro:IPR006726); BE         | 2.95   | 1.09E-08 |
| At3g09490 | Tetratricopeptide repeat (TPR)-like superfamily protein                                                        | 1.401  | 1.58E-06 |
| At3g09520 | ATEXO70H4 (exocyst subunit exo70 family protein H4); A member of EXO70 gene family, putative exocyst :         | 5.242  | 5.91E-12 |
| At3g09550 | Ankyrin repeat family protein                                                                                  | -1.448 | 3.51E-08 |
| At3g09560 | ATPAH1 (PHOSPHATIDIC ACID PHOSPHOHYDROLASE 1)                                                                  | 1.871  | 2.99E-10 |

|           |                                                                                                                  |        |          |
|-----------|------------------------------------------------------------------------------------------------------------------|--------|----------|
| At3g09570 | Lung seven transmembrane receptor family protein                                                                 | 1.125  | 3.74E-08 |
| At3g09580 | FAD/NAD(P)-binding oxidoreductase family protein                                                                 | -1.116 | 1.69E-07 |
| At3g09600 | Homeodomain-like superfamily protein                                                                             | 2.344  | 3.35E-08 |
| At3g09640 | APX1B (ASCORBATE PEROXIDASE 1B); Encodes a cytosolic ascorbate peroxidase APX2. Ascorbate perc                   | 10.595 | 1.84E-12 |
| At3g09830 | Protein kinase superfamily protein                                                                               | 1.437  | 0.0042   |
| At3g09840 | CDC48 (cell division cycle 48); Encodes a cell division cycle protein, a member of AAA-type ATPases gene f       | 1.151  | 2.76E-06 |
| At3g09870 | SAUR-like auxin-responsive protein family                                                                        | 2.263  | 4.31E-06 |
| At3g09922 | ATIPS1 (A. THALIANA INDUCED BY PHOSPHATE STARVATION1); AF236376 Arabidopsis thaliana IP                          | -1.825 | 0.01653  |
| At3g10020 | unknown protein                                                                                                  | 1.941  | 2.81E-07 |
| At3g10080 | RmlC-like cupins superfamily protein                                                                             | -1.26  | 6.13E-07 |
| At3g10114 | pseudogene of glycosyl hydrolase family 81 protein; pseudogene of glycosyl hydrolase family 81 protein           | 3.125  | 6.21E-11 |
| At3g10150 | PAP16 (purple acid phosphatase 16)                                                                               | -1.418 | 0.00013  |
| At3g10250 | Plant protein 1589 of unknown function                                                                           | 1.367  | 9.63E-09 |
| At3g10450 | SCPL7 (serine carboxypeptidase-like 7)                                                                           | 1.122  | 6.49E-06 |
| At3g10500 | anac053 (NAC domain containing protein 53)                                                                       | 1.607  | 4.22E-08 |
| At3g10510 | Galactose oxidase/kelch repeat superfamily protein                                                               | 1.602  | 2.42E-06 |
| At3g10520 | AHB2 (haemoglobin 2); class 2 non-symbiotic hemoglobin                                                           | -1.259 | 1.42E-06 |
| At3g10525 | LGO (LOSS OF GIANT CELLS FROM ORGANS); Encodes LGO (loss of giant cells from organs) required fr                 | -1.131 | 2.92E-05 |
| At3g10640 | VPS60.1 (SNF7 family protein)                                                                                    | 2.752  | 4.44E-12 |
| At3g10800 | BZIP28 (Basic-leucine zipper (bZIP) transcription factor family protein); Encodes bZIP28, a putative membrai     | 1.346  | 1.70E-07 |
| At3g10815 | RING/U-box superfamily protein                                                                                   | 3.391  | 2.13E-09 |
| At3g10820 | Transcription elongation factor (TFIIS) family protein                                                           | 3.008  | 1.11E-10 |
| At3g10830 | NA                                                                                                               | 1.968  | 4.45E-09 |
| At3g10985 | ATWI-12 (ARABIDOPSIS THALIANA WOUND-INDUCED PROTEIN 12); A senescence-associated gene v                          | 2.039  | 1.85E-07 |
| At3g11010 | AtRLP34 (receptor like protein 34)                                                                               | 1.181  | 0.00207  |
| At3g11020 | DREB2 (DEHYDRATION-RESPONSIVE ELEMENT BINDING PROTEIN 2); encodes a member of the DRI                            | 1.974  | 5.80E-08 |
| At3g11080 | AtRLP35 (receptor like protein 35)                                                                               | 2.018  | 1.26E-06 |
| At3g11150 | 2-oxoglutarate (2OG) and Fe(II)-dependent oxygenase superfamily protein                                          | -1.039 | 5.58E-05 |
| At3g11310 | unknown protein                                                                                                  | 2.068  | 2.06E-11 |
| At3g11320 | Nucleotide-sugar transporter family protein                                                                      | 1.046  | 3.25E-05 |
| At3g11440 | ATMYB65 (MYB DOMAIN PROTEIN 65); Member of the R2R3-MYB gene family. Similar to GA-induced                       | 1.573  | 5.20E-09 |
| At3g11660 | NHL1 (NDR1/HIN1-like 1); encodes a protein whose sequence is similar to tobacco hairpin-induced gene (HII        | -1.186 | 0.0001   |
| At3g11700 | FLA18 (FASCICLIN-like arabinogalactan protein 18 precursor)                                                      | -1.024 | 7.82E-06 |
| At3g11820 | ATSYR1 (SYNTAXIN RELATED PROTEIN 1); Encodes a syntaxin localized at the plasma membrane (SYR                    | 3.201  | 2.81E-10 |
| At3g11840 | PUB24 (plant U-box 24); Encodes a U-box-domain-containing E3 ubiquitin ligase that acts as a negative regul      | 1.127  | 0.0056   |
| At3g11900 | ANT1 (aromatic and neutral transporter 1); encodes an amino acid transporter that transports aromatic and neu    | 1.316  | 3.56E-08 |
| At3g12040 | DNA-3-methyladenine glycosylase (MAG)                                                                            | 2.98   | 1.15E-11 |
| At3g12050 | Aha1 domain-containing protein                                                                                   | 3.592  | 3.70E-12 |
| At3g12060 | TBL1 (TRICHOME BIREFRINGENCE-LIKE 1); Encodes a member of the TBL (TRICHOME BIREFRINGE                           | 1.122  | 0.00036  |
| At3g12190 | BEST Arabidopsis thaliana protein match is: Frigida-like protein (TAIR:AT5G27220.1)                              | 2.248  | 0.00122  |
| At3g12300 | unknown protein                                                                                                  | 1.212  | 3.51E-07 |
| At3g12320 | unknown protein                                                                                                  | 3.518  | 2.84E-11 |
| At3g12510 | MADS-box family protein                                                                                          | 2.609  | 2.05E-09 |
| At3g12520 | SULTR4.2 (sulfate transporter 4.2); Encodes a sulfate transporter that in induced under sulfate limitation.      | 2.227  | 3.27E-10 |
| At3g12580 | ATHSP70 (ARABIDOPSIS HEAT SHOCK PROTEIN 70)                                                                      | 6.38   | 2.70E-12 |
| At3g12610 | DRT100 (DNA-DAMAGE REPAIR/TOLERATION 100); Plays role in DNA-damage repair/toleration. Partial                   | -1.571 | 1.22E-06 |
| At3g12630 | A20/AN1-like zinc finger family protein                                                                          | 1.101  | 9.17E-08 |
| At3g12710 | DNA glycosylase superfamily protein                                                                              | -1.128 | 5.41E-06 |
| At3g12740 | ALIS1 (ALA-interacting subunit 1); Physically interacts with ALA3, and is required for the phospholipid trans    | 2.639  | 2.01E-10 |
| At3g12750 | ZIP1 (zinc transporter 1 precursor); A member of Zrt- and Irt-related protein (ZIP) family. transcript is induce | -1.169 | 1.45E-07 |
| At3g12770 | MEF22 (mitochondrial editing factor 22); Encodes a pentatricopeptide repeat protein (PPR) protein involved i     | -1.024 | 2.15E-05 |
| At3g12820 | AtMYB10 (myb domain protein 10); Member of the R2R3 factor gene family.                                          | -1.633 | 4.90E-07 |
| At3g12830 | SAUR-like auxin-responsive protein family                                                                        | -1.027 | 2.33E-06 |
| At3g12910 | NAC (No Apical Meristem) domain transcriptional regulator superfamily protein                                    | 4.451  | 2.88E-08 |
| At3g12915 | Ribosomal protein S5/Elongation factor G/III/V family protein                                                    | -1.122 | 4.82E-06 |
| At3g12920 | SBP (S-ribonuclease binding protein) family protein                                                              | -1.465 | 3.75E-08 |
| At3g13061 | other RNA; Potential natural antisense gene, locus overlaps with AT3G13060                                       | -1.517 | 0.0005   |
| At3g13080 | ATMRP3 (multidrug resistance-associated protein 3); encodes an ATP-dependent MRP-like ABC transporter :          | 1.192  | 0.0002   |
| At3g13130 | unknown protein                                                                                                  | 1.709  | 2.51E-07 |
| At3g13227 | serine-rich protein-related                                                                                      | 2.794  | 1.64E-08 |
| At3g13229 | Plant protein of unknown function (DUF868)                                                                       | 2.462  | 2.92E-09 |
| At3g13235 | ubiquitin family protein                                                                                         | 1.777  | 5.83E-08 |
| At3g13330 | PA200 (proteasome activating protein 200); Encodes a protein that interacts with the 26S proteasome. Mutant      | 1.534  | 0.0002   |
| At3g13470 | TCP-1/cpn60 chaperonin family protein                                                                            | 1.326  | 1.33E-06 |
| At3g13610 | 2-oxoglutarate (2OG) and Fe(II)-dependent oxygenase superfamily protein                                          | 2.304  | 0.00465  |
| At3g13672 | TRAF-like superfamily protein                                                                                    | -1.272 | 3.12E-05 |
| At3g13682 | LDL2 (LSD1-like2); Encodes a homolog of human Lysine-Specific Demethylase1. Involved in H3K4 methyla             | -1.053 | 3.32E-07 |

|           |                                                                                                                   |        |          |
|-----------|-------------------------------------------------------------------------------------------------------------------|--------|----------|
| At3g13720 | PRA1.F3 (PRENYLATED RAB ACCEPTOR 1.F3)                                                                            | -1.04  | 0.0015   |
| At3g13730 | CYP90D1 (cytochrome P450, family 90, subfamily D, polypeptide 1); Encodes a cytochrome P-450 gene that i          | -1.081 | 7.30E-06 |
| At3g13740 | Ribonuclease III family protein                                                                                   | -1.014 | 4.76E-07 |
| At3g13750 | BGAL1 (beta galactosidase 1); beta-galactosidase, glycosyl hydrolase family 35                                    | -1.614 | 3.56E-07 |
| At3g13820 | F-box and associated interaction domains-containing protein                                                       | -1.055 | 1.96E-07 |
| At3g13850 | LBD22 (LOB domain-containing protein 22)                                                                          | 1.263  | 1.80E-05 |
| At3g13910 | Protein of unknown function (DUF3511)                                                                             | 1.345  | 4.48E-07 |
| At3g13980 | unknown protein                                                                                                   | -1.16  | 1.46E-06 |
| At3g14075 | Mono-/di-acylglycerol lipase, N-terminal                                                                          | 1.163  | 0.003    |
| At3g14200 | Chaperone DnaJ-domain superfamily protein                                                                         | 3.96   | 4.02E-12 |
| At3g14210 | ESM1 (epithiospecifier modifier 1); A semidominant QTL which has an epistatic effect on the Epithiospecifiei      | -1.409 | 8.27E-06 |
| At3g14225 | GLIP4 (GDSL-motif lipase 4); Contains lipase signature motif and GDSL domain.                                     | 1.594  | 9.07E-09 |
| At3g14280 | unknown protein                                                                                                   | -1.488 | 6.01E-06 |
| At3g14300 | ATPME26 (A. THALIANA PECTIN METHYLESTERASE 26)                                                                    | 1.958  | 1.83E-06 |
| At3g14310 | ATPME3 (pectin methylesterase 3); encodes a pectin methylesterase, targeted by a cellulose binding protein (C     | -1.388 | 2.47E-06 |
| At3g14370 | WAG2 (Protein kinase superfamily protein); The WAG2 and its homolog, WAG1 each encodes protein-serine             | -2.017 | 5.40E-08 |
| At3g14420 | Aldolase-type TIM barrel family protein                                                                           | 1.362  | 4.26E-05 |
| At3g14560 | unknown protein                                                                                                   | -1.882 | 2.92E-09 |
| At3g14620 | CYP72A8 (cytochrome P450, family 72, subfamily A, polypeptide 8); putative cytochrome P450                        | 1.772  | 1.15E-07 |
| At3g14630 | CYP72A9 (cytochrome P450, family 72, subfamily A, polypeptide 9); putative cytochrome P450                        | 2.21   | 8.29E-09 |
| At3g14730 | Pentatricopeptide repeat (PPR) superfamily protein                                                                | -1.04  | 3.97E-07 |
| At3g14820 | GDSL-like Lipase/Acylhydrolase superfamily protein                                                                | 1.33   | 0.00043  |
| At3g14850 | TBL41 (TRICHOME BIREFRINGENCE-LIKE 41); Encodes a member of the TBL (TRICHOME BIREFRINC                           | 1.277  | 2.41E-06 |
| At3g15060 | AtRABA1g (RAB GTPase homolog A1G)                                                                                 | 1.284  | 3.84E-09 |
| At3g15080 | Polynucleotidyl transferase, ribonuclease H-like superfamily protein                                              | 1.11   | 5.11E-07 |
| At3g15340 | PPI2 (proton pump interactor 2); Hypothetical protein similar to PPI1, a protein that interacts with the plasma   | 5.03   | 8.74E-12 |
| At3g15356 | Legume lectin family protein                                                                                      | 1.821  | 3.02E-06 |
| At3g15440 | BEST Arabidopsis thaliana protein match is: RING/U-box superfamily protein (TAIR:AT3G15740.1)                     | -1.855 | 2.19E-06 |
| At3g15450 | Aluminium induced protein with YGL and LRDR motifs                                                                | -2.443 | 7.26E-08 |
| At3g15500 | ANAC055 (NAC domain containing protein 55); Encodes an ATAF-like NAC-domain transcription factor tha              | -1.91  | 3.00E-05 |
| At3g15510 | ANAC056 (Arabidopsis NAC domain containing protein 56); Note of caution: not to be confused with another          | -1.14  | 0.0005   |
| At3g15518 | unknown protein                                                                                                   | 4.337  | 9.00E-11 |
| At3g15570 | Phototropic-responsive NPH3 family protein                                                                        | -1.281 | 3.12E-07 |
| At3g15630 | unknown protein                                                                                                   | -2.289 | 1.22E-06 |
| At3g15720 | Pectin lyase-like superfamily protein                                                                             | -1.51  | 2.56E-06 |
| At3g15770 | unknown protein                                                                                                   | 1.189  | 6.41E-08 |
| At3g15840 | PIFI (post-illumination chlorophyll fluorescence increase); Encodes a chloroplast-targeted protein localized in   | -1.493 | 4.09E-05 |
| At3g16030 | CES101 (CALLUS EXPRESSION OF RBCS 101)                                                                            | 1.347  | 3.10E-07 |
| At3g16040 | Translation machinery associated TMA7                                                                             | 1.716  | 0.00135  |
| At3g16050 | ATPDX1.2 (ARABIDOPSIS THALIANA PYRIDOXINE BIOSYNTHESIS 1.2); Encodes a protein with pyrid                         | 4.433  | 3.76E-12 |
| At3g16175 | Thioesterase superfamily protein                                                                                  | 1.789  | 3.51E-07 |
| At3g16180 | Major facilitator superfamily protein                                                                             | -1.934 | 8.67E-09 |
| At3g16240 | DELTA-TIP (delta tonoplast integral protein); Delta tonoplast intrinsic protein, functions as a water channel ar  | -1.09  | 1.33E-05 |
| At3g16370 | GDSL-like Lipase/Acylhydrolase superfamily protein                                                                | -1.54  | 3.56E-06 |
| At3g16510 | Calcium-dependent lipid-binding (CaLB domain) family protein                                                      | 2.468  | 2.30E-08 |
| At3g16530 | Legume lectin family protein; Lectin like protein whose expression is induced upon treatment with chitin oligo    | 1.439  | 1.58E-05 |
| At3g16570 | ATRALF23 (ARABIDOPSIS RAPID ALKALINIZATION FACTOR 23); Encodes RALF23, a member of a di                           | -1.201 | 6.23E-05 |
| At3g16690 | Nodulin MtN3 family protein                                                                                       | -1.174 | 1.63E-05 |
| At3g16770 | ATEBP (ethylene-responsive element binding protein); Encodes a member of the ERF (ethylene response fact          | -1.334 | 2.40E-07 |
| At3g17010 | AP2/B3-like transcriptional factor family protein; transcriptional factor B3 family protein, contains Pfam profil | 1.124  | 9.39E-07 |
| At3g17050 | Arabidopsis thaliana (pseudogene, glycine-rich protein, similar to glycine-rich protein TIGR:At1g53620.1)         | -1.512 | 5.51E-06 |
| At3g17070 | Peroxidase family protein                                                                                         | -1.876 | 1.69E-05 |
| At3g17110 | pseudogene, glycine-rich protein                                                                                  | 1.73   | 0.0025   |
| At3g17185 | TAS3 (trans-acting siRNA3); Encodes a trans-acting siRNA (tasi-RNA) that regulates the expression of auxin        | -1.012 | 1.38E-05 |
| At3g17190 | unknown protein                                                                                                   | -1.053 | 2.94E-07 |
| At3g17210 | ATHS1 (A. THALIANA HEAT STABLE PROTEIN 1); Encodes a heat stable protein with antimicrobial and                   | 1.013  | 0.0003   |
| At3g17330 | ECT6 (evolutionarily conserved C-terminal region 6)                                                               | 1.657  | 1.78E-08 |
| At3g17400 | F-box family protein                                                                                              | 5.419  | 3.26E-12 |
| At3g17410 | Protein kinase superfamily protein                                                                                | 1.605  | 1.06E-07 |
| At3g17520 | Late embryogenesis abundant protein (LEA) family protein                                                          | 1.458  | 0.03449  |
| At3g17609 | HYH (HY5-homolog); Encodes a homolog of HY5 (HYH). Involved in phyB signaling pathway.                            | 2.55   | 6.21E-09 |
| At3g17611 | ATRBL14 (RHOMBOID-like protein 14)                                                                                | 4.219  | 4.08E-12 |
| At3g17700 | ATCNGC20 (CYCLIC NUCLEOTIDE-GATED CHANNEL 20); cyclic nucleotide-binding transporter 1, men                       | 1.834  | 4.64E-09 |
| At3g17710 | F-box and associated interaction domains-containing protein                                                       | 1.447  | 3.23E-06 |
| At3g17720 | Pyridoxal phosphate (PLP)-dependent transferases superfamily protein                                              | 2.806  | 6.70E-10 |
| At3g17800 | Protein of unknown function (DUF760); mRNA level of the MEB5.2 gene (At3g17800) remains unchanged af              | 1.946  | 1.76E-07 |
| At3g17980 | Calcium-dependent lipid-binding (CaLB domain) family protein                                                      | 3.645  | 6.27E-10 |

|           |                                                                                                                 |        |          |
|-----------|-----------------------------------------------------------------------------------------------------------------|--------|----------|
| At3g18050 | unknown protein                                                                                                 | -1.096 | 2.31E-06 |
| At3g18080 | BGLU44 (B-S glucosidase 44)                                                                                     | -1.121 | 1.57E-06 |
| At3g18290 | BTS (BRUTUS); Encodes BRUTUS (BTS), a putative E3 ligase protein with metal ion binding and DNA bindi           | 1.556  | 3.04E-05 |
| At3g18295 | Protein of unknown function (DUF1639)                                                                           | 1.481  | 1.96E-07 |
| At3g18320 | F-box and associated interaction domains-containing protein                                                     | -1.049 | 8.70E-06 |
| At3g18370 | ATSYTF (C2 domain-containing protein)                                                                           | 1.31   | 3.58E-07 |
| At3g18400 | anac058 (NAC domain containing protein 58)                                                                      | 1.024  | 5.02E-05 |
| At3g18570 | Oleosin family protein                                                                                          | 1.048  | 3.63E-05 |
| At3g18710 | ATPUB29 (ARABIDOPSIS THALIANA PLANT U-BOX 29); Encodes a protein containing a U-box and an A                    | 1.271  | 9.50E-06 |
| At3g18850 | LPAT5 (lysophosphatidyl acyltransferase 5)                                                                      | 1.065  | 1.15E-05 |
| At3g19010 | 2-oxoglutarate (2OG) and Fe(II)-dependent oxygenase superfamily protein                                         | 1.48   | 5.56E-07 |
| At3g19030 | unknown protein                                                                                                 | -1.328 | 1.28E-06 |
| At3g19040 | HAF2 (histone acetyltransferase of the TAFII250 family 2); Encodes a protein similar to TATA-binding protei     | 1.868  | 8.72E-08 |
| At3g19160 | ATIPT8 (ATP/ADP isopentenyltransferases); Encodes cytokinin synthase.                                           | 2.557  | 2.31E-06 |
| At3g19240 | Vacuolar import/degradation, Vid27-related protein                                                              | 1.027  | 0.0001   |
| At3g19260 | LAG1 HOMOLOG 2 (LONGEVITY ASSURANCE GENE1 HOMOLOG 2); LAG1 homolog . Loss of functio                            | 1.853  | 1.20E-08 |
| At3g19270 | CYP707A4 (cytochrome P450, family 707, subfamily A, polypeptide 4); Encodes a protein with ABA 8'-hydr          | 1.878  | 1.12E-06 |
| At3g19350 | MPC (maternally expressed pab C-terminal); Encodes a the C-terminal domain of poly(A) binding proteins. M       | -2.185 | 2.87E-07 |
| At3g19400 | Cysteine proteinases superfamily protein                                                                        | -1.027 | 3.10E-06 |
| At3g19710 | BCAT4 (branched-chain aminotransferase4); Belongs to the branched-chain amino acid aminotransferase gene        | -2.851 | 1.61E-11 |
| At3g19830 | NTMC2T5.2 (Calcium-dependent lipid-binding (CaLB domain) family protein)                                        | 1.607  | 6.00E-08 |
| At3g19850 | Phototropic-responsive NPH3 family protein                                                                      | -2.646 | 2.93E-10 |
| At3g19960 | ATM1 (myosin 1); member of Myosin-like proteins                                                                 | -1.203 | 2.01E-06 |
| At3g19970 | alpha/beta-Hydrolases superfamily protein                                                                       | 1.393  | 1.52E-06 |
| At3g20015 | Eukaryotic aspartyl protease family protein                                                                     | -1.188 | 2.35E-06 |
| At3g20180 | Copper transport protein family                                                                                 | 4.48   | 2.03E-10 |
| At3g20190 | Leucine-rich repeat protein kinase family protein                                                               | 1.947  | 2.45E-09 |
| At3g20210 | DELTA-VPE (delta vacuolar processing enzyme); Encodes a vacuolar processing enzyme with caspase-1-like :        | -1.103 | 0.0063   |
| At3g20470 | GRP-5 (GLYCINE-RICH PROTEIN 5); encodes a glycine-rich protein that is expressed more abundantly in in          | -1.118 | 0.0013   |
| At3g20520 | SVL3 (SHV3-like 3)                                                                                              | 1.085  | 0.00189  |
| At3g20810 | 2-oxoglutarate (2OG) and Fe(II)-dependent oxygenase superfamily protein                                         | -1.878 | 2.43E-09 |
| At3g20820 | Leucine-rich repeat (LRR) family protein                                                                        | -1.409 | 9.85E-09 |
| At3g21070 | ATNADK-1 (NAD KINASE 1); Encodes a protein with NAD(H) kinase activity.                                         | 2.171  | 3.70E-09 |
| At3g21150 | BBX32 (B-box 32); Encodes a protein with a B-box domain predicted to act as a transcription factor. Expressi    | 1.719  | 0.00068  |
| At3g21310 | Core-2/I-branching beta-1,6-N-acetylglucosaminyltransferase family protein                                      | -1.081 | 3.14E-06 |
| At3g21460 | Glutaredoxin family protein                                                                                     | -1.657 | 0.0002   |
| At3g21500 | DXPS1 (1-deoxy-D-xylulose 5-phosphate synthase 1); Encodes a protein postulated to have 1-deoxy-D-xylulo:       | -2.123 | 0.00014  |
| At3g21530 | DNase I-like superfamily protein                                                                                | -1.402 | 2.68E-06 |
| At3g21620 | ERD (early-responsive to dehydration stress) family protein                                                     | -1.857 | 0.00059  |
| At3g21630 | CERK1 (chitin elicitor receptor kinase 1); LysM receptor-like kinase. Essential in the perception and transduct | 1.523  | 3.22E-09 |
| At3g21680 | unknown protein                                                                                                 | -1.173 | 9.68E-06 |
| At3g21700 | SGP2 (Ras-related small GTP-binding family protein); Monomeric G protein. Expressed in root epidermal cell      | 3.76   | 2.75E-11 |
| At3g21780 | UGT71B6 (UDP-glucosyl transferase 71B6); Encodes a protein with UDP-glucosyl transferase activity that wa       | 1.78   | 4.64E-07 |
| At3g21781 | other RNA; Potential natural antisense gene, locus overlaps with AT3G21780                                      | 1.158  | 9.21E-06 |
| At3g21860 | ASK10 (SKP1-like 10)                                                                                            | 1.692  | 7.62E-05 |
| At3g21870 | CYCP2.1 (cyclin p2.1)                                                                                           | 1.166  | 0.0006   |
| At3g21890 | B-box type zinc finger family protein                                                                           | 1.007  | 0.00104  |
| At3g21900 | Receptor-like protein kinase-related family protein                                                             | 3.279  | 2.61E-07 |
| At3g21920 | Domain of unknown function (DUF26)                                                                              | 3.269  | 4.22E-09 |
| At3g21930 | Domain of unknown function (DUF26)                                                                              | 3.242  | 9.89E-09 |
| At3g22060 | Receptor-like protein kinase-related family protein; contains Pfam profile: PF01657 Domain of unknown funct     | 3.461  | 1.59E-08 |
| At3g22090 | unknown protein                                                                                                 | 3.233  | 4.38E-11 |
| At3g22100 | basic helix-loop-helix (bHLH) DNA-binding superfamily protein                                                   | 2.482  | 2.89E-09 |
| At3g22142 | Bifunctional inhibitor/lipid-transfer protein/seed storage 2S albumin superfamily protein; Encodes a Protease i | -1.891 | 1.62E-06 |
| At3g22160 | VQ motif-containing protein                                                                                     | 1.19   | 0.00013  |
| At3g22260 | Cysteine proteinases superfamily protein                                                                        | 1.348  | 2.30E-07 |
| At3g22360 | AOX1B (alternative oxidase 1B); encodes an alternative oxidase whose expression is limited to flowers and fl    | 2.434  | 3.43E-08 |
| At3g22370 | AOX1A (alternative oxidase 1A); Encodes AOX1a, an isoform of alternative oxidase that is expressed in roset     | 3.152  | 9.08E-09 |
| At3g22510 | Pre-rRNA-processing protein TSR2, conserved region                                                              | 3.331  | 2.20E-09 |
| At3g22740 | HMT3 (homocysteine S-methyltransferase 3); homocysteine S-methyltransferase (HMT3)                              | -4.794 | 4.81E-10 |
| At3g22750 | Protein kinase superfamily protein                                                                              | -1.081 | 1.08E-05 |
| At3g22820 | allergen-related                                                                                                | -1.164 | 2.63E-05 |
| At3g22830 | AT-HSFA6B (ARABIDOPSIS THALIANA HEAT SHOCK TRANSCRIPTION FACTOR A6B); member of F                               | -1.106 | 1.97E-06 |
| At3g22840 | ELIP1 (EARLY LIGHT-INDUCIBLE PROTEIN); Encodes an early light-inducible protein.                                | 5.882  | 6.15E-12 |
| At3g22890 | APS1 (ATP sulfurylase 1); encodes ATP sulfurylase, the first enzyme in the sulfate assimilation pathway of Ar   | 1.037  | 1.23E-05 |
| At3g22910 | ATPase E1-E2 type family protein / haloacid dehalogenase-like hydrolase family protein                          | 1.968  | 0.01289  |
| At3g22920 | Cyclophilin-like peptidyl-prolyl cis-trans isomerase family protein                                             | 3.928  | 5.10E-09 |

|           |                                                                                                                  |        |          |
|-----------|------------------------------------------------------------------------------------------------------------------|--------|----------|
| At3g22930 | CML11 (calmodulin-like 11); Encodes a calmodulin-like protein.                                                   | 2.986  | 3.33E-09 |
| At3g22950 | ARFC1 (ADP-ribosylation factor C1); A member of ARF GTPase family. A thaliana has 21 members of this fa          | 1.017  | 1.97E-07 |
| At3g23000 | CIPK7 (CBL-interacting protein kinase 7); Encodes a serine/threonine protein kinase with similarities to CBL-    | 1.03   | 8.25E-07 |
| At3g23020 | Tetratricopeptide repeat (TPR)-like superfamily protein                                                          | -1.194 | 1.22E-06 |
| At3g23030 | IAA2 (indole-3-acetic acid inducible 2); auxin inducible gene expressed in the nucleus                           | -1.86  | 2.16E-08 |
| At3g23050 | AXR2 (AUXIN RESISTANT 2); Transcription regulator acting as repressor of auxin-inducible gene expressio          | -1.155 | 2.33E-06 |
| At3g23110 | AtRLP37 (receptor like protein 37)                                                                               | -1.122 | 3.45E-05 |
| At3g23120 | AtRLP38 (receptor like protein 38)                                                                               | -1.926 | 0.00224  |
| At3g23230 | Integrase-type DNA-binding superfamily protein; encodes a member of the ERF (ethylene response factor) sub       | 4.932  | 3.23E-09 |
| At3g23250 | ATMYB15 (MYB DOMAIN PROTEIN 15); Member of the R2R3 factor gene family.                                          | 1.571  | 9.09E-06 |
| At3g23450 | unknown protein                                                                                                  | -1.137 | 0.0046   |
| At3g23470 | Cyclopropane-fatty-acyl-phospholipid synthase                                                                    | -1.066 | 0.0207   |
| At3g23480 | Cyclopropane-fatty-acyl-phospholipid synthase                                                                    | -2.273 | 4.95E-09 |
| At3g23870 | Protein of unknown function (DUF803)                                                                             | -2.018 | 4.73E-06 |
| At3g23880 | F-box and associated interaction domains-containing protein                                                      | -1.728 | 3.44E-06 |
| At3g23920 | BAM1 (beta-amylase 1); Encodes a chloroplast beta-amylase. Is necessary for leaf starch breakdown in the abs     | 2.011  | 4.40E-09 |
| At3g23980 | BLI (BLISTER); Encodes a protein that interacts with the Polycomb-group (Pc-G) histone methyltransferase C       | 1.069  | 1.07E-07 |
| At3g23990 | HSP60 (heat shock protein 60); mitochondrial chaperonin HSP. assist in rapid assembly of the oligomeric pro      | 1.905  | 2.36E-07 |
| At3g24005 | pseudogene, chaperonin hsp60 (fragment), blastp match of 100% identity and 8.1e-06 P-value to GP 2275832         | 2.003  | 3.63E-08 |
| At3g24090 | glutamine-fructose-6-phosphate transaminase (isomerizing)s                                                       | 2.637  | 2.83E-10 |
| At3g24100 | Uncharacterised protein family SERF                                                                              | 1.688  | 3.35E-07 |
| At3g24140 | FMA (FAMA); Encodes a basic helix-loop-helix transcription factor whose activity is required to promote diff     | -1.503 | 2.56E-07 |
| At3g24170 | ATGR1 (glutathione-disulfide reductase); Encodes a cytosolic glutathione reductase.                              | 1.799  | 6.50E-09 |
| At3g24230 | Pectate lyase family protein                                                                                     | -1.239 | 5.30E-06 |
| At3g24420 | alpha/beta-Hydrolases superfamily protein                                                                        | 2.601  | 1.35E-07 |
| At3g24495 | ATMSH7 (ARABIDOPSIS THALIANA MUTS HOMOLOG 7); encodes a DNA mismatch repair homolog of                           | 1.676  | 3.92E-09 |
| At3g24500 | MBF1C (multiprotein bridging factor 1C); One of three genes in A. thaliana encoding multiprotein bridging fa     | 5.966  | 4.16E-12 |
| At3g24520 | HSFC1 (heat shock transcription factor C1); member of Heat Stress Transcription Factor (Hsf) family              | -1.305 | 5.71E-07 |
| At3g24715 | Protein kinase superfamily protein with octicosapeptide/Phox/Bem1p domain                                        | -1.333 | 2.91E-07 |
| At3g24982 | ATRLP40 (receptor like protein 40)                                                                               | -2.059 | 0.01649  |
| At3g25010 | AtRLP41 (receptor like protein 41)                                                                               | -1.969 | 0.00371  |
| At3g25013 | Synaptobrevin family protein                                                                                     | 1.088  | 1.46E-06 |
| At3g25070 | RIN4 (RPM1 interacting protein 4); Encodes a member of the R protein complex and may represent a virulenc        | 1.12   | 1.06E-07 |
| At3g25110 | AtFaTA (fatA acyl-ACP thioesterase); Encodes a FatA acyl-ACP thioesterase                                        | 1.984  | 1.29E-08 |
| At3g25130 | unknown protein                                                                                                  | -1.557 | 3.68E-07 |
| At3g25180 | CYP82G1 (cytochrome P450, family 82, subfamily G, polypeptide 1); member of CYP82G                               | -1.789 | 0.00295  |
| At3g25230 | FKBP62 (FK506 BINDING PROTEIN 62); Encodes a a high molecular weight member of the FK506 binding                 | 3.28   | 2.90E-11 |
| At3g25250 | OXII (oxidative signal-inducible1); Arabidopsis protein kinase                                                   | 4.596  | 5.17E-11 |
| At3g25560 | NIK2 (NSP-interacting kinase 2)                                                                                  | -1.124 | 8.17E-08 |
| At3g25570 | Adenosylmethionine decarboxylase family protein                                                                  | -1.387 | 2.66E-06 |
| At3g25610 | ATPase E1-E2 type family protein / haloacid dehalogenase-like hydrolase family protein                           | 2.006  | 2.09E-07 |
| At3g25690 | CHUP1 (CHLOROPLAST UNUSUAL POSITIONING 1); actin binding protein required for normal chloropla                   | -1.425 | 3.80E-07 |
| At3g25710 | BHLH32 (basic helix-loop-helix 32); Encodes a basic helix-loop-helix transcription factor that is expressed i    | -1.24  | 2.39E-06 |
| At3g25717 | DVL6 (DEVIL 6)                                                                                                   | -1.746 | 7.45E-09 |
| At3g25760 | AOC1 (allene oxide cyclase 1); encodes allene oxide cyclase. One of four genes in Arabidopsis that encode th     | -1.335 | 0.0005   |
| At3g25790 | myb-like transcription factor family protein                                                                     | -2.76  | 3.55E-05 |
| At3g25990 | Homeodomain-like superfamily protein                                                                             | 1.834  | 2.83E-10 |
| At3g26020 | Protein phosphatase 2A regulatory B subunit family protein; Encodes protein phosphatase 2A (PP2A) B'eta sul      | 1.588  | 6.17E-09 |
| At3g26040 | HXXXD-type acyl-transferase family protein                                                                       | 2.753  | 3.22E-10 |
| At3g26050 | TPX2 (targeting protein for Xklp2) protein family                                                                | 1.02   | 2.60E-06 |
| At3g26165 | CYP71B18 (cytochrome P450, family 71, subfamily B, polypeptide 18); putative cytochrome P450.                    | -1.3   | 4.75E-06 |
| At3g26190 | CYP71B21 (cytochrome P450, family 71, subfamily B, polypeptide 21); putative cytochrome P450                     | 1.681  | 3.64E-08 |
| At3g26235 | unknown protein                                                                                                  | -1.036 | 3.01E-05 |
| At3g26280 | CYP71B4 (cytochrome P450, family 71, subfamily B, polypeptide 4); cytochrome P450 monooxygenase                  | -2.484 | 9.66E-08 |
| At3g26295 | CYP71B33 (cytochrome P450, family 71, subfamily B, polypeptide 33); putative cytochrome P450.                    | 2.961  | 2.94E-06 |
| At3g26500 | PIRL2 (plant intracellular ras group-related LRR 2); Encodes PIRL2, a member of the Plant Intracellular Ras-g    | 2.018  | 3.13E-09 |
| At3g26510 | Octicosapeptide/Phox/Bem1p family protein                                                                        | 1.116  | 0.0245   |
| At3g26520 | SITIP (SALT-STRESS INDUCIBLE TONOPLAST INTRINSIC PROTEIN); gamma tonoplast intrinsic protei                      | -1.18  | 0.0003   |
| At3g26580 | Tetratricopeptide repeat (TPR)-like superfamily protein                                                          | -1.129 | 1.13E-06 |
| At3g26610 | Pectin lyase-like superfamily protein                                                                            | 1.005  | 2.66E-05 |
| At3g26620 | LBD23 (LOB domain-containing protein 23)                                                                         | 3.056  | 3.22E-11 |
| At3g26680 | ATSNM1 (SENSITIVE TO NITROGEN MUSTARD 1); involved in a SNM-dependent recombinational repai                      | 1.109  | 5.19E-07 |
| At3g26690 | ATNUDT13 (ARABIDOPSIS THALIANA NUDIX HYDROLASE HOMOLOG 13); Encodes AtNUDT13, a r                                | 1.229  | 1.00E-07 |
| At3g26740 | CCL (CCR-like); transcripts are differentially regulated at the level of mRNA stability at different times of da | -2.466 | 7.44E-08 |
| At3g26760 | NAD(P)-binding Rossmann-fold superfamily protein                                                                 | -1.371 | 1.50E-05 |
| At3g26830 | PAD3 (PHYTOALEXIN DEFICIENT 3); Mutations in pad3 are defective in biosynthesis of the indole derived            | 2.027  | 0.00986  |
| At3g26910 | hydroxyproline-rich glycoprotein family protein                                                                  | 2.89   | 5.58E-09 |



|           |                                                                                                                 |        |          |
|-----------|-----------------------------------------------------------------------------------------------------------------|--------|----------|
| At3g26980 | MUB4 (membrane-anchored ubiquitin-fold protein 4 precursor)                                                     | 2.248  | 4.20E-11 |
| At3g27025 | unknown protein                                                                                                 | 1.505  | 6.18E-06 |
| At3g27030 | unknown protein                                                                                                 | -1.253 | 1.08E-07 |
| At3g27070 | TOM20-1 (translocase outer membrane 20-1); Form of TOM20, which is a component of the TOM complex, i            | 1.375  | 2.21E-07 |
| At3g27210 | unknown protein                                                                                                 | -1.657 | 1.23E-07 |
| At3g27360 | Histone superfamily protein                                                                                     | -1.062 | 2.68E-05 |
| At3g27400 | Pectin lyase-like superfamily protein                                                                           | -1.107 | 5.57E-05 |
| At3g27440 | UKL5 (uridine kinase-like 5); One of the homologous genes predicted to encode proteins with UPRT domains        | 1.622  | 1.81E-06 |
| At3g27500 | Cysteine/Histidine-rich C1 domain family protein                                                                | -1.701 | 6.67E-07 |
| At3g27540 | beta-1,4-N-acetylglucosaminyltransferase family protein                                                         | -1.182 | 1.48E-05 |
| At3g27550 | RNA-binding CRS1 / YhbY (CRM) domain protein                                                                    | 1.478  | 1.62E-07 |
| At3g27570 | Sucrase/ferredoxin-like family protein                                                                          | 1.082  | 4.01E-07 |
| At3g27600 | SWAP (Suppressor-of-White-APricot)/surp RNA-binding domain-containing protein                                   | 1.73   | 2.30E-07 |
| At3g27920 | ATMYB0 (myb domain protein 0); Encodes a Myb-like protein that is required for induction of trichome deve       | 1.084  | 0.00056  |
| At3g27930 | unknown protein                                                                                                 | 1.741  | 1.89E-08 |
| At3g27960 | Tetratricopeptide repeat (TPR)-like superfamily protein                                                         | -1.06  | 9.86E-07 |
| At3g27997 | expressed protein; pseudogene of unknown protein                                                                | 1.637  | 4.74E-06 |
| At3g28060 | Nodulin MtN21 /EamA-like transporter family protein                                                             | -1.087 | 8.55E-06 |
| At3g28070 | nodulin MtN21 /EamA-like transporter family protein                                                             | -1.342 | 7.59E-06 |
| At3g28130 | nodulin MtN21 /EamA-like transporter family protein                                                             | -1.2   | 2.48E-07 |
| At3g28180 | ATCSLC04 (Cellulose-synthase-like C4); encodes a gene similar to cellulose synthase                             | -1.376 | 1.75E-06 |
| At3g28210 | SAP12 (STRESS-ASSOCIATED PROTEIN 12); Encodes a putative zinc finger protein (PMZ).                             | 5.755  | 2.79E-09 |
| At3g28220 | TRAF-like family protein                                                                                        | 1.217  | 0.00474  |
| At3g28270 | Protein of unknown function (DUF677)                                                                            | 1.841  | 7.84E-05 |
| At3g28290 | AT14A (Protein of unknown function (DUF677)); Encodes a protein with sequence similarity to integrins. Loc      | -1.477 | 0.00017  |
| At3g28310 | Protein of unknown function (DUF677)                                                                            | -1.016 | 5.75E-07 |
| At3g28340 | GATL10 (galacturonosyltransferase-like 10); Encodes a protein with putative galacturonosyltransferase activi    | 1.237  | 0.0042   |
| At3g28350 | similar to unknown protein [Arabidopsis thaliana] (TAIR:AT3G28370.1); similar to hypothetical protein OsL_      | 1.162  | 5.56E-06 |
| At3g28420 | Putative membrane lipoprotein                                                                                   | -1.091 | 2.39E-05 |
| At3g28510 | P-loop containing nucleoside triphosphate hydrolases superfamily protein                                        | -3.344 | 0.00036  |
| At3g28540 | P-loop containing nucleoside triphosphate hydrolases superfamily protein                                        | -2.162 | 0.0002   |
| At3g28740 | CYP81D1 (Cytochrome P450 superfamily protein); Encodes a member of the cytochrome p450 family. Expres           | 3.525  | 1.85E-09 |
| At3g28850 | Glutaredoxin family protein                                                                                     | 1.137  | 1.15E-07 |
| At3g28860 | ABCB19 (ATP binding cassette subfamily B19); Belongs to the family of ATP-binding cassette (ABC) transp         | -1.068 | 1.50E-06 |
| At3g28910 | MYB30 (myb domain protein 30); transcription factor myb homologue                                               | -1.602 | 8.80E-08 |
| At3g28920 | AtHB34 (homeobox protein 34)                                                                                    | -1.198 | 9.56E-08 |
| At3g28930 | AIG2 (AVRRPT2-INDUCED GENE 2); avrRpt2-induced gene that exhibits RPS2- and avrRpt2-dependent in                | 1.157  | 4.26E-06 |
| At3g28960 | Transmembrane amino acid transporter family protein                                                             | -2.505 | 5.46E-10 |
| At3g29000 | Calcium-binding EF-hand family protein                                                                          | 2.064  | 5.06E-08 |
| At3g29030 | ATEXP5 (ARABIDOPSIS THALIANA EXPANSIN 5); Encodes an expansin. Naming convention from the E:                    | -1.109 | 0.0003   |
| At3g29035 | ANAC059 (Arabidopsis NAC domain containing protein 59); Encodes a protein with transcription factor activ       | -1.129 | 0.0001   |
| At3g29250 | NAD(P)-binding Rossmann-fold superfamily protein                                                                | -2.039 | 0.02221  |
| At3g29252 | pseudogene of short-chain dehydrogenase/reductase (SDR) family; pseudogene of short-chain dehydrogenase/        | -1.222 | 0.00897  |
| At3g29320 | Glycosyl transferase, family 35; Encodes a plastidic alpha-glucan phosphorylase. In vitro, the enzyme has a pr  | -1.308 | 5.06E-07 |
| At3g29370 | unknown protein                                                                                                 | -1.884 | 8.54E-06 |
| At3g29810 | COBL2 (COBRA-like protein 2 precursor)                                                                          | 1.665  | 2.42E-08 |
| At3g29970 | B12D protein                                                                                                    | 1.518  | 0.01183  |
| At3g30122 | expressed protein; pseudogene similar to peptide chain release factor protein                                   | 1.099  | 0.0065   |
| At3g30720 | QQS (QUA-QUINE STARCH)                                                                                          | -1.084 | 0.00221  |
| At3g30725 | AtGDU6 (glutamine dumper 6); Encodes a member of the GDU (glutamine dumper) family proteins involved            | -1.382 | 0.00181  |
| At3g32966 | pseudogene, hypothetical protein (transposable element gene)                                                    | 1.819  | 2.78E-08 |
| At3g32990 | pseudogene, ATP synthase C subunit, blastp match of 86% identity and 9.3e-27 P-value to SP P06286 ATPH_         | -1.19  | 0.00073  |
| At3g42130 | glycine-rich protein                                                                                            | -1.255 | 0.0001   |
| At3g42800 | unknown protein                                                                                                 | -2.65  | 5.39E-08 |
| At3g42850 | Mevalonate/galactokinase family protein                                                                         | -1.55  | 0.00116  |
| At3g43110 | unknown protein                                                                                                 | -2.575 | 0.00044  |
| At3g43160 | MEE38 (maternal effect embryo arrest 38)                                                                        | 3.902  | 0.0218   |
| At3g43250 | Family of unknown function (DUF572)                                                                             | 2.13   | 3.14E-06 |
| At3g43430 | RING/U-box superfamily protein                                                                                  | -1.5   | 1.00E-07 |
| At3g43670 | Copper amine oxidase family protein                                                                             | -2.375 | 2.17E-09 |
| At3g43720 | Bifunctional inhibitor/lipid-transfer protein/seed storage 2S albumin superfamily protein                       | -1.179 | 3.06E-06 |
| At3g43790 | ZIFL2 (zinc induced facilitator-like 2)                                                                         | -1.255 | 7.37E-07 |
| At3g44110 | ATJ3 (DNAJ homologue 3); homologous to the co-chaperon DNAJ protein from E coli                                 | 2.04   | 2.88E-09 |
| At3g44120 | F-box and associated interaction domains-containing protein                                                     | -1.083 | 2.66E-06 |
| At3g44190 | FAD/NAD(P)-binding oxidoreductase family protein                                                                | 2.558  | 1.07E-09 |
| At3g44260 | Polynucleotidyl transferase, ribonuclease H-like superfamily protein                                            | -1.769 | 3.92E-07 |
| At3g44300 | AtNIT2 (nitrilase 2); Encodes an enzyme that catalyzes the hydrolysis of indole-3-acetonitrile (IAN) to indole- | 1.062  | 0.0272   |

|           |                                                                                                               |        |          |
|-----------|---------------------------------------------------------------------------------------------------------------|--------|----------|
| At3g44320 | AtNIT3 (NITRILASE 3); This enzyme catalyzes the hydrolysis of indole-3-acetonitrile (IAN) to indole-3-aceti   | 1.149  | 3.52E-07 |
| At3g44400 | Disease resistance protein (TIR-NBS-LRR class) family                                                         | 1.12   | 3.33E-05 |
| At3g44420 | pseudogene, hypothetical protein (transposable element gene)                                                  | -1.207 | 2.81E-08 |
| At3g44470 | transposable element gene                                                                                     | 2.106  | 1.76E-08 |
| At3g44510 | alpha/beta-Hydrolases superfamily protein                                                                     | -1.618 | 0.0004   |
| At3g44630 | Disease resistance protein (TIR-NBS-LRR class) family                                                         | 1.653  | 8.28E-07 |
| At3g44716 | unknown protein                                                                                               | 1.27   | 1.80E-05 |
| At3g44820 | Phototropic-responsive NPH3 family protein                                                                    | -1.258 | 1.26E-06 |
| At3g44830 | Lecithin:cholesterol acyltransferase family protein                                                           | 2.036  | 3.72E-05 |
| At3g45040 | phosphatidate cytidyltransferase family protein; Encodes a putative dolichol kinase.                          | 1.424  | 1.42E-08 |
| At3g45160 | Putative membrane lipoprotein                                                                                 | -1.181 | 9.03E-06 |
| At3g45230 | hydroxyproline-rich glycoprotein family protein                                                               | -1.001 | 5.71E-07 |
| At3g45260 | C2H2-like zinc finger protein                                                                                 | -1.307 | 1.08E-07 |
| At3g45640 | ATMPK3 (mitogen-activated protein kinase 3); Encodes a mitogen-activated kinase whose mRNA levels incre       | 1.191  | 0.00017  |
| At3g45680 | Major facilitator superfamily protein                                                                         | 1.082  | 3.41E-06 |
| At3g45780 | NPH1 (NONPHOTOTROPIC HYPOCOTYL 1); Blue-light photoreceptor. Contains a light activated serine-thi            | -1.344 | 2.90E-05 |
| At3g45850 | P-loop containing nucleoside triphosphate hydrolases superfamily protein                                      | -1.025 | 7.60E-08 |
| At3g45860 | CRK4 (cysteine-rich RLK (RECEPTOR-like protein kinase) 4); Encodes a cysteine-rich receptor-like protein k    | -2.203 | 0.0002   |
| At3g45930 | Histone superfamily protein                                                                                   | -1.073 | 3.23E-05 |
| At3g45940 | Glycosyl hydrolases family 31 protein                                                                         | -1.61  | 4.85E-06 |
| At3g45960 | ATEXLA3 (expansin-like A3); member of EXPANSIN-LIKE. Naming convention from the Expansin Working              | -1.432 | 0.0002   |
| At3g45970 | ATEXLA1 (expansin-like A1); member of EXPANSIN-LIKE. Naming convention from the Expansin Working              | -1.853 | 6.48E-05 |
| At3g46020 | RNA-binding (RRM/RBD/RNP motifs) family protein                                                               | 1.034  | 0.0017   |
| At3g46070 | C2H2-type zinc finger family protein                                                                          | 3.415  | 8.79E-09 |
| At3g46080 | C2H2-type zinc finger family protein                                                                          | 3.049  | 0.00047  |
| At3g46090 | ZAT7 (C2H2 and C2HC zinc fingers superfamily protein)                                                         | 3.989  | 1.14E-05 |
| At3g46110 | LOCATED IN: plasma membrane (Domain of unknown function (DUF966))                                             | 2.002  | 2.21E-07 |
| At3g46120 | ATPAP19 (PURPLE ACID PHOSPHATASE 19)                                                                          | -1.622 | 0.00106  |
| At3g46200 | aTNUDT9 (nudix hydrolase homolog 9)                                                                           | 1.928  | 2.42E-10 |
| At3g46230 | ATHSP17.4 (ARABIDOPSIS THALIANA HEAT SHOCK PROTEIN 17.4); member of the class I small heat-                   | 9.907  | 4.18E-12 |
| At3g46280 | protein kinase-related                                                                                        | -1.675 | 0.00437  |
| At3g46300 | unknown protein                                                                                               | -1.086 | 0.00211  |
| At3g46320 | Histone superfamily protein                                                                                   | -1.306 | 3.89E-06 |
| At3g46640 | LUX (LUX ARRHYTHMO); Encodes a myb family transcription factor with a single Myb DNA-binding dom              | -1.434 | 2.76E-07 |
| At3g46658 | other RNA; Potential natural antisense gene, locus overlaps with AT3G46660                                    | -1.106 | 3.19E-06 |
| At3g46730 | NB-ARC domain-containing disease resistance protein                                                           | 1.406  | 2.49E-06 |
| At3g46750 | unknown protein                                                                                               | 1.227  | 1.12E-05 |
| At3g46870 | Pentatricopeptide repeat (PPR) superfamily protein                                                            | 2.061  | 2.58E-09 |
| At3g46880 | unknown protein                                                                                               | -1.39  | 4.40E-05 |
| At3g46930 | Protein kinase superfamily protein                                                                            | 2.077  | 6.77E-09 |
| At3g46970 | ATPHS2 (ALPHA-GLUCAN PHOSPHORYLASE 2); Encodes a cytosolic alpha-glucan phosphorylase. In vitu                | -1.663 | 4.89E-07 |
| At3g47380 | Plant invertase/pectin methylesterase inhibitor superfamily protein                                           | -1.04  | 3.55E-06 |
| At3g47480 | Calcium-binding EF-hand family protein                                                                        | -2.091 | 0.00431  |
| At3g47510 | unknown protein                                                                                               | -1.316 | 8.80E-06 |
| At3g47550 | RING/FYVE/PHD zinc finger superfamily protein                                                                 | 2.14   | 3.98E-10 |
| At3g47570 | Leucine-rich repeat protein kinase family protein                                                             | -1.008 | 1.01E-06 |
| At3g47600 | ATMYB94 (myb domain protein 94); Encodes a putative transcription factor (MYB94).                             | -1.16  | 1.39E-06 |
| At3g47730 | ABCA2 (ATP-binding cassette A2); member of ATH subfamily                                                      | 1.16   | 5.08E-07 |
| At3g47780 | ATATH6 (A. THALIANA ABC2 HOMOLOG 6); member of ATH subfamily                                                  | 1.63   | 7.33E-06 |
| At3g47800 | Galactose mutarotase-like superfamily protein                                                                 | -1.342 | 1.06E-05 |
| At3g47820 | PUB39 (PLANT U-BOX 39)                                                                                        | 1.418  | 2.98E-07 |
| At3g47850 | unknown protein                                                                                               | 1.115  | 5.71E-07 |
| At3g47980 | Integral membrane HPP family protein                                                                          | -1.359 | 2.77E-06 |
| At3g48070 | RING/U-box superfamily protein                                                                                | 2.17   | 1.39E-09 |
| At3g48080 | alpha/beta-Hydrolases superfamily protein                                                                     | -1.704 | 0.00183  |
| At3g48100 | ARR5 (response regulator 5); Encodes a transcription repressor that mediates a negative feedback loop in cyto | -1.033 | 1.64E-05 |
| At3g48240 | Octicosapeptide/Phox/Bem1p family protein                                                                     | 3.752  | 8.37E-12 |
| At3g48260 | WNK3 (with no lysine (K) kinase 3); Encodes a member of the WNK family (9 members in all) of protein kin      | -1.826 | 1.52E-08 |
| At3g48360 | BT2 (BTB and TAZ domain protein 2); encodes a protein (BT2) that is an essential component of the TAC1-n      | -3.762 | 1.07E-08 |
| At3g48410 | alpha/beta-Hydrolases superfamily protein                                                                     | -1.05  | 2.11E-06 |
| At3g48490 | unknown protein                                                                                               | -1.171 | 1.06E-05 |
| At3g48640 | unknown protein                                                                                               | 3.071  | 0.0006   |
| At3g48650 | pseudogene, At14a-related protein, similar to At14a (GI:11994571 and GI:11994573) (Arabidopsis thaliana)      | 3.733  | 1.70E-06 |
| At3g48720 | HXXXD-type acyl-transferase family protein                                                                    | -2.366 | 1.29E-06 |
| At3g48740 | Nodulin MtN3 family protein                                                                                   | -1.854 | 3.82E-06 |
| At3g48790 | Pyridoxal phosphate (PLP)-dependent transferases superfamily protein                                          | 3.555  | 3.07E-09 |
| At3g48840 | RNA-binding (RRM/RBD/RNP motifs) family protein                                                               | 1.162  | 5.22E-07 |

|           |                                                                                                                                             |        |          |
|-----------|---------------------------------------------------------------------------------------------------------------------------------------------|--------|----------|
| At3g48970 | Heavy metal transport/detoxification superfamily protein                                                                                    | -1.923 | 1.60E-08 |
| At3g49055 | unknown protein                                                                                                                             | 2.366  | 7.95E-10 |
| At3g49160 | pyruvate kinase family protein; Expression of the gene is downregulated in the presence of paraquat, an induce                              | 1.892  | 2.79E-08 |
| At3g49260 | iqd21 (IQ-domain 21)                                                                                                                        | -1.023 | 1.75E-05 |
| At3g49380 | iqd15 (IQ-domain 15)                                                                                                                        | 4.054  | 8.80E-11 |
| At3g49530 | ANAC062 (NAC domain containing protein 62); Transcription factor that serves as a molecular link between c                                  | 1.658  | 1.39E-08 |
| At3g49540 | unknown protein                                                                                                                             | 4.007  | 6.08E-10 |
| At3g49570 | LSU3 (RESPONSE TO LOW SULFUR 3)                                                                                                             | 4.483  | 7.67E-10 |
| At3g49580 | LSU1 (RESPONSE TO LOW SULFUR 1)                                                                                                             | 3.159  | 1.38E-07 |
| At3g49630 | 2-oxoglutarate (2OG) and Fe(II)-dependent oxygenase superfamily protein                                                                     | -2.589 | 5.26E-05 |
| At3g49670 | BAM2 (BARELY ANY MERISTEM 2); Encodes a CLAVATA1-related receptor kinase-like protein required                                              | -1.071 | 1.42E-05 |
| At3g49744 | unknown protein                                                                                                                             | 1.318  | 5.56E-07 |
| At3g49860 | ARLA1B (ADP-ribosylation factor-like A1B); A member of ARF-like GTPase family. A thaliana has 21 meml                                       | 1.738  | 4.89E-07 |
| At3g49870 | ARLA1C (ADP-ribosylation factor-like A1C); A member of ARF-like GTPase family. A thaliana has 21 meml                                       | 1.073  | 4.09E-06 |
| At3g49940 | LBD38 (LOB domain-containing protein 38)                                                                                                    | -1.397 | 4.79E-07 |
| At3g49970 | Phototropic-responsive NPH3 family protein                                                                                                  | -1.633 | 1.75E-07 |
| At3g50010 | Cysteine/Histidine-rich C1 domain family protein                                                                                            | -1.488 | 0.00019  |
| At3g50120 | Plant protein of unknown function (DUF247)                                                                                                  | -2.637 | 2.02E-10 |
| At3g50140 | Plant protein of unknown function (DUF247)                                                                                                  | -1.867 | 3.17E-09 |
| At3g50260 | CEJ1 (cooperatively regulated by ethylene and jasmonate 1); Encodes a member of the DREB subfamily A-5 c                                    | 1.608  | 5.77E-06 |
| At3g50270 | HXXXD-type acyl-transferase family protein                                                                                                  | -1.611 | 6.41E-09 |
| At3g50310 | MAPKKK20 (mitogen-activated protein kinase kinase kinase 20); member of MEKK subfamily                                                      | -1.669 | 7.34E-08 |
| At3g50340 | unknown protein                                                                                                                             | -1.137 | 3.23E-07 |
| At3g50450 | HR1 (homolog of RPW8 1); Homolog of RPW8                                                                                                    | -1.581 | 3.39E-07 |
| At3g50480 | HR4 (homolog of RPW8 4); Homolog of RPW8                                                                                                    | 1.101  | 0.0021   |
| At3g50570 | hydroxyproline-rich glycoprotein family protein                                                                                             | -1.426 | 3.01E-07 |
| At3g50700 | AtIDD2 (indeterminate(ID)-domain 2); zinc finger protein, similar to maize Indeterminate1 (ID1)                                             | -1.35  | 1.68E-06 |
| At3g50740 | UGT72E1 (UDP-glucosyl transferase 72E1); UGT72E1 is an UDPG:coniferyl alcohol glucosyltransferase whic                                      | -1.752 | 1.13E-06 |
| At3g50750 | BEH1 (BES1/BZR1 homolog 1)                                                                                                                  | -1.082 | 3.18E-07 |
| At3g50770 | CML41 (calmodulin-like 41)                                                                                                                  | -1.531 | 0.00724  |
| At3g50840 | Phototropic-responsive NPH3 family protein                                                                                                  | 1.538  | 4.64E-07 |
| At3g50850 | Putative methyltransferase family protein                                                                                                   | 1.6    | 3.50E-07 |
| At3g50910 | unknown protein                                                                                                                             | 2.692  | 5.24E-10 |
| At3g50930 | BCS1 (cytochrome BC1 synthesis)                                                                                                             | 1.011  | 0.0027   |
| At3g50940 | P-loop containing nucleoside triphosphate hydrolases superfamily protein                                                                    | 1.712  | 4.03E-07 |
| At3g50950 | ZAR1 (HOPZ-ACTIVATED RESISTANCE 1)                                                                                                          | 1.008  | 0.0005   |
| At3g51210 | P-loop containing nucleoside triphosphate hydrolases superfamily protein                                                                    | -1.098 | 0.00072  |
| At3g51240 | F3H (flavanone 3-hydroxylase); Encodes flavanone 3-hydroxylase that is coordinately expressed with chalcone                                 | 1.313  | 0.0008   |
| At3g51400 | Arabidopsis protein of unknown function (DUF241)                                                                                            | -1.764 | 7.94E-09 |
| At3g51470 | Protein phosphatase 2C family protein                                                                                                       | -1.073 | 1.53E-05 |
| At3g51520 | diacylglycerol acyltransferase family                                                                                                       | 1.097  | 2.13E-07 |
| At3g51600 | LTP5 (lipid transfer protein 5); Predicted to encode a PR (pathogenesis-related) protein. Belongs to the lipid tr                           | -1.33  | 1.49E-06 |
| At3g51660 | Tautomerase/MIF superfamily protein                                                                                                         | -1.062 | 3.79E-05 |
| At3g51710 | D-mannose binding lectin protein with Apple-like carbohydrate-binding domain                                                                | -1.434 | 1.10E-08 |
| At3g51790 | ATG1 (transmembrane protein G1P-related 1); putative transmembrane protein G1p (AtG1) mRNA, complete                                        | 1.012  | 2.48E-06 |
| At3g51860 | CAX3 (cation exchanger 3)                                                                                                                   | -1.025 | 0.04178  |
| At3g51890 | Clathrin light chain protein                                                                                                                | 1.967  | 1.25E-08 |
| At3g51910 | AT-HSFA7A (ARABIDOPSIS THALIANA HEAT SHOCK TRANSCRIPTION FACTOR A7A); member of                                                             | 2.992  | 4.62E-11 |
| At3g51920 | CAM9 (calmodulin 9); encodes a divergent member of calmodulin, which is an EF-hand family of Ca <sup>2+</sup> -bindi                        | 1.562  | 1.40E-07 |
| At3g52310 | ABC-2 type transporter family protein                                                                                                       | 3.226  | 1.40E-09 |
| At3g52360 | unknown protein                                                                                                                             | 2.166  | 5.94E-10 |
| At3g52400 | SYPI22 (syntaxin of plants 122); syntaxin protein, involved in the negative regulation of defense pathways suc                              | 3.849  | 7.97E-10 |
| At3g52430 | ATPAD4 (ARABIDOPSIS PHYTOALEXIN DEFICIENT 4); Encodes a lipase-like gene that is important for s                                            | 1.102  | 0.0269   |
| At3g52450 | PUB22 (plant U-box 22); Encodes a cytoplasmically localized U-box domain E3 ubiquitin ligase protein that i                                 | 1.308  | 2.61E-05 |
| At3g52720 | ACA1 (alpha carbonic anhydrase 1); Encodes a putative alpha carbonic anhydrase (CAH1) located in the chlor                                  | -1.721 | 2.57E-05 |
| At3g52800 | A20/AN1-like zinc finger family protein                                                                                                     | 1.605  | 9.58E-07 |
| At3g52840 | BGAL2 (beta-galactosidase 2)                                                                                                                | -1.459 | 1.57E-07 |
| At3g53000 | AtPP2-A15 (phloem protein 2-A15)                                                                                                            | 1.394  | 2.42E-08 |
| At3g53200 | AtMYB27 (myb domain protein 27); Member of the R2R3 factor gene family.                                                                     | 1.087  | 9.74E-07 |
| At3g53230 | ATPase, AAA-type, CDC48 protein                                                                                                             | 3.82   | 7.31E-12 |
| At3g53250 | SAUR-like auxin-responsive protein family                                                                                                   | -2.558 | 8.51E-08 |
| At3g53280 | CYP71B5 (cytochrome p450 71b5); cytochrome P450 monooxygenase                                                                               | 1.579  | 7.23E-08 |
| At3g53290 | CYP71B30P (cytochrome P450, family 71, subfamily B, polypeptide 30 pseudogene); missing N-term 80 AA                                        | 1.399  | 2.13E-08 |
| At3g53365 | Unknown gene; Unknown gene                                                                                                                  | -1.077 | 4.40E-05 |
| At3g53668 | CPuORF51 (conserved peptide upstream open reading frame 51); Upstream open reading frames (uORFs) are                                       | 1.003  | 7.00E-05 |
| At3g53720 | ATCHX20 (cation/H <sup>+</sup> exchanger 20); member of Putative Na <sup>+</sup> /H <sup>+</sup> antiporter family. Involved in the osmoreg | -1.711 | 2.98E-07 |
| At3g53800 | Fes1B (Fes1B); Encodes one of the Arabidopsis orthologs of the human Hsp70-binding protein 1 (HspBP-1) a                                    | -1.832 | 8.59E-08 |

|           |                                                                                                                          |        |          |
|-----------|--------------------------------------------------------------------------------------------------------------------------|--------|----------|
| At3g53810 | Concanavalin A-like lectin protein kinase family protein                                                                 | 1.643  | 6.06E-08 |
| At3g53830 | Regulator of chromosome condensation (RCC1) family protein                                                               | 4.108  | 8.39E-12 |
| At3g53850 | Uncharacterised protein family (UPF0497)                                                                                 | -1.016 | 4.14E-05 |
| At3g54030 | Protein kinase protein with tetratricopeptide repeat domain                                                              | -1.034 | 1.24E-07 |
| At3g54100 | O-fucosyltransferase family protein                                                                                      | 1.046  | 2.62E-07 |
| At3g54130 | Josephin family protein                                                                                                  | 2.143  | 6.66E-09 |
| At3g54150 | S-adenosyl-L-methionine-dependent methyltransferases superfamily protein                                                 | 2.531  | 9.64E-05 |
| At3g54160 | RNI-like superfamily protein                                                                                             | 1.605  | 6.99E-08 |
| At3g54260 | TBL36 (TRICHOME BIREFRINGENCE-LIKE 36); Encodes a member of the TBL (TRICHOME BIREFRINGENCE-LIKE) family                 | -1.204 | 3.04E-05 |
| At3g54320 | ASML1 (ACTIVATOR OF SPO(MIN)::LUC1); WRINKLED1 encodes transcription factor of the AP2/ERWE                              | 1.57   | 2.88E-07 |
| At3g54340 | AP3 (APETALA 3); Floral homeotic gene encoding a MADS domain protein homologous to SRF transcription factor              | -2.063 | 0.00032  |
| At3g54420 | ATCHITIV (CHITINASE CLASS IV); encodes an EP3 chitinase that is expressed during somatic embryogenesis                   | 1.686  | 1.65E-08 |
| At3g54500 | BEST Arabidopsis thaliana protein match is: dentin sialophosphoprotein-related (TAIR:AT5G64170.1)                        | 2.596  | 1.63E-08 |
| At3g54600 | Class I glutamine amidotransferase-like superfamily protein                                                              | -2.288 | 1.14E-07 |
| At3g54620 | ATBZIP25 (ARABIDOPSIS THALIANA BASIC LEUCINE ZIPPER 25); bZIP transcription factor-like protein                          | 1.344  | 7.15E-09 |
| At3g54700 | PHT1.7 (phosphate transporter 1.7); Encodes Pht1;7, a member of the Pht1 family of phosphate transporters                | -1.18  | 0.02308  |
| At3g54780 | Zinc finger (C3HC4-type RING finger) family protein                                                                      | -1.431 | 3.96E-08 |
| At3g54830 | Transmembrane amino acid transporter family protein                                                                      | -1.574 | 2.34E-05 |
| At3g55240 | Plant protein 1589 of unknown function; Overexpression leads to PEL (Pseudo-Etiolation in Light) phenotype.              | -1.997 | 5.51E-06 |
| At3g55420 | unknown protein                                                                                                          | -1.05  | 5.10E-05 |
| At3g55470 | Calcium-dependent lipid-binding (CaLB domain) family protein                                                             | 1.906  | 3.21E-10 |
| At3g55550 | Concanavalin A-like lectin protein kinase family protein                                                                 | 1.041  | 0.00043  |
| At3g55580 | Regulator of chromosome condensation (RCC1) family protein                                                               | 2      | 1.64E-08 |
| At3g55700 | UDP-Glycosyltransferase superfamily protein                                                                              | 1.591  | 4.70E-07 |
| At3g55760 | unknown protein                                                                                                          | -1.15  | 1.96E-07 |
| At3g55840 | Hs1pro-1 protein                                                                                                         | 2.319  | 3.12E-07 |
| At3g56040 | UGP3 (UDP-glucose pyrophosphorylase 3)                                                                                   | -1.676 | 3.10E-06 |
| At3g56200 | Transmembrane amino acid transporter family protein; Encodes a putative amino acid transporter.                          | 2.556  | 1.87E-09 |
| At3g56250 | unknown protein                                                                                                          | 3.028  | 7.34E-11 |
| At3g56275 | expressed protein; pseudogene of unknown protein                                                                         | 2.185  | 4.50E-05 |
| At3g56290 | unknown protein                                                                                                          | 3.246  | 2.17E-09 |
| At3g56380 | ARR17 (response regulator 17); response regulator 17                                                                     | -1.649 | 1.98E-06 |
| At3g56500 | serine-rich protein-related                                                                                              | 2.002  | 5.99E-10 |
| At3g56600 | Protein kinase superfamily protein                                                                                       | 2.223  | 0.0191   |
| At3g56710 | SIB1 (sigma factor binding protein 1); Sig1 binding protein; interacts with Sig1R4. As well as Sig1, Sib1 is involved in | 2.941  | 1.94E-08 |
| At3g56730 | Putative endonuclease or glycosyl hydrolase                                                                              | 2.101  | 2.65E-10 |
| At3g56740 | Ubiquitin-associated (UBA) protein                                                                                       | 1.114  | 2.53E-06 |
| At3g56970 | ORG2 (OBP3-RESPONSIVE GENE 3); Encodes a member of the basic helix-loop-helix transcription factor family                | 1.21   | 0.02598  |
| At3g56980 | ORG3 (OBP3-RESPONSIVE GENE 3); Encodes a member of the basic helix-loop-helix transcription factor family                | 1.591  | 0.02086  |
| At3g57010 | Calcium-dependent phosphotriesterase superfamily protein                                                                 | 1.369  | 7.45E-07 |
| At3g57157 | other RNA                                                                                                                | -2.878 | 1.89E-05 |
| At3g57280 | Transmembrane proteins 14C                                                                                               | 1.012  | 8.01E-06 |
| At3g57370 | Cyclin family protein                                                                                                    | 1.715  | 1.26E-07 |
| At3g57380 | Glycosyltransferase family 61 protein                                                                                    | 2.878  | 9.99E-10 |
| At3g57430 | OTP84 (ORGANELLE TRANSCRIPT PROCESSING 84); Encodes a chloroplast RNA editing factor.                                    | -1.121 | 1.23E-06 |
| At3g57450 | unknown protein                                                                                                          | 1.574  | 4.43E-07 |
| At3g57480 | zinc finger (C2H2 type, AN1-like) family protein                                                                         | 1.407  | 2.31E-08 |
| At3g57530 | CPK32 (calcium-dependent protein kinase 32); Calcium-dependent Protein Kinase. ABA signaling component                   | 2.917  | 3.89E-10 |
| At3g57550 | AGK2 (guanylate kinase); guanylate kinase                                                                                | 1.437  | 5.05E-05 |
| At3g57640 | Protein kinase superfamily protein                                                                                       | 1.549  | 2.25E-07 |
| At3g57700 | Protein kinase superfamily protein                                                                                       | 1.05   | 0.0002   |
| At3g57730 | Protein kinase superfamily protein                                                                                       | 1.331  | 1.41E-06 |
| At3g57740 | Protein kinase superfamily protein                                                                                       | 2.139  | 3.17E-09 |
| At3g57760 | Protein kinase superfamily protein                                                                                       | 1.035  | 3.93E-06 |
| At3g57790 | Pectin lyase-like superfamily protein                                                                                    | -1.204 | 3.82E-07 |
| At3g57810 | Cysteine proteinases superfamily protein                                                                                 | 1.903  | 1.83E-09 |
| At3g57880 | Calcium-dependent lipid-binding (CaLB domain) plant phosphoribosyltransferase family protein                             | 2.422  | 1.15E-09 |
| At3g58000 | VQ motif-containing protein                                                                                              | 1.25   | 1.49E-06 |
| At3g58070 | GIS (GLABROUS INFLORESCENCE STEMS); Putative transcription factor, contains C2H2 domain, regulates                       | -1.101 | 1.72E-07 |
| At3g58490 | Phosphatidic acid phosphatase (PAP2) family protein                                                                      | 2.387  | 1.10E-09 |
| At3g58600 | Adaptin ear-binding coat-associated protein 1 NECAP-1                                                                    | 1.064  | 2.53E-06 |
| At3g58850 | PAR2 (PHY RAPIDLY REGULATED 2); Encodes PHYTOCHROME RAPIDLY REGULATED2 (PAR2), a                                         | -1.808 | 1.89E-07 |
| At3g58860 | F-box/RNI-like superfamily protein                                                                                       | -1.039 | 4.39E-05 |
| At3g58990 | IPMI1 (isopropylmalate isomerase 1)                                                                                      | -4.127 | 8.42E-11 |
| At3g59150 | F-box/RNI-like superfamily protein                                                                                       | 2.149  | 5.53E-10 |
| At3g59250 | F-box/RNI-like superfamily protein                                                                                       | -1.562 | 8.70E-07 |
| At3g59270 | FBD-like domain family protein                                                                                           | 3.355  | 3.22E-10 |

|           |                                                                                                               |        |          |
|-----------|---------------------------------------------------------------------------------------------------------------|--------|----------|
| At3g59280 | TXR1 (THAXTOMIN A RESISTANT 1); mutant exhibited resistance to growth on media containing thaxtom             | 1.939  | 2.43E-10 |
| At3g59290 | ENTH/VHS family protein                                                                                       | 1.173  | 6.33E-06 |
| At3g59430 | unknown protein                                                                                               | 2.451  | 0.0104   |
| At3g59520 | ATRBL13 (RHOMBOID-like protein 13)                                                                            | 2.896  | 2.24E-10 |
| At3g59530 | LAP3 (LESS ADHERENT POLLEN 3)                                                                                 | 4.494  | 2.61E-12 |
| At3g59580 | Plant regulator RWP-RK family protein                                                                         | -1.298 | 2.81E-06 |
| At3g59710 | NAD(P)-binding Rossmann-fold superfamily protein                                                              | -1     | 1.30E-05 |
| At3g59820 | LETM1-like protein                                                                                            | -1.034 | 1.96E-05 |
| At3g59880 | unknown protein                                                                                               | 2.208  | 7.46E-08 |
| At3g59900 | ARGOS (AUXIN-REGULATED GENE INVOLVED IN ORGAN SIZE); Encodes ARGOS (Auxin-Regulated                           | -1.577 | 4.74E-08 |
| At3g59940 | Galactose oxidase/kelch repeat superfamily protein                                                            | -1.421 | 6.71E-07 |
| At3g60010 | ASK13 (SKP1-like 13)                                                                                          | 1.542  | 1.39E-05 |
| At3g60140 | BGLU30 (BETA GLUCOSIDASE 30); Encodes a protein similar to beta-glucosidase and is a member of glyco          | 4.68   | 1.07E-05 |
| At3g60176 | other RNA                                                                                                     | 1.368  | 1.74E-05 |
| At3g60250 | CKB3 (casein kinase II beta chain 3); Regulatory (beta) subunit of the protein kinase CK2. Involved in regula | 1.03   | 1.14E-06 |
| At3g60290 | 2-oxoglutarate (2OG) and Fe(II)-dependent oxygenase superfamily protein                                       | -2.262 | 2.60E-07 |
| At3g60530 | GATA4 (GATA transcription factor 4); Encodes a member of the GATA factor family of zinc finger transcript     | -1.129 | 8.08E-06 |
| At3g60630 | ATHAM2 (ARABIDOPSIS THALIANA HAIRY MERISTEM 2)                                                                | -1.047 | 5.65E-07 |
| At3g60650 | unknown protein                                                                                               | -1.266 | 0.0007   |
| At3g60700 | Protein of unknown function (DUF1163)                                                                         | -1.171 | 0.00037  |
| At3g61060 | AtPP2-A13 (phloem protein 2-A13)                                                                              | -1.133 | 0.0002   |
| At3g61090 | Putative endonuclease or glycosyl hydrolase                                                                   | 1.482  | 1.16E-09 |
| At3g61111 | Zinc-binding ribosomal protein family protein                                                                 | 4.063  | 1.09E-08 |
| At3g61190 | BAP1 (BON association protein 1); Encodes a protein with a C2 domain that binds to BON1 in yeast two hybr     | 1.89   | 0.00047  |
| At3g61210 | S-adenosyl-L-methionine-dependent methyltransferases superfamily protein                                      | -1.327 | 2.22E-07 |
| At3g61220 | NAD(P)-binding Rossmann-fold superfamily protein                                                              | 1.313  | 2.77E-07 |
| At3g61280 | Arabidopsis thaliana protein of unknown function (DUF821)                                                     | -1.01  | 0.0001   |
| At3g61320 | Bestrophin-like protein                                                                                       | 1.778  | 1.90E-07 |
| At3g61410 | BEST Arabidopsis thaliana protein match is: U-box domain-containing protein kinase family protein (TAIR:A     | -1.432 | 0.00119  |
| At3g61520 | Pentatricopeptide repeat (PPR) superfamily protein                                                            | -1.127 | 6.03E-07 |
| At3g61550 | RING/U-box superfamily protein                                                                                | -1.021 | 2.75E-07 |
| At3g61630 | CRF6 (cytokinin response factor 6); CRF6 encodes one of the six cytokinin response factors. CRF5 belongs to   | 2.107  | 1.57E-08 |
| At3g61678 | unknown protein                                                                                               | -1.197 | 8.98E-06 |
| At3g61760 | ADL1B (DYNAMIN-like 1B)                                                                                       | 1.741  | 8.93E-09 |
| At3g61880 | CYP78A9 (cytochrome p450 78a9); Encodes a cytochrome p450 monooxygenase. Overexpression of this gen           | -1.123 | 1.74E-06 |
| At3g61920 | unknown protein                                                                                               | -1.344 | 1.49E-08 |
| At3g61930 | unknown protein                                                                                               | -1.247 | 0.0031   |
| At3g62040 | Haloacid dehalogenase-like hydrolase (HAD) superfamily protein                                                | -1.344 | 7.19E-06 |
| At3g62090 | PIF6 (PHYTOCHROME-INTERACTING FACTOR 6); encodes a novel Myc-related bHLH transcription fact                  | -1.147 | 1.13E-06 |
| At3g62110 | Pectin lyase-like superfamily protein                                                                         | -1.167 | 1.46E-06 |
| At3g62150 | PGP21 (P-glycoprotein 21)                                                                                     | 1.041  | 1.35E-06 |
| At3g62260 | Protein phosphatase 2C family protein                                                                         | 5.3    | 1.96E-12 |
| At3g62320 | Polynucleotidyl transferase, ribonuclease H-like superfamily protein                                          | 1.065  | 6.27E-05 |
| At3g62340 | WRKY68 (WRKY family transcription factor); member of WRKY Transcription Factor; Group II-c                    | 2.352  | 2.83E-06 |
| At3g62350 | BEST Arabidopsis thaliana protein match is: F-box family protein (TAIR:AT1G71320.1)                           | 1.506  | 1.48E-06 |
| At3g62510 | protein disulfide isomerase-related                                                                           | -1.115 | 9.27E-06 |
| At3g62550 | Adenine nucleotide alpha hydrolases-like superfamily protein                                                  | -2.586 | 3.27E-08 |
| At3g62630 | Protein of unknown function (DUF1645)                                                                         | -1.302 | 2.90E-07 |
| At3g62660 | GATL7 (galacturonosyltransferase-like 7); Encodes a protein with putative galacturonosyltransferase activity. | -1.583 | 1.34E-07 |
| At3g62690 | ATL5 (AtL5); Encodes a RING-H2 zinc finger protein related to ATL2. The ATL gene family is represented b      | -1.112 | 6.69E-07 |
| At3g62750 | BGLU8 (beta glucosidase 8)                                                                                    | -1.06  | 9.86E-06 |
| At3g62760 | ATGSTF13 (Glutathione S-transferase family protein); Encodes glutathione transferase belonging to the phi cl  | 2.175  | 3.26E-08 |
| At3g62770 | AtATG18a (Transducin/WD40 repeat-like superfamily protein); Required for autophagosome formation durin        | 2.038  | 1.73E-08 |
| At3g62780 | Calcium-dependent lipid-binding (CaLB domain) family protein                                                  | 3.504  | 4.90E-10 |
| At3g62820 | Plant invertase/pectin methylesterase inhibitor superfamily protein                                           | -1.723 | 5.50E-07 |
| At3g62860 | alpha/beta-Hydrolases superfamily protein                                                                     | -1.239 | 1.74E-06 |
| At3g62930 | Thioredoxin superfamily protein                                                                               | -1.943 | 1.35E-07 |
| At3g62950 | Thioredoxin superfamily protein                                                                               | -2.81  | 3.06E-06 |
| At3g63110 | ATIPT3 (isopentenyltransferase 3); Encodes cytokinin synthase involved in cytokinin biosynthesis. IPT3 subce  | -1.439 | 4.64E-06 |
| At3g63160 | FUNCTIONS IN: molecular_function unknown; INVOLVED IN: biological_process unknown; LOCATED IN                 | -2.007 | 5.43E-08 |
| At3g63210 | MARD1 (MEDIATOR OF ABA-REGULATED DORMANCY 1); encodes a novel zinc-finger protein with a                      | -1.12  | 1.53E-06 |
| At3g63310 | BIL4 (BRZ-INSENSITIVE-LONG HYPOCOTYLS 4); Mediates cell elongation in brassinosteroid signaling.              | 2.979  | 3.29E-11 |
| At3g63320 | Protein phosphatase 2C family protein                                                                         | 2.679  | 6.09E-10 |
| At3g63340 | Protein phosphatase 2C family protein                                                                         | 1.69   | 9.41E-09 |
| At3g63350 | HSFA7B (HEAT SHOCK TRANSCRIPTION FACTOR A7B); member of Heat Stress Transcription Factor (I                   | 5.432  | 1.34E-10 |
| At3g63380 | ATPase E1-E2 type family protein / haloacid dehalogenase-like hydrolase family protein                        | 1.157  | 0.00239  |
| At4g00165 | Bifunctional inhibitor/lipid-transfer protein/seed storage 2S albumin superfamily protein                     | -1.246 | 7.04E-07 |

|           |                                                                                                                      |        |          |
|-----------|----------------------------------------------------------------------------------------------------------------------|--------|----------|
| At4g00236 | pseudogene, similar to leaf senescence-associated receptor-like protein kinase, blastp match of 56% identity an      | 2.155  | 1.02E-08 |
| At4g00300 | fringe-related protein                                                                                               | 1.193  | 1.52E-06 |
| At4g00342 | unknown protein                                                                                                      | 4.107  | 9.27E-07 |
| At4g00500 | alpha/beta-Hydrolases superfamily protein                                                                            | 1.424  | 6.51E-09 |
| At4g00540 | ATMYB3R2 (myb domain protein 3r2); Encodes a putative c-myb-like transcription factor. Member of a clas              | 6.364  | 1.52E-14 |
| At4g00550 | DGD2 (digalactosyl diacylglycerol deficient 2); encodes a UDP-galactose-dependent digalactosyldiacylglycero          | 3.352  | 2.49E-07 |
| At4g00590 | N-terminal nucleophile aminohydrolases (Ntn hydrolases) superfamily protein                                          | 1.152  | 5.32E-07 |
| At4g00670 | Remorin family protein                                                                                               | 2.108  | 1.01E-06 |
| At4g00760 | APRR8 (pseudo-response regulator 8); Encodes a response-regulator like protein.                                      | 1.982  | 1.35E-09 |
| At4g00820 | iqd17 (IQ-domain 17)                                                                                                 | -1.604 | 7.22E-08 |
| At4g00870 | basic helix-loop-helix (bHLH) DNA-binding superfamily protein                                                        | -1.678 | 3.58E-07 |
| At4g00940 | Dof-type zinc finger DNA-binding family protein                                                                      | 2.597  | 1.19E-09 |
| At4g00950 | MEE47 (maternal effect embryo arrest 47)                                                                             | -1.091 | 6.02E-07 |
| At4g01010 | ATCNGC13 (CYCLIC NUCLEOTIDE-GATED CHANNEL 13); member of Cyclic nucleotide gated channel 1                           | 2.089  | 1.72E-07 |
| At4g01070 | UGT72B1 (UDP-GLUCOSE-DEPENDENT GLUCOSYLTRANSFERASE 72 B1); the glycosyltransferase (U                                | 1.045  | 2.71E-05 |
| At4g01130 | GDSL-like Lipase/Acylhydrolase superfamily protein                                                                   | -1.435 | 1.45E-05 |
| At4g01250 | WRKY22 (WRKY family transcription factor); member of WRKY Transcription Factor; Group II-e                           | 2.228  | 2.38E-07 |
| At4g01280 | Homeodomain-like superfamily protein                                                                                 | 1.416  | 1.28E-06 |
| At4g01320 | ATSTE24 (Peptidase family M48 family protein); CAAX protease with broad substrate specificity. Localized c           | 1.121  | 2.69E-07 |
| At4g01330 | Protein kinase superfamily protein                                                                                   | -1.392 | 4.02E-06 |
| At4g01360 | unknown protein                                                                                                      | 1.348  | 0.01131  |
| At4g01430 | nodulin MtN21 /EamA-like transporter family protein                                                                  | -1.838 | 8.33E-07 |
| At4g01450 | nodulin MtN21 /EamA-like transporter family protein                                                                  | -1.078 | 7.03E-08 |
| At4g01540 | ANAC068 (Arabidopsis NAC domain containing protein 68); Encodes a membrane-bound NAC (for NAM, A                     | 1.093  | 0.00013  |
| At4g01550 | anac069 (NAC domain containing protein 69)                                                                           | 1.427  | 6.93E-07 |
| At4g01600 | GRAM domain family protein                                                                                           | -1.281 | 1.70E-06 |
| At4g01670 | unknown protein                                                                                                      | -1.151 | 3.87E-05 |
| At4g01720 | WRKY47 (WRKY family transcription factor); member of WRKY Transcription Factor; Group II-b                           | -1.176 | 0.0001   |
| At4g01740 | Cysteine/Histidine-rich C1 domain family protein                                                                     | -1.097 | 3.90E-06 |
| At4g01870 | tolB protein-related                                                                                                 | 2.556  | 1.77E-07 |
| At4g01895 | systemic acquired resistance (SAR) regulator protein NIMIN-1-related                                                 | 1.333  | 1.10E-06 |
| At4g02050 | STP7 (sugar transporter protein 7)                                                                                   | -1.795 | 3.43E-07 |
| At4g02090 | unknown protein                                                                                                      | 2.347  | 1.17E-08 |
| At4g02140 | unknown protein                                                                                                      | 2.325  | 4.55E-11 |
| At4g02195 | SYP42 (syntaxin of plants 42); member of SYP4 Gene Family                                                            | 2.379  | 5.84E-11 |
| At4g02200 | Drought-responsive family protein                                                                                    | 2.664  | 9.05E-10 |
| At4g02290 | AtGH9B13 (glycosyl hydrolase 9B13)                                                                                   | -1.309 | 0.0009   |
| At4g02380 | AtLEA5 (Arabidopsis thaliana late embryogenesis abundant like 5); Encodes AtLEA5 (late embryogenesis at              | 1.484  | 9.98E-06 |
| At4g02410 | Concanavalin A-like lectin protein kinase family protein                                                             | 2.009  | 5.62E-08 |
| At4g02425 | unknown protein                                                                                                      | 2.962  | 5.86E-11 |
| At4g02550 | unknown protein                                                                                                      | 3.282  | 2.50E-12 |
| At4g02655 | unknown protein                                                                                                      | 1.185  | 5.59E-08 |
| At4g02690 | Bax inhibitor-1 family protein                                                                                       | 3.25   | 7.21E-07 |
| At4g02730 | Transducin/WD40 repeat-like superfamily protein                                                                      | 1.73   | 4.26E-09 |
| At4g02740 | F-box/RNI-like superfamily protein                                                                                   | 1.183  | 6.46E-09 |
| At4g02810 | Protein of unknown function (DUF3049)                                                                                | -1.04  | 5.24E-06 |
| At4g02920 | unknown protein                                                                                                      | 1.066  | 1.60E-07 |
| At4g02940 | oxidoreductase, 2OG-Fe(II) oxygenase family protein                                                                  | 1.193  | 7.86E-07 |
| At4g02950 | Ubiquitin family protein                                                                                             | 4.767  | 1.11E-12 |
| At4g02980 | ABP1 (endoplasmic reticulum auxin binding protein 1); Auxin binding protein involved in cell elongation and          | 2.205  | 1.34E-10 |
| At4g03010 | RNI-like superfamily protein                                                                                         | -1.015 | 2.82E-05 |
| At4g03038 | other RNA; Unknown gene                                                                                              | -2.919 | 8.41E-09 |
| At4g03060 | similar to AOP3 (2-oxoglutarate?dependent dioxygenase 3), oxidoreductase, acting on paired donors, with ince         | -4.311 | 4.68E-11 |
| At4g03110 | AtRBP-DR1 (RNA-binding protein-defense related 1); Encodes a putative RNA-binding protein that is located            | 1.163  | 2.47E-06 |
| At4g03113 | unknown protein                                                                                                      | 1.158  | 2.38E-07 |
| At4g03230 | S-locus lectin protein kinase family protein                                                                         | 1.21   | 1.80E-07 |
| At4g03240 | FH (frataxin homolog); Encodes AtFH, a frataxin homolog. Frataxin is required for the biogenesis of mitochoi         | 1.02   | 3.34E-06 |
| At4g03292 | Polynucleotidyl transferase, ribonuclease H-like superfamily protein                                                 | 1.447  | 4.33E-05 |
| At4g03320 | tic20-IV (translocon at the inner envelope membrane of chloroplasts 20-IV)                                           | 2.157  | 6.18E-08 |
| At4g03330 | SYP123 (syntaxin of plants 123); member of SYP12 Gene Family                                                         | 1.098  | 1.52E-05 |
| At4g03360 | Ubiquitin family protein                                                                                             | 3.136  | 1.81E-09 |
| At4g03420 | Protein of unknown function (DUF789)                                                                                 | -1.004 | 3.32E-07 |
| At4g03430 | EMB2770 (EMBRYO DEFECTIVE 2770); Encodes a nuclear protein similar to the human U5 small ribonuck                    | 1.436  | 8.37E-08 |
| At4g03450 | Ankyrin repeat family protein                                                                                        | 3.333  | 0.00016  |
| At4g03510 | RMA1 (RING membrane-anchor 1); RMA1 encodes a novel 28 kDa protein with a RING finger motif and a C                  | -1.065 | 0.0177   |
| At4g03965 | RING/U-box superfamily protein                                                                                       | 1.09   | 2.24E-06 |
| At4g04020 | FIB (fibrillin); Fibrillin precursor protein. The fibrillin preprotein, but not the mature protein interacts with AB | 3.532  | 9.40E-10 |

|           |                                                                                                                      |        |          |
|-----------|----------------------------------------------------------------------------------------------------------------------|--------|----------|
| At4g04293 | pseudogene, similar to P0703B11.15, blastp match of 38% identity and 2.2e-25 P-value to GP 18844826 dbj B            | -1.822 | 1.43E-06 |
| At4g04330 | Chaperonin-like RbcX protein                                                                                         | -3.292 | 9.75E-08 |
| At4g04340 | ERD (early-responsive to dehydration stress) family protein                                                          | -1.575 | 1.05E-07 |
| At4g04490 | CRK36 (cysteine-rich RLK (RECEPTOR-like protein kinase) 36); Encodes a cysteine-rich receptor-like protei            | 1.002  | 0.04003  |
| At4g04540 | CRK39 (cysteine-rich RLK (RECEPTOR-like protein kinase) 39); Encodes a cysteine-rich receptor-like protei            | 4.112  | 4.78E-12 |
| At4g04610 | APR1 (APS reductase 1); Encodes a protein disulfide isomerase-like (PDIL) protein, a member of a multigene           | 2.49   | 7.81E-09 |
| At4g04655 | non-LTR retrotransposon family (LINE), has a 1.0e-19 P-value blast match to GB:NP_038602 L1 repeat, Tf su            | 1.411  | 3.67E-08 |
| At4g04745 | unknown protein                                                                                                      | -1.355 | 0.00328  |
| At4g04750 | Major facilitator superfamily protein                                                                                | -1.351 | 1.01E-06 |
| At4g04800 | ATMSRB3 (methionine sulfoxide reductase B3)                                                                          | 1.581  | 1.35E-10 |
| At4g04830 | ATMSRB5 (methionine sulfoxide reductase B5)                                                                          | 1.139  | 3.16E-05 |
| At4g04955 | ALN (allantoinase); Encodes an allantoinase which is involved in allantoin degradation and assimilation. Gene        | -1.058 | 1.26E-05 |
| At4g04970 | ATGSL01 (GLUCAN SYNTHASE LIKE 1); encodes a gene similar to callose synthase                                         | -1.043 | 1.40E-05 |
| At4g05010 | F-box family protein                                                                                                 | 1.494  | 1.17E-08 |
| At4g05018 | unknown protein                                                                                                      | 1.805  | 9.34E-06 |
| At4g05020 | NDB2 (NAD(P)H dehydrogenase B2)                                                                                      | 3.467  | 1.64E-08 |
| At4g05130 | ENT4 (equilibrative nucleoside transporter 4)                                                                        | -2.025 | 1.35E-08 |
| At4g05490 | RNI-like superfamily protein                                                                                         | 1.094  | 2.14E-06 |
| At4g06521 | non-LTR retrotransposon family (LINE), has a 1.8e-23 P-value blast match to GB:NP_038604 L1 repeat, Tf su            | -2.136 | 2.08E-06 |
| At4g07675 | unknown protein                                                                                                      | 2.691  | 6.85E-09 |
| At4g08230 | glycine-rich protein                                                                                                 | 2.374  | 2.10E-09 |
| At4g08290 | nodulin MtN21 /EamA-like transporter family protein                                                                  | -1.348 | 5.20E-07 |
| At4g08300 | nodulin MtN21 /EamA-like transporter family protein                                                                  | -2.791 | 7.67E-07 |
| At4g08320 | Tetratricopeptide repeat (TPR)-like superfamily protein                                                              | 2.721  | 3.36E-12 |
| At4g08330 | unknown protein                                                                                                      | 1.201  | 7.14E-09 |
| At4g08500 | MEKK1 (MAPK/ERK kinase kinase 1); Encodes a member of the A1 subgroup of the MEKK (MAPK/ERK ki                       | 1.119  | 2.79E-07 |
| At4g08555 | unknown protein                                                                                                      | 2.622  | 2.52E-06 |
| At4g08590 | ORL1 (ORTH-LIKE 1)                                                                                                   | 1.044  | 3.21E-06 |
| At4g08685 | SAH7 (Pollen Ole e 1 allergen and extensin family protein); Encodes a protein, expressed in leaves, with simil       | -1.104 | 8.30E-07 |
| At4g08920 | BLU1 (BLUE LIGHT UNINHIBITED 1); Encodes CRY1, a flavin-type blue-light photoreceptor with ATP bin                   | -1.249 | 7.72E-08 |
| At4g09020 | ISA3 (isoamylase 3); Encodes an isoamylase-like protein. Mutant studies show that the gene is strongly involv        | -1.253 | 2.03E-05 |
| At4g09080 | ATTOC75-IV (TRANSLOCON OUTER MEMBRANE COMPLEX 75-IV); Component of the translocon oute                               | 2.001  | 4.85E-09 |
| At4g09150 | T-complex protein 11                                                                                                 | 4.224  | 3.17E-12 |
| At4g09300 | LisH and RanBPM domains containing protein                                                                           | 2.274  | 6.24E-08 |
| At4g09420 | Disease resistance protein (TIR-NBS class)                                                                           | -1.178 | 1.61E-05 |
| At4g09570 | CPK4 (calcium-dependent protein kinase 4); Encodes a member of Calcium Dependent Protein Kinase (CDPK                | 1.991  | 5.70E-10 |
| At4g09750 | NAD(P)-binding Rossmann-fold superfamily protein                                                                     | 1.698  | 0.00013  |
| At4g09760 | Protein kinase superfamily protein; encodes a choline synthase whose gene expression is induced by high salt ;       | -1.335 | 2.11E-06 |
| At4g09890 | Protein of unknown function (DUF3511)                                                                                | -1.447 | 1.25E-07 |
| At4g10040 | CYTC-2 (cytochrome c-2); Encodes cytochrome c. Promoter directs preferential expression in vascular tissues          | 2.601  | 3.37E-09 |
| At4g10110 | RNA-binding (RRM/RBD/RNP motifs) family protein                                                                      | 1.142  | 6.18E-07 |
| At4g10120 | ATSPS4F (Sucrose-phosphate synthase family protein); Encodes a protein with putative sucrose-phosphate syn           | -1.497 | 0.00014  |
| At4g10150 | RING/U-box superfamily protein                                                                                       | -1.247 | 0.00054  |
| At4g10160 | RING/U-box superfamily protein                                                                                       | -1.29  | 0.00031  |
| At4g10240 | B-box zinc finger family protein                                                                                     | 3.582  | 1.03E-10 |
| At4g10250 | ATHSP22.0 (HSP20-like chaperones superfamily protein); Columbia endomembrane-localized small heat sho                | 9.933  | 4.23E-10 |
| At4g10280 | RmlC-like cupins superfamily protein                                                                                 | -1.303 | 3.12E-06 |
| At4g10310 | HKT1 (high-affinity K <sup>+</sup> transporter 1); encodes a sodium transporter (HKT1) expressed in xylem parenchyma | -1.631 | 2.11E-07 |
| At4g10410 | Leucine-rich repeat (LRR) family protein                                                                             | 2.484  | 3.66E-10 |
| At4g10420 | FBD / Leucine Rich Repeat domains containing protein                                                                 | 1.28   | 1.54E-07 |
| At4g10430 | TMPIT-like protein                                                                                                   | 1.187  | 1.34E-07 |
| At4g10440 | S-adenosyl-L-methionine-dependent methyltransferases superfamily protein                                             | 1.055  | 2.32E-07 |
| At4g10500 | 2-oxoglutarate (2OG) and Fe(II)-dependent oxygenase superfamily protein                                              | -2.795 | 0.00485  |
| At4g10910 | unknown protein                                                                                                      | -1.514 | 4.35E-05 |
| At4g11000 | Ankyrin repeat family protein                                                                                        | 1.097  | 2.03E-05 |
| At4g11220 | BTI2 (VIRB2-interacting protein 2)                                                                                   | 2.068  | 2.19E-10 |
| At4g11330 | ATMPK5 (MAP kinase 5); MAP kinase                                                                                    | 1.321  | 1.15E-07 |
| At4g11350 | Protein of unknown function (DUF604)                                                                                 | 1.353  | 7.48E-06 |
| At4g11370 | RHA1A (RING-H2 finger A1A); Encodes a putative RING-H2 finger protein RHA1a.                                         | 1.454  | 1.14E-06 |
| At4g11460 | CRK30 (cysteine-rich RLK (RECEPTOR-like protein kinase) 30); Encodes a cysteine-rich receptor-like protei            | -1.91  | 5.21E-07 |
| At4g11470 | CRK31 (cysteine-rich RLK (RECEPTOR-like protein kinase) 31); Encodes a cysteine-rich receptor-like protei            | 2.186  | 1.99E-08 |
| At4g11650 | ATOSM34 (osmotin 34); osmotin-like protein                                                                           | -2.244 | 0.0266   |
| At4g11660 | HSFB2B (HEAT SHOCK TRANSCRIPTION FACTOR B2B); member of Heat Stress Transcription Factor (H                          | 3.515  | 2.50E-12 |
| At4g11740 | SAY1 (Ubiquitin-like superfamily protein); Isolated as a suppressor of a dominant mutant in the Ara4 gene tha        | 2.868  | 9.53E-12 |
| At4g11910 | INVOLVED IN: biological_process unknown                                                                              | -2.124 | 2.90E-06 |
| At4g12030 | BASS5 (BILE ACID:SODIUM SYMPORTER FAMILY PROTEIN 5); Required for the biosynthesis of methi                          | -3.653 | 1.83E-10 |
| At4g12090 | Cornichon family protein                                                                                             | -2.25  | 2.92E-06 |



|           |                                                                                                                 |        |          |
|-----------|-----------------------------------------------------------------------------------------------------------------|--------|----------|
| At4g12120 | SEC1B (Sec1/munc18-like (SM) proteins superfamily); member of KEULE Gene Family                                 | 4.298  | 2.48E-12 |
| At4g12320 | CYP706A6 (cytochrome P450, family 706, subfamily A, polypeptide 6); member of CYP706A                           | -2.093 | 2.22E-06 |
| At4g12334 | Cytochrome P450 superfamily protein                                                                             | 1.391  | 2.32E-06 |
| At4g12390 | PME1 (pectin methylesterase inhibitor 1)                                                                        | -1.286 | 8.03E-05 |
| At4g12400 | stress-inducible protein, putative                                                                              | 7.205  | 1.43E-12 |
| At4g12410 | SAUR-like auxin-responsive protein family                                                                       | 3.822  | 6.55E-11 |
| At4g12420 | SKU5 (Cupredoxin superfamily protein); Encodes a protein of unknown function involved in directed root tip      | -1.01  | 2.13E-07 |
| At4g12470 | AZII (azelaic acid induced 1); Encodes AZII (AZELAIC ACID INDUCED 1). Involved in the priming of sali           | -1.813 | 0.00457  |
| At4g12480 | pEARLI 1 (Bifunctional inhibitor/lipid-transfer protein/seed storage 2S albumin superfamily protein); a putativ | -1.679 | 0.04013  |
| At4g12510 | Bifunctional inhibitor/lipid-transfer protein/seed storage 2S albumin superfamily protein                       | -4.67  | 2.17E-07 |
| At4g12520 | Bifunctional inhibitor/lipid-transfer protein/seed storage 2S albumin superfamily protein                       | -1.923 | 1.44E-06 |
| At4g12610 | RAP74 (transcription activators;DNA binding;RNA polymerase II transcription factors;catalytics;transcription    | 1.769  | 0.0045   |
| At4g12720 | AtNUDT7 (Arabidopsis thaliana Nudix hydrolase homolog 7); Encodes a protein with ADP-ribose hydrolase a         | 3.011  | 1.59E-08 |
| At4g12735 | unknown protein                                                                                                 | 3.5    | 9.30E-07 |
| At4g12830 | alpha/beta-Hydrolases superfamily protein                                                                       | 1.35   | 8.75E-06 |
| At4g12900 | Gamma interferon responsive lysosomal thiol (GILT) reductase family protein                                     | -1.283 | 2.52E-06 |
| At4g13010 | Oxidoreductase, zinc-binding dehydrogenase family protein                                                       | 1.375  | 4.48E-09 |
| At4g13110 | BSD domain-containing protein                                                                                   | 1.345  | 2.77E-06 |
| At4g13180 | NAD(P)-binding Rossmann-fold superfamily protein                                                                | 3.37   | 8.25E-11 |
| At4g13250 | NYC1 (NON-YELLOW COLORING 1); Encodes a chlorophyll b reductase involved in the degradation of chl              | -1.571 | 1.76E-07 |
| At4g13280 | TPS12 (terpenoid synthase 12); Catalyzes the conversion of farnesyl diphosphate to (Z)-gamma-bisabolene anc     | -1.063 | 0.01357  |
| At4g13300 | TPS13 (terpenoid synthase 13); Catalyzes the conversion of farnesyl diphosphate to (Z)-gamma-bisabolene anc     | -1.222 | 0.00232  |
| At4g13345 | MEE55 (maternal effect embryo arrest 55)                                                                        | -1.172 | 1.65E-06 |
| At4g13493 | MIR850A (microRNA850A); Encodes a microRNA of unknown function. MicroRNAs are regulatory RNAs w                 | -1.275 | 4.89E-07 |
| At4g13494 | MIR863A (microRNA863A); Encodes a microRNA of unknown function. MicroRNAs are regulatory RNAs w                 | -1.323 | 2.23E-08 |
| At4g13495 | other RNA; Unknown gene                                                                                         | -1.204 | 2.57E-06 |
| At4g13510 | AMT1.1 (ammonium transporter 1.1); Encodes a plasma membrane localized ammonium transporter. Contain            | 1.059  | 1.95E-06 |
| At4g13550 | triglyceride lipases                                                                                            | 2.366  | 2.34E-10 |
| At4g13575 | unknown protein                                                                                                 | -1.03  | 2.98E-06 |
| At4g13620 | Integrase-type DNA-binding superfamily protein; encodes a member of the DREB subfamily A-6 of ERF/AP2           | 2.454  | 2.28E-09 |
| At4g13650 | Pentatricopeptide repeat (PPR) superfamily protein                                                              | -1.027 | 1.18E-06 |
| At4g13660 | PRR2 (pinoresinol reductase 2); Encodes a pinoresinol reductase involved in lignan biosynthesis. Expressed st   | -1.131 | 0.00011  |
| At4g13700 | PAP23 (purple acid phosphatase 23)                                                                              | -1.42  | 0.00059  |
| At4g13770 | CYP83A1 (cytochrome P450, family 83, subfamily A, polypeptide 1); Encodes a cytochrome p450 enzyme tha          | -3.505 | 5.43E-13 |
| At4g13810 | AtRLP47 (receptor like protein 47)                                                                              | -1.1   | 5.51E-05 |
| At4g13840 | HXXXD-type acyl-transferase family protein                                                                      | -1.152 | 4.13E-06 |
| At4g14030 | SBP1 (selenium-binding protein 1)                                                                               | 1.095  | 0.0122   |
| At4g14040 | EDA38 (EMBRYO SAC DEVELOPMENT ARREST 38)                                                                        | -1.277 | 6.59E-08 |
| At4g14220 | RHF1A (RING-H2 group F1A); encodes a RING-type E3 ubiquitin ligase implicated in gametogenesis. RHF1:           | 1.69   | 1.32E-07 |
| At4g14225 | A20/AN1-like zinc finger family protein                                                                         | 1.613  | 1.94E-06 |
| At4g14230 | CBS domain-containing protein with a domain of unknown function (DUF21)                                         | -1.095 | 5.24E-07 |
| At4g14250 | structural constituent of ribosome                                                                              | -1.165 | 0.00048  |
| At4g14300 | RNA-binding (RRM/RBD/RNP motifs) family protein                                                                 | 1.805  | 1.43E-08 |
| At4g14365 | XBAT34 (XB3 ortholog 4 in Arabidopsis thaliana)                                                                 | 1.888  | 3.45E-05 |
| At4g14370 | Disease resistance protein (TIR-NBS-LRR class) family                                                           | 2.075  | 5.67E-06 |
| At4g14380 | unknown protein                                                                                                 | -1.346 | 2.29E-07 |
| At4g14385 | FUNCTIONS IN: molecular_function unknown; INVOLVED IN: biological_process unknown; LOCATED IN                   | 1.161  | 2.74E-06 |
| At4g14480 | Protein kinase superfamily protein                                                                              | -2.093 | 6.46E-08 |
| At4g14540 | NF-YB3 (nuclear factor Y, subunit B3)                                                                           | -1.425 | 2.84E-07 |
| At4g14548 | other RNA                                                                                                       | -1.757 | 1.50E-07 |
| At4g14560 | AXR5 (AUXIN RESISTANT 5); auxin (indole-3-acetic acid) induced gene (IAA1) encoding a short-lived nuc           | -1.566 | 5.99E-07 |
| At4g14650 | unknown protein                                                                                                 | -1.274 | 6.59E-06 |
| At4g14690 | ELIP2 (EARLY LIGHT-INDUCIBLE PROTEIN 2); Encodes an early light-induced protein. ELIPs are though               | 3.533  | 2.55E-09 |
| At4g14695 | Uncharacterised protein family (UPF0041)                                                                        | 1.036  | 1.48E-06 |
| At4g14750 | IQD19 (IQ-domain 19)                                                                                            | -1.141 | 1.12E-05 |
| At4g15130 | CCT2 (phosphorylcholine cytidyltransferase2)                                                                    | 1.053  | 1.37E-07 |
| At4g15210 | ATBETA-AMY (ARABIDOPSIS THALIANA BETA-AMYLASE); cytosolic beta-amylase expressed in roset                       | -1.795 | 0.0069   |
| At4g15248 | B-box type zinc finger family protein                                                                           | 3.91   | 4.65E-07 |
| At4g15280 | UGT71B5 (UDP-glucosyl transferase 71B5)                                                                         | 1.671  | 1.08E-09 |
| At4g15350 | CYP705A2 (cytochrome P450, family 705, subfamily A, polypeptide 2); member of CYP705A                           | 1.147  | 0.00109  |
| At4g15410 | PUX5 (serine/threonine protein phosphatase 2A 55 kDa regulatory subunit B prime gamma)                          | 1.443  | 8.51E-05 |
| At4g15420 | Ubiquitin fusion degradation UFD1 family protein                                                                | 3.064  | 1.15E-06 |
| At4g15470 | Bax inhibitor-1 family protein                                                                                  | 1.004  | 8.76E-06 |
| At4g15540 | EamA-like transporter family                                                                                    | -1.362 | 2.51E-06 |
| At4g15660 | Thioredoxin superfamily protein                                                                                 | -2.237 | 4.70E-07 |
| At4g15670 | Thioredoxin superfamily protein                                                                                 | -2.334 | 3.33E-08 |
| At4g15680 | Thioredoxin superfamily protein                                                                                 | -2.604 | 1.27E-07 |

|           |                                                                                                                       |        |          |
|-----------|-----------------------------------------------------------------------------------------------------------------------|--------|----------|
| At4g15690 | Thioredoxin superfamily protein                                                                                       | -1.689 | 0.0036   |
| At4g15700 | Thioredoxin superfamily protein                                                                                       | -2.774 | 5.37E-09 |
| At4g15880 | ESD4 (EARLY IN SHORT DAYS 4); EARLY IN SHORT DAYS 4 Arabidopsis mutant shows extreme early :                          | 1.405  | 6.75E-08 |
| At4g15975 | RING/U-box superfamily protein                                                                                        | 2.836  | 7.84E-09 |
| At4g16000 | unknown protein                                                                                                       | -1.118 | 0.00064  |
| At4g16008 | unknown protein                                                                                                       | -1.535 | 8.22E-05 |
| At4g16146 | cAMP-regulated phosphoprotein 19-related protein                                                                      | -2.214 | 4.92E-08 |
| At4g16215 | unknown protein                                                                                                       | 1.607  | 1.83E-07 |
| At4g16460 | unknown protein                                                                                                       | 1.738  | 6.30E-06 |
| At4g16500 | Cystatin/monellin superfamily protein                                                                                 | 1.532  | 9.08E-09 |
| At4g16563 | Eukaryotic aspartyl protease family protein                                                                           | -1.64  | 0.00016  |
| At4g16580 | Protein phosphatase 2C family protein                                                                                 | 1.028  | 1.13E-06 |
| At4g16660 | heat shock protein 70 (Hsp 70) family protein                                                                         | 2.288  | 3.43E-09 |
| At4g16680 | P-loop containing nucleoside triphosphate hydrolases superfamily protein                                              | 2.698  | 3.45E-07 |
| At4g16690 | ATMES16 (ARABIDOPSIS THALIANA METHYL ESTERASE 16); Encodes a protein shown to have carbox                             | 1.777  | 3.75E-08 |
| At4g16760 | ACX1 (acyl-CoA oxidase 1); Encodes a medium to long-chain acyl-CoA oxidase. Catalyzes the first step of fat           | 1.056  | 8.36E-06 |
| At4g16820 | PLA-I[ $\beta$ ]2 (phospholipase A I $\beta$ 2); Encodes a lipase that hydrolyzes phosphatidylcholine, glycolipids as | 4.41   | 4.83E-11 |
| At4g16940 | Disease resistance protein (TIR-NBS-LRR class) family                                                                 | 1.924  | 1.62E-08 |
| At4g17030 | ATEXLB1 (expansin-like B1); Encodes EXLB1 (expansin-like B1), a member of the expansin family.                        | -1.062 | 0.0007   |
| At4g17070 | peptidyl-prolyl cis-trans isomerases                                                                                  | 1.57   | 4.70E-09 |
| At4g17098 | other RNA; Potential natural antisense gene, locus overlaps with AT4G17100                                            | 2.4    | 1.52E-08 |
| At4g17100 | CONTAINS InterPro DOMAIN/s: Endoribonuclease XendoU (InterPro:IPR018998); Has 943 Blast hits to 77C                   | -1.118 | 2.11E-06 |
| At4g17160 | ATRABB1A (RAB GTPase homolog B1A)                                                                                     | 2.08   | 1.95E-07 |
| At4g17250 | unknown protein                                                                                                       | 4.322  | 6.61E-12 |
| At4g17260 | Lactate/malate dehydrogenase family protein                                                                           | 1.476  | 7.66E-07 |
| At4g17280 | Auxin-responsive family protein                                                                                       | -1.192 | 0.0006   |
| At4g17460 | HAT1 (Homeobox-leucine zipper protein 4 (HB-4) / HD-ZIP protein); Encodes homeobox protein HAT1.                      | -1.485 | 1.90E-07 |
| At4g17490 | ATERF6 (ethylene responsive element binding factor 6); Encodes a member of the ERF (ethylene response fac             | 2.391  | 2.80E-07 |
| At4g17530 | ATRAB1C (RAB GTPase homolog 1C)                                                                                       | 1.509  | 2.91E-08 |
| At4g17580 | Bax inhibitor-1 family protein                                                                                        | 1.725  | 1.25E-05 |
| At4g17585 | Aluminium activated malate transporter family protein                                                                 | 1.006  | 6.30E-07 |
| At4g17615 | ATCBL1 (ARABIDOPSIS THALIANA CALCINEURIN B-LIKE PROTEIN); Member of AtCBL (Calcineurin                                | 2.38   | 4.34E-11 |
| At4g17616 | Pentatricopeptide repeat (PPR) superfamily protein                                                                    | 1.657  | 1.25E-08 |
| At4g17650 | Polyketide cyclase / dehydrase and lipid transport protein                                                            | 1.682  | 1.42E-09 |
| At4g17840 | FUNCTIONS IN: molecular_function unknown; INVOLVED IN: biological_process unknown; LOCATED IN                         | 1.981  | 9.13E-07 |
| At4g17900 | PLATZ transcription factor family protein                                                                             | 2.322  | 3.27E-10 |
| At4g18240 | ATSS4 (ARABIDOPSIS THALIANA STARCH SYNTHASE 4)                                                                        | -1.234 | 6.57E-08 |
| At4g18250 | receptor serine/threonine kinase, putative                                                                            | 1.403  | 3.45E-05 |
| At4g18340 | Glycosyl hydrolase superfamily protein                                                                                | -1.664 | 3.13E-08 |
| At4g18450 | Integrase-type DNA-binding superfamily protein; encodes a member of the ERF (ethylene response factor) sub            | 2.446  | 5.39E-10 |
| At4g18610 | LSH9 (LIGHT SENSITIVE HYPOCOTYLS 9)                                                                                   | -1.132 | 4.14E-06 |
| At4g18630 | Protein of unknown function (DUF688)                                                                                  | -1.353 | 1.11E-06 |
| At4g18823 | Defensin-like (DEFL) family protein; Encodes a defensin-like (DEFL) family protein.                                   | 1.339  | 1.19E-07 |
| At4g18880 | AT-HSFA4A (ARABIDOPSIS THALIANA HEAT SHOCK TRANSCRIPTION FACTOR A4A); member of                                       | 2.242  | 1.09E-09 |
| At4g18890 | BEH3 (BES1/BZR1 homolog 3)                                                                                            | 1.544  | 2.88E-08 |
| At4g18930 | RNA ligase/cyclic nucleotide phosphodiesterase family protein                                                         | -1.428 | 3.51E-07 |
| At4g18950 | Integrin-linked protein kinase family                                                                                 | 1.278  | 3.41E-06 |
| At4g19038 | LCR15 (low-molecular-weight cysteine-rich 15); Encodes a member of a family of small,secreted, cysteine rich          | 1.729  | 3.17E-09 |
| At4g19120 | ERD3 (early-responsive to dehydration 3)                                                                              | -2.079 | 1.01E-09 |
| At4g19170 | CCD4 (carotenoid cleavage dioxygenase 4); chloroplast-targeted member of a family of enzymes similar to ni            | -3.13  | 1.65E-08 |
| At4g19380 | Long-chain fatty alcohol dehydrogenase family protein                                                                 | -1.203 | 2.19E-05 |
| At4g19460 | UDP-Glycosyltransferase superfamily protein                                                                           | 1.145  | 3.49E-06 |
| At4g19470 | Leucine-rich repeat (LRR) family protein                                                                              | 1.84   | 4.57E-10 |
| At4g19515 | NA                                                                                                                    | 1.922  | 1.07E-05 |
| At4g19520 | disease resistance protein (TIR-NBS-LRR class) family                                                                 | 2.135  | 2.17E-05 |
| At4g19633 | pseudogene of heat shock factor related protein; pseudogene of heat shock factor related protein                      | 1.21   | 0.00016  |
| At4g19640 | ATRAB-F2B (ARABIDOPSIS RAB GTPASE HOMOLOG F2B); Encodes Ara7.                                                         | 1.12   | 1.17E-07 |
| At4g19700 | RING (SBP (S-ribonuclease binding protein) family protein)                                                            | -1.304 | 1.10E-08 |
| At4g19810 | Glycosyl hydrolase family protein with chitinase insertion domain                                                     | -1.412 | 0.01114  |
| At4g19820 | Glycosyl hydrolase family protein with chitinase insertion domain                                                     | -1.153 | 3.88E-05 |
| At4g19970 | CONTAINS InterPro DOMAIN/s: Nucleotide-diphospho-sugar transferase, predicted (InterPro:IPR005069); B                 | -1.316 | 8.68E-07 |
| At4g20000 | VQ motif-containing protein                                                                                           | -1.445 | 0.00066  |
| At4g20160 | LOCATED IN: chloroplast                                                                                               | 1.834  | 4.93E-06 |
| At4g20230 | Terpenoid cyclases/Protein prenyltransferases superfamily protein                                                     | -2.514 | 1.23E-09 |
| At4g20270 | BAM3 (BARELY ANY MERISTEM 3); Encodes a CLAVATA1-related receptor kinase-like protein required                        | -1.067 | 6.67E-05 |
| At4g20300 | Protein of unknown function (DUF1639)                                                                                 | 1.008  | 7.01E-08 |
| At4g20330 | Transcription initiation factor TFIIE, beta subunit                                                                   | 1.23   | 7.11E-07 |

|           |                                                                                                                 |        |          |
|-----------|-----------------------------------------------------------------------------------------------------------------|--------|----------|
| At4g20380 | LSD1 (LESION SIMULATING DISEASE); LSD1 monitors a superoxide-dependent signal and negatively reg                | 1.162  | 1.13E-06 |
| At4g20460 | NAD(P)-binding Rossmann-fold superfamily protein                                                                | 1.127  | 3.01E-06 |
| At4g20690 | unknown protein                                                                                                 | 1.243  | 5.51E-06 |
| At4g20780 | CML42 (calmodulin like 42); Calcium sensor involved in trichome branching.                                      | 2.48   | 5.39E-08 |
| At4g20820 | FAD-binding Berberine family protein                                                                            | 1.175  | 0.0446   |
| At4g20830 | FAD-binding Berberine family protein                                                                            | 1.689  | 4.94E-07 |
| At4g20860 | FAD-binding Berberine family protein                                                                            | 2.223  | 8.10E-09 |
| At4g20990 | ACA4 (alpha carbonic anhydrase 4)                                                                               | 3.023  | 1.81E-08 |
| At4g21090 | ATMFDX2 (ARABIDOPSIS MITOCHONDRIAL FERREDOXIN 2)                                                                | 2.426  | 1.30E-09 |
| At4g21120 | AAT1 (amino acid transporter 1); Encodes a member of the cationic amino acid transporter (CAT) subfamily c      | 2.386  | 1.05E-06 |
| At4g21200 | ATGA2OX8 (ARABIDOPSIS THALIANA GIBBERELLIN 2-OXIDASE 8); Encodes a protein with gibberell                       | -1.268 | 1.53E-06 |
| At4g21215 | unknown protein                                                                                                 | -1.473 | 1.52E-06 |
| At4g21310 | Protein of unknown function (DUF1218)                                                                           | 1.592  | 5.74E-09 |
| At4g21320 | HSA32 (HEAT-STRESS-ASSOCIATED 32); Encodes heat-stress-associated 32-kD protein. Up-regulated by l              | 6.669  | 2.33E-12 |
| At4g21323 | Subtilase family protein                                                                                        | 5.792  | 1.49E-12 |
| At4g21330 | DYT1 (DYSFUNCTIONAL TAPETUM 1); Encodes a bHLH transcription factor strongly expressed in the tap               | 2.357  | 4.83E-11 |
| At4g21390 | B120 (S-locus lectin protein kinase family protein)                                                             | 4.1    | 2.31E-10 |
| At4g21580 | oxidoreductase, zinc-binding dehydrogenase family protein                                                       | 2.077  | 2.03E-08 |
| At4g21590 | ENDO3 (endonuclease 3); Encodes a putative endonuclease but no demonstrable endonuclease activity, either       | 2.029  | 6.14E-07 |
| At4g21620 | glycine-rich protein                                                                                            | -1.087 | 1.85E-06 |
| At4g21650 | Subtilase family protein                                                                                        | -1.247 | 2.40E-07 |
| At4g21810 | DER2.1 (DERLIN-2.1)                                                                                             | 1.516  | 2.86E-09 |
| At4g21865 | unknown protein                                                                                                 | 1.899  | 2.13E-08 |
| At4g21920 | unknown protein                                                                                                 | 1.18   | 0.00745  |
| At4g21970 | Protein of unknown function, DUF584                                                                             | -1.232 | 3.95E-06 |
| At4g21990 | APR3 (APS reductase 3); Encodes a protein disulfide isomerase-like (PDIL) protein, a member of a multigene      | 3.685  | 8.80E-11 |
| At4g22050 | Eukaryotic aspartyl protease family protein                                                                     | -1.016 | 0.00113  |
| At4g22230 | Arabidopsis defensin-like protein; Encodes a defensin-like (DEFL) family protein.                               | -1.196 | 0.00013  |
| At4g22240 | Plastid-lipid associated protein PAP / fibrillin family protein                                                 | 1.049  | 2.53E-07 |
| At4g22285 | Ubiquitin C-terminal hydrolases superfamily protein                                                             | 1.077  | 9.26E-08 |
| At4g22340 | CDS2 (cytidinediphosphate diacylglycerol synthase 2)                                                            | 1.88   | 3.06E-09 |
| At4g22350 | Ubiquitin C-terminal hydrolases superfamily protein                                                             | 2.3    | 2.00E-10 |
| At4g22470 | protease inhibitor/seed storage/lipid transfer protein (LTP) family protein                                     | -2.336 | 0.00036  |
| At4g22485 | Bifunctional inhibitor/lipid-transfer protein/seed storage 2S albumin superfamily protein; Encodes a Protease i | -1.403 | 0.00108  |
| At4g22505 | Bifunctional inhibitor/lipid-transfer protein/seed storage 2S albumin superfamily protein                       | -1.226 | 0.00131  |
| At4g22530 | S-adenosyl-L-methionine-dependent methyltransferases superfamily protein                                        | 2.15   | 1.90E-08 |
| At4g22540 | ORP2A (OSBP(oxysterol binding protein)-related protein 2A)                                                      | -1.231 | 1.21E-06 |
| At4g22700 | LBD32 (LOB domain-containing protein 32)                                                                        | 1.021  | 7.47E-07 |
| At4g22730 | Leucine-rich repeat protein kinase family protein                                                               | -1.38  | 2.42E-08 |
| At4g22740 | glycine-rich protein                                                                                            | 2.126  | 5.43E-11 |
| At4g22780 | ACR7 (ACT domain repeat 7); Member of a family of ACT domain containing proteins . ACT domains are in           | 1.306  | 0.0002   |
| At4g22790 | MATE efflux family protein                                                                                      | -1.808 | 1.90E-08 |
| At4g22820 | A20/AN1-like zinc finger family protein                                                                         | 1.166  | 2.68E-07 |
| At4g22960 | Protein of unknown function (DUF544)                                                                            | 1.578  | 1.95E-06 |
| At4g22980 | FUNCTIONS IN: molecular_function unknown; INVOLVED IN: biological_process unknown; LOCATED IN                   | 1.947  | 4.45E-07 |
| At4g23010 | UTR2 (UDP-galactose transporter 2)                                                                              | 1.147  | 5.44E-07 |
| At4g23130 | CRK5 (cysteine-rich RLK (RECEPTOR-like protein kinase) 5); Encodes a receptor-like protein kinase. Namin        | -1.85  | 2.31E-06 |
| At4g23140 | CRK6 (cysteine-rich RLK (RECEPTOR-like protein kinase) 6); Arabidopsis thaliana receptor-like protein kin       | -1.915 | 0.0003   |
| At4g23150 | CRK7 (cysteine-rich RLK (RECEPTOR-like protein kinase) 7); Encodes a cysteine-rich receptor-like protein k      | -1.876 | 0.01108  |
| At4g23180 | CRK10 (cysteine-rich RLK (RECEPTOR-like protein kinase) 10); Encodes a receptor-like protein kinase. Nan        | 1.002  | 0.00026  |
| At4g23190 | AT-RLK3 (RECEPTOR LIKE PROTEIN KINASE 3); Encodes putative receptor-like protein kinase that is inc             | 3.099  | 8.03E-10 |
| At4g23215 | pseudogene of cysteine-rich receptor-like protein kinase family protein; pseudogene of cysteine-rich receptor-l | 3.114  | 3.01E-08 |
| At4g23220 | CRK14 (cysteine-rich RLK (RECEPTOR-like protein kinase) 14); Encodes a cysteine-rich receptor-like protei       | 1.394  | 3.05E-05 |
| At4g23240 | CRK16 (cysteine-rich RLK (RECEPTOR-like protein kinase) 16); Encodes a cysteine-rich receptor-like protei       | -1.967 | 8.36E-08 |
| At4g23280 | CRK20 (cysteine-rich RLK (RECEPTOR-like protein kinase) 20); Encodes a cysteine-rich receptor-like protei       | 1.035  | 6.31E-05 |
| At4g23300 | CRK22 (cysteine-rich RLK (RECEPTOR-like protein kinase) 22); Encodes a cysteine-rich receptor-like protei       | -1.836 | 1.34E-07 |
| At4g23340 | 2-oxoglutarate (2OG) and Fe(II)-dependent oxygenase superfamily protein                                         | -1.238 | 7.52E-05 |
| At4g23450 | RING/U-box superfamily protein                                                                                  | 2.594  | 2.61E-09 |
| At4g23470 | PLAC8 family protein                                                                                            | 1.068  | 3.55E-05 |
| At4g23493 | unknown protein                                                                                                 | 6.822  | 9.73E-13 |
| At4g23550 | WRKY29 (WRKY family transcription factor); Encodes WRKY DNA-binding protein 29 (WRKY29).                        | -1.207 | 4.94E-07 |
| At4g23570 | SGT1A (phosphatase-related); Closely related to SGT1B, may function in SCF(TIR1) mediated protein degrad        | 3.005  | 5.81E-11 |
| At4g23700 | ATCHX17 (cation/H+ exchanger 17); member of Putative Na+/H+ antiporter family                                   | -1.796 | 2.79E-05 |
| At4g23720 | Protein of unknown function (DUF1191)                                                                           | -1.088 | 5.31E-05 |
| At4g23850 | LACS4 (long-chain acyl-CoA synthetase 4)                                                                        | 1.336  | 5.20E-08 |
| At4g23860 | PHD finger protein-related                                                                                      | 1.032  | 1.50E-06 |
| At4g23880 | unknown protein                                                                                                 | 2.143  | 8.32E-11 |

|           |                                                                                                                |        |          |
|-----------|----------------------------------------------------------------------------------------------------------------|--------|----------|
| At4g23885 | unknown protein                                                                                                | 2.515  | 3.20E-10 |
| At4g23895 | Pleckstrin homology (PH) domain-containing protein                                                             | 1.049  | 1.17E-06 |
| At4g23990 | ATCSLG3 (ARABIDOPSIS THALIANA CELLULOSE SYNTHASE-LIKE G3); encodes a protein similar to                        | 1.301  | 2.62E-06 |
| At4g24000 | ATCSLG2 (ARABIDOPSIS THALIANA CELLULOSE SYNTHASE LIKE G2); encodes a protein similar to                        | -1.46  | 0.0007   |
| At4g24020 | NLP7 (NIN like protein 7); Encodes NIN Like Protein 7 (NLP7). Modulates nitrate sensing and metabolism.        | 1.545  | 5.99E-08 |
| At4g24110 | unknown protein                                                                                                | 1.317  | 0.01262  |
| At4g24120 | ATYSL1 (YELLOW STRIPE LIKE 1); Member of a small family of oligopeptide transporters similar to the ye         | -1.725 | 8.38E-06 |
| At4g24130 | Protein of unknown function, DUF538                                                                            | -1.21  | 3.88E-06 |
| At4g24160 | alpha/beta-Hydrolases superfamily protein; Encodes a soluble lysophosphatidic acid acyltransferase with addit  | 3.624  | 1.30E-10 |
| At4g24170 | ATP binding microtubule motor family protein                                                                   | 2.099  | 3.70E-08 |
| At4g24370 | unknown protein                                                                                                | 1      | 9.12E-07 |
| At4g24380 | INVOLVED IN: 10-formyltetrahydrofolate biosynthetic process, folic acid and derivative biosynthetic process    | 3.262  | 6.56E-09 |
| At4g24410 | unknown protein                                                                                                | 2.031  | 3.03E-06 |
| At4g24415 | MIR824A (microRNA824A); Encodes a microRNA that targets AGL16. MicroRNAs are regulatory RNAs wit               | 3.573  | 3.38E-10 |
| At4g24420 | RNA-binding (RRM/RBD/RNP motifs) family protein                                                                | 1.937  | 3.23E-07 |
| At4g24430 | Rhamnogalacturonate lyase family protein                                                                       | 2.145  | 0.00023  |
| At4g24510 | CER2 (ECERIFERUM 2); Involved in C28 to C30 fatty acid elongation.                                             | -1.102 | 0.0164   |
| At4g24570 | DIC2 (dicarboxylate carrier 2); Encodes one of the mitochondrial dicarboxylate carriers (DIC): DIC1 (AT2G22    | 1.45   | 0.00041  |
| At4g24760 | alpha/beta-Hydrolases superfamily protein                                                                      | 1.225  | 9.17E-09 |
| At4g24890 | ATPAP24 (ARABIDOPSIS THALIANA PURPLE ACID PHOSPHATASE 24)                                                      | -1.7   | 4.18E-05 |
| At4g24920 | secE/sec61-gamma protein transport protein                                                                     | 1.663  | 1.34E-08 |
| At4g25000 | AMY1 (alpha-amylase-like); Predicted to be secreted protein based on signalP prediction. Involved in starch m  | -1.643 | 0.00057  |
| At4g25030 | unknown protein                                                                                                | 1.915  | 3.78E-09 |
| At4g25090 | Riboflavin synthase-like superfamily protein                                                                   | 2.708  | 8.08E-11 |
| At4g25110 | AtMC2 (metacaspase 2)                                                                                          | -1.007 | 0.0032   |
| At4g25130 | PMSR4 (peptide met sulfoxide reductase 4); Encodes a chloroplast-localized methionine sulfoxide reductase tl   | 1.179  | 8.16E-08 |
| At4g25190 | Family of unknown function (DUF566)                                                                            | 2.169  | 2.02E-06 |
| At4g25200 | ATHSP23.6-MITO (mitochondrion-localized small heat shock protein 23.6); AtHSP23.6-mito mRNA, nuclear           | 10.493 | 4.81E-11 |
| At4g25225 | unknown protein                                                                                                | 1.76   | 8.67E-08 |
| At4g25260 | Plant invertase/pectin methylesterase inhibitor superfamily protein                                            | -2.034 | 2.43E-07 |
| At4g25290 | DNA photolyases                                                                                                | 1.021  | 9.23E-06 |
| At4g25340 | FKBP53 (FK506 BINDING PROTEIN 53); Encodes a member of the FKBP-type immunophilin family that fu               | 1.946  | 2.75E-07 |
| At4g25350 | SHB1 (SHORT HYPOCOTYL UNDER BLUE1); SHB1 encodes a nuclear and cytosolic protein that has moti                 | 3.327  | 8.73E-10 |
| At4g25380 | SAP10 (stress-associated protein 10)                                                                           | 7.129  | 9.57E-12 |
| At4g25470 | CBF2 (C-repeat/DRE binding factor 2); Encodes a member of the DREB subfamily A-1 of ERF/AP2 transcrip          | -2.003 | 4.87E-08 |
| At4g25480 | CBF3 (C-REPEAT BINDING FACTOR 3); encodes a member of the DREB subfamily A-1 of ERF/AP2 trans                  | -2.388 | 2.13E-09 |
| At4g25490 | CBF1 (C-repeat/DRE binding factor 1); Transcriptional activator that binds to the DRE/CRT regulatory eleme     | -2.675 | 4.66E-09 |
| At4g25540 | MSH3 (homolog of DNA mismatch repair protein MSH3); encodes a DNA mismatch repair homolog of huma              | 1.576  | 0.00056  |
| At4g25560 | AtMYB18 (myb domain protein 18); Member of the R2R3 factor gene family.                                        | 3.894  | 3.29E-11 |
| At4g25690 | unknown protein                                                                                                | 1.39   | 1.66E-08 |
| At4g25700 | BCH1 (BETA CAROTENOID HYDROXYLASE 1); Converts beta-carotene to zeaxanthin via cryptoxanthin.                  | 1.538  | 4.73E-07 |
| At4g25780 | CAP (Cysteine-rich secretory proteins, Antigen 5, and Pathogenesis-related 1 protein) superfamily protein      | -1.237 | 1.76E-05 |
| At4g25810 | XTH23 (xyloglucan endotransglucosylase/hydrolase 23); xyloglucan endotransglycosylase-related protein (XT      | 2.78   | 3.87E-05 |
| At4g25820 | XTH14 (xyloglucan endotransglucosylase/hydrolase 14); Encodes a xyloglucan endotransglycosylase with a cl      | 1.454  | 0.02433  |
| At4g25835 | P-loop containing nucleoside triphosphate hydrolases superfamily protein                                       | -1.221 | 2.22E-06 |
| At4g25900 | Galactose mutarotase-like superfamily protein                                                                  | 1.031  | 7.51E-07 |
| At4g25990 | CIL (CCT motif family protein); chloroplast import apparatus CIA2-like. CIA2 is a transcription factor which i | -1.109 | 6.00E-06 |
| At4g26095 | other RNA; Potential natural antisense gene, locus overlaps with AT4G26090                                     | -1.18  | 1.20E-06 |
| At4g26140 | BGAL12 (beta-galactosidase 12); putative beta-galactosidase                                                    | 2.819  | 8.37E-11 |
| At4g26200 | ACS7 (1-amino-cyclopropane-1-carboxylate synthase 7); Member of a family of proteins in Arabidopsis that e     | 2.319  | 0.00012  |
| At4g26255 | other RNA; Unknown gene                                                                                        | -1.852 | 1.01E-06 |
| At4g26270 | PFK3 (phosphofruktokinase 3)                                                                                   | 3.251  | 5.50E-09 |
| At4g26320 | AGP13 (arabinogalactan protein 13)                                                                             | -1.025 | 0.001    |
| At4g26450 | unknown protein                                                                                                | 1.87   | 8.27E-05 |
| At4g26488 | other RNA; Potential natural antisense gene, locus overlaps with AT4G26490                                     | 2.259  | 7.57E-09 |
| At4g26490 | Late embryogenesis abundant (LEA) hydroxyproline-rich glycoprotein family                                      | -1.029 | 5.50E-08 |
| At4g26530 | Aldolase superfamily protein                                                                                   | -1.211 | 0.0188   |
| At4g26540 | Leucine-rich repeat receptor-like protein kinase family protein                                                | -1.258 | 1.10E-05 |
| At4g26580 | RING/U-box superfamily protein                                                                                 | 1.133  | 5.77E-05 |
| At4g26670 | Mitochondrial import inner membrane translocase subunit Tim17/Tim22/Tim23 family protein                       | -1.298 | 4.92E-05 |
| At4g26740 | ATPXG1 (ARABIDOPSIS THALIANA PEROXYGENASE 1); Encodes caleosin, a 27-kDa protein found wit                     | 1.996  | 4.45E-09 |
| At4g26750 | hydroxyproline-rich glycoprotein family protein                                                                | 1.325  | 4.60E-06 |
| At4g26780 | AR192 (Co-chaperone GrpE family protein); unknown function                                                     | 1.322  | 5.44E-07 |
| At4g26790 | GDSL-like Lipase/Acylhydrolase superfamily protein                                                             | 2.445  | 2.34E-08 |
| At4g26830 | O-Glycosyl hydrolases family 17 protein                                                                        | -1.41  | 1.52E-05 |
| At4g26950 | Protein of unknown function, DUF584                                                                            | 1.235  | 0.00071  |
| At4g26990 | unknown protein                                                                                                | 3.344  | 4.00E-10 |

|           |                                                                                                                 |        |          |
|-----------|-----------------------------------------------------------------------------------------------------------------|--------|----------|
| At4g27020 | unknown protein                                                                                                 | 1.427  | 4.08E-06 |
| At4g27030 | FAD4 (FATTY ACID DESATURASE 4); Encodes an unusual palmitate desaturase that is highly substrate spe            | 2.789  | 8.10E-09 |
| At4g27350 | Protein of unknown function (DUF1223)                                                                           | 2.544  | 1.53E-11 |
| At4g27360 | Dynein light chain type 1 family protein                                                                        | 5.545  | 4.81E-10 |
| At4g27370 | ATVIIIIB (MYOSIN VIII B); member of Myosin-like proteins                                                        | 1.417  | 2.66E-08 |
| At4g27410 | ANAC072 (Arabidopsis NAC domain containing protein 72); Encodes a NAC transcription factor induced in 1         | 1.037  | 0.00147  |
| At4g27440 | PORB (protochlorophyllide oxidoreductase B); light-dependent NADPH:protochlorophyllide oxidoreductase E         | -1.827 | 0.0167   |
| At4g27580 | unknown protein                                                                                                 | 2.806  | 2.92E-09 |
| At4g27595 | Plant protein of unknown function (DUF827)                                                                      | -1.152 | 9.19E-07 |
| At4g27652 | unknown protein                                                                                                 | 3.129  | 9.40E-11 |
| At4g27657 | unknown protein                                                                                                 | 3.584  | 8.20E-09 |
| At4g27660 | unknown protein                                                                                                 | 1.585  | 1.38E-07 |
| At4g27670 | HSP21 (heat shock protein 21); chloroplast located small heat shock protein.                                    | 11.576 | 2.40E-11 |
| At4g27680 | P-loop containing nucleoside triphosphate hydrolases superfamily protein                                        | 1.804  | 6.60E-10 |
| At4g27790 | Calcium-binding EF hand family protein                                                                          | 1.942  | 2.19E-08 |
| At4g27830 | BGLU10 (beta glucosidase 10)                                                                                    | 1.423  | 1.45E-08 |
| At4g27890 | HSP20-like chaperones superfamily protein                                                                       | 3.079  | 6.04E-09 |
| At4g27940 | ATMTM1 (ARABIDOPSIS MANGANESE TRACKING FACTOR FOR MITOCHONDRIAL SOD2)                                           | 2.742  | 1.41E-11 |
| At4g27980 | Domain of unknown function (DUF3444)                                                                            | 1.12   | 1.06E-05 |
| At4g28000 | P-loop containing nucleoside triphosphate hydrolases superfamily protein                                        | -1.115 | 2.04E-06 |
| At4g28040 | nodulin MtN21 /EamA-like transporter family protein                                                             | -2.101 | 0.0005   |
| At4g28085 | unknown protein                                                                                                 | 1.296  | 0.0007   |
| At4g28240 | Wound-responsive family protein                                                                                 | -1.696 | 2.36E-07 |
| At4g28270 | RMA2 (RING membrane-anchor 2); Encodes a RING finger E3 ubiquitin ligase. Binds and ubiquitinates ABP           | -1.11  | 7.01E-05 |
| At4g28350 | Concanavalin A-like lectin protein kinase family protein                                                        | 4.592  | 9.33E-12 |
| At4g28380 | Leucine-rich repeat (LRR) family protein                                                                        | 1.376  | 3.48E-06 |
| At4g28390 | AAC3 (ADP/ATP carrier 3); Encodes a mitochondrial ADP/ATP carrier protein. Shown in heterologous system         | 3.308  | 2.59E-10 |
| At4g28395 | A7 (ANTHER 7); related to lipid transfer proteins                                                               | 1.617  | 7.52E-09 |
| At4g28400 | Protein phosphatase 2C family protein                                                                           | 2.833  | 2.99E-11 |
| At4g28460 | unknown protein                                                                                                 | 1.72   | 4.33E-05 |
| At4g28480 | DNAJ heat shock family protein                                                                                  | 3.087  | 2.22E-11 |
| At4g28700 | AMT1.4 (ammonium transporter 1.4)                                                                               | 1.166  | 3.61E-05 |
| At4g28703 | RmlC-like cupins superfamily protein                                                                            | 1.253  | 0.0005   |
| At4g28780 | GDSL-like Lipase/Acylhydrolase superfamily protein                                                              | -1.429 | 9.73E-07 |
| At4g29030 | Putative membrane lipoprotein                                                                                   | -1.334 | 5.17E-05 |
| At4g29070 | Phospholipase A2 family protein                                                                                 | 2.278  | 7.47E-10 |
| At4g29180 | RHS16 (root hair specific 16)                                                                                   | 1.523  | 1.16E-05 |
| At4g29260 | HAD superfamily, subfamily IIIB acid phosphatase                                                                | -1.031 | 2.93E-08 |
| At4g29330 | DER1 (DERLIN-1)                                                                                                 | 2.047  | 8.89E-10 |
| At4g29340 | PRF4 (profilin 4); Profilin is a low-molecular weight, actin monomer-binding protein that regulates the organiz | 5.889  | 2.47E-13 |
| At4g29420 | F-box/RNI-like superfamily protein                                                                              | 1.374  | 3.01E-08 |
| At4g29450 | Leucine-rich repeat protein kinase family protein                                                               | 1.091  | 5.11E-05 |
| At4g29470 | Phospholipase A2 family protein                                                                                 | 1.816  | 1.85E-08 |
| At4g29520 | LOCATED IN: endoplasmic reticulum, plasma membrane                                                              | 1.05   | 5.05E-06 |
| At4g29610 | Cytidine/deoxycytidylate deaminase family protein                                                               | -1.142 | 0.00013  |
| At4g29770 | unknown protein; Target of trans acting-siR480/255.                                                             | 3.323  | 8.26E-10 |
| At4g29780 | unknown protein                                                                                                 | 1.602  | 0.00032  |
| At4g29800 | PLP8 (PATATIN-like protein 8)                                                                                   | 1.605  | 1.08E-07 |
| At4g29905 | unknown protein                                                                                                 | 1.64   | 5.14E-06 |
| At4g30020 | PA-domain containing subtilase family protein                                                                   | -1.104 | 1.05E-06 |
| At4g30080 | ARF16 (auxin response factor 16); Involved in root cap cell differentiation. Gene expression is regulated by m  | -1.059 | 2.06E-06 |
| At4g30170 | Peroxidase family protein                                                                                       | -2.203 | 4.76E-06 |
| At4g30180 | sequence-specific DNA binding transcription factors                                                             | -1.707 | 3.87E-05 |
| At4g30190 | AHA2 (H(+)-ATPase 2); belongs to the P-type ATPase superfamily of cation-transporting ATPases, pumps pr         | -1.686 | 2.41E-07 |
| At4g30210 | ATR2 (P450 reductase 2); Encodes NADPH-cytochrome P450 reductase that catalyzes the first oxidative step        | 2.228  | 2.74E-09 |
| At4g30240 | Syntaxin/t-SNARE family protein                                                                                 | 1.644  | 7.79E-08 |
| At4g30280 | ATXTH18 (XYLOGLUCAN ENDOTRANSGLUCOSYLASE/HYDROLASE 18); Encodes a xyloglucan endc                               | 1.038  | 0.00158  |
| At4g30290 | ATXTH19 (XYLOGLUCAN ENDOTRANSGLUCOSYLASE/HYDROLASE 19); Encodes a xyloglucan endc                               | -2.069 | 2.51E-06 |
| At4g30300 | ATNAP15 (ARABIDOPSIS THALIANA NON-INTRINSIC ABC PROTEIN 15); member of NAP subfamily                            | 1.887  | 1.33E-08 |
| At4g30340 | ATDGK7 (diacylglycerol kinase 7); encodes a diacylglycerol kinase. Applying a specific diacylglycerol kinase    | 1.028  | 1.13E-06 |
| At4g30390 | unknown protein                                                                                                 | 2.546  | 5.05E-10 |
| At4g30450 | glycine-rich protein                                                                                            | 1.09   | 2.67E-06 |
| At4g30460 | glycine-rich protein                                                                                            | 2.259  | 2.26E-07 |
| At4g30490 | AFG1-like ATPase family protein                                                                                 | 1.425  | 1.10E-07 |
| At4g30510 | ATATG18B (ARABIDOPSIS THALIANA HOMOLOG OF YEAST AUTOPHAGY 18 (ATG18) B)                                         | 1.643  | 1.75E-08 |
| At4g30530 | Class I glutamine amidotransferase-like superfamily protein                                                     | 1.068  | 4.03E-06 |
| At4g30650 | Low temperature and salt responsive protein family                                                              | -2.008 | 7.98E-08 |

|           |                                                                                                                |        |          |
|-----------|----------------------------------------------------------------------------------------------------------------|--------|----------|
| At4g30660 | Low temperature and salt responsive protein family                                                             | -1.853 | 1.55E-07 |
| At4g30670 | Putative membrane lipoprotein                                                                                  | -1.286 | 0.00023  |
| At4g30690 | Translation initiation factor 3 protein                                                                        | -1.242 | 3.48E-07 |
| At4g30710 | Family of unknown function (DUF566)                                                                            | -1.834 | 1.89E-09 |
| At4g30850 | HHP2 (heptahelical transmembrane protein2); heptahelical transmembrane protein homologous to human adij        | 1.95   | 1.17E-07 |
| At4g31050 | Biotin/lipoate A/B protein ligase family                                                                       | -1.159 | 1.70E-06 |
| At4g31060 | Integrase-type DNA-binding superfamily protein; encodes a member of the DREB subfamily A-5 of ERF/AP2          | -1.05  | 3.79E-06 |
| At4g31248 | other RNA; Potential natural antisense gene, locus overlaps with AT4G31250                                     | -1.634 | 4.29E-06 |
| At4g31398 | other RNA; Potential natural antisense gene, locus overlaps with AT4G31400                                     | 1.688  | 3.56E-07 |
| At4g31500 | ATR4 (ALTERED TRYPTOPHAN REGULATION 4); Encodes an oxime-metabolizing enzyme in the biosyn                     | -2.091 | 1.53E-08 |
| At4g31520 | SDA1 family protein                                                                                            | 1.001  | 0.00014  |
| At4g31550 | WRKY11 (WRKY DNA-binding protein 11); member of WRKY Transcription Factor; Group II-d; negative re             | 1.269  | 2.54E-06 |
| At4g31615 | Transcriptional factor B3 family protein                                                                       | 4.242  | 1.75E-11 |
| At4g31670 | UBP18 (ubiquitin-specific protease 18)                                                                         | 1.572  | 3.51E-08 |
| At4g31730 | GDU1 (glutamine dumper 1); Glutamine dumper1 is a putative transmembrane protein. It is involved in glutar     | -1.026 | 0.0006   |
| At4g31820 | ENP (ENHANCER OF PINOID); A member of the NPY family genes (NPY1/AT4G31820, NPY2/AT2G1482                      | -1.528 | 4.45E-08 |
| At4g31850 | PGR3 (proton gradient regulation 3); encodes a protein containing 27 pentatrigo-peptide repeat (PPR) motifs    | -1.199 | 9.15E-07 |
| At4g31860 | Protein phosphatase 2C family protein                                                                          | 1.599  | 1.17E-09 |
| At4g31870 | ATGPX7 (GLUTATHIONE PEROXIDASE 7); Encodes glutathione peroxidase.                                             | 1.126  | 0.00016  |
| At4g31877 | MIR156C (microRNA156C); Encodes a microRNA that targets several SPL family members, including SPL3,            | 2.637  | 9.49E-09 |
| At4g31950 | CYP82C3 (cytochrome P450, family 82, subfamily C, polypeptide 3); member of CYP82C                             | 2.846  | 2.05E-06 |
| At4g31970 | CYP82C2 (cytochrome P450, family 82, subfamily C, polypeptide 2); member of CYP82C                             | 1.439  | 3.22E-05 |
| At4g32208 | heat shock protein 70 (Hsp 70) family protein                                                                  | 2.403  | 7.63E-09 |
| At4g32270 | Ubiquitin-like superfamily protein                                                                             | -1.036 | 5.23E-06 |
| At4g32280 | IAA29 (indole-3-acetic acid inducible 29); Auxin inducible protein.                                            | -3.356 | 2.50E-08 |
| At4g32290 | Core-2/I-branching beta-1,6-N-acetylglucosaminyltransferase family protein                                     | -1.181 | 3.84E-06 |
| At4g32340 | Tetratricopeptide repeat (TPR)-like superfamily protein                                                        | -3.15  | 1.76E-09 |
| At4g32460 | Protein of unknown function, DUF642                                                                            | -1.291 | 7.51E-06 |
| At4g32630 | ArfGap/RecO-like zinc finger domain-containing protein                                                         | 1.176  | 1.09E-05 |
| At4g32770 | ATSDX1 (SUCROSE EXPORT DEFECTIVE 1); Tocopherol cyclase involved in tocopherol (vitamin E)synth                | 2.403  | 6.06E-09 |
| At4g32810 | CCD8 (carotenoid cleavage dioxygenase 8); Encodes a protein with similarity to carotenoid cleaving deoxyger    | -2.016 | 0.0002   |
| At4g32880 | ATHB-8 (homeobox gene 8); member of homeodomain-leucine zipper family, acting as a differentiation-prom        | -1.06  | 5.65E-08 |
| At4g32890 | GATA9 (GATA transcription factor 9); Encodes a member of the GATA factor family of zinc finger transcript      | -1.131 | 7.15E-08 |
| At4g32990 | Transducin/WD40 repeat-like superfamily protein                                                                | -1.116 | 1.55E-06 |
| At4g33040 | Thioredoxin superfamily protein                                                                                | 2.401  | 1.60E-08 |
| At4g33070 | Thiamine pyrophosphate dependent pyruvate decarboxylase family protein                                         | 1.496  | 0.03471  |
| At4g33220 | ATPME44 (A. THALIANA PECTIN METHYLESTERASE 44)                                                                 | -1.577 | 1.41E-08 |
| At4g33440 | Pectin lyase-like superfamily protein                                                                          | 2.651  | 6.51E-10 |
| At4g33490 | Eukaryotic aspartyl protease family protein                                                                    | -1.694 | 2.44E-08 |
| At4g33625 | FUNCTIONS IN: molecular_function unknown; INVOLVED IN: biological_process unknown; LOCATED IN                  | -1.359 | 1.32E-08 |
| At4g33660 | unknown protein                                                                                                | 2.812  | 1.64E-08 |
| At4g33740 | unknown protein                                                                                                | -1.028 | 6.99E-06 |
| At4g33790 | CER4 (ECERIFERUM 4); Encodes an alcohol-forming fatty acyl-CoA reductase, involved in cuticular wax bic        | -1.115 | 0.00119  |
| At4g33860 | Glycosyl hydrolase family 10 protein                                                                           | 1.418  | 2.75E-08 |
| At4g33905 | Peroxisomal membrane 22 kDa (Mpv17/PMP22) family protein                                                       | 2.131  | 1.03E-09 |
| At4g33920 | Protein phosphatase 2C family protein                                                                          | 2.469  | 1.89E-09 |
| At4g33930 | Cupredoxin superfamily protein; Encodes a protein with 14.6% glycine residues, similar to hyphally regulated   | 1.519  | 0.00014  |
| At4g33940 | RING/U-box superfamily protein                                                                                 | 1.677  | 6.48E-08 |
| At4g33950 | ATOST1 (OPEN STOMATA 1); Encodes calcium-independent ABA-activated protein kinase, a member of SI              | 1.127  | 7.40E-07 |
| At4g33980 | BEST Arabidopsis thaliana protein match is: cold regulated gene 27 (TAIR:AT5G42900.2)                          | -2.238 | 7.65E-09 |
| At4g34100 | RING/U-box superfamily protein                                                                                 | 1.149  | 1.43E-05 |
| At4g34103 | pseudogene of protein binding / zinc ion binding protein; pseudogene of protein binding / zinc ion binding pro | 1.032  | 1.95E-06 |
| At4g34131 | UGT73B3 (UDP-glucosyl transferase 73B3)                                                                        | 1.647  | 4.83E-06 |
| At4g34135 | UGT73B2 (UDP-glucosyltransferase 73B2); The At4g34135 gene encodes a flavonol 7-O-glucosyltransferase          | 1.836  | 9.22E-06 |
| At4g34150 | Calcium-dependent lipid-binding (CaLB domain) family protein                                                   | 3.733  | 1.10E-09 |
| At4g34180 | Cyclase family protein                                                                                         | 2.086  | 6.10E-10 |
| At4g34240 | ALDH3 (aldehyde dehydrogenase 3); Aldehyde dehydrogenase induced by ABA and dehydration                        | 1.018  | 7.00E-07 |
| At4g34300 | Cupredoxin superfamily protein; Encodes protein with 14.7% glycine residues, similar to auxin response facto   | 2.951  | 2.09E-08 |
| At4g34310 | alpha/beta-Hydrolases superfamily protein                                                                      | 1.185  | 7.81E-08 |
| At4g34332 | other RNA; Potential natural antisense gene, locus overlaps with AT4G34330                                     | 1.066  | 3.24E-06 |
| At4g34390 | XLG2 (extra-large GTP-binding protein 2)                                                                       | 1.858  | 1.69E-07 |
| At4g34440 | Protein kinase superfamily protein                                                                             | 1.399  | 9.55E-09 |
| At4g34460 | AGB1 (GTP binding protein beta 1); Encodes the heterotrimeric G-protein beta subunit and is involved in org;   | 1.543  | 6.78E-09 |
| At4g34510 | KCS17 (3-ketoacyl-CoA synthase 17); Encodes KCS17, a member of the 3-ketoacyl-CoA synthase family invc         | 1.344  | 2.76E-07 |
| At4g34560 | unknown protein                                                                                                | -1.009 | 1.19E-05 |
| At4g34630 | unknown protein                                                                                                | 1.219  | 1.05E-07 |
| At4g34750 | SAUR-like auxin-responsive protein family                                                                      | -1.313 | 8.27E-05 |

|           |                                                                                                                |        |          |
|-----------|----------------------------------------------------------------------------------------------------------------|--------|----------|
| At4g34760 | SAUR-like auxin-responsive protein family                                                                      | -1.41  | 7.66E-06 |
| At4g34770 | SAUR-like auxin-responsive protein family                                                                      | -2.113 | 1.37E-07 |
| At4g34790 | SAUR-like auxin-responsive protein family                                                                      | -2.08  | 8.33E-09 |
| At4g34810 | SAUR-like auxin-responsive protein family                                                                      | -1.98  | 2.84E-06 |
| At4g34850 | LAP5 (LESS ADHESIVE POLLEN 5)                                                                                  | 1.929  | 3.82E-09 |
| At4g34880 | Amidase family protein                                                                                         | 2.211  | 1.95E-07 |
| At4g34950 | Major facilitator superfamily protein                                                                          | -1.704 | 8.56E-07 |
| At4g34980 | SLP2 (subtilisin-like serine protease 2); Serine protease similar to subtilisin.                               | -1.363 | 1.58E-06 |
| At4g35030 | Protein kinase superfamily protein                                                                             | -1.124 | 1.17E-06 |
| At4g35110 | Arabidopsis phospholipase-like protein (PEARLI 4) family                                                       | 2.516  | 2.94E-08 |
| At4g35180 | LHT7 (LYS/HIS transporter 7)                                                                                   | -1.009 | 0.01758  |
| At4g35250 | NAD(P)-binding Rossmann-fold superfamily protein                                                               | 1.211  | 2.18E-07 |
| At4g35270 | Plant regulator RWP-RK family protein                                                                          | -1.018 | 2.62E-06 |
| At4g35600 | CONNEXIN 32 (Protein kinase superfamily protein); plant-type connexin (gap junction-type protein), a comp      | 1.258  | 2.20E-07 |
| At4g35640 | ATSERAT3.2 (serine acetyltransferase 3.2); Encodes a cytosolic serine O-acetyltransferase involved in sulfur ; | 2.961  | 9.02E-09 |
| At4g35690 | Arabidopsis protein of unknown function (DUF241)                                                               | 2.173  | 7.67E-10 |
| At4g35720 | Arabidopsis protein of unknown function (DUF241)                                                               | -2.225 | 5.53E-07 |
| At4g35770 | ATSEN1 (ARABIDOPSIS THALIANA SENESCENCE 1); Senescence-associated gene that is strongly induce                 | -1.638 | 0.0018   |
| At4g35800 | NRPB1 (RNA polymerase II large subunit); Encodes the unique largest subunit of nuclear DNA-dependent RN        | 1.354  | 6.56E-05 |
| At4g35860 | ATGB2 (GTP-binding 2); GTP-binding protein ATGB2                                                               | 1.261  | 6.05E-09 |
| At4g35940 | unknown protein                                                                                                | 2.466  | 3.92E-09 |
| At4g35985 | Senescence/dehydration-associated protein-related                                                              | 1.397  | 3.16E-08 |
| At4g36040 | Chaperone DnaJ-domain superfamily protein                                                                      | -1.392 | 3.25E-07 |
| At4g36350 | ATPAP25 (ARABIDOPSIS THALIANA PURPLE ACID PHOSPHATASE 25)                                                      | -1.004 | 0.00033  |
| At4g36410 | UBC17 (ubiquitin-conjugating enzyme 17); ubiquitin-conjugating enzyme                                          | -1.658 | 2.39E-06 |
| At4g36470 | S-adenosyl-L-methionine-dependent methyltransferases superfamily protein                                       | -1.165 | 1.88E-07 |
| At4g36500 | unknown protein                                                                                                | 1.25   | 4.82E-06 |
| At4g36540 | BEE2 (BR enhanced expression 2)                                                                                | -2.216 | 1.31E-09 |
| At4g36570 | ATRL3 (RAD-like 3)                                                                                             | -1.188 | 4.04E-06 |
| At4g36600 | Late embryogenesis abundant (LEA) protein                                                                      | 1.812  | 1.02E-06 |
| At4g36640 | Sec14p-like phosphatidylinositol transfer family protein                                                       | 1.881  | 2.42E-08 |
| At4g36670 | Major facilitator superfamily protein                                                                          | -2.244 | 2.01E-09 |
| At4g36740 | ATHB40 (homeobox protein 40); Encodes a homeodomain leucine zipper class I (HD-Zip I) protein.                 | -1.248 | 0.0009   |
| At4g36770 | UDP-Glycosyltransferase superfamily protein                                                                    | -1.88  | 5.72E-07 |
| At4g36850 | PQ-loop repeat family protein / transmembrane family protein                                                   | -1.126 | 0.00092  |
| At4g36870 | BLH2 (BEL1-like homeodomain 2); Encodes a member of the BEL family of homeodomain proteins. Plants de          | -1.13  | 3.27E-05 |
| At4g36950 | MAPKKK21 (mitogen-activated protein kinase kinase kinase 21); member of MEKK subfamily                         | 1.237  | 0.00759  |
| At4g36988 | CPuORF49 (conserved peptide upstream open reading frame 49); Upstream open reading frames (uORFs) are          | 3.688  | 7.55E-10 |
| At4g36990 | AT-HSFB1 (ARABIDOPSIS THALIANA CLASS B HEAT SHOCK FACTOR B1); encodes a protein whose ;                        | 3.987  | 5.35E-10 |
| At4g37240 | unknown protein                                                                                                | -1.139 | 6.86E-05 |
| At4g37370 | CYP81D8 (cytochrome P450, family 81, subfamily D, polypeptide 8); member of CYP81D                             | 3.86   | 1.94E-09 |
| At4g37400 | CYP81F3 (cytochrome P450, family 81, subfamily F, polypeptide 3); member of CYP81F                             | -1.224 | 1.33E-05 |
| At4g37450 | AGP18 (arabinogalactan protein 18); AGP18 is a lysine-rich arabinogalactan-protein (AGP) and part of a mul     | -1.174 | 4.49E-06 |
| At4g37470 | alpha/beta-Hydrolases superfamily protein                                                                      | -1.742 | 1.47E-07 |
| At4g37540 | LBD39 (LOB domain-containing protein 39)                                                                       | -1.605 | 1.75E-08 |
| At4g37610 | BT5 (BTB and TAZ domain protein 5); BTB and TAZ domain protein. Located in cytoplasm and expressed in          | -1.149 | 0.0004   |
| At4g37620 | similar to RNase H domain-containing protein [Arabidopsis thaliana] (TAIR:AT4G09490.1); similar to 80C09       | -1.083 | 2.45E-05 |
| At4g37640 | ACA2 (calcium ATPase 2); Encodes a calmodulin-regulated Ca(2+)-pump located in the endoplasmic reticulu        | 1.114  | 1.25E-07 |
| At4g37685 | unknown protein                                                                                                | -1.114 | 5.81E-07 |
| At4g37760 | SQE3 (squalene epoxidase 3)                                                                                    | 1.24   | 2.67E-06 |
| At4g37790 | HAT22 (Homeobox-leucine zipper protein family); Encodes homeobox protein HAT22, member of the HD-Zi            | -1.458 | 2.91E-07 |
| At4g37890 | EDA40 (embryo sac development arrest 40)                                                                       | -1.095 | 1.83E-06 |
| At4g37900 | Protein of unknown function (duplicated DUF1399)                                                               | 2.407  | 2.83E-09 |
| At4g38030 | Rhamnogalacturonate lyase family protein                                                                       | 2.66   | 6.51E-12 |
| At4g38060 | unknown protein                                                                                                | 1.485  | 6.12E-07 |
| At4g38540 | FAD/NAD(P)-binding oxidoreductase family protein                                                               | 1.016  | 0.0019   |
| At4g38560 | Arabidopsis phospholipase-like protein (PEARLI 4) family                                                       | 2.072  | 3.20E-07 |
| At4g38620 | ATMYB4 (myb domain protein 4); Encodes a R2R3 MYB protein which is involved in the response to UV-B.           | -1.013 | 5.89E-05 |
| At4g38730 | Protein of unknown function (DUF803)                                                                           | 1.004  | 2.81E-07 |
| At4g38770 | ATPRP4 (ARABIDOPSIS THALIANA PROLINE-RICH PROTEIN 4); Encodes one of four proline-rich prote                   | -1.177 | 0.0005   |
| At4g38810 | Calcium-binding EF-hand family protein                                                                         | -1.197 | 4.16E-06 |
| At4g38825 | SAUR-like auxin-responsive protein family                                                                      | -1.087 | 0.0003   |
| At4g38840 | SAUR-like auxin-responsive protein family                                                                      | -1.214 | 2.10E-06 |
| At4g38850 | ATSAUR15 (ARABIDOPSIS THALIANA SMALL AUXIN UPREGULATED 15); mRNA is rapidly induced                            | -2.075 | 1.48E-07 |
| At4g38860 | SAUR-like auxin-responsive protein family                                                                      | -1.47  | 5.93E-06 |
| At4g38940 | Galactose oxidase/kelch repeat superfamily protein                                                             | 2.302  | 2.13E-09 |
| At4g39030 | EDS5 (ENHANCED DISEASE SUSCEPTIBILITY 5); Encodes an orphan multidrug and toxin extrusion trans                | 1.767  | 8.60E-05 |



|           |                                                                                                                |        |          |
|-----------|----------------------------------------------------------------------------------------------------------------|--------|----------|
| At4g39070 | B-box zinc finger family protein                                                                               | -1.399 | 1.92E-07 |
| At4g39090 | RD19 (RESPONSIVE TO DEHYDRATION 19); Similar to cysteine proteinases, induced by desiccation but n             | -1.598 | 0.0197   |
| At4g39180 | ATSEC14 (ARABIDOPSIS THALIANA SECRETION 14); encodes a protein that complements the function c                 | -1.106 | 7.19E-07 |
| At4g39230 | NmrA-like negative transcriptional regulator family protein; encodes a protein whose sequence is similar to ph | 2.505  | 1.51E-10 |
| At4g39235 | unknown protein                                                                                                | 2.157  | 9.00E-11 |
| At4g39250 | ATRL1 (RAD-like 1)                                                                                             | -1.23  | 0.00014  |
| At4g39360 | unknown protein                                                                                                | 2.325  | 3.78E-07 |
| At4g39370 | UBP27 (ubiquitin-specific protease 27); Encodes a ubiquitin-specific protease.                                 | 1.567  | 6.50E-10 |
| At4g39430 | NA                                                                                                             | 1.286  | 8.61E-07 |
| At4g39500 | CYP96A11 (cytochrome P450, family 96, subfamily A, polypeptide 11); member of CYP96A                           | 2.429  | 2.59E-07 |
| At4g39520 | GTP-binding protein-related; Encodes a member of the DRG (developmentally regulated G-protein) family. H       | 1.14   | 6.22E-08 |
| At4g39580 | Galactose oxidase/kelch repeat superfamily protein                                                             | 1.255  | 9.01E-05 |
| At4g39620 | ATPPR5 (A. THALIANA PENTATRICOPEPTIDE REPEAT 5)                                                                | -1.072 | 2.00E-06 |
| At4g39640 | GGT1 (gamma-glutamyl transpeptidase 1); The gene encodes a gamma-glutamyltransferase (AKA gamma-glu            | 2.113  | 3.44E-09 |
| At4g39670 | Glycolipid transfer protein (GLTP) family protein                                                              | 4.678  | 3.48E-07 |
| At4g39770 | Haloacid dehalogenase-like hydrolase (HAD) superfamily protein                                                 | -1.37  | 1.23E-06 |
| At4g39780 | Integrase-type DNA-binding superfamily protein; encodes a member of the DREB subfamily A-6 of ERF/AP2          | -1.578 | 1.66E-07 |
| At4g39890 | AtRABH1c (RAB GTPase homolog H1C)                                                                              | 2.862  | 3.25E-10 |
| At4g39940 | AKN2 (APS-kinase 2); adenosine-5'-phosphosulfate-kinase (akn2) mRNA, complete                                  | -2.606 | 9.93E-10 |
| At4g39950 | CYP79B2 (cytochrome P450, family 79, subfamily B, polypeptide 2); Belongs to cytochrome P450 and is invc       | -2.929 | 4.38E-08 |
| At4g40020 | Myosin heavy chain-related protein                                                                             | 2.39   | 6.81E-07 |
| At4g40065 | other RNA                                                                                                      | -1.657 | 1.71E-05 |
| At4g40070 | RING/U-box superfamily protein                                                                                 | -2.176 | 2.23E-08 |
| At4g40080 | ENTH/ANTH/VHS superfamily protein                                                                              | 1.523  | 3.44E-06 |
| At5g01060 | Protein kinase protein with tetratricopeptide repeat domain                                                    | 3.681  | 8.89E-10 |
| At5g01100 | O-fucosyltransferase family protein                                                                            | 2.1    | 2.23E-06 |
| At5g01180 | ATPTR5 (ARABIDOPSIS THALIANA PEPTIDE TRANSPORTER 5); Encodes a dipeptide transporter expre                     | 5.427  | 1.69E-12 |
| At5g01210 | HXXXD-type acyl-transferase family protein                                                                     | -1.51  | 6.52E-08 |
| At5g01215 | other RNA; Potential natural antisense gene, locus overlaps with AT5G01210                                     | -1.209 | 6.00E-06 |
| At5g01220 | SQD2 (sulfoquinovosyldiacylglycerol 2); involved in sulfolipid biosynthesis                                    | -1.275 | 9.24E-05 |
| At5g01250 | alpha 1,4-glycosyltransferase family protein                                                                   | 1.203  | 1.30E-05 |
| At5g01260 | Carbohydrate-binding-like fold                                                                                 | 1.325  | 2.59E-07 |
| At5g01380 | Homeodomain-like superfamily protein                                                                           | 1.143  | 0.00409  |
| At5g01450 | RING/U-box superfamily protein                                                                                 | 2.212  | 9.81E-12 |
| At5g01480 | Cysteine/Histidine-rich C1 domain family protein                                                               | 2.017  | 7.54E-10 |
| At5g01540 | LECRKA4.1 (lectin receptor kinase a4.1); Encodes LecRKA4.1, a member of the lectin receptor kinase subfan      | 1.502  | 2.33E-05 |
| At5g01700 | Protein phosphatase 2C family protein                                                                          | 2.175  | 8.29E-10 |
| At5g01720 | RNI-like superfamily protein                                                                                   | 1.47   | 4.92E-06 |
| At5g01760 | ENTH/VHS/GAT family protein                                                                                    | 1.011  | 2.16E-05 |
| At5g01830 | ARM repeat superfamily protein                                                                                 | 1.266  | 2.13E-07 |
| At5g01950 | Leucine-rich repeat protein kinase family protein                                                              | 1.359  | 0.0027   |
| At5g02160 | unknown protein                                                                                                | -1.947 | 2.51E-08 |
| At5g02190 | ATASP38 (ARABIDOPSIS THALIANA ASPARTIC PROTEASE 38); encodes an aspartic protease, has an in                   | -1.36  | 3.87E-07 |
| At5g02200 | FHL (far-red-elongated hypocotyl1-like); Encodes a small plant-specific protein with both nuclear localization | -1.037 | 8.51E-05 |
| At5g02230 | Haloacid dehalogenase-like hydrolase (HAD) superfamily protein                                                 | 1.581  | 2.72E-06 |
| At5g02260 | ATEXPA9 (expansin A9); member of Alpha-Expansin Gene Family. Naming convention from the Expansin V             | -1.843 | 4.94E-08 |
| At5g02290 | NAK (Protein kinase superfamily protein); Encodes a candidate protein kinase NAK that is similar to the onco   | 1.118  | 4.42E-05 |
| At5g02410 | DIE2/ALG10 family                                                                                              | -1.116 | 3.89E-07 |
| At5g02430 | Transducin/WD40 repeat-like superfamily protein                                                                | 1.936  | 2.72E-10 |
| At5g02480 | HSP20-like chaperones superfamily protein                                                                      | -1.569 | 6.55E-07 |
| At5g02490 | Heat shock protein 70 (Hsp 70) family protein                                                                  | 3.38   | 8.02E-08 |
| At5g02640 | unknown protein                                                                                                | -1.126 | 7.07E-07 |
| At5g02750 | RING/U-box superfamily protein                                                                                 | -1.003 | 6.68E-06 |
| At5g02760 | Protein phosphatase 2C family protein                                                                          | -2.291 | 3.45E-09 |
| At5g02780 | GSTL1 (glutathione transferase lambda 1); Encodes a member of the lambda family of glutathione transferases    | 2.309  | 0.00125  |
| At5g02800 | Protein kinase superfamily protein                                                                             | 1.276  | 1.11E-08 |
| At5g02820 | BIN5 (BRASSINOSTEROID INSENSITIVE 5); Involved in the patterning and shape of leaf trichomes. Encod            | 1.308  | 2.93E-07 |
| At5g02840 | LCL1 (LHY/CCA1-like 1); CCA1 and LHY colocalize in the nucleus and form heterodimers in vivo. CCA1 ar          | 1.272  | 4.30E-07 |
| At5g02890 | HXXXD-type acyl-transferase family protein                                                                     | -1.071 | 1.49E-05 |
| At5g03010 | Galactose oxidase/kelch repeat superfamily protein                                                             | 2.577  | 4.20E-11 |
| At5g03020 | Galactose oxidase/kelch repeat superfamily protein                                                             | 1.048  | 1.02E-05 |
| At5g03030 | Chaperone DnaJ-domain superfamily protein                                                                      | 1.304  | 5.45E-07 |
| At5g03120 | unknown protein                                                                                                | -1.407 | 2.82E-05 |
| At5g03160 | ATP58IPK (homolog of mamallian P58IPK); J domain protein localized in ER lumen. Can partially compensat        | -1.046 | 1.58E-05 |
| At5g03210 | unknown protein                                                                                                | 3.985  | 6.46E-08 |
| At5g03230 | Protein of unknown function, DUF584                                                                            | -1.249 | 6.55E-07 |
| At5g03285 | other RNA                                                                                                      | 2.603  | 1.61E-10 |

|           |                                                                                                                                          |        |          |
|-----------|------------------------------------------------------------------------------------------------------------------------------------------|--------|----------|
| At5g03330 | Cysteine proteinases superfamily protein                                                                                                 | 1.172  | 5.17E-08 |
| At5g03340 | ATPase, AAA-type, CDC48 protein                                                                                                          | 2.603  | 5.20E-10 |
| At5g03370 | acylphosphatase family                                                                                                                   | 1.465  | 1.29E-07 |
| At5g03380 | Heavy metal transport/detoxification superfamily protein                                                                                 | 1.858  | 2.07E-07 |
| At5g03406 | Class II aaRS and biotin synthetases superfamily protein                                                                                 | 1.111  | 2.61E-07 |
| At5g03435 | Ca <sup>2+</sup> -dependent plant phosphoribosyltransferase family protein (Ca <sup>2+</sup> -dependent plant phosphoribosyltransferase) | 3.588  | 1.50E-11 |
| At5g03490 | UDP-Glycosyltransferase superfamily protein                                                                                              | 1.175  | 6.61E-06 |
| At5g03495 | RNA-binding (RRM/RBD/RNP motifs) family protein                                                                                          | 2.066  | 3.14E-08 |
| At5g03552 | MIR822A (microRNA822A); Encodes a microRNA of unknown function. MicroRNAs are regulatory RNAs w                                          | -1.856 | 2.10E-08 |
| At5g03555 | permease, cytosine/purines, uracil, thiamine, allantoin family protein                                                                   | 1.248  | 7.15E-07 |
| At5g03560 | Tetratricopeptide repeat (TPR)-like superfamily protein                                                                                  | 1.352  | 1.48E-07 |
| At5g03610 | GDSL-like Lipase/Acylhydrolase superfamily protein                                                                                       | 1.2    | 3.02E-07 |
| At5g03630 | ATMDAR2 (Pyridine nucleotide-disulphide oxidoreductase family protein)                                                                   | 1.046  | 0.0002   |
| At5g03740 | HD2C (histone deacetylase 2C); HD2-type histone deacetylase HDAC. Involved in the ABA and stress respon                                  | 1.308  | 5.42E-06 |
| At5g03960 | IQD12 (IQ-domain 12)                                                                                                                     | -1.147 | 1.92E-05 |
| At5g03990 | unknown protein                                                                                                                          | 3.662  | 5.06E-11 |
| At5g03995 | unknown protein                                                                                                                          | -1.352 | 9.06E-08 |
| At5g04190 | PKS4 (phytochrome kinase substrate 4); Encodes phytochrome kinase substrate 4, a phytochrome signaling co                                | -1.339 | 1.33E-05 |
| At5g04220 | SYT3 (synaptotagmin 3)                                                                                                                   | -1.282 | 1.29E-06 |
| At5g04230 | PAL3 (phenyl alanine ammonia-lyase 3); Member of Phenylalanine ammonia-lyase (PAL) gene family. Differs                                  | -1.944 | 2.83E-07 |
| At5g04340 | CZF2 (COLD INDUCED ZINC FINGER PROTEIN 2); putative c2h2 zinc finger transcription factor mRNA,                                          | 2.77   | 3.90E-09 |
| At5g04360 | ATLDA (limit dextrinase); Encodes an enzyme thought to be involved in the hydrolysis of the &#945;-1,6 link                              | -1.12  | 1.06E-07 |
| At5g04410 | anac078 (Arabidopsis NAC domain containing protein 78); NAC family member, functions as a transcriptiona                                 | 1.945  | 8.79E-09 |
| At5g04610 | S-adenosyl-L-methionine-dependent methyltransferases superfamily protein                                                                 | 3.083  | 1.27E-10 |
| At5g04720 | ADR1-L2 (ADR1-like 2)                                                                                                                    | 1.14   | 0.0003   |
| At5g04750 | F1F0-ATPase inhibitor protein, putative                                                                                                  | 1.383  | 0.0003   |
| At5g04770 | ATCAT6 (ARABIDOPSIS THALIANA CATIONIC AMINO ACID TRANSPORTER 6); Encodes a member of                                                     | -1.116 | 2.13E-06 |
| At5g04830 | Nuclear transport factor 2 (NTF2) family protein                                                                                         | 1.096  | 5.53E-08 |
| At5g04840 | bZIP protein                                                                                                                             | 2.853  | 1.58E-11 |
| At5g04890 | RTM2 (RESTRICTED TEV MOVEMENT 2); Specifically restricts the long-distance movement of tobacco et                                        | 1.194  | 8.98E-06 |
| At5g04930 | ALA1 (aminophospholipid ATPase 1); Encodes a putative aminophospholipid translocase (p-type ATPase) in                                   | 1.456  | 2.64E-06 |
| At5g05090 | Homeodomain-like superfamily protein                                                                                                     | -1.247 | 1.19E-07 |
| At5g05160 | Leucine-rich repeat protein kinase family protein                                                                                        | -1.023 | 2.13E-05 |
| At5g05220 | unknown protein                                                                                                                          | 7.694  | 1.74E-13 |
| At5g05270 | Chalcone-flavanone isomerase family protein                                                                                              | 1.045  | 0.01395  |
| At5g05300 | unknown protein                                                                                                                          | 2.753  | 2.90E-06 |
| At5g05340 | Peroxidase superfamily protein                                                                                                           | -1.286 | 0.00863  |
| At5g05410 | DREB2 (DEHYDRATION-RESPONSIVE ELEMENT BINDING PROTEIN 2); Encodes a transcription factor                                                 | 5.06   | 3.57E-11 |
| At5g05420 | FKBP-like peptidyl-prolyl cis-trans isomerase family protein                                                                             | -1.842 | 2.87E-07 |
| At5g05480 | Peptide-N4-(N-acetyl-beta-glucosaminyl)asparagine amidase A protein                                                                      | 1.296  | 8.02E-08 |
| At5g05490 | DIF1 (DETERMINE, INFERTILE 1); Encodes a RAD21-like gene essential for meiosis. Encodes a 627 a.a                                        | 2.939  | 1.52E-08 |
| At5g05850 | PIRL1 (plant intracellular ras group-related LRR 1); Encodes PIRL1, a member of the Plant Intracellular Ras-g                            | 1.72   | 4.02E-08 |
| At5g05890 | UDP-Glycosyltransferase superfamily protein                                                                                              | -1.466 | 1.38E-05 |
| At5g05960 | Bifunctional inhibitor/lipid-transfer protein/seed storage 2S albumin superfamily protein                                                | -1.032 | 6.27E-05 |
| At5g06250 | AP2/B3-like transcriptional factor family protein                                                                                        | 1.236  | 1.73E-05 |
| At5g06278 | pseudogene of abscisic acid-responsive HVA22 family protein; pseudogene of abscisic acid-responsive HVA2                                 | -1.023 | 7.81E-05 |
| At5g06280 | unknown protein                                                                                                                          | 1.199  | 6.54E-07 |
| At5g06320 | NHL3 (NDR1/HIN1-like 3); encodes a protein whose sequence is similar to tobacco hairpin-induced gene (HII                                | 1.602  | 6.96E-06 |
| At5g06470 | Glutaredoxin family protein                                                                                                              | -1.574 | 8.72E-07 |
| At5g06480 | Immunoglobulin E-set superfamily protein                                                                                                 | -1.15  | 3.42E-06 |
| At5g06570 | alpha/beta-Hydrolases superfamily protein                                                                                                | -1.422 | 1.02E-05 |
| At5g06690 | WCRKC1 (WCRKC thioredoxin 1); Encodes a thioredoxin (WCRKC1) localized in chloroplast stroma. Cont                                       | -2.342 | 1.12E-07 |
| At5g06720 | ATPA2 (peroxidase 2)                                                                                                                     | -1.176 | 6.81E-05 |
| At5g06750 | Protein phosphatase 2C family protein                                                                                                    | 1.823  | 8.45E-10 |
| At5g06800 | myb-like HTH transcriptional regulator family protein                                                                                    | -1.285 | 2.80E-07 |
| At5g06820 | SRF2 (STRUBBELIG-receptor family 2)                                                                                                      | 5.051  | 2.50E-12 |
| At5g06850 | C2 calcium/lipid-binding plant phosphoribosyltransferase family protein                                                                  | -1.222 | 1.76E-06 |
| At5g06870 | ATPGIP2 (ARABIDOPSIS POLYGALACTURONASE INHIBITING PROTEIN 2); Encodes a polygalacturon                                                   | -1.336 | 2.30E-05 |
| At5g06960 | OBF5 (OCS-element binding factor 5); Encodes a basic leucine zipper (B-ZIP) containing protein that interact                             | 1.474  | 4.48E-08 |
| At5g06980 | unknown protein                                                                                                                          | 1.489  | 4.52E-07 |
| At5g06990 | Protein of unknown function, DUF617                                                                                                      | -1.059 | 0.00178  |
| At5g07100 | WRKY26 (WRKY DNA-binding protein 26); Encodes WRKY DNA-binding protein 26 (WRKY26).                                                      | -1.366 | 5.25E-06 |
| At5g07110 | PRA1.B6 (prenylated RAB acceptor 1.B6)                                                                                                   | -1.462 | 3.90E-07 |
| At5g07330 | unknown protein                                                                                                                          | 6.73   | 3.78E-14 |
| At5g07560 | GRP20 (glycine-rich protein 20); Lipid-binding oleosins, glycine-rich protein.                                                           | -1.127 | 1.41E-05 |
| At5g07670 | RNI-like superfamily protein                                                                                                             | -1.047 | 5.76E-07 |
| At5g07690 | ATMYB29 (myb domain protein 29); Encodes a putative transcription factor (MYB29).                                                        | -3.65  | 1.70E-09 |

|           |                                                                                                                  |        |          |
|-----------|------------------------------------------------------------------------------------------------------------------|--------|----------|
| At5g07700 | AtMYB76 (myb domain protein 76); Encodes a putative transcription factor (MYB76).                                | -2.531 | 3.49E-08 |
| At5g07850 | HXXXD-type acyl-transferase family protein                                                                       | -1.007 | 0.00282  |
| At5g08010 | unknown protein                                                                                                  | -1.149 | 1.68E-07 |
| At5g08030 | PLC-like phosphodiesterases superfamily protein                                                                  | -2.179 | 0.00016  |
| At5g08139 | RING/U-box superfamily protein                                                                                   | 1.508  | 1.18E-07 |
| At5g08350 | GRAM domain-containing protein / ABA-responsive protein-related                                                  | -1.492 | 2.01E-06 |
| At5g08380 | AGAL1 (alpha-galactosidase 1)                                                                                    | 1.074  | 3.15E-08 |
| At5g08440 | unknown protein                                                                                                  | 1.096  | 7.64E-07 |
| At5g08520 | Duplicated homeodomain-like superfamily protein                                                                  | -1.042 | 7.21E-08 |
| At5g08695 | RNA-binding (RRM/RBD/RNP motifs) family protein                                                                  | 1.009  | 4.56E-06 |
| At5g08790 | anac081 (Arabidopsis NAC domain containing protein 81); induced by wounding, belongs to a large family of        | 2.29   | 2.83E-08 |
| At5g09280 | Pectin lyase-like superfamily protein                                                                            | 1.445  | 6.55E-07 |
| At5g09430 | alpha/beta-Hydrolases superfamily protein                                                                        | 2.32   | 5.29E-08 |
| At5g09590 | HSC70-5 (HEAT SHOCK COGNATE); heat shock protein 70 (Hsc70-5); nuclear                                           | 2.209  | 2.39E-09 |
| At5g09610 | APUM21 (pumilio 21); Encodes a member of the Arabidopsis Pumilio (APUM) proteins containing PUF dom.             | 1.773  | 2.66E-08 |
| At5g09730 | ATBXL3 (BETA-XYLOSIDASE 3); encodes a protein similar to a beta-xylosidase located in the extracellular          | -1.997 | 3.69E-06 |
| At5g09800 | ARM repeat superfamily protein                                                                                   | 1.708  | 3.44E-07 |
| At5g09805 | IDL3 (inflorescence deficient in abscission (IDA)-like 3); Similar to Inflorescence deficient in abscission (IDA | -1.152 | 3.57E-07 |
| At5g09930 | ATGCN2 (ARABIDOPSIS THALIANA GENERAL CONTROL NON-REPRESSIBLE 2); member of GCN st                                | 6.683  | 4.02E-12 |
| At5g09940 | Protein of unknown function (DUF1635)                                                                            | 1.65   | 4.04E-06 |
| At5g09990 | PROPEP5 (elicitor peptide 5 precursor)                                                                           | 1.644  | 1.90E-08 |
| At5g10000 | ATFD4 (ferredoxin 4)                                                                                             | 1.543  | 2.10E-07 |
| At5g10180 | AST68 (ARABIDOPSIS SULFATE TRANSPORTER 68); Encodes a low-affinity sulfate transporter expresse                  | -1.048 | 6.60E-06 |
| At5g10190 | Major facilitator superfamily protein                                                                            | 1.396  | 9.49E-09 |
| At5g10336 | unknown protein                                                                                                  | 2.692  | 1.85E-10 |
| At5g10340 | F-box family protein                                                                                             | 1.633  | 8.08E-08 |
| At5g10390 | Histone superfamily protein                                                                                      | -1.259 | 2.05E-05 |
| At5g10400 | Histone superfamily protein                                                                                      | -1.217 | 1.54E-05 |
| At5g10410 | ENTH/ANTH/VHS superfamily protein                                                                                | 1.339  | 3.18E-07 |
| At5g10430 | AGP4 (arabinogalactan protein 4); Encodes arabinogalactan-protein (AGP4).                                        | -1.283 | 7.81E-05 |
| At5g10530 | Concanavalin A-like lectin protein kinase family protein                                                         | -1.043 | 1.30E-05 |
| At5g10570 | basic helix-loop-helix (bHLH) DNA-binding superfamily protein                                                    | -2.19  | 8.24E-09 |
| At5g10695 | unknown protein                                                                                                  | 5.811  | 2.16E-11 |
| At5g10760 | Eukaryotic aspartyl protease family protein                                                                      | -2.616 | 0.0007   |
| At5g10800 | RNA recognition motif (RRM)-containing protein                                                                   | 1.436  | 7.83E-09 |
| At5g10830 | S-adenosyl-L-methionine-dependent methyltransferases superfamily protein                                         | 1.371  | 1.74E-08 |
| At5g10880 | tRNA synthetase-related / tRNA ligase-related                                                                    | 2.898  | 6.46E-12 |
| At5g10900 | Calcineurin-like metallo-phosphoesterase superfamily protein                                                     | 1.276  | 3.21E-07 |
| At5g11020 | Protein kinase superfamily protein                                                                               | 1.028  | 6.59E-06 |
| At5g11050 | AtMYB64 (myb domain protein 64); Member of R2R3-MYB transcription factor gene family.                            | 1.564  | 7.11E-10 |
| At5g11070 | unknown protein                                                                                                  | -1.464 | 1.20E-05 |
| At5g11100 | SYT4 (synaptotagmin 4)                                                                                           | 3.521  | 1.38E-10 |
| At5g11140 | Arabidopsis phospholipase-like protein (PEARLI 4) family                                                         | 4.452  | 1.89E-12 |
| At5g11150 | ATVAMP713 (vesicle-associated membrane protein 713); Member of Synaptobrevin-like AtVAMP7C, v-SNA                | -1.426 | 1.98E-07 |
| At5g11260 | HY5 (ELONGATED HYPOCOTYL 5); Basic leucine zipper (bZIP) transcription factor. Nuclear localization.             | 1.283  | 1.26E-06 |
| At5g11340 | Acyl-CoA N-acyltransferases (NAT) superfamily protein                                                            | 1.314  | 3.90E-07 |
| At5g11400 | Protein kinase superfamily protein                                                                               | 1.337  | 6.23E-08 |
| At5g11410 | Protein kinase superfamily protein                                                                               | 1.309  | 1.08E-06 |
| At5g11420 | Protein of unknown function, DUF642                                                                              | -1.211 | 0.0011   |
| At5g11610 | Exostosin family protein                                                                                         | -1.856 | 1.43E-08 |
| At5g11650 | alpha/beta-Hydrolases superfamily protein                                                                        | 2.351  | 1.70E-09 |
| At5g11680 | FUNCTIONS IN: molecular_function unknown; INVOLVED IN: biological_process unknown; LOCATED IN                    | 3.319  | 1.54E-11 |
| At5g11930 | Thioredoxin superfamily protein                                                                                  | 2.044  | 6.86E-08 |
| At5g11970 | Protein of unknown function (DUF3511)                                                                            | 1.17   | 6.68E-07 |
| At5g12000 | Protein kinase protein with adenine nucleotide alpha hydrolases-like domain                                      | 2.861  | 1.79E-08 |
| At5g12020 | HSP17.6II (17.6 kDa class II heat shock protein)                                                                 | 10.167 | 8.33E-12 |
| At5g12030 | AT-HSP17.6A (heat shock protein 17.6A); Encodes a cytosolic small heat shock protein with chaperone activi       | 9.592  | 1.80E-11 |
| At5g12040 | Nitrilase/cyanide hydratase and apolipoprotein N-acyltransferase family protein                                  | 1.961  | 3.11E-10 |
| At5g12050 | unknown protein                                                                                                  | -1.091 | 5.17E-05 |
| At5g12110 | Glutathione S-transferase, C-terminal-like                                                                       | 4.15   | 1.15E-11 |
| At5g12170 | CLT3 (CRT (chloroquine-resistance transporter)-like transporter 3); Encodes one of the CRT-Like transporters     | -1.077 | 5.56E-05 |
| At5g12250 | TUB6 (beta-6 tubulin); Encodes a beta-tubulin. Expression of TUB6 has been shown to decrease in response t       | -1.038 | 3.21E-05 |
| At5g12270 | 2-oxoglutarate (2OG) and Fe(II)-dependent oxygenase superfamily protein                                          | 2.46   | 5.25E-09 |
| At5g12280 | SWAP (Suppressor-of-White-APricot)/surp RNA-binding domain-containing protein                                    | 3.057  | 4.83E-11 |
| At5g12290 | DGS1 (DGD1 SUPPRESSOR 1); Encodes a mitochondrial outer membrane protein, involved in galactoglyceri             | 1.278  | 7.93E-06 |
| At5g12910 | Histone superfamily protein                                                                                      | -1.152 | 5.52E-05 |
| At5g12930 | unknown protein                                                                                                  | 2.088  | 1.63E-09 |

|           |                                                                                                                 |        |          |
|-----------|-----------------------------------------------------------------------------------------------------------------|--------|----------|
| At5g12950 | Putative glycosyl hydrolase of unknown function (DUF1680)                                                       | -1.43  | 9.55E-09 |
| At5g13100 | unknown protein                                                                                                 | 1.428  | 5.26E-09 |
| At5g13130 | Histidine kinase-, DNA gyrase B-, and HSP90-like ATPase family protein                                          | 1.333  | 3.86E-06 |
| At5g13170 | SAG29 (senescence-associated gene 29)                                                                           | 3.063  | 3.00E-07 |
| At5g13190 | CONTAINS InterPro DOMAIN/s: LPS-induced tumor necrosis factor alpha factor (InterPro:IPR006629); Has            | 3.288  | 5.49E-10 |
| At5g13200 | GRAM domain family protein                                                                                      | 3.809  | 1.95E-09 |
| At5g13210 | Uncharacterised conserved protein UCP015417, vWA                                                                | 1.899  | 4.86E-05 |
| At5g13220 | JAS1 (JASMONATE-ASSOCIATED 1); Plants overexpressing At5g13220.3, but not At5g13220.1 showed en                 | 2.5    | 4.71E-06 |
| At5g13330 | Rap2.6L (related to AP2 6l); encodes a member of the ERF (ethylene response factor) subfamily B-4 of ERF/A      | 2.592  | 3.39E-07 |
| At5g13370 | Auxin-responsive GH3 family protein                                                                             | 2.027  | 1.10E-09 |
| At5g13490 | AAC2 (ADP/ATP carrier 2); Encodes mitochondrial ADP/ATP carrier                                                 | 2.224  | 2.51E-07 |
| At5g13550 | SULTR4.1 (sulfate transporter 4.1); Encodes a sulfate transporter.                                              | 1.643  | 6.05E-09 |
| At5g13700 | ATPAO1 (polyamine oxidase 1); Encodes a protein with polyamine oxidase activity. The mRNA of this gene i        | 1.298  | 3.28E-06 |
| At5g13750 | ZIFL1 (zinc induced facilitator-like 1)                                                                         | 1.053  | 2.93E-06 |
| At5g14020 | Endosomal targeting BRO1-like domain-containing protein                                                         | 3.77   | 2.72E-11 |
| At5g14200 | ATIMD1 (ARABIDOPSIS ISOPROPYLMALATE DEHYDROGENASE 1); The AtIMD1 is one out of 3 gene                           | -1.962 | 2.60E-07 |
| At5g14250 | COP13 (CONSTITUTIVE PHOTOMORPHOGENIC 13); Encodes subunit 3 of the COP9 signalosome.                            | 1.039  | 4.85E-06 |
| At5g14310 | AtCXE16 (carboxyesterase 16)                                                                                    | 1.145  | 3.08E-07 |
| At5g14350 | Pentatricopeptide repeat (PPR) superfamily protein                                                              | -1.032 | 3.00E-05 |
| At5g14360 | Ubiquitin-like superfamily protein                                                                              | -1.492 | 8.64E-08 |
| At5g14550 | Core-2/I-branching beta-1,6-N-acetylglucosaminyltransferase family protein                                      | -1.077 | 2.22E-07 |
| At5g14602 | FUNCTIONS IN: molecular_function unknown; INVOLVED IN: biological_process unknown; LOCATED IN                   | 1.495  | 2.94E-07 |
| At5g14640 | ATSK13 (SHAGGY-LIKE KINASE 13)                                                                                  | 1.341  | 3.19E-07 |
| At5g14700 | NAD(P)-binding Rossmann-fold superfamily protein                                                                | 1.493  | 1.93E-05 |
| At5g14740 | BETA CA2 (BETA CARBONIC ANHYDRASE 2); Encodes a beta carbonic anhydrase likely to be localized i                | 1.676  | 2.37E-07 |
| At5g14760 | AO (L-aspartate oxidase); At5g14760 encodes for L-aspartate oxidase involved in the early steps of NAD bios     | 1.112  | 0.0009   |
| At5g14920 | Gibberellin-regulated family protein                                                                            | -1.863 | 1.88E-06 |
| At5g14940 | Major facilitator superfamily protein                                                                           | -1.958 | 1.86E-08 |
| At5g15090 | ATVDAC3 (ARABIDOPSIS THALIANA VOLTAGE DEPENDENT ANION CHANNEL 3); Encodes a volta                               | 1.23   | 6.90E-07 |
| At5g15230 | GASA4 (GAST1 protein homolog 4); gibberellin-regulated (GASA4)                                                  | -1.465 | 7.39E-07 |
| At5g15250 | FTSH6 (FTSH protease 6); Encodes an FtsH protease that is localized to the chloroplast. AtFtsH6 is involved i   | 7.79   | 2.06E-15 |
| At5g15254 | unknown protein                                                                                                 | 1.173  | 2.89E-07 |
| At5g15280 | Pentatricopeptide repeat (PPR) superfamily protein                                                              | -1.005 | 2.40E-06 |
| At5g15310 | ATMYB16 (myb domain protein 16); Member of the R2R3 factor gene family.                                         | -1.011 | 2.76E-05 |
| At5g15410 | ATCNGC2 (CYCLIC NUCLEOTIDE-GATED CHANNEL 2); 'defense, no death' gene (DND1) encodes a mut                      | -1.346 | 3.75E-07 |
| At5g15450 | APG6 (ALBINO AND PALE GREEN 6); Encodes a chloroplast-targeted Hsp101 homologue. Functions as a                 | 2.865  | 6.62E-11 |
| At5g15480 | C2H2-type zinc finger family protein                                                                            | 1.751  | 1.50E-09 |
| At5g15500 | Ankyrin repeat family protein                                                                                   | 1.121  | 0.00264  |
| At5g15600 | SP1L4 (SPIRAL1-like4); SPIRAL1-LIKE4 belongs to a six-member gene family in Arabidopsis; all members            | 1.972  | 2.91E-07 |
| At5g15725 | unknown protein                                                                                                 | 1.535  | 2.17E-05 |
| At5g15830 | AtbZIP3 (basic leucine-zipper 3)                                                                                | -1.575 | 4.80E-08 |
| At5g15840 | CO (CONSTANS); Encodes a protein showing similarities to zinc finger transcription factors, involved in regu    | -1.868 | 8.27E-08 |
| At5g15845 | other RNA; Potential natural antisense gene, locus overlaps with AT5G15850                                      | 1.575  | 1.32E-07 |
| At5g15850 | COL1 (CONSTANS-like 1); Homologous to the flowering-time gene CONSTANS.                                         | 1.637  | 9.71E-07 |
| At5g15860 | ATPCME (prenylcysteine methylesterase); Encodes a protein with prenylcysteine methylesterase activity.          | 1.519  | 5.75E-08 |
| At5g15870 | glycosyl hydrolase family 81 protein                                                                            | 1.37   | 3.64E-07 |
| At5g15940 | NAD(P)-binding Rossmann-fold superfamily protein                                                                | 1.956  | 2.36E-08 |
| At5g15970 | COR6.6 (COLD-RESPONSIVE 6.6); Encodes a gene that can be induced by cold and abscisic acid and may b            | -1.783 | 1.08E-06 |
| At5g16020 | GEX3 (gamete-expressed 3); Encodes GEX3, a plasma membrane localized protein expressed in the male gam          | 2.275  | 3.29E-08 |
| At5g16030 | unknown protein                                                                                                 | -1.07  | 5.00E-07 |
| At5g16080 | AtCXE17 (carboxyesterase 17)                                                                                    | 1.393  | 4.80E-05 |
| At5g16190 | ATCSLA11 (ARABIDOPSIS THALIANA CELLULOSE SYNTHASE LIKE A11); encodes a gene similar to                          | -1.086 | 3.79E-05 |
| At5g16200 | 50S ribosomal protein-related                                                                                   | 2.583  | 9.76E-12 |
| At5g16260 | ELF9 (EARLY FLOWERING 9); Encodes a RNA binding protein ELF9 (EARLY FLOWERING9). Loss of E                      | 1.2    | 1.73E-08 |
| At5g16530 | PIN5 (PIN-FORMED 5); Encodes PIN5, an atypical member of the PIN family. PIN5 is a functional auxin tra         | -1.668 | 3.64E-07 |
| At5g16570 | GLN1.4 (glutamine synthetase 1.4); Encodes a cytosolic glutamine synthetase, the enzyme has high affinity wi    | -1.071 | 0.0003   |
| At5g16830 | SYP21 (syntaxin of plants 21); member of SYP2 Gene Family. Over-expression of the gene in tobacco protop        | 1.386  | 1.03E-08 |
| At5g16900 | Leucine-rich repeat protein kinase family protein                                                               | 3.498  | 5.04E-10 |
| At5g16960 | Zinc-binding dehydrogenase family protein                                                                       | 2.733  | 4.28E-10 |
| At5g16970 | AER (alkenal reductase); encodes a 2-alkenal reductase (EC 1.3.1.74), plays a key role in the detoxification of | 2.008  | 5.13E-08 |
| At5g16980 | Zinc-binding dehydrogenase family protein                                                                       | 2.379  | 4.70E-08 |
| At5g17000 | Zinc-binding dehydrogenase family protein                                                                       | 2.334  | 3.24E-09 |
| At5g17050 | UGT78D2 (UDP-glucosyl transferase 78D2); The At5g17050 encodes a anthocyanidin 3-O-glucosyltransferas           | 1.208  | 0.00013  |
| At5g17170 | ENH1 (enhancer of sos3-1)                                                                                       | 1.138  | 7.37E-05 |
| At5g17270 | Protein prenyltransferase superfamily protein                                                                   | 1.274  | 2.68E-06 |
| At5g17300 | RVE1 (REVEILLE 1); Myb-like transcription factor that regulates hypocotyl growth by regulating free auxin l     | 3.606  | 3.99E-10 |
| At5g17310 | AtUGP2 (UDP-GLUCOSE PYROPHOSPHORYLASE 2)                                                                        | 2.115  | 4.32E-08 |

|           |                                                                                                                |        |          |
|-----------|----------------------------------------------------------------------------------------------------------------|--------|----------|
| At5g17340 | Putative membrane lipoprotein                                                                                  | -2.972 | 6.61E-05 |
| At5g17350 | unknown protein                                                                                                | 1.56   | 6.09E-05 |
| At5g17370 | Transducin/WD40 repeat-like superfamily protein                                                                | 1.503  | 2.21E-08 |
| At5g17380 | Thiamine pyrophosphate dependent pyruvate decarboxylase family protein                                         | 1.968  | 2.22E-07 |
| At5g17390 | Adenine nucleotide alpha hydrolases-like superfamily protein                                                   | 2.472  | 8.83E-07 |
| At5g17400 | ER-ANT1 (endoplasmic reticulum-adenine nucleotide transporter 1); This gene is predicted to encode an ER-l     | 1.704  | 5.56E-08 |
| At5g17410 | Spc97 / Spc98 family of spindle pole body (SBP) component                                                      | 1.453  | 1.35E-09 |
| At5g17460 | unknown protein                                                                                                | -1.053 | 0.0015   |
| At5g17680 | disease resistance protein (TIR-NBS-LRR class), putative                                                       | 1.022  | 2.84E-06 |
| At5g17780 | alpha/beta-Hydrolases superfamily protein                                                                      | 1.107  | 3.07E-06 |
| At5g18010 | SAUR-like auxin-responsive protein family                                                                      | -2.13  | 3.59E-08 |
| At5g18020 | SAUR-like auxin-responsive protein family                                                                      | -1.961 | 2.54E-07 |
| At5g18030 | SAUR-like auxin-responsive protein family                                                                      | -2.044 | 1.09E-07 |
| At5g18040 | unknown protein                                                                                                | 1.172  | 2.25E-05 |
| At5g18050 | SAUR-like auxin-responsive protein family                                                                      | -2.091 | 3.14E-08 |
| At5g18060 | SAUR-like auxin-responsive protein family                                                                      | -2.076 | 2.20E-08 |
| At5g18065 | unknown protein                                                                                                | 4.149  | 2.16E-11 |
| At5g18080 | SAUR-like auxin-responsive protein family                                                                      | -2.078 | 5.20E-08 |
| At5g18150 | Methyltransferase-related protein                                                                              | 1.244  | 2.85E-07 |
| At5g18180 | H/ACA ribonucleoprotein complex, subunit Gar1/Naf1 protein                                                     | 3.054  | 2.62E-11 |
| At5g18290 | SIP1B (SMALL AND BASIC INTRINSIC PROTEIN 1B); Belongs to a family of plant aquaporins.Similar to :             | 2.574  | 2.71E-09 |
| At5g18330 | ARM repeat superfamily protein                                                                                 | 1.138  | 0.00309  |
| At5g18340 | ARM repeat superfamily protein                                                                                 | 4.851  | 1.24E-12 |
| At5g18350 | Disease resistance protein (TIR-NBS-LRR class) family                                                          | 1.373  | 1.63E-05 |
| At5g18400 | Cytokine-induced anti-apoptosis inhibitor 1, Fe-S biogenesis                                                   | 2.361  | 4.31E-08 |
| At5g18420 | unknown protein                                                                                                | 1.479  | 1.89E-09 |
| At5g18430 | GDSL-like Lipase/Acylhydrolase superfamily protein                                                             | -1.193 | 0.00031  |
| At5g18460 | Protein of Unknown Function (DUF239)                                                                           | -1.123 | 3.50E-07 |
| At5g18480 | PGSIP6 (plant glycogenin-like starch initiation protein 6)                                                     | 1.262  | 1.04E-08 |
| At5g18490 | Plant protein of unknown function (DUF946)                                                                     | 2.766  | 1.10E-11 |
| At5g18600 | Thioredoxin superfamily protein                                                                                | -1.744 | 8.89E-07 |
| At5g18930 | BUD2 (BUSHY AND DWARF 2)                                                                                       | -1.23  | 7.08E-08 |
| At5g19000 | ATBPM1 (BTB-POZ AND MATH DOMAIN 1)                                                                             | 1.241  | 9.53E-09 |
| At5g19080 | RING/U-box superfamily protein                                                                                 | 1.314  | 0.0013   |
| At5g19190 | unknown protein                                                                                                | -1.855 | 4.23E-08 |
| At5g19240 | Glycoprotein membrane precursor GPI-anchored                                                                   | 1.188  | 0.0061   |
| At5g19470 | atnudt24 (nudix hydrolase homolog 24)                                                                          | 1.608  | 0.00025  |
| At5g19480 | unknown protein                                                                                                | 1.441  | 3.16E-08 |
| At5g19600 | SULTR3.5 (sulfate transporter 3.5); Encodes sulfate transporter Sultr3;5.                                      | -1.627 | 5.36E-08 |
| At5g19850 | alpha/beta-Hydrolases superfamily protein                                                                      | 1.658  | 3.70E-09 |
| At5g19855 | Chaperonin-like RbcX protein                                                                                   | 1.556  | 8.63E-09 |
| At5g19875 | unknown protein                                                                                                | 4.231  | 4.45E-12 |
| At5g19970 | unknown protein                                                                                                | -1.11  | 3.46E-06 |
| At5g20000 | AAA-type ATPase family protein                                                                                 | 1.712  | 4.52E-08 |
| At5g20030 | Plant Tudor-like RNA-binding protein                                                                           | -1.159 | 1.18E-06 |
| At5g20110 | Dynein light chain type 1 family protein                                                                       | -1.343 | 1.78E-06 |
| At5g20150 | ATSPX1 (ARABIDOPSIS THALIANA SPX DOMAIN GENE 1)                                                                | -1.095 | 0.0004   |
| At5g20225 | other RNA; Potential natural antisense gene, locus overlaps with AT5G20220                                     | 2.513  | 5.69E-09 |
| At5g20370 | serine-rich protein-related                                                                                    | 2.219  | 7.17E-07 |
| At5g20380 | PHT4.5 (phosphate transporter 4.5); Encodes an inorganic phosphate transporter (PHT4;5).                       | 1.401  | 5.36E-06 |
| At5g20410 | ATMGD2 (ARABIDOPSIS THALIANA MONOGALACTOSYLDIACYLGLYCEROL SYNTHASE 2); Enco                                    | -1.115 | 0.00339  |
| At5g20630 | ATGER3 (ARABIDOPSIS THALIANA GERMIN 3); Encodes a germin-like protein. Its transcripts are more a              | -1.203 | 0.0002   |
| At5g20640 | Protein of unknown function (DUF567)                                                                           | -1.002 | 0.00012  |
| At5g20700 | Protein of unknown function (DUF581)                                                                           | -1.203 | 0.0001   |
| At5g20790 | unknown protein                                                                                                | -2.408 | 3.37E-05 |
| At5g20820 | SAUR-like auxin-responsive protein family                                                                      | -1.387 | 6.75E-06 |
| At5g20910 | AIP2 (ABI3-interacting protein 2)                                                                              | 1.957  | 3.53E-09 |
| At5g20935 | unknown protein                                                                                                | -1.093 | 5.13E-05 |
| At5g21105 | Plant L-ascorbate oxidase                                                                                      | -1.175 | 4.52E-07 |
| At5g21430 | Chaperone DnaJ-domain superfamily protein                                                                      | 1.061  | 0.0003   |
| At5g21900 | RNI-like superfamily protein                                                                                   | 2.17   | 3.84E-09 |
| At5g21940 | unknown protein                                                                                                | -1.04  | 4.94E-05 |
| At5g22000 | RHF2A (RING-H2 group F2A); encodes a RING-type E3 ubiquitin ligase implicated in gametogenesis. Doubl          | 1.494  | 2.57E-07 |
| At5g22060 | ATJ2 (ARABIDOPSIS THALIANA DNAJ HOMOLOGUE 2); Co-chaperonin similar to E. coli DnaJ                            | 2.789  | 3.49E-10 |
| At5g22090 | Protein of unknown function (DUF3049)                                                                          | -1.28  | 7.47E-06 |
| At5g22140 | FAD/NAD(P)-binding oxidoreductase family protein                                                               | 2.054  | 2.21E-09 |
| At5g22220 | E2F1 (E2F transcription factor 1); Member of the E2F transcription factors, (cell cycle genes), key components | 1.125  | 5.34E-08 |

|           |                                                                                                                   |        |          |
|-----------|-------------------------------------------------------------------------------------------------------------------|--------|----------|
| At5g22310 | unknown protein                                                                                                   | -1.67  | 3.26E-07 |
| At5g22410 | RHS18 (root hair specific 18)                                                                                     | 1.759  | 4.75E-06 |
| At5g22520 | unknown protein                                                                                                   | 1.213  | 0.002    |
| At5g22530 | unknown protein                                                                                                   | 3.317  | 5.42E-07 |
| At5g22540 | Plant protein of unknown function (DUF247)                                                                        | 2.666  | 7.68E-06 |
| At5g22570 | ATWRKY38 (ARABIDOPSIS THALIANA WRKY DNA-BINDING PROTEIN 38); member of WRKY Tran:                                 | -1.808 | 0.0042   |
| At5g22580 | Stress responsive A/B Barrel Domain                                                                               | -1.382 | 6.61E-07 |
| At5g22660 | FBD, F-box, Skp2-like and Leucine Rich Repeat domains containing protein                                          | 3.473  | 1.77E-10 |
| At5g22670 | F-box/RNI-like/FBD-like domains-containing protein                                                                | 5.223  | 1.31E-14 |
| At5g22680 | FUNCTIONS IN: molecular_function unknown; INVOLVED IN: biological_process unknown; LOCATED IN                     | 3.617  | 2.38E-06 |
| At5g22690 | Disease resistance protein (TIR-NBS-LRR class) family                                                             | 3.396  | 5.91E-12 |
| At5g22720 | F-box/RNI-like superfamily protein                                                                                | 1.128  | 4.07E-07 |
| At5g22860 | Serine carboxypeptidase S28 family protein                                                                        | -1.239 | 3.12E-06 |
| At5g22880 | H2B (HISTONE H2B); Encodes a histone 2B (H2B) protein. This protein can be ubiquitinated in planta, and t         | -1.182 | 0.00013  |
| At5g22920 | CHY-type/CTCHY-type/RING-type Zinc finger protein                                                                 | -1.999 | 3.81E-08 |
| At5g22930 | Protein of unknown function (DUF1635)                                                                             | -1.351 | 3.28E-06 |
| At5g23010 | IMS3 (2-ISOPROPYLMALATE SYNTHASE 3); Encodes a methylthioalkylmalate synthase, catalyzes the con                  | -2.61  | 1.03E-10 |
| At5g23020 | IMS2 (2-isopropylmalate synthase 2); methylthioalkylmalate synthase-like. Also known as 2-isopropylmalate sy      | -1.994 | 1.65E-07 |
| At5g23210 | SCPL34 (serine carboxypeptidase-like 34)                                                                          | -2.111 | 2.00E-07 |
| At5g23240 | DNAJ heat shock N-terminal domain-containing protein                                                              | -3.603 | 1.77E-09 |
| At5g23350 | GRAM domain-containing protein / ABA-responsive protein-related                                                   | -1.009 | 7.72E-05 |
| At5g23360 | GRAM domain-containing protein / ABA-responsive protein-related                                                   | -1.202 | 7.77E-06 |
| At5g23420 | HMGB6 (high-mobility group box 6); Encodes HMGB6, a protein belonging to the subgroup of HMGB (high               | -1.001 | 6.14E-05 |
| At5g23425 | NA                                                                                                                | -1.233 | 0.00425  |
| At5g23460 | unknown protein                                                                                                   | -1.49  | 8.03E-09 |
| At5g23480 | SWIB/MDM2 domain                                                                                                  | 2.387  | 4.75E-09 |
| At5g23510 | unknown protein                                                                                                   | 1.713  | 1.59E-07 |
| At5g23600 | RNA 2'-phosphotransferase, Tpt1 / KptA family                                                                     | 1.396  | 6.83E-09 |
| At5g23660 | MTN3 (homolog of Medicago truncatula MTN3); homolog of the Medicago nodulin MTN3                                  | -2.159 | 1.62E-06 |
| At5g23710 | DNA binding                                                                                                       | 1.099  | 2.72E-06 |
| At5g23870 | Pectinacetyltransferase family protein                                                                            | -1.938 | 9.80E-09 |
| At5g23980 | FRO4 (ferric reduction oxidase 4); Encodes a ferric chelate reductase that is expressed at low levels in roots,sh | -2.744 | 5.54E-09 |
| At5g24070 | Peroxidase superfamily protein                                                                                    | 1.131  | 8.68E-06 |
| At5g24110 | ATWRKY30 (ARABIDOPSIS THALIANA WRKY DNA-BINDING PROTEIN 30); member of WRKY Tran:                                 | 5.431  | 4.19E-11 |
| At5g24120 | ATSIG5 (SIGMA FACTOR 5); Encodes a specialized sigma factor that functions in regulation of plastid gene:         | 2.609  | 8.70E-09 |
| At5g24200 | alpha/beta-Hydrolases superfamily protein                                                                         | -3.128 | 0.00024  |
| At5g24390 | Ypt/Rab-GAP domain of gyp1p superfamily protein                                                                   | 1.37   | 9.26E-07 |
| At5g24470 | APRR5 (pseudo-response regulator 5); Encodes a pseudo-response regulator whose mutation affects various ci        | -1.186 | 0.00044  |
| At5g24490 | 30S ribosomal protein, putative                                                                                   | -1.201 | 6.68E-07 |
| At5g24530 | DMR6 (DOWNY MILDEW RESISTANT 6); Encodes a putative 2OG-Fe(II) oxygenase that is defense-associ:                  | -1.035 | 0.0184   |
| At5g24570 | unknown protein                                                                                                   | -1.152 | 1.26E-06 |
| At5g24580 | Heavy metal transport/detoxification superfamily protein                                                          | -1.323 | 8.27E-07 |
| At5g24590 | ANAC091 (Arabidopsis NAC domain containing protein 91); Member of NAC protein family. Interacts with t            | 1.022  | 3.67E-05 |
| At5g24640 | unknown protein                                                                                                   | 2.345  | 6.51E-07 |
| At5g24655 | LSU4 (RESPONSE TO LOW SULFUR 4)                                                                                   | 2.386  | 5.69E-07 |
| At5g24660 | LSU2 (RESPONSE TO LOW SULFUR 2)                                                                                   | 2.739  | 3.71E-09 |
| At5g24740 | INVOLVED IN: protein localization (Protein of unknown function (DUF1162))                                         | 1.84   | 1.06E-07 |
| At5g24810 | ABC1 family protein                                                                                               | 1.216  | 1.49E-07 |
| At5g24830 | Tetratricopeptide repeat (TPR)-like superfamily protein                                                           | -1.017 | 4.47E-07 |
| At5g24910 | CYP714A1 (cytochrome P450, family 714, subfamily A, polypeptide 1); member of CYP714A                             | -1.881 | 1.74E-05 |
| At5g24920 | AtGDU5 (glutamine dumper 5); Encodes a member of the GDU (glutamine dumper) family proteins involved              | -1.788 | 5.29E-08 |
| At5g25050 | Major facilitator superfamily protein                                                                             | 1.04   | 5.02E-07 |
| At5g25060 | RNA recognition motif (RRM)-containing protein                                                                    | 1.225  | 1.87E-07 |
| At5g25110 | CIPK25 (CBL-interacting protein kinase 25); member of AtCIPKs                                                     | -1.451 | 5.14E-07 |
| At5g25120 | CYP71B11 (ytochrome p450, family 71, subfamily B, polypeptide 11); putative cytochrome P450                       | -1.098 | 0.0002   |
| At5g25140 | CYP71B13 (cytochrome P450, family 71, subfamily B, polypeptide 13); putative cytochrome P450                      | 1.052  | 1.61E-05 |
| At5g25190 | Integrase-type DNA-binding superfamily protein; encodes a member of the ERF (ethylene response factor) sub        | -1.081 | 7.30E-05 |
| At5g25210 | unknown protein                                                                                                   | -1.758 | 2.55E-08 |
| At5g25250 | SPFH/Band 7/PHB domain-containing membrane-associated protein family                                              | 2.359  | 0.0007   |
| At5g25440 | Protein kinase superfamily protein                                                                                | 2.301  | 7.76E-07 |
| At5g25450 | Cytochrome bd ubiquinol oxidase, 14kDa subunit                                                                    | 6.299  | 4.58E-06 |
| At5g25460 | Protein of unknown function, DUF642                                                                               | -1.889 | 1.43E-07 |
| At5g25520 | SPOC domain / Transcription elongation factor S-II protein                                                        | 1.599  | 5.23E-08 |
| At5g25530 | DNAJ heat shock family protein                                                                                    | 3.986  | 1.44E-10 |
| At5g25580 | BEST Arabidopsis thaliana protein match is: DDT domain superfamily (TAIR:AT1G18950.1)                             | 1.112  | 3.62E-06 |
| At5g25840 | Protein of unknown function (DUF1677)                                                                             | -1.391 | 1.75E-05 |
| At5g25920 | BEST Arabidopsis thaliana protein match is: Eukaryotic aspartyl protease family protein (TAIR:AT3G29750.1         | 2.129  | 4.24E-06 |

|           |                                                                                                                 |        |          |
|-----------|-----------------------------------------------------------------------------------------------------------------|--------|----------|
| At5g25930 | Protein kinase family protein with leucine-rich repeat domain                                                   | 3.177  | 6.47E-10 |
| At5g25970 | Core-2/I-branching beta-1,6-N-acetylglucosaminyltransferase family protein                                      | -1.181 | 2.54E-05 |
| At5g26030 | FC1 (ferrochelatase 1); encodes ferrochelatase I located in plastids. Involved in heme biosynthesis in non-phot | 1.361  | 2.06E-06 |
| At5g26220 | ChaC-like family protein                                                                                        | 5.05   | 1.75E-11 |
| At5g26230 | unknown protein                                                                                                 | -1.253 | 2.84E-07 |
| At5g26570 | PWD (PHOSPHOGLUCAN WATER DIKINASE); chloroplastic phosphoglucan, water dikinase (PWD) whi                       | -1.207 | 9.74E-07 |
| At5g26920 | CBP60G (Cam-binding protein 60-like G); Encodes a calmodulin-binding protein CBP60g (calmodulin bindin          | 1.312  | 0.00068  |
| At5g27220 | Frigida-like protein                                                                                            | -1.555 | 2.32E-07 |
| At5g27250 | transposase IS4 family protein, contains Pfam profile: PF01609 transposase DDE domain (transposable eleme       | -1.147 | 6.64E-07 |
| At5g27350 | SFP1 (Major facilitator superfamily protein); Encodes a sugar-porter family protein that is induced during leaf | 1.231  | 1.66E-06 |
| At5g27420 | CNI1 (carbon/nitrogen insensitive 1); Encodes CNI1 (Carbon/Nitrogen Insensitive1) (also named as ATL31), :      | 2.882  | 2.73E-08 |
| At5g27460 | Tetratricopeptide repeat (TPR)-like superfamily protein                                                         | 1.062  | 1.86E-07 |
| At5g27520 | PNC2 (peroxisomal adenine nucleotide carrier 2); encodes a peroxisomal adenine nucleotide transporter, invol    | 1.044  | 3.92E-06 |
| At5g27580 | AGL89 (AGAMOUS-like 89)                                                                                         | 1.675  | 2.83E-05 |
| At5g27660 | Trypsin family protein with PDZ domain                                                                          | 4.233  | 2.86E-12 |
| At5g27760 | Hypoxia-responsive family protein                                                                               | 2.579  | 8.80E-11 |
| At5g27780 | SAUR-like auxin-responsive protein family                                                                       | -1.275 | 3.04E-07 |
| At5g27950 | P-loop containing nucleoside triphosphate hydrolases superfamily protein                                        | -1.262 | 4.89E-08 |
| At5g27980 | Seed maturation protein                                                                                         | 1.659  | 2.29E-08 |
| At5g28176 | pseudogene, hypothetical protein (transposable element gene)                                                    | 1.818  | 6.48E-09 |
| At5g28540 | BIP1 (heat shock protein 70 (Hsp 70) family protein); Encodes the luminal binding protein BiP, an ER-localize   | 1.242  | 1.20E-05 |
| At5g28630 | glycine-rich protein                                                                                            | 1.156  | 0.00068  |
| At5g28913 | SADHU4-1 (sadhu non-coding retrotransposon 4-1); Member of Sadhu non-coding retrotransposon family              | -1.226 | 1.80E-07 |
| At5g32072 | pseudogene of Glucose-6-phosphate isomerase; pseudogene of Glucose-6-phosphate isomerase                        | 2.201  | 3.18E-07 |
| At5g33250 | pseudogene, hypothetical protein, predicted proteins - Arabidopsis thaliana (transposable element gene)         | 1.376  | 2.50E-09 |
| At5g33370 | GDSL-like Lipase/Acylhydrolase superfamily protein                                                              | -1.105 | 0.0158   |
| At5g35200 | ENTH/ANTH/VHS superfamily protein                                                                               | 1.121  | 7.27E-07 |
| At5g35320 | unknown protein                                                                                                 | 3.996  | 6.56E-13 |
| At5g35460 | unknown protein                                                                                                 | 2.722  | 8.79E-11 |
| At5g35480 | unknown protein                                                                                                 | -2.437 | 2.22E-06 |
| At5g35490 | ATMRU1 (ARABIDOPSIS MTO 1 RESPONDING UP 1); Encodes MRU1 (mto 1 responding up). Up-regula                       | -2.346 | 1.71E-06 |
| At5g35688 | unknown protein                                                                                                 | 2.018  | 3.44E-09 |
| At5g35735 | Auxin-responsive family protein                                                                                 | 2.282  | 9.22E-07 |
| At5g35960 | Protein kinase family protein                                                                                   | 2.486  | 1.95E-09 |
| At5g36120 | CCB3 (cofactor assembly, complex C (B6F))                                                                       | -1.058 | 7.56E-06 |
| At5g36290 | Uncharacterized protein family (UPF0016)                                                                        | 1.19   | 5.33E-05 |
| At5g36910 | THI2.2 (thionin 2.2); Encodes a thionin that is expressed at a low basal level in seedlings and shows circadian | 1.378  | 0.00025  |
| At5g36920 | unknown protein                                                                                                 | 1.543  | 5.92E-08 |
| At5g36925 | unknown protein                                                                                                 | 1.496  | 0.0018   |
| At5g37175 | similar to nucleic acid binding / ribonuclease H [Arabidopsis thaliana] (TAIR:AT2G15750.1); similar to 80C0     | -1.134 | 0.00264  |
| At5g37240 | unknown protein                                                                                                 | 1.124  | 0.00011  |
| At5g37260 | CIR1 (CIRCADIAN 1); Encodes a MYB family transcription factor Circadian 1 (CIR1). Involved in circadian         | 2.448  | 1.03E-07 |
| At5g37340 | ZPR1 zinc-finger domain protein                                                                                 | 4.53   | 1.52E-13 |
| At5g37350 | Serine/threonine-protein kinase Rio1                                                                            | 1.327  | 4.39E-09 |
| At5g37380 | Chaperone DnaJ-domain superfamily protein                                                                       | 1.278  | 2.06E-07 |
| At5g37400 | Family of unknown function (DUF577)                                                                             | 1.889  | 2.10E-08 |
| At5g37440 | Chaperone DnaJ-domain superfamily protein                                                                       | 1.909  | 1.97E-09 |
| At5g37500 | GORK (gated outwardly-rectifying K+ channel); Encodes a guard cell outward potassium channel. Belongs to        | 1.578  | 7.01E-08 |
| At5g37550 | unknown protein                                                                                                 | 2.594  | 1.34E-09 |
| At5g37670 | HSP20-like chaperones superfamily protein                                                                       | 6.677  | 2.60E-12 |
| At5g37680 | ARLA1A (ADP-ribosylation factor-like A1A); A member of ARF-like GTPase family. A thaliana has 21 meml           | 1.707  | 3.29E-10 |
| At5g37710 | alpha/beta-Hydrolases superfamily protein                                                                       | 1.695  | 2.93E-09 |
| At5g37750 | Chaperone DnaJ-domain superfamily protein                                                                       | 1.493  | 3.26E-07 |
| At5g37940 | Zinc-binding dehydrogenase family protein                                                                       | 1.112  | 0.00019  |
| At5g37950 | UDP-Glycosyltransferase superfamily protein                                                                     | -1.347 | 0.00023  |
| At5g37960 | GroES-like family protein                                                                                       | 1.685  | 6.63E-08 |
| At5g38010 | UDP-Glycosyltransferase superfamily protein                                                                     | -1.036 | 3.48E-05 |
| At5g38710 | Methylenetetrahydrofolate reductase family protein                                                              | -1.25  | 9.71E-06 |
| At5g38750 | asparaginyl-tRNA synthetase family                                                                              | 1.046  | 1.60E-05 |
| At5g38895 | RING/U-box superfamily protein                                                                                  | 2.796  | 3.19E-12 |
| At5g38900 | Thioredoxin superfamily protein                                                                                 | 1.795  | 0.0016   |
| At5g38930 | RmlC-like cupins superfamily protein                                                                            | -1.183 | 0.00142  |
| At5g38940 | RmlC-like cupins superfamily protein                                                                            | -1.292 | 0.00027  |
| At5g38970 | BR6OX (BRASSINOSTEROID-6-OXIDASE); Encodes a polypeptide involved in the C-6 oxidation of brassir               | -1.3   | 1.89E-06 |
| At5g39020 | Malectin/receptor-like protein kinase family protein                                                            | 1.752  | 3.29E-08 |
| At5g39080 | HXXXD-type acyl-transferase family protein                                                                      | -1.012 | 3.63E-06 |
| At5g39090 | HXXXD-type acyl-transferase family protein                                                                      | 1.238  | 1.91E-07 |



|           |                                                                                                                |        |          |
|-----------|----------------------------------------------------------------------------------------------------------------|--------|----------|
| At5g39130 | RmlC-like cupins superfamily protein                                                                           | -2.142 | 1.24E-07 |
| At5g39160 | RmlC-like cupins superfamily protein                                                                           | -1.792 | 6.57E-07 |
| At5g39190 | ATGER2 (A. THALIANA GERMIN LIKE PROTEIN 2); germin-like protein (GLP2a)                                        | -2.063 | 2.22E-07 |
| At5g39520 | Protein of unknown function (DUF1997)                                                                          | -2.045 | 1.29E-05 |
| At5g39610 | ANAC092 (Arabidopsis NAC domain containing protein 92); Encodes a NAC-domain transcription factor. Po          | -2.294 | 1.63E-07 |
| At5g39650 | Protein of unknown function (DUF679)                                                                           | 3.028  | 1.77E-09 |
| At5g39660 | CDF2 (cyclin DOF factor 2); Dof-type zinc finger domain-containing protein, identical to H-protein promoter    | 2.868  | 5.59E-11 |
| At5g39760 | AtHB23 (homeobox protein 23)                                                                                   | -1.361 | 6.99E-07 |
| At5g39785 | Protein of unknown function (DUF1666)                                                                          | 2.142  | 3.15E-08 |
| At5g39860 | BHLH136 (BASIC HELIX-LOOP-HELIX PROTEIN 136); Encodes PRE1 (PACLOBUTRAZOL RESISTAN                             | -1.844 | 2.84E-07 |
| At5g39865 | Glutaredoxin family protein                                                                                    | -1.042 | 2.33E-06 |
| At5g40010 | AATP1 (AAA-ATPase 1)                                                                                           | -1.49  | 0.04435  |
| At5g40150 | Peroxidase superfamily protein                                                                                 | -1.102 | 4.64E-07 |
| At5g40240 | nodulin MtN21 /EamA-like transporter family protein                                                            | -1.555 | 1.09E-06 |
| At5g40382 | Cytochrome c oxidase subunit Vc family protein                                                                 | 1.323  | 6.50E-08 |
| At5g40395 | gi 2351067 dbj AB006702.1  Arabidopsis thaliana U6acat At5g40400 gi 2351067 dbj AB006702.1                     | 1.033  | 0.00743  |
| At5g40450 | unknown protein                                                                                                | -1.749 | 1.87E-06 |
| At5g40630 | Ubiquitin-like superfamily protein                                                                             | -2.263 | 3.05E-09 |
| At5g40645 | RPM1-interacting protein 4 (RIN4) family protein                                                               | 2.057  | 1.31E-06 |
| At5g40670 | PQ-loop repeat family protein / transmembrane family protein                                                   | 1.403  | 2.05E-08 |
| At5g40680 | Galactose oxidase/kelch repeat superfamily protein                                                             | 2.091  | 3.29E-10 |
| At5g40720 | Domain of unknown function (DUF23)                                                                             | -1.098 | 6.07E-06 |
| At5g40760 | G6PD6 (glucose-6-phosphate dehydrogenase 6); Encodes a cytosolic glucose-6-phosphate dehydrogenase that        | 1.388  | 3.42E-08 |
| At5g40770 | ATPHB3 (prohibitin 3); prohibitin 3                                                                            | 1.293  | 3.64E-05 |
| At5g40880 | WD-40 repeat family protein / zfw3 protein (ZFWD3)                                                             | 2.237  | 1.95E-08 |
| At5g40942 | RNR2B (ribonucleotide reductase 2B); pseudogene of ribonucleoside-diphosphate reductase small chain/ ribor     | -1.45  | 2.09E-06 |
| At5g41050 | Pollen Ole e 1 allergen and extensin family protein                                                            | -1.154 | 1.77E-05 |
| At5g41070 | DRB5 (dsRNA-binding protein 5); Encodes a double-stranded RNA binding protein.                                 | 1.276  | 1.44E-08 |
| At5g41080 | PLC-like phosphodiesterases superfamily protein                                                                | -1.022 | 0.0023   |
| At5g41140 | Myosin heavy chain-related protein                                                                             | -1.284 | 2.64E-07 |
| At5g41320 | unknown protein                                                                                                | 3.947  | 5.09E-11 |
| At5g41360 | ATXPB2 (ARABIDOPSIS HOMOLOG OF XERODERMA PIGMENTOSUM COMPLEMENTATION GRO                                       | 1.46   | 5.71E-07 |
| At5g41390 | PLAC8 family protein                                                                                           | 1.672  | 4.87E-09 |
| At5g41410 | BEL1 (BELL 1); Homeodomain protein required for ovule identity.Loss of function mutations show homeotic        | -1.305 | 9.81E-07 |
| At5g41550 | Disease resistance protein (TIR-NBS-LRR class) family                                                          | 1.284  | 4.10E-06 |
| At5g41560 | FUNCTIONS IN: molecular_function unknown; INVOLVED IN: biological_process unknown; LOCATED IN                  | 1.27   | 4.33E-07 |
| At5g41610 | ATCHX18 (ARABIDOPSIS THALIANA CATION/H+ EXCHANGER 18); member of Putative Na+/H+ antiq                         | 2.827  | 4.66E-08 |
| At5g41620 | FUNCTIONS IN: molecular_function unknown; INVOLVED IN: biological_process unknown; LOCATED IN                  | 1.815  | 6.23E-11 |
| At5g41740 | Disease resistance protein (TIR-NBS-LRR class) family                                                          | 1.052  | 0.0032   |
| At5g41750 | Disease resistance protein (TIR-NBS-LRR class) family                                                          | 2.48   | 8.05E-05 |
| At5g41761 | unknown protein                                                                                                | 1.365  | 1.49E-05 |
| At5g41900 | alpha/beta-Hydrolases superfamily protein                                                                      | -1.546 | 1.11E-07 |
| At5g41990 | WNK8 (with no lysine (K) kinase 8); Encodes a member of the WNK family (9 members in all) of protein kin       | 2.099  | 3.91E-11 |
| At5g42000 | ORMDL family protein                                                                                           | 1.081  | 3.91E-07 |
| At5g42010 | Transducin/WD40 repeat-like superfamily protein                                                                | 2.152  | 4.63E-09 |
| At5g42020 | BIP (luminal binding protein); Luminal binding protein (BiP2) involved in polar nuclei fusion during prolifera | 1.329  | 6.35E-07 |
| At5g42050 | DCD (Development and Cell Death) domain protein                                                                | 1.365  | 6.14E-06 |
| At5g42120 | Concanavalin A-like lectin protein kinase family protein                                                       | 1.271  | 3.97E-08 |
| At5g42150 | Glutathione S-transferase family protein                                                                       | 2.146  | 1.59E-08 |
| At5g42170 | SGNH hydrolase-type esterase superfamily protein                                                               | 4.254  | 3.62E-11 |
| At5g42180 | Peroxidase superfamily protein                                                                                 | 3.802  | 2.79E-08 |
| At5g42220 | Ubiquitin-like superfamily protein                                                                             | 1.601  | 2.39E-09 |
| At5g42230 | scpl41 (serine carboxypeptidase-like 41)                                                                       | 1.999  | 1.39E-08 |
| At5g42380 | CML37 (calmodulin like 37)                                                                                     | 6.026  | 2.04E-07 |
| At5g42720 | Glycosyl hydrolase family 17 protein                                                                           | 1.153  | 1.70E-06 |
| At5g42750 | BKII (BRII kinase inhibitor 1); Encodes a plasma-membrane associated phosphoprotein that interacts directly    | -1.234 | 2.00E-06 |
| At5g42760 | Leucine carboxyl methyltransferase                                                                             | 3.504  | 1.19E-09 |
| At5g42785 | unknown protein                                                                                                | 1.129  | 0.01483  |
| At5g42825 | unknown protein                                                                                                | -1.272 | 1.49E-06 |
| At5g42830 | HXXXD-type acyl-transferase family protein                                                                     | 1.299  | 6.90E-05 |
| At5g42900 | COR27 (cold regulated gene 27)                                                                                 | -2.352 | 3.66E-10 |
| At5g42965 | Polynucleotidyl transferase, ribonuclease H-like superfamily protein                                           | 1.775  | 7.50E-05 |
| At5g43040 | Cysteine/Histidine-rich C1 domain family protein                                                               | -1.015 | 2.63E-06 |
| At5g43170 | AZF3 (zinc-finger protein 3); Encodes zinc finger protein. mRNA levels are elevated in response to high salin  | 1.74   | 1.19E-07 |
| At5g43290 | ATWRKY49 (ARABIDOPSIS THALIANA WRKY DNA-BINDING PROTEIN 49); member of WRKY Tran                               | -1.444 | 2.81E-05 |
| At5g43300 | PLC-like phosphodiesterases superfamily protein                                                                | 1.208  | 8.57E-05 |
| At5g43330 | Lactate/malate dehydrogenase family protein                                                                    | 1.163  | 1.94E-06 |

|           |                                                                                                              |        |          |
|-----------|--------------------------------------------------------------------------------------------------------------|--------|----------|
| At5g43350 | ATPT1 (ARABIDOPSIS THALIANA PHOSPHATE TRANSPORTER 1); Encodes an inorganic phosphate tr                      | -1.944 | 1.18E-05 |
| At5g43370 | APT1 (ARABIDOPSIS PHOSPHATE TRANSPORTER 1); Encodes a phosphate transporter Pht1;2. Member                   | -1.496 | 2.19E-05 |
| At5g43401 | Defensin-like (DEFL) family protein; Encodes a defensin-like (DEFL) family protein.                          | 4.081  | 1.02E-10 |
| At5g43403 | other RNA; Unknown gene                                                                                      | 1.029  | 1.29E-07 |
| At5g43420 | RING/U-box superfamily protein                                                                               | 2.548  | 6.87E-08 |
| At5g43440 | 2-oxoglutarate (2OG) and Fe(II)-dependent oxygenase superfamily protein; encodes a protein whose sequence    | -1.689 | 6.62E-07 |
| At5g43450 | 2-oxoglutarate (2OG) and Fe(II)-dependent oxygenase superfamily protein; encodes a protein whose sequence    | 1.614  | 0.0002   |
| At5g43490 | unknown protein                                                                                              | 1.44   | 5.13E-08 |
| At5g43620 | Pre-mRNA cleavage complex II                                                                                 | 1.903  | 1.54E-07 |
| At5g43700 | ATAUX2-11 (AUXIN INDUCIBLE 2-11); Auxin inducible protein similar to transcription factors.                  | -1.622 | 4.00E-06 |
| At5g43950 | Plant protein of unknown function (DUF946)                                                                   | 1.621  | 9.92E-10 |
| At5g44005 | unknown protein                                                                                              | -2.039 | 2.07E-06 |
| At5g44020 | HAD superfamily, subfamily IIIB acid phosphatase                                                             | -1.421 | 0.0002   |
| At5g44060 | unknown protein                                                                                              | 2.025  | 2.99E-07 |
| At5g44070 | ATPCS1 (ARABIDOPSIS THALIANA PHYTOCHELATIN SYNTHASE 1); Phytochelatin synthase gene cor                      | 2.901  | 1.18E-09 |
| At5g44080 | Basic-leucine zipper (bZIP) transcription factor family protein                                              | 1.29   | 5.48E-08 |
| At5g44090 | Calcium-binding EF-hand family protein                                                                       | 1.33   | 2.26E-07 |
| At5g44130 | FLA13 (FASCICLIN-like arabinogalactan protein 13 precursor)                                                  | -1.571 | 6.57E-07 |
| At5g44210 | ATERF-9 (ERF DOMAIN PROTEIN- 9); encodes a member of the ERF (ethylene response factor) subfamily 1          | -1.74  | 2.76E-07 |
| At5g44260 | Zinc finger C-x8-C-x5-C-x3-H type family protein                                                             | -2.085 | 5.47E-09 |
| At5g44360 | FAD-binding Berberine family protein                                                                         | 1.517  | 1.28E-07 |
| At5g44380 | FAD-binding Berberine family protein                                                                         | -1.553 | 7.10E-05 |
| At5g44390 | FAD-binding Berberine family protein                                                                         | -1.12  | 0.00077  |
| At5g44400 | FAD-binding Berberine family protein                                                                         | -1.035 | 1.98E-05 |
| At5g44410 | FAD-binding Berberine family protein                                                                         | -1.363 | 5.53E-08 |
| At5g44440 | FAD-binding Berberine family protein                                                                         | -1.348 | 0.00192  |
| At5g44530 | Subtilase family protein                                                                                     | -1.389 | 1.03E-06 |
| At5g44562 | other RNA; Potential natural antisense gene, locus overlaps with AT5G44560                                   | -1.791 | 0.0001   |
| At5g44574 | unknown protein                                                                                              | -1.029 | 8.40E-05 |
| At5g44578 | unknown protein                                                                                              | -1.225 | 8.69E-05 |
| At5g44620 | CYP706A3 (cytochrome P450, family 706, subfamily A, polypeptide 3); member of CYP706A                        | 1.159  | 2.97E-05 |
| At5g44680 | DNA glycosylase superfamily protein                                                                          | -1.739 | 1.31E-06 |
| At5g44870 | Disease resistance protein (TIR-NBS-LRR class) family                                                        | 1.236  | 5.16E-07 |
| At5g44990 | Glutathione S-transferase family protein                                                                     | 3.143  | 4.67E-07 |
| At5g45130 | ATRA-B-F2A (ARABIDOPSIS RAB HOMOLOG F2A); small GTP binding protein                                          | 1.621  | 1.44E-10 |
| At5g45160 | Root hair defective 3 GTP-binding protein (RHD3)                                                             | 1.434  | 4.25E-06 |
| At5g45180 | Flavin-binding monooxygenase family protein                                                                  | 1.67   | 3.50E-09 |
| At5g45410 | unknown protein                                                                                              | 1.148  | 2.68E-07 |
| At5g45430 | Protein kinase superfamily protein                                                                           | 1.06   | 1.52E-06 |
| At5g45550 | Mob1/phocein family protein                                                                                  | 1.137  | 8.13E-07 |
| At5g45630 | Protein of unknown function, DUF584                                                                          | 2.632  | 6.50E-08 |
| At5g45650 | subtilase family protein                                                                                     | -1.294 | 6.43E-06 |
| At5g45710 | AT-HSFA4C (HEAT SHOCK TRANSCRIPTION FACTOR A4C); member of Heat Stress Transcription Fact                    | 1.202  | 8.10E-08 |
| At5g45820 | CIPK20 (CBL-interacting protein kinase 20); Encodes a CBL-interacting serine/threonine protein kinase comp   | -2.035 | 1.82E-06 |
| At5g46050 | ATPTR3 (ARABIDOPSIS THALIANA PEPTIDE TRANSPORTER 3); Encodes a di- and tri-peptide transpor                  | -1.614 | 3.49E-06 |
| At5g46080 | Protein kinase superfamily protein                                                                           | 2.159  | 2.14E-09 |
| At5g46170 | F-box family protein                                                                                         | 1.754  | 1.62E-09 |
| At5g46200 | Protein of Unknown Function (DUF239)                                                                         | 5.4    | 4.44E-13 |
| At5g46230 | Protein of unknown function, DUF538                                                                          | 1.166  | 1.21E-05 |
| At5g46240 | KAT1 (potassium channel in Arabidopsis thaliana 1); Encodes a potassium channel protein (KAT1). ABA trig     | -1.937 | 1.03E-08 |
| At5g46270 | Disease resistance protein (TIR-NBS-LRR class) family                                                        | -1.348 | 4.20E-06 |
| At5g46295 | unknown protein                                                                                              | 3.099  | 6.55E-09 |
| At5g46330 | FLS2 (FLAGELLIN-SENSITIVE 2); Encodes a leucine-rich repeat serine/threonine protein kinase that is expr     | -1.348 | 6.86E-09 |
| At5g46410 | SSP4 (SCP1-like small phosphatase 4); Encodes a SCP1-like small phosphatase (SSP). Three SSPs form a uni     | 1.865  | 8.74E-06 |
| At5g46470 | RPS6 (RESISTANT TO P. SYRINGAE 6); Encodes RPS6 (RESISTANT TO P. SYRINGAE 6), a member of                    | 1.932  | 5.01E-05 |
| At5g46490 | Disease resistance protein (TIR-NBS-LRR class) family                                                        | 1.233  | 6.05E-05 |
| At5g46580 | pentatricopeptide (PPR) repeat-containing protein                                                            | -1.092 | 7.69E-07 |
| At5g46600 | Aluminium activated malate transporter family protein                                                        | -1.579 | 1.38E-05 |
| At5g46610 | Aluminium activated malate transporter family protein                                                        | 1.723  | 2.68E-08 |
| At5g46710 | PLATZ transcription factor family protein                                                                    | 1.278  | 5.74E-07 |
| At5g46780 | VQ motif-containing protein                                                                                  | 1.911  | 9.97E-08 |
| At5g46910 | Transcription factor jumonji (jmj) family protein / zinc finger (C5HC2 type) family protein                  | 2.831  | 6.62E-11 |
| At5g47070 | Protein kinase superfamily protein                                                                           | 1.514  | 2.86E-07 |
| At5g47075 | LCR20 (low-molecular-weight cysteine-rich 20); Encodes a member of a family of small,secreted, cysteine ricl | 1.43   | 0.00045  |
| At5g47077 | LCR6 (low-molecular-weight cysteine-rich 6); Encodes a member of a family of small,secreted, cysteine rich p | 2.906  | 2.91E-10 |
| At5g47120 | ATBI-1 (ARABIDOPSIS BAX INHIBITOR 1); Encodes BI-1, a homolog of mammalian Bax inhibitor 1. Fun              | 3.127  | 1.98E-10 |
| At5g47160 | YDG/SRA domain-containing protein                                                                            | 1.927  | 3.01E-08 |

|           |                                                                                                                                   |        |          |
|-----------|-----------------------------------------------------------------------------------------------------------------------------------|--------|----------|
| At5g47175 | LCR3 (low-molecular-weight cysteine-rich 3); Encodes a member of a family of small, secreted, cysteine rich p                     | 2.707  | 3.15E-10 |
| At5g47230 | ATERF-5 (ETHYLENE RESPONSIVE ELEMENT BINDING FACTOR- 5); encodes a member of the ERF (e                                           | 1.026  | 0.00387  |
| At5g47240 | atnudt8 (nudix hydrolase homolog 8)                                                                                               | -2.242 | 1.63E-07 |
| At5g47250 | LRR and NB-ARC domains-containing disease resistance protein                                                                      | 1.711  | 1.42E-09 |
| At5g47330 | alpha/beta-Hydrolases superfamily protein                                                                                         | -1.818 | 3.10E-06 |
| At5g47370 | HAT2 (Homeobox-leucine zipper protein 4 (HB-4) / HD-ZIP protein); homeobox-leucine zipper genes induce                            | -1.804 | 3.21E-08 |
| At5g47550 | Cystatin/monellin superfamily protein                                                                                             | -1.153 | 4.87E-08 |
| At5g47560 | ATTD1 (TONOPLAST DICARBOXYLATE TRANSPORTER); Encodes a tonoplast malate/fumarate transpo                                          | -1.006 | 0.0001   |
| At5g47610 | RING/U-box superfamily protein                                                                                                    | 3.406  | 4.41E-12 |
| At5g47780 | GAUT4 (galacturonosyltransferase 4); Encodes a protein with putative galacturonosyltransferase activity.                          | -1.11  | 1.66E-07 |
| At5g47800 | Phototropic-responsive NPH3 family protein                                                                                        | -1.056 | 4.26E-06 |
| At5g47830 | unknown protein                                                                                                                   | 3.777  | 2.50E-12 |
| At5g47910 | RBOHD (respiratory burst oxidase homologue D); NADPH/respiratory burst oxidase protein D (RbohD). Inter:                          | 1.377  | 1.64E-05 |
| At5g47960 | ATRABA4C (RAB GTPase homolog A4C); Encodes a small molecular weight g-protein.                                                    | 1.849  | 2.52E-06 |
| At5g48030 | GFA2 (gametophytic factor 2); encodes a mitochondrially targeted DNAJ protein involved in female gametopl                         | 1.21   | 8.58E-08 |
| At5g48180 | NSP5 (nitrile specifier protein 5); Encodes a nitrile-specifier protein NSP5. NSP5 is one out of five (At3g1640                   | 2.625  | 2.29E-09 |
| At5g48380 | BIR1 (BAK1-interacting receptor-like kinase 1); Encodes a BAK1-interacting receptor-like kinase named BIR                         | 1.028  | 3.62E-06 |
| At5g48430 | Eukaryotic aspartyl protease family protein                                                                                       | -1.355 | 0.00194  |
| At5g48460 | Actin binding Calponin homology (CH) domain-containing protein                                                                    | -1.078 | 1.19E-06 |
| At5g48530 | unknown protein                                                                                                                   | 2.938  | 5.43E-11 |
| At5g48540 | receptor-like protein kinase-related family protein                                                                               | 4.45   | 5.42E-10 |
| At5g48570 | FKBP-type peptidyl-prolyl cis-trans isomerase family protein                                                                      | 5.906  | 2.30E-12 |
| At5g48610 | unknown protein                                                                                                                   | 1.754  | 2.26E-08 |
| At5g48655 | RING/U-box superfamily protein                                                                                                    | 1.37   | 8.27E-08 |
| At5g48657 | defense protein-related                                                                                                           | 2.874  | 3.05E-07 |
| At5g48730 | Pentatricopeptide repeat (PPR) superfamily protein                                                                                | -1.167 | 7.69E-08 |
| At5g48850 | ATSD1 (SULPHUR DEFICIENCY-INDUCED 1); homologous to the wheat sulphate deficiency-induced gen                                     | 3.979  | 1.26E-07 |
| At5g48900 | Pectin lyase-like superfamily protein                                                                                             | -1.817 | 1.11E-09 |
| At5g49015 | Expressed protein                                                                                                                 | -1.258 | 2.05E-06 |
| At5g49170 | unknown protein                                                                                                                   | -1.632 | 1.29E-07 |
| At5g49200 | WD-40 repeat family protein / zfw4 protein (ZFWD4)                                                                                | 3.42   | 1.04E-08 |
| At5g49360 | ATBXL1 (BETA-XYLOSIDASE 1); Encodes a bifunctional {beta}-D-xylosidase/{alpha}-L-arabinofuranosid                                 | -1.523 | 4.21E-05 |
| At5g49390 | LOCATED IN: endomembrane system                                                                                                   | 1.269  | 0.0072   |
| At5g49480 | ATCP1 (Ca <sup>2+</sup> -binding protein 1); AtCP1 encodes a novel Ca <sup>2+</sup> -binding protein, which shares sequence simil | 2.626  | 9.49E-09 |
| At5g49525 | unknown protein                                                                                                                   | -1.172 | 2.45E-07 |
| At5g49600 | Protein of unknown function, DUF538                                                                                               | -1.862 | 0.00012  |
| At5g49660 | Leucine-rich repeat transmembrane protein kinase family protein                                                                   | -1.942 | 5.53E-08 |
| At5g49730 | ATFRO6 (ferric reduction oxidase 6); Encodes a plasma membrane-located ferric chelate reductase. Its mRNA                         | -1.537 | 0.0001   |
| At5g49930 | emb1441 (embryo defective 1441)                                                                                                   | 1.297  | 7.53E-07 |
| At5g49960 | unknown protein                                                                                                                   | -1.25  | 2.15E-07 |
| At5g50030 | Plant invertase/pectin methylesterase inhibitor superfamily protein                                                               | 3.938  | 4.44E-13 |
| At5g50100 | Putative thiol-disulphide oxidoreductase DCC                                                                                      | 1.563  | 1.49E-07 |
| At5g50120 | Transducin/WD40 repeat-like superfamily protein                                                                                   | -1.317 | 0.00046  |
| At5g50240 | PIMT2 (protein-l-isoaspartate methyltransferase 2); L-isoaspartyl methyltransferase 2 (PIMT2) gene, alternativ                    | 2.717  | 4.09E-10 |
| At5g50335 | unknown protein                                                                                                                   | -1.613 | 4.84E-07 |
| At5g50450 | HCP-like superfamily protein with MYND-type zinc finger                                                                           | -1.155 | 1.54E-06 |
| At5g50610 | unknown protein                                                                                                                   | -1.321 | 5.74E-05 |
| At5g50740 | Heavy metal transport/detoxification superfamily protein                                                                          | -1.033 | 6.19E-06 |
| At5g50760 | SAUR-like auxin-responsive protein family                                                                                         | -1.104 | 8.87E-05 |
| At5g50780 | Histidine kinase-, DNA gyrase B-, and HSP90-like ATPase family protein                                                            | 1.376  | 5.74E-07 |
| At5g50790 | Nodulin MtN3 family protein                                                                                                       | -1.722 | 0.00143  |
| At5g50800 | Nodulin MtN3 family protein                                                                                                       | -2.582 | 4.76E-05 |
| At5g50820 | anac097 (NAC domain containing protein 97)                                                                                        | -1.238 | 8.34E-07 |
| At5g50915 | basic helix-loop-helix (bHLH) DNA-binding superfamily protein                                                                     | 1.742  | 9.78E-06 |
| At5g50960 | ATNBP35 (NUCLEOTIDE BINDING PROTEIN 35); Highly similar to Saccharomyces cerevisiae NBP35, loc                                    | 1.031  | 1.52E-06 |
| At5g51050 | Mitochondrial substrate carrier family protein                                                                                    | 1.193  | 2.92E-08 |
| At5g51060 | ATRBOHC (A. THALIANA RESPIRATORY BURST OXIDASE HOMOLOG C); RHD2 (along with RHD3                                                  | 1.969  | 4.56E-06 |
| At5g51130 | S-adenosyl-L-methionine-dependent methyltransferases superfamily protein                                                          | 1.336  | 9.74E-07 |
| At5g51370 | RNI-like superfamily protein                                                                                                      | 1.66   | 5.79E-10 |
| At5g51420 | long-chain-alcohol O-fatty-acyltransferase family protein / wax synthase family protein                                           | 1.825  | 0.00012  |
| At5g51430 | EYE (EMBRYO YELLOW); Encodes a protein that is homologous to Cog7, a subunit of the conserved oligon                              | 2.07   | 7.02E-09 |
| At5g51440 | HSP20-like chaperones superfamily protein                                                                                         | 7.403  | 4.78E-12 |
| At5g51451 | RGF5 (root meristem growth factor 5); Encodes a root meristem growth factor (RGF). Belongs to a family of 1                       | 2.144  | 1.60E-08 |
| At5g51550 | EXL3 (EXORDIUM like 3)                                                                                                            | -1.098 | 1.94E-05 |
| At5g51630 | Disease resistance protein (TIR-NBS-LRR class) family                                                                             | 2.572  | 4.57E-10 |
| At5g51670 | Protein of unknown function (DUF668)                                                                                              | -1.348 | 9.26E-07 |
| At5g51720 | 2 iron, 2 sulfur cluster binding                                                                                                  | 1.063  | 3.82E-05 |

|           |                                                                                                              |        |          |
|-----------|--------------------------------------------------------------------------------------------------------------|--------|----------|
| At5g51740 | Peptidase family M48 family protein                                                                          | 3.118  | 6.57E-12 |
| At5g51790 | basic helix-loop-helix (bHLH) DNA-binding superfamily protein                                                | -1.651 | 1.31E-05 |
| At5g51810 | GA20OX2 (gibberellin 20 oxidase 2); Encodes gibberellin 20-oxidase. Involved in gibberellin biosynthesis. U  | -1.429 | 1.17E-07 |
| At5g51830 | pfkB-like carbohydrate kinase family protein                                                                 | 1.609  | 6.73E-07 |
| At5g52000 | IMPA-8 (importin alpha isoform 8); Putative importin alpha isoform. When overexpressed can rescue the imp    | 2.99   | 2.78E-08 |
| At5g52020 | Integrase-type DNA-binding superfamily protein; encodes a member of the DREB subfamily A-4 of ERF/AP2        | 1.203  | 2.07E-05 |
| At5g52120 | AtPP2-A14 (phloem protein 2-A14)                                                                             | -1.317 | 6.20E-07 |
| At5g52250 | Transducin/WD40 repeat-like superfamily protein; Encodes a transducin protein whose gene expression is ind   | -1.83  | 6.88E-10 |
| At5g52280 | Myosin heavy chain-related protein                                                                           | -1.121 | 4.70E-07 |
| At5g52310 | COR78 (COLD REGULATED 78); cold regulated gene, the 5' region of cor78 has cis-acting regulatory elemen      | -1.331 | 6.70E-06 |
| At5g52570 | BCH2 (BETA CAROTENOID HYDROXYLASE 2); Converts &#946;-carotene to zeaxanthin via cryptoxanth                 | 5.062  | 4.93E-11 |
| At5g52580 | RabGAP/TBC domain-containing protein                                                                         | 1.046  | 6.03E-05 |
| At5g52610 | F-box and associated interaction domains-containing protein                                                  | 1.133  | 0.00104  |
| At5g52640 | AtHsp90-1 (HEAT SHOCK PROTEIN 90-1); Encodes a cytosolic heat shock protein AtHSP90.1. AtHSP90.1             | 6.235  | 3.98E-11 |
| At5g52740 | Copper transport protein family                                                                              | 1.765  | 5.01E-06 |
| At5g52750 | Heavy metal transport/detoxification superfamily protein                                                     | 2.155  | 4.05E-07 |
| At5g52760 | Copper transport protein family                                                                              | 2.835  | 0.0003   |
| At5g52790 | CBS domain-containing protein with a domain of unknown function (DUF21)                                      | 2.816  | 1.44E-10 |
| At5g52830 | ATWRKY27 (ARABIDOPSIS THALIANA WRKY DNA-BINDING PROTEIN 27); Encodes a WRKY transc                           | -1.029 | 3.06E-06 |
| At5g52882 | P-loop containing nucleoside triphosphate hydrolases superfamily protein                                     | -1.042 | 9.29E-06 |
| At5g52900 | unknown protein                                                                                              | -1.57  | 1.21E-06 |
| At5g53000 | TAP46 (2A phosphatase associated protein of 46 kD); PP2A-associated protein with a possible function in the  | 1.54   | 2.75E-09 |
| At5g53020 | Ribonuclease P protein subunit P38-related                                                                   | -1.262 | 2.71E-07 |
| At5g53048 | other RNA; Potential natural antisense gene, locus overlaps with AT5G53050                                   | -1.783 | 0.0002   |
| At5g53050 | alpha/beta-Hydrolases superfamily protein                                                                    | 1.78   | 9.91E-09 |
| At5g53120 | ATSPDS3 (SPERMIDINE SYNTHASE 3); encodes a novel spermine synthase and is a paralog of previously c          | 1.505  | 7.76E-07 |
| At5g53200 | TRY (TRIPTYCHON)                                                                                             | 1.013  | 0.00018  |
| At5g53400 | BOB1 (BOBBER1); Encodes BOBBER1 (BOB1), a non-canonical small heat shock protein required for both           | 3.093  | 1.62E-11 |
| At5g53460 | GLT1 (NADH-dependent glutamate synthase 1); NADH-dependent glutamate synthase                                | -1.374 | 1.05E-05 |
| At5g53550 | ATYSL3 (YELLOW STRIPE LIKE 3)                                                                                | -1.549 | 3.48E-07 |
| At5g53680 | RNA-binding (RRM/RBD/RNP motifs) family protein                                                              | 6.153  | 5.22E-15 |
| At5g53730 | Late embryogenesis abundant (LEA) hydroxyproline-rich glycoprotein family                                    | -1.861 | 4.53E-07 |
| At5g53870 | ENODL1 (early nodulin-like protein 1)                                                                        | 1.019  | 0.00022  |
| At5g53880 | unknown protein                                                                                              | -1.191 | 1.57E-07 |
| At5g53890 | PSKR2 (phytosylfokine-alpha receptor 2); Encodes a leucine-rich repeat receptor kinase (LRR-RK) involved in  | -1.286 | 1.52E-08 |
| At5g53970 | Tyrosine transaminase family protein; encodes tyrosine aminotransferase which is strongly induced upon aging | 2.081  | 2.52E-08 |
| At5g53980 | ATHB52 (homeobox protein 52); Encodes a homeodomain leucine zipper class I (HD-Zip I) protein.               | -1.573 | 1.02E-05 |
| At5g54145 | unknown protein                                                                                              | -2.087 | 1.92E-09 |
| At5g54165 | unknown protein                                                                                              | 8.589  | 1.46E-12 |
| At5g54190 | PORA (protochlorophyllide oxidoreductase A); light-dependent NADPH:protochlorophyllide oxidoreductase /      | -1.986 | 0.0026   |
| At5g54300 | Protein of unknown function (DUF761)                                                                         | 1.692  | 7.17E-08 |
| At5g54470 | B-box type zinc finger family protein                                                                        | 1.246  | 0.00016  |
| At5g54490 | PBP1 (pinoid-binding protein 1); Encodes a PINOID (PID)-binding protein containing putative EF-hand calci    | 1.883  | 8.08E-07 |
| At5g54510 | DFL1 (DWARF IN LIGHT 1); Encodes an IAA-amido synthase that conjugates Ala, Asp, Phe, and Trp to auxi        | -1.741 | 1.74E-08 |
| At5g54585 | unknown protein                                                                                              | -1.539 | 1.18E-05 |
| At5g54660 | HSP20-like chaperones superfamily protein                                                                    | -1.089 | 1.77E-05 |
| At5g54690 | GAUT12 (galacturonosyltransferase 12); Encodes a protein with putative galacturonosyltransferase activity. N | 1.493  | 4.21E-08 |
| At5g54710 | Ankyrin repeat family protein                                                                                | 1.888  | 1.54E-07 |
| At5g54860 | Major facilitator superfamily protein                                                                        | 2.992  | 4.48E-11 |
| At5g54870 | unknown protein                                                                                              | 1.117  | 1.73E-05 |
| At5g55050 | GDSL-like Lipase/Acylhydrolase superfamily protein                                                           | 1.685  | 3.87E-05 |
| At5g55240 | ATPXG2 (ARABIDOPSIS THALIANA PEROXYGENASE 2); Catalyze hydroperoxide-dependent mono-oxy                      | 1.471  | 3.71E-06 |
| At5g55250 | IAMT1 (IAA carboxylmethyltransferase 1); Encodes an enzyme which specifically converts IAA to its methyl     | -1.01  | 0.0013   |
| At5g55410 | Bifunctional inhibitor/lipid-transfer protein/seed storage 2S albumin superfamily protein                    | -2.677 | 0.00194  |
| At5g55420 | Encodes a Protease inhibitor/seed storage/LTP family protein [pseudogene]; Encodes a Protease inhibitor/seed | -1.239 | 0.00021  |
| At5g55460 | Bifunctional inhibitor/lipid-transfer protein/seed storage 2S albumin superfamily protein                    | -1.131 | 0.00214  |
| At5g55580 | Mitochondrial transcription termination factor family protein                                                | -1.098 | 2.74E-07 |
| At5g55620 | unknown protein                                                                                              | -1.047 | 9.54E-06 |
| At5g55690 | MADS-box transcription factor family protein                                                                 | -2.599 | 4.66E-05 |
| At5g55840 | Pentatricopeptide repeat (PPR) superfamily protein                                                           | 1.391  | 3.17E-09 |
| At5g55970 | RING/U-box superfamily protein                                                                               | 1.682  | 4.52E-06 |
| At5g56010 | AtHsp90-3 (HEAT SHOCK PROTEIN 90-3); A member of heat shock protein 90 (HSP90) gene family. Expre            | 1.114  | 6.46E-06 |
| At5g56030 | AtHsp90.2 (HEAT SHOCK PROTEIN 90.2); A member of heat shock protein 90 (HSP90) gene family. Expre            | 1.26   | 4.25E-07 |
| At5g56040 | Leucine-rich receptor-like protein kinase family protein                                                     | -1.191 | 9.48E-08 |
| At5g56150 | UBC30 (ubiquitin-conjugating enzyme 30)                                                                      | 1.484  | 1.59E-06 |
| At5g56310 | Pentatricopeptide repeat (PPR) superfamily protein                                                           | -1.201 | 4.91E-06 |
| At5g56320 | ATEXPA14 (expansin A14); member of Alpha-Expansin Gene Family. Naming convention from the Expansir           | -1.673 | 3.98E-08 |

|           |                                                                                                                                  |        |          |
|-----------|----------------------------------------------------------------------------------------------------------------------------------|--------|----------|
| At5g56350 | Pyruvate kinase family protein                                                                                                   | 1.025  | 2.26E-05 |
| At5g56430 | F-box/FBD-like domains containing protein                                                                                        | 1.226  | 8.50E-06 |
| At5g56600 | PFN3 (PROFILIN 3); Encodes profilin3, a low-molecular weight, actin monomer-binding protein that regulate                        | 1.342  | 6.90E-10 |
| At5g56690 | FBD, F-box and Leucine Rich Repeat domains containing protein                                                                    | 1.137  | 3.08E-07 |
| At5g56750 | NDL1 (N-MYC downregulated-like 1)                                                                                                | 2.909  | 6.76E-11 |
| At5g56840 | myb-like transcription factor family protein                                                                                     | 1.201  | 0.00011  |
| At5g56870 | BGAL4 (beta-galactosidase 4)                                                                                                     | -1.683 | 1.20E-05 |
| At5g56880 | unknown protein                                                                                                                  | 1.728  | 2.35E-06 |
| At5g56960 | basic helix-loop-helix (bHLH) DNA-binding family protein                                                                         | 5.512  | 2.95E-11 |
| At5g57010 | calmodulin-binding family protein                                                                                                | 1.804  | 0.00024  |
| At5g57035 | U-box domain-containing protein kinase family protein                                                                            | 1.64   | 1.87E-08 |
| At5g57050 | ABI2 (ABA INSENSITIVE 2); Encodes a protein phosphatase 2C and is involved in ABA signal transduction.                           | 3.337  | 2.03E-10 |
| At5g57060 | FUNCTIONS IN: molecular_function unknown; INVOLVED IN: defense response to Gram-negative bacteriu                                | 1.003  | 8.75E-07 |
| At5g57110 | ACA8 (autoinhibited Ca <sup>2+</sup> -ATPase, isoform 8); Arabidopsis-autoinhibited Ca <sup>2+</sup> -ATPase, isoform 8, contain | -1.28  | 0.0001   |
| At5g57123 | unknown protein                                                                                                                  | 2.049  | 1.04E-05 |
| At5g57180 | CIA2 (chloroplast import apparatus 2); Transcription regulator responsible for specific upregulation of the tra                  | -1.052 | 8.23E-07 |
| At5g57220 | CYP81F2 (cytochrome P450, family 81, subfamily F, polypeptide 2); member of CYP81F, involved in glucosi                          | 1.463  | 4.36E-05 |
| At5g57260 | CYP71B10 (cytochrome P450, family 71, subfamily B, polypeptide 10); putative cytochrome P450                                     | 1.884  | 7.45E-07 |
| At5g57350 | AHA3 (H <sup>+</sup> -ATPase 3); member of Plasma membrane H <sup>+</sup> -ATPase family                                         | -1.433 | 1.11E-07 |
| At5g57567 | unknown protein                                                                                                                  | -1.29  | 4.55E-07 |
| At5g57570 | GCK domain-containing protein                                                                                                    | -1.247 | 1.86E-06 |
| At5g57630 | CIPK21 (CBL-interacting protein kinase 21); CBL-interacting protein kinase                                                       | -2.076 | 3.28E-10 |
| At5g57640 | GCK domain-containing protein                                                                                                    | -1.507 | 1.77E-05 |
| At5g57685 | ATGDU3 (ARABIDOPSIS THALIANA GLUTAMINE DUMPER 3); Encodes a member of the GDU (glutam                                            | -1.113 | 3.09E-06 |
| At5g57710 | Double Clp-N motif-containing P-loop nucleoside triphosphate hydrolases superfamily protein                                      | -1.087 | 5.21E-07 |
| At5g57760 | unknown protein                                                                                                                  | -3.738 | 1.23E-09 |
| At5g57770 | Plant protein of unknown function (DUF828) with plant pleckstrin homology-like region                                            | -1.257 | 1.88E-05 |
| At5g57780 | EXPRESSED IN: 18 plant structures                                                                                                | -1.558 | 1.44E-06 |
| At5g57910 | unknown protein                                                                                                                  | 2.82   | 1.50E-10 |
| At5g57920 | ENODL10 (early nodulin-like protein 10)                                                                                          | 2.329  | 1.53E-08 |
| At5g58040 | ATFIP1[V] (homolog of yeast FIP1 [V]); Encodes a subunit of the polyadenylation apparatus that interacts wit                     | 1.599  | 7.50E-05 |
| At5g58070 | ATTIL (TEMPERATURE-INDUCED LIPOCALIN); Encodes a temperature-induced lipocalin TIL1. Involvec                                    | 2.466  | 2.16E-09 |
| At5g58110 | chaperone binding                                                                                                                | 2.171  | 3.95E-10 |
| At5g58120 | Disease resistance protein (TIR-NBS-LRR class) family                                                                            | 3.075  | 1.08E-08 |
| At5g58290 | RPT3 (regulatory particle triple-A ATPase 3); 26S proteasome AAA-ATPase subunit RPT3 (RPT3) mRNA,                                | 1.076  | 2.71E-05 |
| At5g58310 | ATMES18 (ARABIDOPSIS THALIANA METHYL ESTERASE 18); Encodes a protein shown to have methy                                         | 1.743  | 7.53E-05 |
| At5g58320 | Kinase interacting (KIP1-like) family protein                                                                                    | 1.256  | 2.85E-06 |
| At5g58360 | ATOPF3 (ARABIDOPSIS THALIANA OVATE FAMILY PROTEIN 3)                                                                             | -1.276 | 2.32E-07 |
| At5g58430 | ATEXO70B1 (exocyst subunit exo70 family protein B1); A member of EXO70 gene family, putative exocyst                             | 1.937  | 2.31E-10 |
| At5g58570 | unknown protein                                                                                                                  | -2.148 | 2.17E-07 |
| At5g58580 | ATL63 (TOXICOS EN LEVADURA 63)                                                                                                   | -1.3   | 1.04E-05 |
| At5g58590 | RANBP1 (RAN binding protein 1); Encodes a Ran-binding protein 1 homolog (RanBP1).                                                | 1.304  | 9.42E-08 |
| At5g58660 | 2-oxoglutarate (2OG) and Fe(II)-dependent oxygenase superfamily protein                                                          | -1.765 | 9.09E-06 |
| At5g58670 | ATPLC (ARABIDOPSIS THALIANA PHOSPHOLIPASE C); phosphatidylinositol-specific phospholipase C i                                    | -1.698 | 7.74E-07 |
| At5g58680 | ARM repeat superfamily protein                                                                                                   | 2.479  | 1.37E-10 |
| At5g58760 | DDB2 (damaged DNA binding 2); Encodes a DDB1a interacting protein DDB2 required for UV-B tolerance a                             | 1.42   | 0.00013  |
| At5g58770 | Undecaprenyl pyrophosphate synthetase family protein                                                                             | 7.225  | 3.38E-12 |
| At5g58787 | RING/U-box superfamily protein                                                                                                   | 2.258  | 7.05E-11 |
| At5g58810 | subtilisin-like serine protease, pseudogene, contains similarity to prepro-cucumis GI:807698 from (Cucumis                       | 2.965  | 3.90E-09 |
| At5g58830 | Subtilisin-like serine endopeptidase family protein                                                                              | 1.491  | 1.94E-06 |
| At5g58850 | ATMYB119 (MYB DOMAIN PROTEIN 119); Encodes a putative transcription factor, member of the R2R3 f                                 | 1.032  | 2.13E-07 |
| At5g58900 | Homeodomain-like transcriptional regulator                                                                                       | -1.484 | 1.45E-07 |
| At5g58940 | CRCK1 (calmodulin-binding receptor-like cytoplasmic kinase 1); Arabidopsis thaliana calmodulin-binding rec                       | 1.558  | 1.03E-07 |
| At5g59020 | Protein of unknown function (DUF3527)                                                                                            | -1.033 | 1.61E-07 |
| At5g59080 | unknown protein                                                                                                                  | -1.647 | 2.00E-06 |
| At5g59220 | HAI1 (highly ABA-induced PP2C gene 1)                                                                                            | 1.266  | 3.42E-06 |
| At5g59230 | transcription factor-related                                                                                                     | 2.087  | 3.32E-07 |
| At5g59340 | WOX2 (WUSCHEL related homeobox 2); Encodes a WUSCHEL-related homeobox gene family member with                                    | 1.613  | 5.23E-06 |
| At5g59360 | unknown protein                                                                                                                  | -1.247 | 5.69E-07 |
| At5g59390 | XH/XS domain-containing protein                                                                                                  | 1.457  | 1.36E-05 |
| At5g59450 | GRAS family transcription factor                                                                                                 | 1.032  | 7.81E-05 |
| At5g59510 | DVL18 (DEVIL 18)                                                                                                                 | 1.091  | 0.00016  |
| At5g59520 | ZIP2 (ZRT/IRT-like protein 2); encodes a metal ion transporter whose expression is regulated by copper.                          | -1.014 | 0.0008   |
| At5g59530 | 2-oxoglutarate (2OG) and Fe(II)-dependent oxygenase superfamily protein                                                          | 1.101  | 4.69E-05 |
| At5g59540 | 2-oxoglutarate (2OG) and Fe(II)-dependent oxygenase superfamily protein                                                          | 2.122  | 7.26E-09 |
| At5g59550 | zinc finger (C3HC4-type RING finger) family protein                                                                              | 2.423  | 1.25E-07 |
| At5g59570 | Homeodomain-like superfamily protein                                                                                             | -1.747 | 4.84E-07 |

|           |                                                                                                               |        |          |
|-----------|---------------------------------------------------------------------------------------------------------------|--------|----------|
| At5g59630 | pseudogene, glycine-rich protein, blastp match of 53% identity and 5.4e-10 P-value to GP 9837280 gb AAG0C     | 1.734  | 1.62E-09 |
| At5g59720 | HSP18.2 (heat shock protein 18.2); encodes a low molecular weight heat shock protein that contains the heat s | 6.918  | 7.25E-13 |
| At5g59730 | ATEXO70H7 (exocyst subunit exo70 family protein H7); A member of EXO70 gene family, putative exocyst :        | 2.286  | 2.29E-07 |
| At5g59750 | DHBP synthase RibB-like alpha/beta domain                                                                     | 1.035  | 7.49E-07 |
| At5g59820 | RHL41 (RESPONSIVE TO HIGH LIGHT 41); Encodes a zinc finger protein involved in high light and cold ac         | 4.788  | 2.25E-08 |
| At5g59870 | HTA6 (histone H2A 6); Encodes HTA6, a histone H2A protein.                                                    | -1.209 | 5.71E-05 |
| At5g59920 | ULI3 (UV-B LIGHT INSENSITIVE 3); Isolated in a screen for UV-B insensitive mutants using a hypocotyl gr       | 1.295  | 3.07E-05 |
| At5g59970 | Histone superfamily protein                                                                                   | -1.111 | 6.07E-05 |
| At5g60100 | APRR3 (pseudo-response regulator 3); Encodes pseudo-response regulator 3 (APRR3/PRR3). PRR3 transcript        | -2.226 | 1.46E-07 |
| At5g60130 | AP2/B3-like transcriptional factor family protein                                                             | 2.386  | 3.00E-10 |
| At5g60170 | RNA binding (RRM/RBD/RNP motifs) family protein                                                               | 1.717  | 6.44E-05 |
| At5g60250 | zinc finger (C3HC4-type RING finger) family protein                                                           | 1.663  | 2.98E-05 |
| At5g60280 | Concanavalin A-like lectin protein kinase family protein                                                      | 1.329  | 1.06E-05 |
| At5g60400 | unknown protein                                                                                               | -1.095 | 1.44E-05 |
| At5g60610 | F-box/RNI-like superfamily protein                                                                            | 3.731  | 7.97E-12 |
| At5g60680 | Protein of unknown function, DUF584                                                                           | -1.318 | 3.12E-06 |
| At5g60710 | Zinc finger (C3HC4-type RING finger) family protein                                                           | -1.143 | 3.81E-07 |
| At5g60780 | ATNRT2.3 (ARABIDOPSIS THALIANA NITRATE TRANSPORTER 2.3); member of High affinity nitrate t                    | -1.447 | 3.07E-05 |
| At5g60800 | Heavy metal transport/detoxification superfamily protein                                                      | 1.973  | 9.46E-07 |
| At5g60890 | ATR1 (ALTERED TRYPTOPHAN REGULATION 1); Myb-like transcription factor that modulates expressio                | -1.64  | 1.53E-07 |
| At5g60900 | RLK1 (receptor-like protein kinase 1); Encodes a receptor-like protein kinase.                                | -1.893 | 0.00048  |
| At5g61000 | RPA70D (Replication factor-A protein 1-related)                                                               | -1.021 | 0.00041  |
| At5g61180 | Putative endonuclease or glycosyl hydrolase                                                                   | 1.657  | 0.00026  |
| At5g61190 | putative endonuclease or glycosyl hydrolase with C2H2-type zinc finger domain                                 | 2.233  | 1.54E-09 |
| At5g61210 | SNAP33 (soluble N-ethylmaleimide-sensitive factor adaptor protein 33); membrane localized t-SNARE SNAP        | 1.489  | 2.82E-07 |
| At5g61290 | Flavin-binding monooxygenase family protein                                                                   | -1.088 | 2.89E-06 |
| At5g61370 | Pentatricopeptide repeat (PPR) superfamily protein                                                            | -1.164 | 8.71E-06 |
| At5g61380 | AtTOC1 (TIMING OF CAB EXPRESSION 1); Pseudo response regulator involved in the generation of circad           | -1.257 | 1.53E-07 |
| At5g61420 | HAG1 (HIGH ALIPHATIC GLUCOSINOLATE 1); Encodes a nuclear localized member of the MYB transcrip                | -2.02  | 7.09E-09 |
| At5g61430 | ANAC100 (NAC domain containing protein 100)                                                                   | -1.391 | 4.01E-06 |
| At5g61510 | GroES-like zinc-binding alcohol dehydrogenase family protein                                                  | 1.91   | 6.55E-09 |
| At5g61520 | Major facilitator superfamily protein                                                                         | -1.072 | 8.98E-05 |
| At5g61560 | U-box domain-containing protein kinase family protein                                                         | 2.538  | 3.64E-10 |
| At5g61590 | Integrase-type DNA-binding superfamily protein; encodes a member of the ERF (ethylene response factor) sub    | -1.639 | 2.03E-07 |
| At5g61610 | Oleosin family protein                                                                                        | -1.357 | 1.71E-05 |
| At5g61650 | CYCP4.2 (CYCLIN P4.2); The P-type cyclins (CYCPs) share a conserved central region of 100 amino acids (C      | -2.381 | 7.66E-06 |
| At5g61660 | glycine-rich protein                                                                                          | -2.408 | 7.80E-09 |
| At5g61730 | ATATH11 (ARABIDOPSIS THALIANA ABC2 HOMOLOG 11); member of ATH subfamily                                       | 2.64   | 1.51E-10 |
| At5g61900 | BON1 (BONZAI 1); Encodes a plasma-membrane localized, copine-like protein, which is a member of a newl        | 1.186  | 1.46E-05 |
| At5g61980 | AGD1 (ARF-GAP domain 1); A member of ARF GAP domain (AGD), A thaliana has 15 members, grouped in              | 2.104  | 8.35E-09 |
| At5g62020 | AT-HSFB2A (ARABIDOPSIS THALIANA HEAT SHOCK TRANSCRIPTION FACTOR B2A); member of                               | 4.568  | 4.42E-12 |
| At5g62080 | Bifunctional inhibitor/lipid-transfer protein/seed storage 2S albumin superfamily protein                     | 1.454  | 1.24E-05 |
| At5g62090 | SLK2 (SEUSS-like 2)                                                                                           | 1.367  | 2.83E-08 |
| At5g62180 | AtCXE20 (carboxyesterase 20)                                                                                  | 1.672  | 7.94E-08 |
| At5g62200 | Embryo-specific protein 3, (ATS3)                                                                             | 1.159  | 1.74E-08 |
| At5g62280 | Protein of unknown function (DUF1442)                                                                         | -3.725 | 3.97E-09 |
| At5g62350 | Plant invertase/pectin methylesterase inhibitor superfamily protein                                           | -1.436 | 2.21E-07 |
| At5g62360 | Plant invertase/pectin methylesterase inhibitor superfamily protein                                           | -2.885 | 8.20E-08 |
| At5g62430 | CDF1 (cycling DOF factor 1); Dof-type zinc finger domain-containing protein, similar to H-protein promoter b  | 2.398  | 1.09E-08 |
| At5g62480 | ATGSTU9 (glutathione S-transferase tau 9); Encodes glutathione transferase belonging to the tau class of GST  | 1.06   | 0.01972  |
| At5g62520 | similar to RCD one 5 (SRO5); FUNCTIONS IN: NAD+ ADP-ribosyltransferase activity; INVOLVED IN: oxy,            | 1.894  | 0.0015   |
| At5g62570 | Calmodulin binding protein-like                                                                               | 1.074  | 2.15E-05 |
| At5g62620 | Galactosyltransferase family protein                                                                          | 2.248  | 1.26E-10 |
| At5g62623 | Putative membrane lipoprotein; Encodes a defensin-like (DEFL) family protein.                                 | 1.755  | 2.38E-09 |
| At5g62627 | Putative membrane lipoprotein; Encodes a defensin-like (DEFL) family protein.                                 | 1.199  | 0.00012  |
| At5g62630 | HIPL2 (hipl2 protein precursor)                                                                               | -1.404 | 1.24E-07 |
| At5g62680 | Major facilitator superfamily protein                                                                         | -1.238 | 1.67E-07 |
| At5g62720 | Integral membrane HPP family protein                                                                          | -2.265 | 5.26E-09 |
| At5g62730 | Major facilitator superfamily protein                                                                         | -2.222 | 3.97E-05 |
| At5g62770 | Protein of unknown function (DUF1645)                                                                         | 1.204  | 1.68E-05 |
| At5g62850 | AtVEX1 (VEGETATIVE CELL EXPRESSED1); Encodes a protein that is expressed in vegetative cells of pol           | -1.249 | 4.68E-06 |
| At5g62900 | unknown protein                                                                                               | -1.111 | 5.53E-07 |
| At5g62920 | ARR6 (response regulator 6); Encodes a Type-A response regulator that is responsive to cytokinin treatment. ] | -1.286 | 3.44E-06 |
| At5g62990 | emb1692 (embryo defective 1692)                                                                               | -1.235 | 2.93E-06 |
| At5g63070 | Ribosomal protein S19 family protein                                                                          | 2.358  | 2.09E-09 |
| At5g63130 | Octicosapeptide/Phox/Bem1p family protein                                                                     | 1.439  | 4.57E-06 |
| At5g63160 | BT1 (BTB and TAZ domain protein 1); BTB and TAZ domain protein. Short-lived nuclear-cytoplasmic protei        | -2.367 | 1.70E-05 |

|           |                                                                                                             |        |          |
|-----------|-------------------------------------------------------------------------------------------------------------|--------|----------|
| At5g63180 | Pectin lyase-like superfamily protein                                                                       | -1.319 | 1.33E-07 |
| At5g63195 | other RNA; Potential natural antisense gene, locus overlaps with AT5G63190                                  | 1.565  | 7.82E-08 |
| At5g63300 | Ribosomal protein S21 family protein                                                                        | 3.153  | 4.89E-10 |
| At5g63350 | unknown protein                                                                                             | 1.259  | 2.78E-06 |
| At5g63390 | O-fucosyltransferase family protein                                                                         | 1.761  | 7.34E-08 |
| At5g63420 | emb2746 (embryo defective 2746)                                                                             | -1.127 | 2.22E-05 |
| At5g63500 | Protein of unknown function (DUF 3339)                                                                      | 2.528  | 3.38E-10 |
| At5g63710 | Leucine-rich repeat protein kinase family protein                                                           | -1.139 | 3.38E-06 |
| At5g63770 | ATDGK2 (diacylglycerol kinase 2); a member of the diacylglycerol kinase gene family. Encodes a functional d | 1.905  | 2.19E-07 |
| At5g63790 | ANAC102 (NAC domain containing protein 102); Encodes a member of the NAC family of transcription facto      | 1.702  | 3.18E-09 |
| At5g63800 | BGAL6 (beta-galactosidase 6); Involved in mucilage formation. Mutants form columella and outer cell wall ar | -1.314 | 1.22E-05 |
| At5g63810 | BGAL10 (beta-galactosidase 10); member of Glycoside Hydrolase Family 35                                     | -1.715 | 1.07E-06 |
| At5g63820 | Protein of unknown function (DUF626)                                                                        | -1.41  | 9.90E-07 |
| At5g63830 | HIT-type Zinc finger family protein                                                                         | 1.181  | 9.09E-07 |
| At5g63850 | AAP4 (amino acid permease 4); Amino acid transporter whose expression is downregulated by dehydration.      | -1.929 | 1.15E-08 |
| At5g64000 | SAL2 (Inositol monophosphatase family protein); 3'(2'),5'-bisphosphate nucleotidase                         | -1.712 | 0.00322  |
| At5g64110 | Peroxidase superfamily protein                                                                              | -1.199 | 0.00271  |
| At5g64170 | dentin sialophosphoprotein-related                                                                          | 1.787  | 1.25E-06 |
| At5g64190 | unknown protein                                                                                             | -1.67  | 4.42E-05 |
| At5g64200 | ATSC35 (ARABIDOPSIS THALIANA ORTHOLOG OF HUMAN SPLICING FACTOR SC35); encodes an S                          | 1.298  | 5.29E-08 |
| At5g64230 | unknown protein                                                                                             | 3.374  | 3.56E-10 |
| At5g64250 | Aldolase-type TIM barrel family protein                                                                     | 1.486  | 2.43E-06 |
| At5g64310 | AGP1 (arabinogalactan protein 1); Encodes arabinogalactan-protein (AGP1).                                   | 1.386  | 9.81E-07 |
| At5g64400 | CONTAINS InterPro DOMAIN/s: CHCH (InterPro:IPR010625); BEST Arabidopsis thaliana protein match is:          | 1.241  | 3.74E-08 |
| At5g64410 | ATOPT4 (ARABIDOPSIS THALIANA OLIGOPEPTIDE TRANSPORTER 4); oligopeptide transporter                          | -1.366 | 6.31E-08 |
| At5g64490 | ARM repeat superfamily protein                                                                              | -1.307 | 1.38E-06 |
| At5g64510 | unknown protein                                                                                             | 6.581  | 6.17E-13 |
| At5g64572 | other RNA; Potential natural antisense gene, locus overlaps with AT5G64570                                  | -1.083 | 1.05E-05 |
| At5g64640 | Plant invertase/pectin methylesterase inhibitor superfamily                                                 | -1.087 | 3.48E-06 |
| At5g64700 | nodulin MtN21 /EamA-like transporter family protein                                                         | -1.204 | 3.70E-05 |
| At5g64750 | ABR1 (ABA REPRESSOR1); Encodes a putative transcription factor containing an AP2 domain. Is a member        | 2.422  | 3.59E-08 |
| At5g64770 | RGF9 (root meristem growth factor 9); Encodes a root meristem growth factor (RGF). Belongs to a family of 1 | -1.858 | 5.23E-08 |
| At5g64840 | ATGCN5 (general control non-repressible 5); member of GCN subfamily                                         | 1.097  | 1.69E-06 |
| At5g64905 | PROPEP3 (elicitor peptide 3 precursor)                                                                      | 1.258  | 6.13E-05 |
| At5g64910 | unknown protein                                                                                             | 1.524  | 8.87E-07 |
| At5g64930 | CPR5 (CONSTITUTIVE EXPRESSION OF PR GENES 5); Regulator of expression of pathogenesis-related (I            | 1.382  | 2.22E-07 |
| At5g64950 | Mitochondrial transcription termination factor family protein                                               | 2.866  | 9.81E-11 |
| At5g65010 | ASN2 (asparagine synthetase 2); Encodes asparagine synthetase (ASN2).                                       | -1.246 | 6.75E-06 |
| At5g65200 | ATPUB38 (ARABIDOPSIS THALIANA PLANT U-BOX 38); Encodes a protein containing a U-box and an A                | 1.003  | 8.89E-07 |
| At5g65310 | ATHB5 (homeobox protein 5); Encodes a class I HDZip (homeodomain-leucine zipper) protein that is a positi   | -1.663 | 1.39E-08 |
| At5g65320 | basic helix-loop-helix (bHLH) DNA-binding superfamily protein                                               | -1.25  | 1.55E-06 |
| At5g65360 | Histone superfamily protein                                                                                 | -1.129 | 2.68E-05 |
| At5g65380 | MATE efflux family protein                                                                                  | 1.133  | 3.86E-08 |
| At5g65390 | AGP7 (arabinogalactan protein 7)                                                                            | -1.215 | 1.64E-06 |
| At5g65590 | Dof-type zinc finger DNA-binding family protein                                                             | -1.01  | 3.89E-05 |
| At5g65600 | Concanavalin A-like lectin protein kinase family protein                                                    | 2.708  | 1.88E-07 |
| At5g65630 | GTE7 (global transcription factor group E7); This gene is predicted to encode a bromodomain-containing prot | -1.038 | 9.22E-07 |
| At5g65650 | Protein of unknown function (DUF1195)                                                                       | -1.051 | 9.49E-06 |
| At5g65730 | XTH6 (xyloglucan endotransglucosylase/hydrolase 6)                                                          | -1.134 | 0.00176  |
| At5g65800 | ACS5 (ACC synthase 5); 1-aminocyclopropane-1-carboxylate synthase (ACS) is encoded by a multigene famil     | -1.45  | 1.01E-05 |
| At5g65860 | ankyrin repeat family protein                                                                               | -1.008 | 1.34E-05 |
| At5g65920 | ARM repeat superfamily protein                                                                              | 1.475  | 9.13E-07 |
| At5g65970 | ATMLO10 (MILDEW RESISTANCE LOCUS O 10); A member of a large family of seven-transmembrane do                | -1.244 | 3.24E-07 |
| At5g66020 | ATSAC1B (SUPPRESSOR OF ACTIN 1B); Mutants in this gene are unable to express female sterility in resp       | 1.427  | 1.88E-05 |
| At5g66050 | Wound-responsive family protein                                                                             | 1.02   | 7.15E-08 |
| At5g66070 | RING/U-box superfamily protein                                                                              | 1.78   | 4.73E-06 |
| At5g66090 | unknown protein                                                                                             | 1.536  | 3.47E-08 |
| At5g66100 | winged-helix DNA-binding transcription factor family protein                                                | 1.193  | 1.61E-07 |
| At5g66170 | STR18 (sulfurtransferase 18); Encodes a thiosulfate sulfurtransferase/rhodanese.                            | 1.005  | 3.39E-05 |
| At5g66210 | CPK28 (calcium-dependent protein kinase 28); member of Calcium Dependent Protein Kinase                     | 1.443  | 0.0002   |
| At5g66330 | Leucine-rich repeat (LRR) family protein                                                                    | -1.224 | 4.91E-08 |
| At5g66440 | unknown protein                                                                                             | -1.147 | 7.94E-08 |
| At5g66480 | unknown protein                                                                                             | 1.349  | 1.67E-07 |
| At5g66580 | unknown protein                                                                                             | -1.202 | 4.76E-05 |
| At5g66590 | CAP (Cysteine-rich secretory proteins, Antigen 5, and Pathogenesis-related 1 protein) superfamily protein   | -1.827 | 5.35E-10 |
| At5g66620 | DAR6 (DA1-related protein 6)                                                                                | 2.019  | 6.03E-07 |
| At5g66631 | Tetratricopeptide repeat (TPR)-like superfamily protein                                                     | 1.264  | 3.49E-07 |



|           |                                                                                                               |        |          |
|-----------|---------------------------------------------------------------------------------------------------------------|--------|----------|
| At5g66850 | MAPKKK5 (mitogen-activated protein kinase kinase kinase 5); member of MEKK subfamily                          | 1.811  | 2.54E-07 |
| At5g66880 | SNRK2-3 (SUCROSE NONFERMENTING 1 (SNF1)-RELATED PROTEIN KINASE 2-3); encodes a membe                          | 1.569  | 5.38E-09 |
| At5g66890 | Leucine-rich repeat (LRR) family protein                                                                      | 1.071  | 0.00625  |
| At5g66900 | Disease resistance protein (CC-NBS-LRR class) family                                                          | 1.242  | 5.10E-07 |
| At5g67060 | HEC1 (HECATE 1)                                                                                               | -1.011 | 0.00118  |
| At5g67090 | Subtilisin-like serine endopeptidase family protein                                                           | -1.174 | 6.35E-06 |
| At5g67140 | F-box/RNI-like superfamily protein                                                                            | 1.236  | 2.79E-06 |
| At5g67250 | SKIP2 (SKP1/ASK1-interacting protein 2); Encodes an SKP1 interacting partner (SKIP2).Encodes an F-box p       | 1.225  | 1.21E-07 |
| At5g67310 | CYP81G1 (cytochrome P450, family 81, subfamily G, polypeptide 1); member of CYP81G                            | 2.632  | 4.73E-05 |
| At5g67340 | ARM repeat superfamily protein                                                                                | 1.956  | 1.31E-07 |
| At5g67350 | unknown protein                                                                                               | 1.934  | 7.82E-08 |
| At5g67370 | Protein of unknown function (DUF1230)                                                                         | 1.494  | 3.29E-05 |
| At5g67390 | unknown protein                                                                                               | -1.219 | 6.54E-05 |
| At5g67450 | AZF1 (zinc-finger protein 1); Encodes zinc-finger protein. mRNA levels are elevated in response to low tempe  | 1.79   | 3.60E-06 |
| At5g67540 | Arabinanase/levansucrase/invertase                                                                            | 1.483  | 1.12E-08 |
| At5g67620 | unknown protein                                                                                               | -1.693 | 2.18E-06 |
| AtCg00100 | tRNA-Gly; tRNA-Gly                                                                                            | -1.328 | 0.00033  |
| AtCg00130 | ATPF (ATPase, F0 complex, subunit B/B', bacterial/chloroplast); ATPase F subunit.                             | -1.239 | 0.00029  |
| AtCg00640 | RPL33 (ribosomal protein L33); encodes a chloroplast ribosomal protein L33, a constituent of the large subuni | -1.262 | 0.00012  |
| AtCg00650 | RPS18 (ribosomal protein S18); chloroplast-encoded ribosomal protein S18                                      | -1.154 | 1.73E-06 |
| AtCg00750 | RPS11 (ribosomal protein S11); 30S chloroplast ribosomal protein S11                                          | -1.136 | 3.21E-07 |
| AtCg00770 | RPS8 (ribosomal protein S8); chloroplast 30S ribosomal protein S8                                             | -1.316 | 1.81E-06 |
| AtCg00780 | RPL14 (ribosomal protein L14); encodes a chloroplast ribosomal protein L14, a constituent of the large subuni | -1.466 | 1.20E-07 |
| AtCg00790 | RPL16 (ribosomal protein L16); chloroplast gene encoding a ribosomal protein L16, which is a constituent of ' | -1.378 | 9.31E-08 |
| AtCg00800 | RPS3 (RESISTANCE TO PSEUDOMONAS SYRINGAE 3); encodes a chloroplast ribosomal protein S3, a co                 | -1.097 | 5.52E-07 |
| AtCg00810 | RPL22 (ribosomal protein L22); encodes a chloroplast ribosomal protein L22, a constituent of the large subuni | -1.028 | 3.11E-06 |
| AtCg00840 | RPL23 (RIBOSOMAL PROTEIN L23); One of two chloroplast genes that encode chloroplast ribosomal protei          | -1.036 | 8.19E-06 |
| AtCg00930 | tRNA-Ile; tRNA-Ile                                                                                            | -1.595 | 1.50E-06 |
| AtCg01040 | YCF5 (Cytochrome C assembly protein); hypothetical protein                                                    | -1.17  | 3.12E-05 |
| AtMg00160 | COX2 (cytochrome oxidase 2); cytochrome c oxidase subunit 2                                                   | 1.065  | 0.0002   |
| AtMg01370 | unknown protein.; hypothetical protein                                                                        | -1.152 | 1.24E-07 |
